# Supplementary material
Source: Research Square preprint supplement (doi:10.21203/rs.3.rs-9507974/v1)
Supplement: Supplementary file 1 [file 443e5b688f8aa4f5445cd649.xlsx]

## Sheet: HMEC-1 - Flow vs Static
#log2FC >= 0.585 #p-value cut-off <= 0.05 #q-value cut-off <= 1.00 #Gene biotype: protein_coding #Condition pair: up_MF_vs_MS Column A: Track_id, The database name in gene level. Column B: Gene_Name, The name of gene. Column C: Locus, The genomic coordinates of gene. Column D: Strand, Strand of the gene. Column E: Gene_Type, The biological type of gene. Column F: log2FC, if the comparison is test…
Annotation					DE Statistic				FPKM
Track_id	Gene_Name	Locus	Strand	Gene_Type	log2FC	Fold_Change	p_value	q_value	MF_FPKM	MS_FPKM	MFA	MFB	MFC	MFD	MFE	MFF	MSA	MSB	MSC	MSD	MSE	MSF
ENSG00000003436.15_3	TFPI	chr2:188328957-188430487	-	protein_coding	-0.742444	0.597726	1.44502e-06	0.000390217	4.59302	5.33546	21.2903	19.7029	25.4736	25.0767	24.4349	23.3879	40.1323	37.9472	42.1208	43.9861	37.0452	35.6505
ENSG00000010818.9_2	HIVEP2	chr6:143072604-143277835	-	protein_coding	0.850424	1.80303	0.00356847	0.0463472	2.17122	1.32079	3.62571	3.90593	4.69643	4.4546	1.62077	3.51769	1.73281	1.64749	2.12348	2.25618	0.802144	0.832362
ENSG00000013588.7_3	GPRC5A	chr12:13043716-13070871	+	protein_coding	-0.947466	0.518542	8.34151e-10	4.0177e-06	2.40978	3.35725	4.24273	4.53559	4.15961	4.38636	3.90099	4.6962	8.986	10.0043	9.01856	9.1545	8.6375	9.75013
ENSG00000023445.13_2	BIRC3	chr11:102188181-102210134	+	protein_coding	-1.15027	0.450541	0.000133292	0.00557334	1.05871	2.20898	0.67689	0.634328	1.3395	1.11503	2.20901	0.877438	3.88581	3.61588	4.21282	5.19777	2.55845	2.7675
ENSG00000023608.4_3	SNAPC1	chr14:62229075-62263146	+	protein_coding	-0.616136	0.652416	0.000233516	0.00799848	4.45746	5.0736	18.8133	16.8256	23.5895	22.2033	26.0262	19.6486	31.7803	28.1675	34.5742	36.1766	29.4004	36.9345
ENSG00000029639.10_2	TFB1M	chr6:155578643-155635627	-	protein_coding	-0.705855	0.613079	7.76325e-05	0.0039617	1.5122	2.21806	1.42686	1.27124	2.20513	1.77138	2.42442	2.21272	3.53074	3.15569	3.54339	4.36631	3.63913	3.76327
ENSG00000030419.16_3	IKZF2	chr2:213864415-214017151	-	protein_coding	-0.796271	0.575836	0.00283461	0.040376	0.518819	1.31509	0.263235	0.384445	0.275022	0.476563	0.311932	1.00281	1.99037	1.89495	1.97453	2.10623	0.515552	0.957498
ENSG00000041982.15_3	TNC	chr9:117781857-117880536	-	protein_coding	0.770194	1.7055	0.0003579	0.0107387	2.47315	1.70296	3.3265	3.48134	4.71348	4.99532	4.86432	6.52463	1.8196	1.82725	2.77	2.75223	1.9866	2.53583
ENSG00000050344.8_2	NFE2L3	chr7:26191860-26226745	+	protein_coding	-0.670235	0.628404	1.31786e-05	0.00140017	3.40759	4.07782	9.10721	7.88581	10.1403	11.4864	9.74131	9.64142	14.9833	14.8866	18.0636	17.8921	14.9545	14.8935
ENSG00000052795.12_3	FNIP2	chr4:159690290-159829201	+	protein_coding	0.750371	1.68223	4.47221e-06	0.000794092	3.19229	2.44192	8.51681	8.76652	8.26663	9.24597	6.71423	7.56738	4.40343	4.40567	5.03334	4.96117	3.57029	4.36029
ENSG00000056050.6_3	HPF1	chr4:170650616-170679104	-	protein_coding	-0.592304	0.663283	4.65193e-05	0.00287135	3.98717	4.57947	13.8102	12.0266	16.355	14.4329	18.2762	14.9683	21.4907	22.2822	25.6294	21.9581	22.7517	23.5659
ENSG00000057019.15_3	DCBLD2	chr3:98514785-98620533	-	protein_coding	-0.6545	0.635296	0.0124373	0.100947	3.65283	4.30733	11.9038	12.0351	12.6167	12.278	8.98675	12.0381	25.5075	23.1484	21.0208	24.7673	13.4497	10.4763
ENSG00000060982.14_2	BCAT1	chr12:24962956-25102393	-	protein_coding	0.990105	1.98633	7.59491e-08	7.57271e-05	5.53031	4.5402	45.5939	44.7668	43.5045	41.8416	51.092	45.0057	25.0803	22.9409	22.3097	23.8162	18.3764	21.6687
ENSG00000063322.13_2	MED29	chr19:39881943-39891277	+	protein_coding	-1.04281	0.485383	0.046155	0.229591	1.92161	2.96442	1.50322	3.33029	1.1263	12.0207	2.704	1.6597	8.12334	2.77323	9.27405	9.71705	8.92406	5.01033
ENSG00000066651.18_3	TRMT11	chr6:126307576-126360422	+	protein_coding	-0.616455	0.652272	0.00212363	0.0332848	1.77856	2.39502	2.64552	1.54	2.90371	2.91241	2.75201	2.07346	3.77017	4.53957	5.73588	5.27894	3.40987	3.29653
ENSG00000067955.13_3	CBFB	chr16:67063019-67134961	+	protein_coding	0.864611	1.82085	7.97509e-06	0.00108632	6.43438	5.56977	89.0801	84.8757	92.6833	92.1143	69.5034	86.9548	54.4136	51.3122	52.1791	43.0998	38.0444	42.256
ENSG00000069702.10_2	TGFBR3	chr1:92145900-92371892	-	protein_coding	-0.608892	0.6557	0.000708212	0.0169058	1.20192	1.81081	1.1231	1.36924	1.39805	1.57144	1.15344	1.2189	2.80507	2.8567	3.0367	3.13164	2.09699	1.46028
ENSG00000070404.9_3	FSTL3	chr19:676365-683399	+	protein_coding	0.624822	1.54202	0.00724579	0.0707762	5.93988	5.31506	66.0748	63.8401	46.3444	54.5653	73.4385	61.8369	28.8018	36.8692	32.1228	33.9847	48.5881	60.3812
ENSG00000070614.14_3	NDST1	chr5:149865381-149937773	+	protein_coding	0.821126	1.76678	0.0118355	0.0977769	3.8272	3.00608	14.2344	15.6371	12.5178	15.2117	9.97436	12.4152	8.95614	4.43223	10.6644	10.8308	7.56703	3.20472
ENSG00000071282.11_2	LMCD1	chr3:8543393-8616359	+	protein_coding	1.00692	2.00961	8.12939e-06	0.00108632	2.59548	1.58856	4.49339	4.90619	4.95048	5.10691	5.1757	5.69411	1.48059	1.94136	1.61159	1.75013	2.36585	3.19537
ENSG00000071575.11_2	TRIB2	chr2:12857015-12882860	+	protein_coding	0.613301	1.52976	3.20809e-06	0.000660052	4.16758	3.55428	16.1022	17.4971	17.4722	19.0441	13.9635	18.218	10.5261	10.2435	11.2749	10.4148	11.512	10.5684
ENSG00000072571.19_3	HMMR	chr5:162887209-162918951	+	protein_coding	-0.665111	0.63064	0.000383124	0.0111572	4.95391	5.61902	24.2576	25.585	39.5495	33.9588	35.049	24.8342	51.1074	43.2374	50.4537	49.7696	50.2447	44.668
ENSG00000073756.11_2	PTGS2	chr1:186640923-186649559	-	protein_coding	0.799824	1.74089	2.30788e-05	0.00191856	0.996321	0.196497	0.958031	0.815575	1.02228	0.836336	0.725797	1.76642	0.20744	0.13917	0.256017	0.134211	0.0244719	0.127888
ENSG00000073792.15_2	IGF2BP2	chr3:185361527-185542844	-	protein_coding	-0.637542	0.642807	0.0189104	0.132855	4.84184	5.47938	25.8663	28.6013	31.2931	26.6604	23.3861	31.1075	54.1649	50.9316	55.0693	59.5843	33.3879	22.5595
ENSG00000074527.11_2	NTN4	chr12:96051583-96184930	-	protein_coding	-0.908734	0.532652	9.77213e-06	0.00119421	5.31154	6.22027	35.5668	36.1544	39.5084	42.1352	42.7574	36.7628	76.833	74.7951	83.9024	91.2975	61.9683	58.005
ENSG00000074590.13_3	NUAK1	chr12:106457118-106533811	-	protein_coding	1.11948	2.17268	2.8277e-08	4.07251e-05	3.41894	2.29947	10.3899	11.142	8.914	10.3392	9.02237	8.60764	3.86479	3.54477	3.95786	4.32252	3.47826	4.44696
ENSG00000075213.10_4	SEMA3A	chr7:83585093-84122040	-	protein_coding	-0.613843	0.653454	0.00592954	0.062436	1.73344	2.34728	2.48405	2.64884	2.3224	2.64865	2.1206	1.81085	5.04923	4.79882	5.22141	4.90465	3.44987	2.02789
ENSG00000081277.12_3	PKP1	chr1:201252580-201302121	+	protein_coding	1.07591	2.10805	0.00376809	0.0476043	2.62128	1.54536	5.43396	5.35903	6.22361	5.62148	3.79044	4.78816	3.06708	2.99633	2.67013	3.01248	0.723693	0.498667
ENSG00000081923.11_3	ATP8B1	chr18:55313658-55470333	-	protein_coding	-0.602841	0.658456	0.00336702	0.0449468	2.83747	3.44031	5.36798	5.25002	7.02789	6.60743	6.56357	6.25326	10.4697	9.91837	12.1895	13.8429	6.73051	7.63292
ENSG00000082482.13_3	KCNK2	chr1:215179118-215410436	+	protein_coding	-0.744604	0.596832	6.46661e-05	0.00347339	0.834323	1.57893	0.376177	1.02497	0.584278	0.9935	1.11528	0.725956	1.99678	1.76933	2.06306	1.80781	2.56738	1.79205
ENSG00000086991.12_2	NOX4	chr11:89057524-89231355	-	protein_coding	1.0657	2.09318	0.000244823	0.00828562	2.64479	1.57909	4.50218	5.35589	4.75272	4.64881	6.87533	5.6858	1.65621	1.47049	1.37401	1.44917	2.84759	3.84607
ENSG00000087245.12_3	MMP2	chr16:55423612-55540603	+	protein_coding	0.996633	1.99534	0.00115069	0.0233415	5.75334	4.75671	50.6534	53.6923	63.313	66.453	33.4675	57.3227	33.4001	27.8801	27.5595	36.7406	18.0005	18.1862
ENSG00000087903.12_3	RFX2	chr19:5993175-6199583	-	protein_coding	0.812765	1.75657	5.25889e-07	0.00021989	1.83839	1.02563	2.79249	2.71492	2.80872	2.75147	2.00382	2.45893	1.11024	1.05259	1.23983	1.14806	0.827485	0.869485
ENSG00000088826.17_2	SMOX	chr20:4101627-4168394	+	protein_coding	0.64996	1.56912	0.00738664	0.0715053	4.19853	3.54857	16.1418	11.2469	20.4085	14.6262	21.3524	23.4033	10.7466	11.3258	10.6526	6.97155	12.8642	12.7646
ENSG00000090776.5_2	EFNB1	chrX:68048840-68061990	+	protein_coding	-0.707951	0.612189	2.538e-05	0.00202184	2.56834	3.2763	3.95796	4.68194	4.95355	4.80574	6.55518	4.91855	7.6053	8.07741	8.96402	8.55401	8.89712	10.2389
ENSG00000091039.16_3	OSBPL8	chr12:76745577-76953589	-	protein_coding	0.741844	1.67231	0.00105503	0.0220925	5.07326	4.33141	33.2981	32.2374	36.4038	34.1858	26.7159	34.0191	23.0277	21.2355	22.1188	24.3954	14.4173	12.7665
ENSG00000095752.6_3	IL11	chr19:55875757-55881831	-	protein_coding	2.10509	4.30225	9.29879e-10	4.0177e-06	4.28126	2.17617	21.3467	19.6117	18.4592	18.0492	13.4538	20.8987	3.47743	3.31483	3.54835	3.63116	3.32937	3.8372
ENSG00000097007.17_3	ABL1	chr9:133589333-133763062	+	protein_coding	0.716425	1.64311	0.012762	0.102555	4.7062	3.98977	25.692	28.0196	29.9401	30.3813	14.2066	26.6659	16.1376	17.5632	19.4571	19.5598	10.3371	9.59935
ENSG00000099282.9_3	TSPAN15	chr10:71211229-71267425	+	protein_coding	1.12706	2.18413	5.36389e-05	0.00309008	4.63662	3.50956	24.8783	25.2241	19.0102	21.9301	30.5743	23.0956	9.61181	10.6671	8.71027	7.13458	14.0957	13.7816
ENSG00000099860.8_3	GADD45B	chr19:2476120-2478257	+	protein_coding	0.94442	1.92442	1.57153e-05	0.00156694	5.77546	4.83104	61.0121	55.198	62.2431	59.5475	36.9915	52.276	24.0529	29.4183	28.3873	27.4945	25.7947	30.1006
ENSG00000100311.16_2	PDGFB	chr22:39619364-39640756	-	protein_coding	1.22064	2.33051	2.30921e-05	0.00191856	3.86034	2.63969	11.2349	14.6708	12.7012	12.2461	15.8729	14.9859	6.23534	6.10055	5.99125	6.54113	2.95208	4.47261
ENSG00000100994.11_3	PYGB	chr20:25228705-25278650	+	protein_coding	-0.587213	0.665628	0.00265714	0.0388734	5.85496	6.44217	52.8688	55.8341	49.4783	52.1246	75.6881	58.7085	70.9588	78.0002	75.9155	77.4038	107.3	115.421
ENSG00000101306.10_2	MYLK2	chr20:30407111-30422492	+	protein_coding	1.35705	2.56161	1.06292e-05	0.00121188	3.02147	1.66442	7.04293	7.69565	5.91799	6.67372	8.69615	6.96186	1.60165	1.39715	2.02038	2.02774	2.57273	3.9787
ENSG00000101337.15_3	TM9SF4	chr20:30697309-30755061	+	protein_coding	-0.610482	0.654978	0.000589317	0.0147466	3.42623	4.03671	9.89373	8.79798	9.149	9.60436	13.1916	8.46528	16.5734	17.1178	17.3068	17.1361	11.786	13.4603
ENSG00000101665.8_2	SMAD7	chr18:46446223-46477081	-	protein_coding	0.686664	1.60956	6.24015e-07	0.000227208	3.96146	3.2748	14.9304	14.8384	15.9791	15.4846	12.9742	13.483	9.05528	8.46322	8.70593	8.73443	7.5563	9.68591
ENSG00000101670.11_3	LIPG	chr18:47087069-47125552	+	protein_coding	0.951598	1.93401	1.45079e-07	0.000104188	3.22082	2.26922	9.01472	8.23524	8.11703	7.52582	8.94349	8.18677	3.71107	3.70057	3.26813	3.76306	4.93539	3.69653
ENSG00000102271.13_2	KLHL4	chrX:86772752-86925050	+	protein_coding	-0.786775	0.579639	0.000152426	0.00611684	1.33908	2.12585	1.80893	1.94127	1.35054	1.649	1.32407	1.19302	4.22524	3.71083	3.57602	3.71245	3.34816	1.99524
ENSG00000102572.14_3	STK24	chr13:99097439-99230194	-	protein_coding	0.657304	1.57713	0.00267122	0.0390354	4.4685	3.8112	23.2156	24.9504	15.6101	22.85	17.2291	24.9451	13.6784	17.2062	16.0298	11.521	11.7573	9.5247
ENSG00000102580.14_3	DNAJC3	chr13:96329393-96447243	+	protein_coding	0.642896	1.56146	3.12397e-05	0.00226217	5.35377	4.71087	44.2875	43.3118	35.8586	48.0175	36.1581	33.7075	25.216	24.8213	26.951	26.3171	22.3218	25.7634
ENSG00000102699.5_2	PARP4	chr13:24995064-25086948	-	protein_coding	-0.773378	0.585046	0.000141965	0.00582327	3.21143	3.98481	7.78535	7.48481	9.94741	9.08219	7.12029	8.45339	14.9443	15.1136	17.286	18.514	14.2102	10.295
ENSG00000103647.12_2	CORO2B	chr15:68871308-69020145	+	protein_coding	0.585925	1.501	0.00462239	0.0533055	2.82603	2.24011	6.31179	7.4731	6.47202	6.01667	3.95731	6.89658	3.65946	4.25407	4.88046	4.5663	2.6319	2.82024
ENSG00000104081.13_3	BMF	chr15:40380091-40401093	-	protein_coding	0.817128	1.7619	0.000212906	0.00762808	2.23751	1.42038	4.4885	3.62399	3.35886	4.16943	3.16414	3.61886	1.83711	1.84748	2.10778	1.97487	1.88141	0.708455
ENSG00000104611.11_3	SH2D4A	chr8:19171128-19253729	+	protein_coding	-0.588212	0.665167	0.00311617	0.0426975	1.79727	2.38548	1.93311	1.74673	2.81398	2.70432	3.07086	2.80424	3.202	3.1216	4.1233	4.52928	5.03813	5.87004
ENSG00000105245.9_2	NUMBL	chr19:41171810-41196877	-	protein_coding	0.605967	1.522	0.00633814	0.0652542	3.25838	2.65241	8.98564	9.44339	9.24631	9.9749	5.46064	9.13333	5.82026	6.75123	6.42037	6.02504	3.9938	3.48798
ENSG00000105329.9_2	TGFB1	chr19:41807492-41859816	-	protein_coding	0.742336	1.67288	0.000225646	0.00788442	6.89107	6.14873	120.822	134.68	102.552	98.9368	108.992	147.602	73.7519	83.0665	74.2049	76.1803	64.5678	52.3373
ENSG00000105520.10_2	PLPPR2	chr19:11466062-11476374	+	protein_coding	0.607596	1.52372	0.00018806	0.00702487	4.22064	3.61305	19.1392	20.2873	16.8913	16.3005	14.0251	20.065	10.6024	12.9664	11.2784	13.0087	10.6366	9.34709
ENSG00000105974.11_3	CAV1	chr7:116164839-116201238	+	protein_coding	-0.741204	0.59824	4.12153e-06	0.000741991	7.05411	7.79531	128.783	121.3	124.695	137.503	162.907	120.61	206.33	203.525	226.484	212.667	227.6	254.014
ENSG00000106070.17_3	GRB10	chr7:50657760-50861159	-	protein_coding	0.63346	1.55128	1.78212e-05	0.00168612	3.88315	3.24969	14.2159	14.4877	14.2187	13.6965	11.3479	14.8564	9.02483	8.71358	9.24395	9.70874	7.30147	7.35046
ENSG00000106484.14_2	MEST	chr7:130126012-130146137	+	protein_coding	-0.957994	0.514772	5.74986e-05	0.0031987	3.56913	4.52713	7.44342	12.9658	11.9161	13.9783	10.6051	9.56022	22.7043	24.7809	24.2215	23.5963	20.5899	17.3566
ENSG00000106511.5_2	MEOX2	chr7:15650837-15726437	-	protein_coding	-0.90289	0.534814	0.000125241	0.00542935	1.31296	2.21585	1.84766	1.56159	1.43717	1.86494	1.4401	0.892496	3.83028	3.30546	3.89495	5.52673	3.28452	2.5309
ENSG00000107738.19_3	VSIR	chr10:73507316-73533255	-	protein_coding	-1.01491	0.494859	1.52722e-07	0.000104188	1.17785	2.19276	1.30338	1.07347	1.21292	1.35691	1.53162	1.12637	3.08022	3.20606	3.54653	3.3815	3.79074	4.57518
ENSG00000108861.8_2	DUSP3	chr17:41843489-41856356	-	protein_coding	-1.0895	0.469926	0.0392858	0.210596	3.05814	4.14763	7.41874	8.55866	7.09307	6.38166	7.91994	6.78531	25.6396	5.79958	5.34269	25.2012	29.5262	32.7364
ENSG00000109189.12_2	USP46	chr4:53457138-53525502	-	protein_coding	0.762106	1.69597	1.88547e-05	0.00172245	2.60297	1.84086	5.02045	5.29383	5.70877	5.60446	3.92271	5.08409	2.75865	2.68859	3.04667	2.95373	1.86379	2.32647
ENSG00000109321.10_2	AREG	chr4:75310851-75320726	+	protein_coding	-0.934738	0.523137	0.000134613	0.00559249	1.10748	2.04222	0.588359	0.934029	1.52461	1.17232	1.98745	0.988293	2.88526	2.36908	3.13324	3.94544	2.791	3.81323
ENSG00000111057.10_3	KRT18	chr12:53342655-53346685	+	protein_coding	-0.651143	0.636775	0.00514447	0.0572875	5.76615	6.4173	65.1501	48.2789	41.7075	53.2012	77.5232	42.8541	83.2023	72.9377	78.8436	66.4141	102.776	111.077
ENSG00000111186.12_2	WNT5B	chr12:1639057-1756409	+	protein_coding	0.692271	1.61583	0.000552558	0.0140712	3.41973	2.72746	9.58337	10.5234	7.04883	9.93867	10.3642	11.3085	5.309	5.28083	4.33822	4.82817	7.45664	7.09425
ENSG00000111424.10_2	VDR	chr12:48235320-48336831	-	protein_coding	0.669678	1.59072	0.00010057	0.00483152	1.57802	0.908344	1.87274	1.88875	2.46404	2.53763	1.36513	1.94467	0.896703	0.851982	1.24984	0.882258	0.595491	0.841926
ENSG00000111859.16_3	NEDD9	chr6:11183531-11382581	-	protein_coding	0.879271	1.83945	1.07212e-08	1.73711e-05	4.05707	3.1778	15.7263	16.3168	15.3709	16.9847	13.9486	15.6862	8.12665	8.42498	8.35009	8.69769	7.50187	7.28108
ENSG00000112559.13_2	MDFI	chr6:41604620-41621984	+	protein_coding	0.723618	1.65132	0.0016444	0.0288426	3.86999	3.14637	14.276	15.8832	10.308	11.0319	17.1999	14.2981	6.15284	7.33409	7.13063	6.40003	10.0728	11.1325
ENSG00000112715.21_4	VEGFA	chr6:43737921-43754224	+	protein_coding	0.719699	1.64684	6.73275e-06	0.000959009	1.84196	1.12226	2.34634	2.15138	3.16724	2.52866	2.52281	2.88586	1.06758	1.00796	1.17968	1.09814	1.10734	1.65962
ENSG00000115392.11_3	FANCL	chr2:58386378-58468507	-	protein_coding	-0.746792	0.595927	0.000130318	0.00553266	1.60147	2.34826	1.71882	1.34891	2.7888	1.99736	2.23133	2.33179	4.49941	3.8655	4.92182	4.52136	3.8037	3.14826
ENSG00000115461.4_3	IGFBP5	chr2:217536828-217560248	-	protein_coding	1.05488	2.07755	1.72627e-06	0.000447518	5.11176	4.05688	30.7514	32.3161	37.7742	28.8102	31.7868	41.6315	16.1469	14.9017	16.3051	17.8711	12.3769	16.8441
ENSG00000115594.11_3	IL1R1	chr2:102681004-102796334	+	protein_coding	0.788053	1.72674	7.21234e-05	0.00372455	2.30116	1.51311	3.25847	3.55612	5.45646	4.12508	2.83072	4.82753	1.79449	1.98869	1.93119	1.95104	1.9622	1.52653
ENSG00000115756.12_3	HPCAL1	chr2:10443015-10567743	+	protein_coding	-0.609929	0.655229	0.00170878	0.0291705	2.72448	3.33441	4.64673	5.10189	4.95253	4.87524	7.84596	6.81928	8.04437	10.3585	7.54746	7.6347	10.3694	11.2187
ENSG00000115963.13_2	RND3	chr2:151324709-151395525	-	protein_coding	-0.982349	0.506155	0.0217847	0.145478	5.09756	6.07991	14.2364	52.3079	46.7505	15.3653	48.6173	50.1565	68.7332	65.9579	74.1751	76.8148	63.6364	53.2694
ENSG00000116489.12_2	CAPZA1	chr1:113161795-113214241	+	protein_coding	0.679906	1.60204	0.00448371	0.0525477	6.60736	5.92745	94.5678	82.677	108.48	94.398	99.3693	101.492	49.3163	51.1199	52.6641	110.043	60.9606	51.4859
ENSG00000116525.13_2	TRIM62	chr1:33611003-33647660	-	protein_coding	0.810545	1.75387	1.85865e-05	0.00172245	2.44302	1.63248	4.06411	4.42659	4.49097	5.5732	3.68926	4.55876	2.26977	2.32511	2.398	2.44924	1.37927	1.92979
ENSG00000116574.5_2	RHOU	chr1:228870824-228882416	+	protein_coding	0.911811	1.88141	3.10165e-06	0.000648445	4.19745	3.28564	19.2984	18.2102	15.2243	19.2749	15.4024	17.1272	8.24468	7.75364	8.98262	7.99532	8.39182	11.5999
ENSG00000116791.13_2	CRYZ	chr1:75171166-75199092	-	protein_coding	-0.599133	0.66015	0.00243166	0.0363962	2.88038	3.47951	4.56917	5.08253	6.97255	6.48533	9.14018	6.7759	12.304	10.714	9.32795	10.6066	10.5844	7.89894
ENSG00000117152.13_2	RGS4	chr1:163038565-163046592	+	protein_coding	-2.24691	0.210675	0.000419379	0.0116365	3.28564	5.53255	9.14543	10.1277	7.99823	6.82326	9.9607	8.87197	126.842	28.1271	106.579	32.228	26.6879	25.6866
ENSG00000117226.11_3	GBP3	chr1:89472349-89488577	-	protein_coding	-0.588275	0.665138	0.000167337	0.00650074	1.67323	2.2615	1.93586	2.03303	2.82765	2.27202	2.29818	1.86099	3.50295	3.64683	4.5716	3.30307	4.76725	3.20051
ENSG00000117479.12_3	SLC19A2	chr1:169433147-169455241	-	protein_coding	1.13644	2.19838	4.5044e-07	0.00021288	3.0795	1.94306	7.26034	7.0695	9.37336	7.84932	5.83993	7.71763	2.64424	3.32524	2.77502	3.36605	2.44177	2.61497
ENSG00000118257.16_3	NRP2	chr2:206546714-206662857	+	protein_coding	0.940118	1.91868	0.000267342	0.00870675	3.27092	2.3308	8.85503	8.86943	10.472	9.52211	5.37062	9.8141	4.32811	4.36613	4.97128	5.1329	2.78863	3.08688
ENSG00000118263.14_3	KLF7	chr2:207938861-208031991	-	protein_coding	0.678106	1.60004	4.89773e-05	0.00295635	3.87706	3.19896	13.5432	14.0421	15.406	13.5494	11.9359	13.8955	8.78297	8.3303	9.62092	9.13322	5.94398	7.79032
ENSG00000118523.5_2	CTGF	chr6:132269316-132272513	-	protein_coding	0.738273	1.66818	4.5372e-06	0.000794745	9.96258	9.22431	1097.7	1094.25	946.852	998.201	844.172	1023.43	637.704	660.677	592.736	616.205	495.635	594.318
ENSG00000119401.10_3	TRIM32	chr9:119449581-119463579	+	protein_coding	0.922016	1.89476	0.0365444	0.201227	2.75836	1.83634	2.23457	10.4249	4.99355	8.82453	7.3491	4.28184	3.85505	1.74053	1.67542	1.40461	6.7716	2.11735
ENSG00000119917.13_2	IFIT3	chr10:91087651-91100728	+	protein_coding	-0.585389	0.66647	0.00209309	0.0330458	0.969142	1.55453	0.895889	0.869331	1.65904	1.36973	0.517984	0.660567	1.67154	1.79268	2.5918	1.84489	1.6767	2.14777
ENSG00000120337.8_2	TNFSF18	chr1:173009100-173020103	-	protein_coding	-0.990607	0.503266	3.78382e-05	0.00250234	0.433439	1.42405	0.228264	0.388065	0.26117	0.508135	0.40385	0.332395	1.99218	1.86736	2.29473	2.21169	0.865179	1.20466
ENSG00000122042.9_2	UBL3	chr13:30338508-30424821	-	protein_coding	0.641111	1.55953	6.40732e-06	0.000932466	3.40152	2.76041	9.02257	9.78699	9.35098	11.0628	8.61906	9.7232	6.2152	5.71038	6.06116	6.72318	4.85659	5.25879
ENSG00000122641.10_3	INHBA	chr7:41706766-41745432	-	protein_coding	0.924031	1.89741	6.32926e-06	0.000932466	5.11043	4.18639	35.7345	36.163	31.4727	32.7144	32.7265	32.7176	18.0871	14.6558	19.2334	20.1943	12.7807	19.6257
ENSG00000123179.13_2	EBPL	chr13:50234859-50265611	-	protein_coding	-0.65364	0.635675	0.00282419	0.0403162	2.6912	3.34484	5.55203	5.496	4.59375	4.51399	6.93562	5.96653	7.45266	12.0044	6.80406	7.46093	9.82138	13.0047
ENSG00000123610.4_2	TNFAIP6	chr2:152214106-152236562	+	protein_coding	1.13129	2.19055	3.22312e-08	4.17781e-05	1.22767	0.0963766	1.19573	0.896277	1.38215	1.52424	1.55916	1.57463	0.116916	0.118393	0.0506805	0.0511783	0.0822096	0
ENSG00000124216.3_2	SNAI1	chr20:48599536-48605423	+	protein_coding	1.24624	2.37222	6.28654e-07	0.000227208	5.36683	4.12059	44.3627	47.7373	34.6084	34.3306	34.2043	49.4193	15.9405	18	15.0858	15.2687	18.6383	15.7473
ENSG00000124225.15_3	PMEPA1	chr20:56223448-56286592	-	protein_coding	1.93691	3.82884	1.06343e-08	1.73711e-05	3.31897	1.38206	8.75023	9.98802	9.38062	7.75065	8.3435	9.86311	2.16529	1.81799	1.59808	1.99436	1.07077	1.1818
ENSG00000124496.12_2	TRERF1	chr6:42192669-42419789	-	protein_coding	-0.599164	0.660137	0.0223247	0.147114	0.629705	1.22887	0.556236	0.661025	0.774362	0.499145	0.240224	0.608874	1.97373	1.81805	2.08935	1.84578	0.701873	0.322243
ENSG00000124593.15_4	AL365205.1	chr6:41748087-41757879	+	protein_coding	-1.27957	0.41192	0.0263922	0.163682	1.64972	2.92929	2.29589	2.27303	2.20825	1.9955	1.99263	2.076	12.2218	18.2798	2.82172	15.4027	2.9717	2.07807
ENSG00000124762.13_2	CDKN1A	chr6:36644237-36655116	+	protein_coding	-0.646265	0.638932	0.0320383	0.184815	5.2907	5.93696	23.564	47.7496	22.7138	36.2182	70.2363	46.7778	55.1611	57.0584	53.5495	61.0274	69.2514	67.2173
ENSG00000124766.6_3	SOX4	chr6:21592999-21598850	+	protein_coding	0.835448	1.78441	0.000274438	0.008871	2.60887	1.77342	5.72736	5.8502	5.21089	4.53404	4.63832	4.77024	3.18241	2.93768	2.65153	3.02746	1.23406	1.95019
ENSG00000125398.5_2	SOX9	chr17:70117161-70122561	+	protein_coding	-0.739658	0.598881	0.0385987	0.207859	1.25817	1.99783	1.32975	1.14883	1.47142	2.21367	0.839624	1.56036	3.93071	3.78204	5.02524	5.15911	1.39024	0.940839
ENSG00000125740.13_3	FOSB	chr19:45971253-45978437	+	protein_coding	0.691879	1.61539	0.000321116	0.00994855	1.12364	0.431762	1.10679	1.49159	1.53345	1.57988	0.540809	1.0246	0.233831	0.32817	0.512409	0.520754	0.287077	0.241647
ENSG00000127528.5_2	KLF2	chr19:16435628-16438685	+	protein_coding	-0.946799	0.518782	1.40736e-05	0.0014478	4.51712	5.46392	22.3657	24.816	16.9794	18.2011	28.6238	22.3629	44.9464	49.738	42.6346	39.6985	43.9756	38.706
ENSG00000128052.8_2	KDR	chr4:55944644-55991756	-	protein_coding	0.725879	1.65391	0.00227895	0.0348757	3.24071	2.51483	10.0518	10.4878	8.46475	9.5385	6.12588	6.90504	5.6821	5.92476	5.50822	5.46404	3.26206	3.20076
ENSG00000128283.6_4	CDC42EP1	chr22:37956454-37965412	+	protein_coding	0.635428	1.5534	9.59651e-05	0.00471174	6.40353	5.7681	91.468	100.04	66.3519	76.7938	80.5013	91.255	45.1158	53.6614	52.2564	54.9777	58.1309	57.9527
ENSG00000128340.14_3	RAC2	chr22:37621301-37640488	-	protein_coding	-0.674278	0.626646	3.09111e-06	0.000648445	3.39907	4.07335	8.9269	10.8573	9.23028	8.42273	9.98566	10.0573	16.825	15.4752	17.4254	16.8693	15.3617	13.3877
ENSG00000128342.4_2	LIF	chr22:30636436-30642840	-	protein_coding	0.594694	1.51015	7.81531e-05	0.00397263	1.4079	0.813203	1.20712	1.33685	2.12969	1.92899	1.78551	1.65054	0.731873	0.69714	0.975254	0.829971	0.538773	0.80018
ENSG00000128510.10_2	CPA4	chr7:129932974-129964020	+	protein_coding	-1.02427	0.49166	6.31035e-07	0.000227208	2.71623	3.7405	5.18383	5.9564	4.80592	6.95236	5.69953	5.05277	11.3646	11.1046	10.9181	13.445	13.9411	13.8109
ENSG00000128923.10_3	MINDY2	chr15:59063391-59154099	+	protein_coding	-0.700183	0.615494	0.00821481	0.0769367	0.774538	1.47472	0.722164	0.602221	0.566765	0.737854	1.13638	0.561211	1.14042	1.10282	1.21431	3.75688	1.58	2.76817
ENSG00000129422.14_3	MTUS1	chr8:17501304-17658426	-	protein_coding	-0.597578	0.660863	2.85606e-05	0.0021276	0.93267	1.53025	1.16957	0.757216	1.1818	0.898584	0.725087	0.775478	2.11634	2.12197	2.03508	1.81532	1.84985	1.4508
ENSG00000129538.13_2	RNASE1	chr14:21269387-21271437	-	protein_coding	-0.606164	0.656941	0.0124371	0.100947	1.15649	1.76266	1.7564	0.358892	1.74732	1.24231	1.71185	0.960806	3.58659	2.65307	2.29857	1.54635	2.17469	2.4165
ENSG00000130513.6_3	GDF15	chr19:18485541-18499986	+	protein_coding	-0.690339	0.619708	0.000101629	0.00483152	3.0316	3.72194	6.9732	7.01142	5.59222	7.6756	10.175	6.32317	11.2916	11.7995	13.2024	12.7024	12.819	11.4755
ENSG00000131435.12_2	PDLIM4	chr5:131593364-131609147	+	protein_coding	1.08887	2.12707	2.04394e-05	0.00181462	4.85847	3.76961	29.321	28.8861	23.757	24.8161	31.8781	30.3017	10.748	14.318	11.682	8.85311	16.2054	15.634
ENSG00000131652.13_2	THOC6	chr16:3074028-3077756	+	protein_coding	-0.591806	0.663512	0.000421042	0.0116365	2.30761	2.89942	3.84336	4.00395	3.59681	3.64397	5.54048	3.35061	5.21895	6.33516	5.65286	7.1956	7.75775	6.92075
ENSG00000131791.7_2	PRKAB2	chr1:146626685-146644129	-	protein_coding	0.786668	1.72509	7.07412e-08	7.57271e-05	3.62701	2.84034	10.9973	11.0465	11.8979	12.8089	10.3705	11.1514	5.57684	5.77214	6.94918	6.41536	6.05229	6.28855
ENSG00000132274.15_3	TRIM22	chr11:5710919-5758319	+	protein_coding	-0.705765	0.613117	3.55166e-05	0.00246185	0.851198	1.55696	0.461119	0.592263	0.95333	0.812647	1.07217	1.01931	1.83125	1.66675	2.50227	2.05368	1.89927	1.77163
ENSG00000132510.10_2	KDM6B	chr17:7743222-7758114	+	protein_coding	0.968504	1.95681	0.00443007	0.0522824	1.4681	0.499597	2.1851	1.8593	2.45953	2.49892	0.276112	2.18737	0.530234	0.607466	0.476937	0.907593	0.0442949	0.103548
ENSG00000134107.4_2	BHLHE40	chr3:5020801-5027008	+	protein_coding	1.64968	3.13765	8.39751e-09	1.73711e-05	5.00874	3.35906	29.0396	29.7006	35.0162	33.5738	26.9478	33.6941	8.0751	9.42909	10.484	10.152	7.51102	10.3121
ENSG00000134198.9_2	TSPAN2	chr1:115590632-115632121	-	protein_coding	1.21124	2.31537	7.89007e-06	0.00108632	2.63423	1.42299	4.81296	4.23543	4.7225	4.05587	6.92905	7.20246	1.56804	1.24069	1.9295	1.73625	1.49541	2.22922
ENSG00000134245.17_2	WNT2B	chr1:113009163-113072787	+	protein_coding	-1.00604	0.497912	6.8092e-05	0.00358784	0.868169	1.87421	0.792257	0.822389	1.0578	1.18191	0.278224	0.973248	2.91526	2.88492	3.2556	3.36551	2.06643	1.80144
ENSG00000134533.6_3	RERG	chr12:15260717-15501609	-	protein_coding	-0.85711	0.552057	2.89296e-05	0.00213287	0.825229	1.68234	0.647436	0.556407	0.754788	0.98019	1.04609	0.697169	2.15516	1.79475	1.76319	1.85533	3.09057	2.84055
ENSG00000134668.12_3	SPOCD1	chr1:32256023-32281652	-	protein_coding	0.616511	1.53316	9.22184e-05	0.004545	3.39033	2.77382	9.61131	10.5323	8.02816	8.489	9.81234	10.7251	5.11673	5.65267	5.45527	5.52583	5.7601	7.83071
ENSG00000135074.15_3	ADAM19	chr5:156822542-157002783	-	protein_coding	1.04345	2.06115	0.00165326	0.0289588	3.92342	2.87998	13.5891	15.0682	16.5537	15.2024	10.2697	15.2388	7.56213	6.91884	8.78963	9.28673	5.41954	2.6305
ENSG00000135111.15_4	TBX3	chr12:115108059-115121969	-	protein_coding	0.713107	1.63933	0.000861855	0.0191948	2.18688	1.47378	3.0753	3.5086	3.83733	3.94569	3.03691	4.0214	2.28133	1.71138	1.92184	2.84648	0.962261	1.33987
ENSG00000135604.9_2	STX11	chr6:144471663-144509507	+	protein_coding	-0.662992	0.631567	3.18231e-05	0.00227896	2.60225	3.26524	4.51051	6.17659	5.19268	5.08813	4.89181	4.70704	8.66696	9.276	8.52832	9.07217	9.96798	6.55502
ENSG00000135723.13_3	FHOD1	chr16:67263290-67281561	-	protein_coding	0.701027	1.62566	5.51241e-05	0.00312017	3.03412	2.33309	5.71248	7.70125	7.83478	6.72599	6.11817	9.64581	3.67198	4.29375	4.17457	4.2467	3.66019	4.23062
ENSG00000135899.17_3	SP110	chr2:231032009-231090444	-	protein_coding	-0.606738	0.65668	0.00120553	0.0239663	1.89299	2.49973	2.04065	2.11928	3.15676	2.62167	3.66978	2.93644	3.6689	3.76024	4.83853	4.60224	5.81067	5.61095
ENSG00000136100.12_2	VPS36	chr13:52986737-53024763	-	protein_coding	-0.594681	0.662191	0.00254681	0.0374707	2.20165	2.79633	3.6695	3.96776	4.21186	3.92362	4.50096	1.89355	6.25221	6.22691	6.44208	6.61784	5.19026	5.1097
ENSG00000136111.12_3	TBC1D4	chr13:75858801-76056250	-	protein_coding	-0.585662	0.666344	0.000302854	0.00960294	2.65352	3.23918	4.8898	4.2904	5.84183	6.06169	5.86961	4.99965	9.21135	7.19288	9.87192	10.163	7.53707	7.17758
ENSG00000136244.11_3	IL6	chr7:22765503-22771621	+	protein_coding	0.854189	1.80774	0.000784639	0.0180648	2.0275	1.17331	2.87038	3.10055	4.16302	3.74099	1.80727	3.21094	1.60174	1.31621	1.27354	2.07913	0.878296	0.660642
ENSG00000137166.14_2	FOXP4	chr6:41514164-41570122	+	protein_coding	1.03648	2.05122	0.0149369	0.112762	3.47708	2.4406	12.1064	13.8513	11.0104	11.7839	4.25498	11.1394	5.44941	6.45353	6.71826	6.69227	2.21296	1.79123
ENSG00000137193.13_2	PIM1	chr6:37137979-37143202	+	protein_coding	0.902183	1.86889	1.42381e-05	0.00145318	3.89027	2.98809	16.2431	16.4536	11.6179	16.6172	10.5188	12.7942	7.02932	7.22121	6.97864	6.45245	6.37948	7.61301
ENSG00000137331.11_2	IER3	chr6:30710976-30712331	-	protein_coding	1.06251	2.08856	1.08747e-07	9.12268e-05	7.10905	6.04654	153.226	152.74	116.294	127.621	141.427	134.86	62.2377	63.7316	64.8755	65.4703	59.2706	76.1953
ENSG00000137393.9_2	RNF144B	chr6:18387581-18469105	+	protein_coding	-0.919274	0.528775	1.12608e-07	9.12268e-05	2.37863	3.2979	4.57703	4.6991	3.94694	4.76864	3.77149	3.57048	8.87377	9.29485	9.3101	9.37681	8.13471	8.10931
ENSG00000137463.4_3	MGARP	chr4:140187317-140201492	-	protein_coding	-1.05579	0.481035	3.72807e-05	0.00249318	1.72268	2.77847	1.96835	1.26482	3.22119	2.29562	2.42018	3.0412	6.53237	5.0065	6.98426	6.28701	5.6005	5.00488
ENSG00000137502.9_3	RAB30	chr11:82684175-82782965	-	protein_coding	0.736146	1.66572	0.00274472	0.0396575	3.25369	2.51754	8.86279	9.55991	7.50931	9.31982	7.8112	8.34292	5.74643	5.05095	5.53637	5.7777	2.09374	5.29987
ENSG00000137573.13_3	SULF1	chr8:70378859-70573150	+	protein_coding	-0.822613	0.565417	0.000717459	0.0170637	2.36561	3.18822	3.12379	3.92329	3.9889	4.02288	4.83778	5.30906	8.60329	8.80492	9.03023	12.0117	6.05677	5.61289
ENSG00000137801.10_3	THBS1	chr15:39873280-39891667	+	protein_coding	0.912112	1.8818	3.14882e-05	0.0022675	9.82971	8.9176	985.301	987.792	938.099	1011.38	636.94	959.011	485.55	506.933	535.878	557.538	409.994	418.847
ENSG00000137962.12_2	ARHGAP29	chr1:94614544-94740624	-	protein_coding	-0.660368	0.632717	3.75073e-05	0.00249318	3.95978	4.62015	13.4598	13.2164	16.2539	16.2368	14.4846	13.9927	25.7576	24.1904	25.2804	27.1601	18.3748	21.8891
ENSG00000138078.15_3	PREPL	chr2:44543420-44589001	-	protein_coding	-0.633715	0.644515	0.000262699	0.00864501	1.93738	2.5711	2.45519	2.32105	3.62874	2.67982	2.9958	3.04223	5.10726	4.52803	5.36573	6.53437	4.72327	3.75234
ENSG00000138166.5_2	DUSP5	chr10:112257596-112271302	+	protein_coding	-0.907391	0.533148	2.78291e-06	0.00061139	4.1447	5.05209	15.1328	15.2031	15.0131	15.6871	22.4751	17.6767	30.1716	30.3563	32.1922	30.8244	34.7129	35.1642
ENSG00000138356.13_3	AOX1	chr2:201450591-201541787	+	protein_coding	-0.612164	0.654215	2.2003e-05	0.00189169	3.92801	4.54018	13.928	13.1475	12.2422	14.6125	14.9207	16.8903	22.558	21.5009	20.6866	22.5574	26.578	20.24
ENSG00000138411.10_2	HECW2	chr2:197059094-197458416	-	protein_coding	0.734248	1.66353	0.00165833	0.0290084	2.69053	1.95628	4.73682	3.00949	5.93607	6.50668	6.78209	6.76532	3.52351	3.3218	2.13293	2.83295	3.07012	2.57407
ENSG00000138413.13_2	IDH1	chr2:209100951-209130798	-	protein_coding	-0.586417	0.665995	3.25899e-05	0.00230837	3.70595	4.29237	10.8802	10.889	12.5895	13.4341	12.2211	12.4831	16.7936	16.9938	20.5421	22.4093	18.7948	16.7084
ENSG00000138623.9_3	SEMA7A	chr15:74701630-74726808	-	protein_coding	0.648127	1.56713	2.75742e-05	0.002078	1.78456	1.13644	2.07914	2.65928	2.73431	2.48662	1.92994	2.88999	0.898993	1.25002	1.20595	1.47478	1.01562	1.40082
ENSG00000138772.12_3	ANXA3	chr4:79472673-79531605	+	protein_coding	-0.860716	0.550679	6.34211e-06	0.000932466	2.56585	3.42656	4.47774	4.38771	4.40531	4.63296	6.60532	5.30517	9.77384	8.53214	8.90158	9.62898	10.1952	11.7703
ENSG00000139112.10_3	GABARAPL1	chr12:10365057-10375729	+	protein_coding	0.750737	1.68265	0.00855165	0.0789472	3.285	2.53426	6.46881	9.81402	7.63644	9.69905	10.6804	8.83844	4.07806	7.67565	5.21861	3.21984	7.63245	2.78626
ENSG00000139211.6_2	AMIGO2	chr12:47469490-47473734	-	protein_coding	1.06692	2.09495	0.000143311	0.00584151	4.46286	3.39595	20.9537	23.1576	15.4647	19.2902	29.3746	20.3706	9.06082	9.08267	7.38188	8.05667	9.96963	15.1056
ENSG00000139926.15_4	FRMD6	chr14:51955818-52197445	+	protein_coding	0.795133	1.73524	0.00300532	0.041887	5.79794	5.00281	72.6404	44.3796	39.6444	48.0822	60.1708	71.7236	35.4375	33.4476	23.0315	40.5598	22.5322	35.8251
ENSG00000139977.13_4	NAA30	chr14:57857262-57882635	+	protein_coding	0.603941	1.51986	0.00896682	0.0810515	2.71984	2.1159	6.34032	3.39349	4.57854	7.50191	6.23435	6.38853	2.85044	2.33688	3.09763	3.08272	4.59394	4.51622
ENSG00000140092.14_2	FBLN5	chr14:92335756-92414331	-	protein_coding	0.747464	1.67884	0.00718637	0.0702724	5.47587	4.72841	48.5168	49.9895	44.2942	42.1892	29.1856	51.114	37.9987	30.5602	27.2608	29.7577	16.8752	17.1456
ENSG00000140564.11_3	FURIN	chr15:91411822-91426688	+	protein_coding	0.621641	1.53862	0.000419124	0.0116365	5.16335	4.54171	38.4342	38.9333	32.8151	35.9936	26.1873	38.5486	21.8954	23.9767	25.4984	25.7818	19.7593	17.9491
ENSG00000141580.15_3	WDR45B	chr17:80572438-80606429	-	protein_coding	0.848194	1.80025	0.0308572	0.180329	5.07752	4.22933	46.9936	44.5042	16.527	17.9606	43.565	44.8278	33.1155	14.5645	14.9115	13.3243	19.0355	16.9579
ENSG00000142178.7_2	SIK1	chr21:44834395-44847008	-	protein_coding	0.949638	1.93139	0.000737485	0.0173805	2.55532	1.60568	4.82128	5.76544	5.76816	6.27341	2.30414	5.43854	2.34459	2.50131	2.20941	2.46225	1.32795	1.62314
ENSG00000143228.12_3	NUF2	chr1:163236366-163325554	+	protein_coding	-0.599598	0.659938	0.000920624	0.0201233	4.39998	4.99957	18.4545	15.5642	25.5226	24.7656	20.2584	17.9135	27.831	29.443	37.1411	34.8158	27.4299	30.4443
ENSG00000143367.15_3	TUFT1	chr1:151512781-151556059	+	protein_coding	0.684273	1.60689	0.000714151	0.0170162	4.15861	3.47434	18.9593	10.5711	17.3051	20.3152	17.2099	18.7748	9.04792	10.7681	9.43208	9.19981	10.6407	11.8694
ENSG00000143878.9_2	RHOB	chr2:20646835-20649206	+	protein_coding	1.30088	2.46379	6.85796e-07	0.00023884	8.16054	6.85966	281.511	285.394	244.909	241.386	360.715	313.593	109.202	118.68	97.0086	104.733	125.503	140.903
ENSG00000144057.15_3	ST6GAL2	chr2:107418056-107503564	-	protein_coding	1.10223	2.14686	4.43875e-05	0.00276611	1.83223	0.730001	3.00223	3.09372	2.85206	2.82044	1.43555	2.47148	1.07561	0.252865	0.879528	0.889584	0.452429	0.552221
ENSG00000144655.14_2	CSRNP1	chr3:39183346-39196053	-	protein_coding	0.6927	1.61631	0.00380008	0.0478219	3.52291	2.83021	10.4096	10.6073	8.87344	9.62353	12.9066	10.9414	4.60194	5.32031	4.83724	4.91021	8.66296	9.96169
ENSG00000144677.14_2	CTDSPL	chr3:37903451-38025960	+	protein_coding	-0.630022	0.646167	0.027665	0.169068	1.61281	2.24283	1.3743	2.72268	0.981219	1.93787	3.66901	2.40751	3.83788	1.77662	4.35431	3.9828	4.06903	5.18985
ENSG00000144959.9_3	NCEH1	chr3:172348039-172429008	-	protein_coding	-0.597028	0.661115	3.49577e-05	0.00243614	5.32396	5.92099	36.3023	35.2932	42.8735	43.0629	36.4383	41.1582	61.403	59.4798	65.0654	68.9846	53.7061	50.8258
ENSG00000145147.19_4	SLIT2	chr4:20254883-20622184	+	protein_coding	-0.760508	0.590288	0.0130656	0.104155	2.79105	3.55156	6.50228	7.04862	5.54605	7.05165	4.46976	5.31525	14.6629	12.7748	13.465	15.6996	6.47131	5.67379
ENSG00000145425.9_2	RPS3A	chr4:152020725-152025804	+	protein_coding	-0.604486	0.657706	0.0239219	0.153503	7.29913	7.90362	199.536	197.022	114.974	136.817	169.465	140.041	178.831	251.187	181.236	187.625	323.77	371.357
ENSG00000145555.14_4	MYO10	chr5:16662023-16936385	-	protein_coding	0.730834	1.6596	0.0222095	0.146727	4.21838	3.48755	18.4286	19.8342	21.0562	19.1799	9.65404	20.6761	13.2218	12.7364	13.5013	13.3536	6.0711	5.92571
ENSG00000146112.11_2	PPP1R18	chr6:30644166-30655672	-	protein_coding	0.675764	1.59744	0.0472803	0.232315	3.91172	3.23596	20.4235	14.3911	8.95701	18.9151	7.97904	18.7958	6.67883	5.80495	7.07511	16.0709	10.3996	7.51746
ENSG00000146250.6_2	PRSS35	chr6:84222257-84235423	+	protein_coding	-1.12187	0.459498	0.000110469	0.00505974	1.96052	3.08239	2.65783	3.22079	3.06035	3.22259	2.22027	3.07755	8.96416	8.61329	9.37707	8.96193	6.64562	3.8776
ENSG00000146278.10_2	PNRC1	chr6:89790470-89794879	+	protein_coding	-0.686155	0.621508	0.000408264	0.0115292	3.20054	3.8867	7.78927	8.52088	6.38075	7.15899	12.9222	7.60365	14.3901	13.9959	12.5963	14.2097	13.9331	13.6951
ENSG00000146376.10_2	ARHGAP18	chr6:129897277-130031370	-	protein_coding	-0.664905	0.63073	0.0003162	0.00986727	4.63588	5.30078	24.4552	23.3101	24.8184	24.826	22.201	23.6701	44.2467	38.8351	44.6338	45.7693	34.5883	26.4004
ENSG00000146411.5_2	SLC2A12	chr6:134309835-134373774	-	protein_coding	-0.634095	0.644345	2.18708e-06	0.000515434	0.490282	1.12438	0.374341	0.324704	0.581024	0.416713	0.397504	0.348189	1.28645	1.03433	1.31332	1.47779	1.06702	0.948045
ENSG00000147883.10_2	CDKN2B	chr9:22002902-22009362	-	protein_coding	1.21091	2.31484	1.60417e-06	0.000424351	5.21625	4.00534	40.965	42.1265	30.7856	36.4136	32.3084	35.8167	15.8459	16.9824	17.6081	16.7476	11.2814	12.9616
ENSG00000148634.15_3	HERC4	chr10:69681656-69835105	-	protein_coding	-0.646721	0.63873	0.00489374	0.0553997	1.54466	2.19138	1.68826	1.59949	2.59812	1.95376	1.77087	1.99575	4.58005	4.07702	4.1495	4.84174	2.80507	1.79969
ENSG00000149573.8_2	MPZL2	chr11:118124118-118135251	-	protein_coding	-0.607214	0.656463	0.00459933	0.0530869	0.601173	1.20839	0.380166	0.555332	0.97224	0.608217	0.184956	0.51031	1.91142	1.51703	1.41917	1.8139	0.803325	0.692479
ENSG00000150551.10_2	LYPD1	chr2:133402426-133429152	-	protein_coding	-0.76295	0.58929	0.00169537	0.0291705	2.56812	3.33107	5.91915	5.71913	3.70563	5.32794	6.64862	3.10824	7.98115	8.05461	7.71048	8.04285	11.4293	12.0471
ENSG00000151835.14_3	SACS	chr13:23902965-23985652	-	protein_coding	-1.14607	0.451855	0.0354326	0.197964	1.21594	2.362	2.05925	0.843934	0.662635	0.924675	1.92302	1.97751	0.877089	13.007	2.01261	2.70122	7.86331	6.10374
ENSG00000151929.9_2	BAG3	chr10:121410882-121437331	+	protein_coding	0.604575	1.52053	0.00891042	0.080767	5.88898	5.28441	64.1398	67.0775	58.8744	64.2233	38.314	62.6098	39.0482	45.3454	44.9884	46.7346	32.2006	24.9045
ENSG00000152056.16_3	AP1S3	chr2:224616403-224702744	-	protein_coding	-0.74956	0.594785	0.0318199	0.184129	1.70689	2.45645	2.32029	2.23596	2.69128	3.35444	1.29065	2.05982	6.21473	5.52122	7.15454	6.70851	2.07817	2.00311
ENSG00000153714.5_2	LURAP1L	chr9:12775020-12822130	+	protein_coding	-0.596262	0.661466	0.00413629	0.0503897	1.09644	1.6927	1.10129	1.20609	0.697789	1.29742	2.18192	0.661301	2.09381	1.67906	2.26298	2.59233	1.98286	2.93757
ENSG00000154016.13_2	GRAP	chr17:18923986-18950950	-	protein_coding	1.02788	2.03902	2.37972e-06	0.000550821	4.28973	3.26185	19.085	19.9127	15.7657	15.0643	20.723	21.7788	7.23674	8.85328	8.42178	7.66807	9.83296	9.84797
ENSG00000156466.9_2	GDF6	chr8:97154558-97173020	-	protein_coding	1.21229	2.31705	2.22963e-07	0.000137621	4.76386	3.55157	27.0767	27.9218	22.2121	25.692	24.6428	30.1715	9.74149	9.01023	10.7816	11.6158	10.1838	13.5399
ENSG00000157216.15_2	SSBP3	chr1:54691105-54879152	-	protein_coding	0.667543	1.58837	3.62361e-05	0.00248974	3.62587	2.95833	11.1653	12.0671	12.0756	11.498	9.20599	12.3509	6.08977	6.91186	8.81803	6.92693	5.93127	6.28481
ENSG00000157404.15_2	KIT	chr4:55524085-55606881	+	protein_coding	-1.45232	0.365433	1.87547e-05	0.00172245	1.06156	2.51388	0.668833	0.717406	0.807586	1.77201	1.07172	1.7788	3.18229	3.37504	5.6717	5.63464	5.21508	5.89644
ENSG00000157693.14_2	TMEM268	chr9:117373486-117408702	+	protein_coding	0.609772	1.52602	0.0030898	0.0425006	2.14571	1.53593	3.77331	4.42509	3.14202	4.01443	1.98045	3.6837	1.68964	2.69188	1.59841	2.43157	1.54085	1.64272
ENSG00000157870.14_2	FAM213B	chr1:2517930-2522908	+	protein_coding	-0.752137	0.593723	0.00819551	0.0768114	1.7573	2.50943	2.15702	4.0693	1.98011	2.06433	2.06714	2.33016	5.3683	3.77267	2.41574	6.66752	7.34835	4.12814
ENSG00000158290.16_2	CUL4B	chrX:119658464-119709649	-	protein_coding	-0.650699	0.636972	5.10043e-07	0.00021989	3.67975	4.33045	11.2404	11.2197	12.3764	11.8687	11.9039	12.3305	19.3241	18.7593	20.8466	21.6452	17.3944	17.1446
ENSG00000158373.8_3	HIST1H2BD	chr6:26158374-26171577	+	protein_coding	-0.620267	0.650551	0.00472057	0.0541399	2.84216	3.46243	6.41956	5.53311	4.59886	6.01098	9.84497	5.58945	10.4766	8.57697	7.41535	10.6478	13.503	10.4803
ENSG00000158859.9_2	ADAMTS4	chr1:161154098-161168846	-	protein_coding	1.00075	2.00104	9.8759e-08	9.12268e-05	2.68317	1.68242	5.55929	4.85122	4.9756	6.29712	5.12598	5.84669	2.41947	2.22221	2.21602	2.66404	1.84162	1.96343
ENSG00000159216.18_3	RUNX1	chr21:36160098-37376965	-	protein_coding	0.832759	1.78109	0.000412201	0.0116151	3.08422	2.25146	8.87196	7.912	8.73827	7.18378	5.8788	6.71497	4.473	4.56453	4.51541	4.5735	2.68798	2.37598
ENSG00000159261.10_3	CLDN14	chr21:37832919-37948867	-	protein_coding	1.61462	3.06232	1.41336e-07	0.000104188	3.38696	1.77233	10.2945	11.431	7.85938	7.9203	9.76578	9.97105	1.8752	2.4195	2.174	1.98026	2.92089	3.35783
ENSG00000161791.13_2	FMNL3	chr12:50030282-50101948	-	protein_coding	0.786223	1.72455	0.00435137	0.051936	2.30895	1.52273	4.07865	4.37252	5.24661	4.92568	2.35804	3.36501	2.80113	1.55208	1.54656	2.95054	2.09953	0.860403
ENSG00000162430.16_3	SELENON	chr1:26126667-26144715	+	protein_coding	0.702892	1.62776	0.0411092	0.215817	4.70781	4.00492	30.8796	32.7416	32.4535	15.1805	15.0903	32.9998	12.9415	13.7359	31.3577	13.0757	13.0057	12.0667
ENSG00000162458.12_3	FBLIM1	chr1:16083102-16113089	+	protein_coding	0.746444	1.67765	0.024702	0.156343	5.68395	4.93751	52.1395	52.5733	48.1865	45.4733	52.488	52.0363	31.2169	35.4844	10.8603	33.6616	38.5623	42.3127
ENSG00000162493.16_3	PDPN	chr1:13909960-13944452	+	protein_coding	0.630342	1.54793	0.000529071	0.013661	3.57096	2.94062	13.2518	8.99354	9.84297	9.91034	11.5487	12.3236	5.53194	5.85821	7.07576	5.89901	7.08502	9.14801
ENSG00000162511.7_2	LAPTM5	chr1:31205316-31230667	-	protein_coding	0.82852	1.77586	9.23343e-06	0.00118499	3.92567	3.09715	13.5705	14.0311	12.8233	12.5715	15.8199	16.8217	6.576	6.87932	7.67174	6.55806	9.00166	9.03459
ENSG00000162630.5_2	B3GALT2	chr1:193148175-193155784	-	protein_coding	-0.799751	0.574449	1.66647e-05	0.00160005	0.686291	1.48604	0.324068	0.469084	0.661362	0.74206	0.597037	0.930925	1.36442	1.609	2.34224	1.98029	1.77229	1.83612
ENSG00000162692.10_2	VCAM1	chr1:101185298-101204601	+	protein_coding	-0.79001	0.57834	0.000657016	0.0161599	0.244024	1.03403	0.0902887	0.145896	0.251451	0.210179	0.247329	0.169013	1.05641	1.32206	1.60312	1.70285	0.563314	0.403796
ENSG00000162817.6_2	C1orf115	chr1:220863187-220872499	+	protein_coding	-0.975619	0.508521	4.59856e-07	0.00021288	2.50854	3.48416	5.17712	4.37914	4.45762	4.77471	4.86603	4.52714	10.4168	11.6528	11.2836	10.4227	10.2081	7.64301
ENSG00000163347.5_2	CLDN1	chr3:190023490-190040264	-	protein_coding	-1.4932	0.355223	2.06441e-05	0.00182033	1.97105	3.46425	2.67221	2.99451	2.70169	3.43035	3.44556	2.39557	13.405	11.3163	12.603	12.8782	6.55094	6.14659
ENSG00000163565.18_3	IFI16	chr1:158969758-159024945	+	protein_coding	-0.613631	0.65355	0.000531632	0.0136726	4.14202	4.75565	15.5355	19.0059	17.8763	17.8929	14.9661	15.0781	26.5451	25.8999	32.1027	28.6099	26.906	18.1762
ENSG00000163661.3_2	PTX3	chr3:157154578-157161417	+	protein_coding	-0.793838	0.576807	5.99742e-07	0.000227208	7.46925	8.26309	181.702	181.88	153.005	189.719	201.314	154.937	302.804	294.191	307.693	318.159	329.352	287.021
ENSG00000163909.7_2	HEYL	chr1:40089825-40105617	-	protein_coding	0.950073	1.93197	1.86875e-06	0.000465822	1.58298	0.632908	1.95732	2.06927	2.31895	2.29584	1.21862	2.28219	0.470871	0.610883	0.619401	0.452434	0.658914	0.503947
ENSG00000164105.3_2	SAP30	chr4:174291120-174298683	+	protein_coding	-0.731427	0.602308	1.88696e-05	0.00172245	3.25734	3.98876	6.81032	8.99184	8.22509	8.91453	10.6127	8.22247	13.7688	14.1246	14.6445	13.9229	18.2986	14.9095
ENSG00000164221.12_3	CCDC112	chr5:114602885-114632528	-	protein_coding	-0.701897	0.614763	4.35089e-05	0.0027304	2.49071	3.1926	3.55677	4.41407	5.12616	5.51006	4.63246	4.68872	8.9087	6.90764	9.51888	9.1894	7.35026	7.32792
ENSG00000164251.4_3	F2RL1	chr5:76114758-76131140	+	protein_coding	0.733912	1.66314	0.00189377	0.0307606	4.37476	3.64084	19.5251	22.1008	15.104	20.6124	25.0876	17.5189	10.5032	10.12	8.80783	9.99269	13.1116	18.3572
ENSG00000164283.12_3	ESM1	chr5:54273692-54318499	-	protein_coding	1.69909	3.24696	1.81471e-05	0.00170452	4.86369	3.1646	24.9579	21.8237	37.2706	23.6404	27.4822	37.2781	9.39459	8.92192	9.31837	10.5234	3.9597	7.54639
ENSG00000164414.17_3	SLC35A1	chr6:88180341-88222054	+	protein_coding	-0.585157	0.666577	1.23808e-05	0.00136786	2.68438	3.26954	4.82241	5.57049	6.60982	5.33386	4.98797	5.38936	9.09885	7.80268	8.76826	9.93625	8.57436	7.84499
ENSG00000164442.9_2	CITED2	chr6:139692944-139695757	-	protein_coding	-0.800845	0.574013	0.00308149	0.0424916	4.57737	5.37822	24.3002	42.1753	16.816	22.7447	19.9668	18.1114	43.1146	44.1128	45.158	46.4422	33.7078	33.2223
ENSG00000164649.19_3	CDCA7L	chr7:21940518-21985702	-	protein_coding	-0.645315	0.639353	8.82503e-06	0.0011439	3.02013	3.66544	7.66135	8.45111	7.17061	6.87498	6.28287	6.43059	11.5874	12.8968	11.5199	11.7964	12.7441	9.83408
ENSG00000164683.16_3	HEY1	chr8:80676245-80680098	-	protein_coding	0.594761	1.51022	7.00596e-05	0.00366174	2.06648	1.47172	2.85674	4.05907	2.71322	2.6044	3.1166	4.0237	1.59783	1.82141	1.93271	1.73948	1.74137	1.81974
ENSG00000164741.14_4	DLC1	chr8:12940870-13462119	-	protein_coding	0.661676	1.58192	0.0202844	0.139114	4.40583	3.74415	23.9418	24.5258	22.5526	21.9463	11.8027	19.5948	14.984	15.2593	15.2066	16.2371	7.99615	7.86368
ENSG00000164823.9_2	OSGIN2	chr8:90914087-90940116	+	protein_coding	0.825261	1.77186	3.70394e-10	4.0177e-06	5.30484	4.47957	38.9924	40.3568	37.2689	37.4974	36.8007	40.4178	20.4932	21.2261	19.9758	21.7683	22.1329	22.3601
ENSG00000164933.11_3	SLC25A32	chr8:104410863-104427417	-	protein_coding	0.613066	1.52951	1.37168e-05	0.00143385	4.8269	4.21383	30.2807	29.9463	26.6353	29.7212	22.3202	26.273	17.202	18.7549	17.8528	18.2782	18.1482	15.3147
ENSG00000165434.7_2	PGM2L1	chr11:74041363-74109518	-	protein_coding	0.687217	1.61017	1.72917e-05	0.00164805	3.94376	3.25654	14.3923	14.112	15.7664	14.8362	12.8582	14.5135	9.61136	8.45961	8.98773	10.3719	6.79258	7.57571
ENSG00000165617.14_4	DACT1	chr14:59100685-59115039	+	protein_coding	0.947236	1.92817	5.97082e-05	0.0032794	1.3525	0.40526	1.91042	1.8635	0.642474	1.39286	1.99945	1.82188	0.272913	0.270015	0.241943	0.364729	0.284901	0.532313
ENSG00000165801.9_2	ARHGEF40	chr14:21538429-21558399	+	protein_coding	0.819561	1.76487	6.25586e-06	0.000932466	2.03977	1.22021	3.00439	3.24759	3.5866	3.55576	2.11637	3.36321	1.12424	1.23825	1.57409	1.47738	1.37507	1.22079
ENSG00000165886.4_2	UBTD1	chr10:99258625-99330966	+	protein_coding	0.596615	1.51216	0.0193797	0.135157	4.97648	4.37986	32.5381	33.2537	22.0658	25.153	39.4469	33.7373	14.4546	18.1192	16.119	16.6638	31.459	27.0801
ENSG00000166025.17_3	AMOTL1	chr11:94439597-94609918	+	protein_coding	0.767201	1.70196	0.00193323	0.0312061	3.91472	3.14752	13.5679	14.9505	15.6376	16.5203	9.53639	15.489	9.3898	9.11715	9.62654	9.53998	5.54732	5.28099
ENSG00000166503.8_4	HDGFL3	chr15:83781490-83876770	-	protein_coding	0.694014	1.61778	3.19365e-07	0.000165525	4.79947	4.10545	27.4596	26.0396	28.3066	28.3552	23.9715	27.2083	17.2439	16.4787	17.3691	17.0325	14.0722	15.3395
ENSG00000166974.12_3	MAPRE2	chr18:32556892-32723434	+	protein_coding	-0.593899	0.66255	0.00126424	0.0248391	1.50916	2.10306	1.44239	2.2041	1.77602	2.38346	1.60334	1.77962	2.47798	3.23287	2.63061	3.34667	3.55439	4.94266
ENSG00000167034.9_2	NKX3-1	chr8:23536206-23540440	-	protein_coding	0.663982	1.58445	8.90689e-05	0.00444043	1.63162	0.967635	2.13616	2.13657	2.53742	2.45786	1.50031	1.94206	0.596131	1.02863	1.24306	1.14863	0.769489	1.02582
ENSG00000167157.10_2	PRRX2	chr9:132427920-132484953	+	protein_coding	0.716917	1.64367	0.036996	0.202766	3.38925	2.67233	9.51169	10.461	6.87942	6.9031	13.2913	11.3404	3.44952	4.11525	3.79938	3.83444	10.8075	9.76059
ENSG00000167191.11_3	GPRC5B	chr16:19868013-19897489	-	protein_coding	-1.06849	0.476819	1.25058e-06	0.000368409	0.869053	1.93754	0.82624	0.991163	0.825124	0.828891	0.911494	0.600103	3.20496	2.91218	3.1382	3.3772	1.8099	2.77282
ENSG00000167291.15_3	TBC1D16	chr17:77906142-78009647	-	protein_coding	0.717301	1.6441	5.36744e-06	0.000858923	1.89285	1.17555	2.76866	3.12342	2.31742	2.53868	2.30897	3.34559	1.37793	1.0547	1.57373	1.23798	1.22192	1.12401
ENSG00000167657.13_3	DAPK3	chr19:3958451-3971121	-	protein_coding	0.80592	1.74826	0.0186576	0.131649	4.97552	4.1696	48.0398	26.761	19.6781	25.1884	48.8522	25.3874	12.6146	22.1043	12.7262	12.4763	27.4907	19.4892
ENSG00000167767.13_2	KRT80	chr12:52562780-52585784	-	protein_coding	-0.759722	0.59061	5.49931e-05	0.00312017	0.786575	1.5463	0.768623	0.844479	0.665587	0.422652	0.967223	0.73248	2.1156	1.8533	2.62706	2.17561	1.305	1.62997
ENSG00000167772.11_3	ANGPTL4	chr19:8428173-8439257	+	protein_coding	0.979876	1.9723	0.00118566	0.0236598	6.0296	5.04972	52.6934	62.65	61.6329	65.3581	57.8985	91.9001	22.9611	27.1812	26.58	29.343	39.8396	56.2144
ENSG00000168036.16_3	CTNNB1	chr3:41236328-41301587	+	protein_coding	0.627643	1.54504	0.000420837	0.0116365	6.86114	6.2335	120.083	114.029	103.283	109.088	126.162	120.409	64.9299	66.5043	60.1253	72.8712	89.6569	98.6104
ENSG00000168140.4_2	VASN	chr16:4421849-4433529	+	protein_coding	0.883014	1.84422	5.27492e-05	0.00306608	2.69934	1.81633	5.58031	7.40795	4.81947	5.12099	4.25443	6.24986	2.11332	3.05774	2.94963	2.82867	2.5803	1.78986
ENSG00000168209.4_2	DDIT4	chr10:74033678-74035794	+	protein_coding	-0.776084	0.58395	0.00161859	0.0286222	4.46056	5.23665	18.9116	18.2669	16.1425	18.9881	38.0158	21.2112	32.7559	34.2888	35.9635	36.1393	38.4129	43.5754
ENSG00000168461.12_3	RAB31	chr18:9708162-9862548	+	protein_coding	1.09495	2.13606	0.0435986	0.222402	4.94148	3.84653	42.8346	9.48082	17.6255	38.6345	49.8811	47.7808	10.2763	33.6054	12.2873	12.9758	14.1724	7.06012
ENSG00000168497.4_3	CAVIN2	chr2:192699028-192711981	-	protein_coding	-1.27975	0.411866	2.89605e-05	0.00213287	2.22057	3.50032	3.5976	3.35494	3.93213	4.28964	3.55361	3.30943	11.6565	11.9191	14.5463	12.137	7.70721	6.22216
ENSG00000169288.17_2	MRPL1	chr4:78783674-78873944	+	protein_coding	-0.622231	0.649665	0.00214916	0.0335817	4.43608	5.05832	19.8105	26.1909	18.9112	17.5737	23.7132	18.8945	38.8897	26.8895	26.6744	26.1739	42.1492	36.9073
ENSG00000169429.10_2	CXCL8	chr4:74606223-74609433	+	protein_coding	-1.83499	0.280294	0.00010097	0.00483152	2.63718	4.47217	4.57338	4.43879	7.13799	7.66856	4.3806	4.03856	30.5222	28.4075	22.048	31.2115	15.4374	9.56792
ENSG00000169499.14_2	PLEKHA2	chr8:38758753-38831428	+	protein_coding	-0.842807	0.557558	0.00181738	0.0301238	2.37029	3.2131	4.50933	1.85603	5.10386	4.88272	4.063	5.67918	8.14636	6.48815	9.76647	9.87571	7.14463	8.7367
ENSG00000169908.11_3	TM4SF1	chr3:149086809-149095652	-	protein_coding	-0.659832	0.632952	3.46554e-06	0.000680611	5.05958	5.71941	33.4567	29.9222	30.9168	35.0781	36.6265	28.7997	48.922	49.2763	54.8554	58.0097	53.28	46.6435
ENSG00000169991.10_3	IFFO2	chr1:19230775-19283180	-	protein_coding	0.964956	1.952	6.38776e-06	0.000932466	3.20096	2.236	8.2115	7.61526	8.77563	9.14679	6.58489	9.12706	3.84684	3.83996	4.325	4.67981	2.97615	2.87439
ENSG00000170425.3_2	ADORA2B	chr17:15848231-15879060	+	protein_coding	-0.730348	0.602758	0.00080474	0.0183322	2.11287	2.84322	3.06314	3.14012	2.91151	3.99997	4.40267	2.68488	5.16559	5.36219	5.45263	5.29142	7.10697	9.57874
ENSG00000171223.5_2	JUNB	chr19:12902310-12904129	+	protein_coding	1.23789	2.35853	6.38354e-05	0.00344764	5.58825	4.35036	42.336	45.8001	39.5844	38.0132	65.0286	57.4775	15.2591	19.5444	15.6618	17.9437	20.697	30.4889
ENSG00000171522.5_2	PTGER4	chr5:40679600-40693837	+	protein_coding	-1.12542	0.45837	0.000413992	0.0116279	1.87984	3.00525	2.32326	2.17916	2.70102	4.19866	2.42439	2.56988	6.03624	13.2282	7.18105	7.81073	5.69082	4.54932
ENSG00000171552.12_3	BCL2L1	chr20:30252255-30311792	-	protein_coding	-0.674997	0.626334	0.000743754	0.0174834	4.68516	5.36016	24.8002	24.447	21.8164	21.8024	33.6129	23.5199	33.7911	35.3403	34.4301	39.3839	49.8238	51.2282
ENSG00000171621.13_2	SPSB1	chr1:9352939-9429591	+	protein_coding	1.40832	2.65427	2.82968e-09	9.16957e-06	4.52033	3.11201	21.7313	20.9568	20.931	21.3841	26.4146	20.7445	7.59926	8.10001	7.81622	7.91189	6.32462	8.27496
ENSG00000172057.9_3	ORMDL3	chr17:38077294-38083854	-	protein_coding	-1.08753	0.470566	0.00185174	0.0304272	1.96349	3.05102	2.47132	2.24728	2.29782	2.53554	6.82407	2.42203	5.1561	8.81527	6.59242	9.78167	4.95575	10.0022
ENSG00000172935.8_2	MRGPRF	chr11:68771863-68780877	-	protein_coding	-0.690379	0.619691	0.00160542	0.0285061	0.884382	1.57476	0.827766	0.755242	0.663943	0.664972	1.60626	0.708169	1.40964	2.00125	1.43661	1.81622	3.24507	2.3167
ENSG00000173145.11_2	NOC3L	chr10:96092983-96122716	-	protein_coding	-0.58827	0.66514	0.000684285	0.0164864	2.94356	3.53183	5.62426	5.93727	8.62427	6.61937	7.01461	6.67552	11.6436	9.22366	12.6333	12.7351	9.32604	8.57815
ENSG00000173221.13_2	GLRX	chr5:95087023-95158709	-	protein_coding	-0.688816	0.620363	0.00420658	0.0509504	1.8905	2.57932	2.34852	3.24403	2.06304	2.98915	2.80245	2.93419	4.18862	3.83955	4.21932	3.61875	7.92165	7.43857
ENSG00000173281.4_2	PPP1R3B	chr8:8993765-9009084	-	protein_coding	0.585936	1.50101	6.53377e-05	0.00347339	2.92424	2.3383	6.60953	7.76305	5.70014	7.67659	5.60349	6.4728	3.92021	4.18381	4.58409	4.41001	3.30246	4.04541
ENSG00000173801.16_3	JUP	chr17:39910856-39943183	-	protein_coding	0.694517	1.61834	0.00051072	0.013395	2.59905	1.90454	5.57445	5.79173	5.31014	3.79423	4.13593	6.13085	2.85524	3.34011	3.31261	3.16104	1.9822	2.07541
ENSG00000175592.8_3	FOSL1	chr11:65659520-65668044	-	protein_coding	-0.687289	0.62102	0.0036912	0.0472202	5.51245	6.19974	40.8536	46.6854	47.5063	53.4257	33.7066	48.47	75.582	91.3287	87.6084	87.7599	58.2484	46.8641
ENSG00000175727.9	MLXIP	chr12:122516628-122631894	+	protein_coding	0.81404	1.75813	0.027139	0.16658	3.4464	2.63236	11.48	12.159	11.5774	10.9947	5.08632	10.1287	6.93231	6.68614	7.70027	7.78408	2.36371	2.6254
ENSG00000176170.13_2	SPHK1	chr17:74372665-74383941	+	protein_coding	0.824371	1.77076	0.00911347	0.0819201	3.80483	2.98046	13.1545	13.2787	11.0197	9.99451	17.6792	13.9347	4.31643	5.8934	4.46366	6.77578	9.70309	13.503
ENSG00000176454.13_3	LPCAT4	chr15:34650819-34659479	-	protein_coding	-1.07211	0.475624	9.59408e-06	0.00119421	1.62726	2.69936	2.10973	1.75088	2.38678	1.63248	2.73938	2.04769	6.48153	5.09702	6.71774	6.60178	4.17053	4.42608
ENSG00000176485.11_3	PLA2G16	chr11:63340667-63384355	-	protein_coding	-0.60626	0.656898	0.000213439	0.00762808	4.05621	4.66247	18.1574	15.4884	11.9933	15.0423	19.8361	14.45	22.4452	23.9795	22.9944	23.3957	26.2712	27.2159
ENSG00000176641.10_3	RNF152	chr18:59475296-59561480	-	protein_coding	1.08536	2.1219	3.6349e-06	0.000699413	2.94374	1.85838	8.12859	7.24317	6.66559	6.37	5.51189	6.49394	3.29747	2.84161	2.92539	3.05611	1.89768	1.98406
ENSG00000177885.13_3	GRB2	chr17:73314157-73401790	-	protein_coding	-0.771014	0.586006	0.0239209	0.153503	3.20053	3.97155	8.75559	7.38241	6.53742	7.35242	9.15478	10.5455	11.8792	12.7147	8.023	25.6974	27.9591	11.0963
ENSG00000178573.6_2	MAF	chr16:79619740-79634611	-	protein_coding	1.1196	2.17286	1.37672e-06	0.000379681	2.13836	1.01877	4.06875	4.00241	3.48007	3.37406	2.59352	3.07853	1.12515	1.2394	1.30762	1.15858	0.72232	0.694775
ENSG00000178726.6_2	THBD	chr20:23026270-23030378	-	protein_coding	-0.641886	0.640875	7.38484e-05	0.00378349	4.50057	5.14245	19.0312	19.3138	21.4112	22.4271	24.6841	23.5182	36.9091	37.7288	37.2133	38.1825	27.6703	29.8092
ENSG00000179772.7_2	FOXS1	chr20:30432104-30433422	-	protein_coding	2.15462	4.45252	8.84049e-09	1.73711e-05	3.84459	1.68997	12.899	14.143	11.8807	12.3908	16.921	12.512	2.05191	2.07946	2.45453	2.04332	1.61172	3.37202
ENSG00000180801.13_3	ARSJ	chr4:114821440-114900883	-	protein_coding	-0.713034	0.610036	5.01955e-07	0.00021989	4.08059	4.79363	15.5722	16.6899	16.8543	16.0298	15.9981	14.4819	27.625	26.1285	27.6093	31.1319	23.4363	25.0916
ENSG00000181104.6_2	F2R	chr5:76011868-76031606	+	protein_coding	0.753396	1.68576	0.000119283	0.00524119	5.84117	5.08777	54.7421	56.1176	51.3523	55.4795	63.6535	57.3219	29.6415	28.2906	29.1001	30.3686	36.1672	48.1103
ENSG00000183386.9_2	FHL3	chr1:38462442-38471278	-	protein_coding	0.925534	1.89939	2.79511e-07	0.000157523	4.27217	3.34664	19.0764	18.8022	15.8245	18.4256	19.2543	18.7732	7.9319	8.76294	9.53293	8.42219	9.45472	11.2487
ENSG00000183496.5_2	MEX3B	chr15:82334119-82338482	-	protein_coding	0.79391	1.73377	0.00161049	0.028518	3.77351	2.9796	13.4406	14.8742	13.0983	13.7601	8.47984	13.4643	8.12457	7.59493	7.92103	9.45998	4.80002	4.67363
ENSG00000183688.4_3	RFLNB	chr17:289769-295730	-	protein_coding	0.741781	1.67224	2.47906e-06	0.000563747	4.50342	3.76164	22.1111	23.0161	21.9561	19.4758	20.502	23.2686	11.3021	12.6381	11.6666	11.9333	12.3818	15.9271
ENSG00000184226.14_3	PCDH9	chr13:66876966-67804577	-	protein_coding	0.857362	1.81172	8.69309e-07	0.000274829	3.47071	2.61335	11.1027	11.5142	10.5075	9.9075	8.32281	9.47585	6.12237	5.2364	4.78822	5.19643	4.62132	4.86262
ENSG00000184979.9_2	USP18	chr22:18632666-18660164	+	protein_coding	-0.627857	0.647137	0.000938087	0.0203603	3.45216	4.08002	9.29217	11.1958	8.19594	9.29442	12.7928	9.48704	15.0577	11.9662	14.7171	15.9501	20.7101	18.4331
ENSG00000185298.12_2	CCDC137	chr17:79633394-79640934	+	protein_coding	0.723777	1.6515	0.0479706	0.233933	3.7705	3.04673	12.2912	14.7902	11.9473	13.4623	10.9128	12.7983	3.00462	11.1587	7.79071	11.0758	12.6612	3.50877
ENSG00000185418.15_3	TARSL2	chr15:102193801-102264807	-	protein_coding	0.781527	1.71895	1.76598e-07	0.000114453	3.96994	3.18841	14.6851	14.7246	14.477	16.0056	13.4786	14.7527	7.48571	7.67389	9.77222	7.48202	8.42312	8.05624
ENSG00000185551.14_3	NR2F2	chr15:96869167-96883492	+	protein_coding	-0.598376	0.660497	0.0314551	0.183081	4.24599	4.84437	23.5643	17.5693	14.0259	23.2877	13.6774	18.1006	33.6391	33.1225	34.9499	37.2612	17.0495	18.1543
ENSG00000185860.13_3	CCDC190	chr1:162794248-162838605	-	protein_coding	-0.628126	0.647016	0.000150356	0.00605251	0.71729	1.34542	0.731484	0.457482	0.704429	0.687162	0.749187	0.555827	2.16941	1.72233	1.73982	0.940604	1.37973	1.4658
ENSG00000186174.12_2	BCL9L	chr11:118764584-118796317	-	protein_coding	1.1428	2.20809	0.044946	0.226865	3.54554	2.40274	9.82984	14.4987	14.164	14.9088	3.07783	14.349	6.91468	7.44916	5.71494	8.15703	1.6427	1.01226
ENSG00000188223.9_4	AD000671.1	chr19:36236579-36245420	+	protein_coding	-1.16459	0.446091	0.0234762	0.151997	0.54147	1.70606	0	1.10955	1.06932	0	0	1.17758	2.29302	3.38186	4.04552	0	4.20784	2.18154
ENSG00000188487.11_2	INSC	chr11:15133970-15268754	+	protein_coding	-0.622401	0.649589	0.00343519	0.0456696	2.17492	2.79732	3.04383	3.1119	3.5845	2.27494	4.51129	5.16178	5.02336	5.54086	4.92518	6.2417	8.04193	6.38215
ENSG00000188641.12_3	DPYD	chr1:97543299-98386605	-	protein_coding	-0.647138	0.638546	0.000222039	0.00784055	2.13081	2.77794	3.27843	2.65529	3.73611	2.71901	4.11698	4.00668	6.31314	5.26737	5.74302	6.58926	6.90552	4.61428
ENSG00000189057.10_3	FAM111B	chr11:58874658-58894883	+	protein_coding	-0.588621	0.664978	0.0465507	0.230315	2.69373	3.28235	3.16618	6.40105	8.75554	4.31672	5.42846	6.13394	6.60158	13.0283	13.906	6.29491	8.97611	6.33276
ENSG00000189060.5_2	H1F0	chr22:38201100-38203443	+	protein_coding	-0.589666	0.664497	0.00030016	0.00955941	6.00804	6.59771	56.9886	54.9364	67.7699	54.6083	69.9555	79.731	96.5877	98.1648	101.572	101.417	102.241	77.6394
ENSG00000189114.6_3	BLOC1S3	chr19:45682003-45685059	+	protein_coding	0.735545	1.66503	0.00153483	0.0276736	2.99144	2.25589	6.87455	7.58092	6.29817	6.86457	6.14565	8.12814	4.21493	5.2786	4.19258	4.91974	2.08731	2.82093
ENSG00000189152.10_3	GRAPL	chr17:19030782-19062489	+	protein_coding	0.67333	1.59475	0.000200185	0.0073716	2.0608	1.38747	3.15255	3.62967	2.55097	2.80083	3.64137	3.37964	1.38823	1.60559	1.30757	1.17578	2.3131	2.09766
ENSG00000189221.9_2	MAOA	chrX:43514155-43606071	+	protein_coding	-0.845828	0.556391	9.53187e-06	0.00119421	1.99105	2.83687	2.62506	3.27771	2.5372	2.43725	3.33464	3.82877	7.04492	6.25898	4.98793	5.98674	6.95904	5.84061
ENSG00000196072.11_3	BLOC1S2	chr10:102033037-102046469	-	protein_coding	0.588496	1.50368	3.87498e-08	4.56613e-05	4.97139	4.3829	32.423	28.3225	32.7221	29.5903	29.7402	29.6745	20.335	19.3655	19.131	19.2233	21.217	19.985
ENSG00000196747.4_2	HIST1H2AI	chr6:27775977-27776479	+	protein_coding	-0.943708	0.519895	0.00053761	0.013799	1.52654	2.47025	3.39167	1.25833	1.20413	1.848	2.91167	1.34772	3.93459	4.33807	3.98027	5.19373	4.40783	5.58936
ENSG00000197061.4_2	HIST1H4C	chr6:26104104-26104538	+	protein_coding	-0.802046	0.573535	0.0235966	0.152625	4.91166	5.7137	33.1259	28.5914	24.004	24.9244	46.8875	22.7219	42.5581	43.2356	36.6052	33.8421	96.6635	83.7331
ENSG00000197183.14_4	NOL4L	chr20:31030862-31172876	-	protein_coding	0.892032	1.85579	0.0356552	0.198609	3.24069	2.34865	9.44266	10.4621	11.8876	10.0566	3.29508	8.73692	5.79217	5.69833	6.1701	6.12807	1.69093	1.79072
ENSG00000197312.11_3	DDI2	chr1:15943995-15995539	+	protein_coding	0.662071	1.58235	4.74172e-05	0.0029129	2.67746	2.01539	5.26189	5.2577	6.30509	6.0784	4.52793	5.11978	3.10579	2.93309	3.71014	3.64481	2.40852	2.62628
ENSG00000197442.9_2	MAP3K5	chr6:136878185-137113656	-	protein_coding	-0.679029	0.624585	0.00133125	0.025526	2.2726	2.95162	4.24778	4.18003	4.59119	3.79036	3.18814	3.17364	8.07133	7.86046	7.928	8.01173	5.08066	4.45161
ENSG00000197461.13_3	PDGFA	chr7:536895-559933	-	protein_coding	0.995507	1.99378	6.21268e-05	0.0033694	2.64783	1.65232	4.39936	4.11305	6.63857	4.93258	5.26483	6.73152	2.25726	2.12836	2.23549	2.72702	1.18833	2.5876
ENSG00000197632.8_3	SERPINB2	chr18:61538926-61571124	+	protein_coding	-0.920307	0.528397	1.30163e-06	0.000374928	1.66636	2.58666	2.04858	2.07688	1.77921	2.48817	2.88258	1.89661	4.85339	4.64678	5.02118	4.42213	5.24358	5.97405
ENSG00000198053.11_2	SIRPA	chr20:1874813-1921238	+	protein_coding	0.759535	1.69294	0.000225669	0.00788442	6.00706	5.24753	69.5773	73.8881	64.3207	67.8292	42.2398	67.8727	36.6919	39.6176	41.605	40.9987	32.5218	31.7332
ENSG00000198121.13_3	LPAR1	chr9:113635543-113800738	-	protein_coding	-0.664185	0.631045	2.19863e-05	0.00189169	4.15582	4.82001	19.7305	15.3969	14.1064	16.7645	19.9092	15.8165	28.9483	29.0304	29.1888	24.842	24.6654	27.2063
ENSG00000204217.13_3	BMPR2	chr2:203241659-203432474	+	protein_coding	0.669474	1.59049	0.00554355	0.059881	5.27508	4.60561	37.4304	36.7653	42.3299	40.2848	30.2858	40.501	30.9598	26.2295	27.2722	29.4688	16.7102	14.6848
ENSG00000204381.11_3	LAYN	chr11:111411005-111432470	+	protein_coding	-0.605793	0.65711	0.00797104	0.0755268	2.34247	2.94827	3.85004	2.87891	3.39451	4.21052	6.26642	4.43706	5.36646	5.07475	5.89009	6.89997	8.29464	9.80423
ENSG00000204634.12_3	TBC1D8	chr2:101624079-101869328	-	protein_coding	-0.884164	0.541801	3.98199e-06	0.000737352	1.78084	2.665	2.17721	1.93605	3.1757	2.93991	2.58601	1.99146	5.10276	5.43829	5.846	5.73461	5.47192	4.55134
ENSG00000205413.7_3	SAMD9	chr7:92728826-92747336	-	protein_coding	-0.609342	0.655496	0.000163416	0.00639939	1.92393	2.53327	2.23684	2.44816	2.83409	3.03846	3.18293	3.12948	5.95847	4.97291	4.55761	5.0483	4.97264	3.50979
ENSG00000205595.3	AREGB	chr4:75480629-75490486	+	protein_coding	-0.915122	0.530299	1.54579e-05	0.00155322	0.978376	1.8935	0.597539	0.784154	1.24719	1.13769	1.33474	0.829857	2.11261	2.2441	2.72271	3.09509	2.9005	3.38063
ENSG00000213160.9_4	KLHL23	chr2:170550998-170633499	+	protein_coding	-0.635743	0.643609	0.00654332	0.0665369	0.9733	1.60904	1.03811	0.446292	0.560757	1.26654	1.332	1.35529	2.50384	2.12032	2.76088	2.64924	1.56327	1.09504
ENSG00000213859.4_2	KCTD11	chr17:7255208-7258263	+	protein_coding	0.600616	1.51636	0.000194904	0.00725554	3.28987	2.68925	7.24395	9.34322	7.84989	8.28973	9.73214	10.6326	4.77851	5.21164	4.92779	5.24799	5.6712	7.11736
ENSG00000224982.3_2	TMEM233	chr12:120031264-120080871	+	protein_coding	0.721775	1.64921	9.67073e-06	0.00119421	2.262	1.54022	4.05915	3.70169	3.5542	3.45731	4.79817	3.34977	1.91531	2.1355	1.52239	1.64171	1.96859	2.34718
ENSG00000228144.2_4	AC078927.1	chr12:66517697-66563765	-	protein_coding	0.600735	1.51649	0.03817	0.207186	0.800015	0.19928	0.648867	0	0.320377	1.3988	1.62539	1.0319	0.561671	0	0	0.466717	0	0
ENSG00000239697.10_3	TNFSF12	chr17:7452208-7461207	+	protein_coding	-0.595321	0.661897	0.0351423	0.196852	1.71733	2.31265	3.35391	1.50713	3.03684	1.13937	1.86082	3.68731	2.59346	2.70321	5.64612	3.86055	4.87651	4.95101
ENSG00000244045.12_3	TMEM199	chr17:26684604-26690705	+	protein_coding	0.707139	1.63256	0.0417398	0.217107	2.68077	1.97363	7.55173	7.67805	7.10751	2.9143	3.02651	6.32832	2.44848	2.71085	1.80428	2.98966	2.3278	6.70396
ENSG00000253368.3_3	TRNP1	chr1:27320198-27327389	+	protein_coding	-0.641156	0.641199	0.0233381	0.151481	3.55223	4.19338	9.34804	7.89985	8.81123	9.78022	19.5763	12.0018	14.1667	15.3599	13.8058	14.4643	22.241	27.3998
ENSG00000254788.7_4	CKLF-CMTM1	chr16:66586490-66613038	+	protein_coding	-0.756553	0.591909	0.00652241	0.066465	0.692014	1.44857	0.33778	0.763042	1.07417	0.339895	0.304324	1.07947	1.05476	2.97139	0.818984	2.02775	2.46368	1.65571
ENSG00000257093.6_3	KIAA1147	chr7:141356528-141401953	-	protein_coding	1.05494	2.07763	4.99504e-06	0.000830073	2.52655	1.47161	4.60389	5.25849	5.75767	4.97405	3.6126	4.60311	2.18217	1.94627	1.70921	2.33534	1.29179	1.34338
ENSG00000258659.6_3	TRIM34	chr11:5640994-5665628	+	protein_coding	-0.824804	0.564559	0.000138135	0.00568415	1.21792	2.04273	1.27682	1.36915	1.52445	1.89368	0.576622	1.5499	2.60747	2.61108	3.14846	3.29582	3.53026	3.65199
ENSG00000275126.1_2	HIST1H4L	chr6:27840977-27841288	-	protein_coding	-0.715673	0.608921	0.0119135	0.098171	0.907572	1.62324	1.44941	0	0.844282	1.75048	0.710779	1.04997	2.01098	1.92178	1.74583	1.52956	3.17727	2.34893
ENSG00000278272.1_2	HIST1H3C	chr6:26045639-26046049	+	protein_coding	-0.740134	0.598684	0.00282023	0.0403041	1.34925	2.08938	1.01363	1.68666	1.09182	1.18971	2.94921	1.7949	2.87638	3.60609	2.49614	2.90813	3.01098	5.07055
ENSG00000283149.1_3	AC068631.2	chr3:186299784-186314892	+	protein_coding	-0.657636	0.633916	0.00860028	0.0791739	0.491737	1.14937	0.729197	0.924116	0	0.452213	0	0.599777	1.83624	1.25801	0.933334	1.77275	0.766647	0.963982

## Sheet: hCMEC-D3 - Flow vs Static
#log2FC >= 0.585 #p-value cut-off <= 0.05 #q-value cut-off <= 1.00 #Gene biotype: protein_coding #Condition pair: up_BF_vs_BS Column A: Track_id, The database name in gene level. Column B: Gene_Name, The name of gene. Column C: Locus, The genomic coordinates of gene. Column D: Strand, Strand of the gene. Column E: Gene_Type, The biological type of gene. Column F: log2FC, if the comparison is test…
Annotation					DE Statistic				FPKM
Track_id	Gene_Name	Locus	Strand	Gene_Type	log2FC	Fold_Change	p_value	q_value	BF_FPKM	BS_FPKM	BFA	BFB	BFC	BFD	BFE	BFF	BSA	BSB	BSC	BSD	BSE	BSF
ENSG00000000971.15_2	CFH	chr1:196621008-196716634	+	protein_coding	-0.761825	0.58975	0.00288363	0.0296411	3.47128	4.23311	10.845	10.5613	12.7543	9.57143	9.87774	7.59231	22.8548	17.5005	26.8277	18.4953	12.1004	13.1027
ENSG00000005249.12_2	PRKAR2B	chr7:106685094-106802256	+	protein_coding	-1.01023	0.496469	6.87777e-07	9.46599e-05	2.29645	3.30668	3.36235	4.17314	3.14687	3.97819	5.16454	3.89374	9.70374	9.32895	9.05388	7.84438	8.32932	9.23329
ENSG00000006451.7_3	RALA	chr7:39663082-39747723	+	protein_coding	0.700778	1.62538	5.96211e-05	0.00195577	5.85724	5.15646	52.5651	66.8825	51.9067	51.8414	63.5753	56.8145	34.6043	34.9131	30.6871	28.2576	40.1353	41.209
ENSG00000006534.15_2	ALDH3B1	chr11:67776048-67796749	+	protein_coding	-1.15241	0.449872	1.52885e-05	0.000803509	1.40087	2.55329	2.01666	1.40571	1.85112	1.19482	1.7036	1.76123	6.00179	6.28577	6.11977	4.28794	3.89084	3.35387
ENSG00000007944.14_2	MYLIP	chr6:16129356-16148479	+	protein_coding	-0.879924	0.543396	8.63255e-07	0.000112871	1.22288	2.1028	0.895564	1.53151	1.16381	1.42471	1.45627	1.61493	3.3106	2.95522	3.57588	3.6626	3.37705	2.94495
ENSG00000010438.16_3	PRSS3	chr9:33750464-33799229	+	protein_coding	0.600488	1.51623	0.0240822	0.1259	4.26801	3.66752	12.5614	17.9843	15.4921	17.2573	22.8434	26.6697	8.71175	10.7565	9.94867	9.43246	19.3365	14.8707
ENSG00000013588.7_3	GPRC5A	chr12:13043716-13070871	+	protein_coding	-1.37119	0.386574	1.67247e-08	1.06805e-05	2.28067	3.65186	4.11002	3.96678	3.44797	3.32964	3.93484	4.45655	11.9154	13.0367	12.7957	12.2146	9.58051	10.278
ENSG00000018408.14_3	WWTR1	chr3:149235022-149454501	-	protein_coding	0.594266	1.5097	0.000573324	0.00956149	5.25959	4.66533	36.3105	44.2987	33.9704	41.6822	40.9138	28.8917	24.5846	25.5284	25.4546	23.3729	19.1724	29.2388
ENSG00000019549.9_2	SNAI2	chr8:49830327-49834299	-	protein_coding	1.10881	2.15667	1.63906e-07	3.8269e-05	4.1136	3.00479	18.5178	16.9599	18.067	17.5562	14.8349	12.7019	7.07872	6.80825	6.4409	6.75535	7.54608	7.59618
ENSG00000023445.13_2	BIRC3	chr11:102188181-102210134	+	protein_coding	-0.896337	0.537249	0.00134399	0.0174166	2.89437	3.7907	8.21077	4.71998	11.3772	5.27276	6.5124	4.49791	14.2414	12.3731	16.3156	12.8049	11.5458	10.4938
ENSG00000026036.21_3	RTEL1-TNFRSF6B	chr20:62290653-62330037	+	protein_coding	-0.914231	0.530627	0.019029	0.108095	0.717726	1.63196	0.82486	0.460418	1.36015	0.397588	0.307029	0.721994	0.986753	2.43075	3.50608	3.60396	3.54662	0.378653
ENSG00000026508.17_4	CD44	chr11:35160417-35253949	+	protein_coding	0.624003	1.54114	2.94105e-06	0.000268911	5.41977	4.79577	41.3625	44.5284	39.3177	42.1257	44.9639	38.918	28.0466	29.2917	23.4595	23.994	26.8231	29.684
ENSG00000027697.13_3	IFNGR1	chr6:137518621-137540586	-	protein_coding	-0.69893	0.616029	0.0011328	0.0155092	5.62475	6.32368	35.4807	41.8798	49.4147	53.0637	59.7234	54.7406	65.3516	63.0944	81.9747	76.8299	97.7702	96.3441
ENSG00000027869.11_3	SH2D2A	chr1:156776035-156786654	-	protein_coding	0.946828	1.92763	5.31726e-06	0.000399559	1.91515	0.96832	4.04424	2.52025	2.95225	2.54942	2.1475	2.67084	0.983382	1.22538	0.98415	0.937777	0.681192	0.966321
ENSG00000028137.18_3	TNFRSF1B	chr1:12227060-12269285	+	protein_coding	-0.95967	0.514174	5.13055e-07	7.74502e-05	1.30681	2.26648	1.47948	1.68431	1.52739	1.73854	1.32259	1.14275	3.99843	3.78415	4.59101	4.07976	3.03126	3.53163
ENSG00000030419.16_3	IKZF2	chr2:213864415-214017151	-	protein_coding	-1.06974	0.476406	9.68131e-06	0.000608573	1.52457	2.5943	2.05258	1.97154	1.08864	2.48358	2.13054	1.74464	5.57354	4.67248	6.18009	5.57149	3.96915	4.54792
ENSG00000031081.10_4	ARHGAP31	chr3:119013220-119139561	+	protein_coding	0.630026	1.54759	0.00699263	0.0538132	2.44321	1.81318	5.51683	5.42041	4.82287	5.67236	3.63368	2.43501	3.13281	2.88528	2.96907	2.72512	1.68613	1.95329
ENSG00000043143.20_2	JADE2	chr5:133860003-133918920	+	protein_coding	-0.772032	0.585592	7.72696e-06	0.000515459	1.80159	2.57362	3.0828	2.54625	2.62918	2.2194	2.33648	2.17972	5.3283	6.08743	5.35177	4.82437	4.07939	4.28062
ENSG00000048162.20_3	NOP16	chr5:175810941-175815976	-	protein_coding	0.604838	1.52081	1.74703e-06	0.000191953	4.33551	3.73068	18.3702	19.0907	19.5691	21.6406	19.1477	17.5464	11.9844	13.3004	10.4592	12.9524	12.43	12.7285
ENSG00000049759.17_3	NEDD4L	chr18:55711599-56068772	+	protein_coding	-0.651006	0.636836	2.47313e-06	0.000248222	1.51861	2.16962	1.95021	1.75846	1.82693	1.51766	2.23739	1.95023	3.564	3.67765	3.0906	4.0386	3.10666	3.58942
ENSG00000050344.8_2	NFE2L3	chr7:26191860-26226745	+	protein_coding	-1.06283	0.478692	1.06801e-06	0.000132993	3.55263	4.61546	9.87977	9.15334	10.8284	9.65282	13.7111	11.7477	28.8883	23.8639	22.4301	21.9658	21.2415	23.393
ENSG00000057019.15_3	DCBLD2	chr3:98514785-98620533	-	protein_coding	-0.611282	0.654615	3.79064e-06	0.000321835	4.88472	5.496	31.9528	25.9592	29.973	25.7409	30.3035	27.8618	49.4123	44.7029	47.089	40.5899	41.3995	42.2401
ENSG00000057294.14_3	PKP2	chr12:32943679-33049774	-	protein_coding	-0.740393	0.598576	1.1372e-05	0.000680569	3.02952	3.76992	7.36471	6.30949	7.56414	6.20432	8.1031	7.63103	12.3511	13.9959	15.5815	12.0296	10.7882	11.6374
ENSG00000058085.14_2	LAMC2	chr1:183155373-183214035	+	protein_coding	1.24728	2.37393	5.8998e-07	8.29461e-05	2.74533	1.49805	7.04654	5.01473	7.54562	5.59542	5.37009	4.23121	1.8905	2.03068	1.80315	1.6407	1.70561	1.89474
ENSG00000058804.11_2	NDC1	chr1:54231133-54304533	-	protein_coding	-0.645101	0.639448	2.91229e-08	1.31237e-05	4.43002	5.07513	21.959	19.6412	18.8886	19.555	22.3421	21.1857	33.1569	33.2717	33.9206	31.9193	31.3705	32.6895
ENSG00000060642.10_3	PIGV	chr1:27113963-27124889	+	protein_coding	-0.638831	0.642233	0.00218273	0.0244677	1.17141	1.81024	1.19936	1.72715	0.906603	1.13521	0.934221	1.76412	3.46877	2.27482	1.88471	2.03431	2.11029	3.66957
ENSG00000065809.13_3	FAM107B	chr10:14560556-14816896	-	protein_coding	-0.807357	0.571428	8.61123e-06	0.000560158	3.65973	4.46708	9.24888	12.7616	10.2403	12.2451	14.1149	11.8394	24.1262	20.797	19.1424	19.1132	21.7185	22.2199
ENSG00000069702.10_2	TGFBR3	chr1:92145900-92371892	-	protein_coding	-0.937553	0.522118	2.2175e-06	0.000228673	2.06754	3.00509	3.58971	3.37794	3.30831	3.38016	3.27771	2.3441	7.2861	7.81762	8.21849	7.06935	5.61623	6.44597
ENSG00000070087.13_3	PFN2	chr3:149682691-149768575	-	protein_coding	-0.694796	0.617797	0.0172897	0.101146	3.39913	4.09392	7.18862	8.11295	8.26524	8.42979	11.9018	15.3892	12.9878	13.564	12.731	12.4177	25.6468	23.7916
ENSG00000070214.15_2	SLC44A1	chr9:108006903-108201452	+	protein_coding	-0.601562	0.65904	0.00122778	0.0163975	3.8025	4.40406	10.0584	13.6968	16.646	14.7831	10.9965	12.5892	22.9388	21.8627	22.1524	18.0874	21.7911	15.3379
ENSG00000070404.9_3	FSTL3	chr19:676365-683399	+	protein_coding	1.03704	2.05201	3.13773e-08	1.32342e-05	5.46169	4.42465	43.9801	43.2347	44.7107	38.4359	40.0059	48.8037	19.2274	20.7824	19.79	24.1018	19.2255	20.0967
ENSG00000070614.14_3	NDST1	chr5:149865381-149937773	+	protein_coding	0.593164	1.50855	0.00783046	0.0578904	3.73254	3.13938	14.6708	14.7961	13.7686	13.9055	10.2164	8.02535	8.68445	9.39816	8.86786	8.80285	5.17997	6.77479
ENSG00000071051.13_3	NCK2	chr2:106361354-106510730	+	protein_coding	-0.634926	0.643974	0.03154	0.151278	2.10832	2.74324	1.87344	4.73553	3.62155	2.92167	2.57151	5.02444	6.65856	2.80497	6.74381	8.24365	4.52414	6.82047
ENSG00000071242.11_3	RPS6KA2	chr6:166822852-167319939	-	protein_coding	-0.606076	0.656981	0.00201099	0.0231867	3.79804	4.40411	15.6218	13.4943	15.7691	12.3688	11.2621	9.93696	22.0832	22.2437	24.8438	21.7094	15.2218	16.6343
ENSG00000071282.11_2	LMCD1	chr3:8543393-8616359	+	protein_coding	1.37398	2.59184	1.07372e-09	1.91136e-06	2.61928	1.2453	4.83913	4.89565	4.75767	5.10417	5.39793	5.95174	1.07903	1.31934	1.28953	1.41578	1.58792	1.57188
ENSG00000071967.11_2	CYBRD1	chr2:172378757-172414643	+	protein_coding	-1.02792	0.490416	0.0275154	0.137821	2.73508	3.76301	4.00606	4.61947	5.59563	7.93542	6.50612	5.99966	28.0223	7.58761	9.75599	5.54301	10.5427	29.9263
ENSG00000072210.18_3	ALDH3A2	chr17:19551449-19580911	+	protein_coding	-0.675965	0.625913	4.73262e-05	0.00169997	2.1047	2.78067	2.68772	2.87999	3.27806	3.34106	4.15882	3.61834	7.07713	5.25685	5.9263	5.53916	6.69772	4.97564
ENSG00000072310.16_3	SREBF1	chr17:17713713-17740316	-	protein_coding	-0.887551	0.540531	8.31964e-05	0.00248463	1.95694	2.84449	3.35918	2.00563	3.87928	2.25658	3.16918	2.9453	6.0247	5.73833	7.36381	7.76014	4.82888	5.7918
ENSG00000072571.19_3	HMMR	chr5:162887209-162918951	+	protein_coding	-0.597857	0.660735	0.000206043	0.00465102	4.57569	5.17354	25.6456	17.5929	26.5818	24.5169	21.4493	22.4903	39.4347	32.1495	39.4432	33.3885	36.6891	30.4519
ENSG00000073756.11_2	PTGS2	chr1:186640923-186649559	-	protein_coding	1.03317	2.04652	4.90753e-06	0.000384227	1.58958	0.556411	1.97356	2.36826	1.69516	1.30674	2.95822	2.01514	0.493272	0.610104	0.318036	0.392897	0.473899	0.554788
ENSG00000073910.20_4	FRY	chr13:32605437-32873259	+	protein_coding	-0.690088	0.619816	3.28299e-06	0.000286167	0.72099	1.41108	0.426747	0.587934	0.648403	0.734226	0.69093	0.83132	1.53948	1.6211	1.30416	1.66984	1.87311	2.00665
ENSG00000074527.11_2	NTN4	chr12:96051583-96184930	-	protein_coding	-0.691534	0.619195	0.0011022	0.0153475	4.53576	5.22729	27.342	19.1632	27.8798	15.5934	21.4237	24.3612	41.6003	38.6263	42.2051	37.7771	29.5846	30.9464
ENSG00000074590.13_3	NUAK1	chr12:106457118-106533811	-	protein_coding	0.955345	1.93904	4.26202e-05	0.00158763	2.02525	1.0699	3.24803	4.08232	2.54822	3.95509	2.73591	2.20818	1.17392	1.61778	1.08796	1.2229	0.719597	0.884508
ENSG00000074660.15_4	SCARF1	chr17:1537152-1549041	-	protein_coding	-0.649811	0.637364	0.000152552	0.0038432	1.17183	1.82164	1.49995	1.08936	1.39663	0.957976	1.2559	1.36513	2.46016	1.9886	3.12673	3.39454	1.9485	2.52795
ENSG00000078081.7_3	LAMP3	chr3:182840001-182881627	-	protein_coding	-0.615082	0.652893	0.00440997	0.0394124	3.89452	4.5096	13.0263	14.849	14.1514	15.9509	15.1465	10.7363	28.8232	24.8442	23.9309	23.4278	13.4288	19.6241
ENSG00000078098.13_2	FAP	chr2:163027194-163101661	-	protein_coding	0.651704	1.57102	6.68642e-06	0.000477732	1.01404	0.362334	1.07085	0.771248	1.36548	0.923738	1.26812	0.792152	0.204934	0.303026	0.384226	0.309997	0.249156	0.268907
ENSG00000078401.6_2	EDN1	chr6:12290596-12297427	+	protein_coding	1.19606	2.29113	2.77606e-06	0.000262803	6.42327	5.22721	82.2888	114.659	73.1224	98.809	81.0954	67.2929	35.4457	41.084	36.4396	34.2372	31.9503	40.4316
ENSG00000079257.7_2	LXN	chr3:158363611-158390482	-	protein_coding	-0.845907	0.556361	0.00068405	0.0109073	3.85689	4.7028	8.94401	13.0003	12.5216	14.2617	19.0318	15.0766	25.033	21.461	21.1682	21.5837	30.149	33.2122
ENSG00000079308.16_3	TNS1	chr2:218664512-218867718	-	protein_coding	0.883909	1.84537	0.0156668	0.0944412	2.09335	1.20944	5.40213	4.31699	4.50232	4.38312	1.91006	1.05826	1.98753	1.70588	1.72717	1.42719	0.589727	0.797685
ENSG00000081181.7_2	ARG2	chr14:68086515-68118437	+	protein_coding	-0.608201	0.656014	0.000274438	0.00567765	1.8804	2.4886	2.88621	2.18014	2.6526	2.0074	3.11465	3.4591	4.47431	4.45684	5.55545	3.65853	4.78735	4.91923
ENSG00000081277.12_3	PKP1	chr1:201252580-201302121	+	protein_coding	1.40933	2.65614	0.000675069	0.0107772	2.19422	0.78489	5.53096	4.83202	5.44483	3.93454	2.24175	1.33949	1.29547	1.23027	0.510467	0.983367	0.264473	0.348961
ENSG00000085449.14_3	WDFY1	chr2:224720433-224810104	-	protein_coding	-1.09152	0.469266	0.00970457	0.0672063	4.02005	5.11157	13.8694	11.2937	8.56766	35.0396	28.9017	8.67553	37.7891	36.0512	35.2541	32.8422	28.4031	31.9377
ENSG00000085563.14_2	ABCB1	chr7:87132949-87342639	-	protein_coding	-0.984813	0.505291	5.00138e-08	1.72087e-05	2.94629	3.9311	6.14089	6.88074	6.25908	6.81265	8.19601	6.14384	15.6533	14.7723	14.6328	13.3092	13.0827	14.2246
ENSG00000086991.12_2	NOX4	chr11:89057524-89231355	-	protein_coding	1.11558	2.16682	1.16948e-09	1.91136e-06	1.51098	0.395403	1.68393	1.78082	1.54539	1.96361	1.98066	2.19357	0.299708	0.32276	0.245726	0.334605	0.386195	0.306901
ENSG00000087245.12_3	MMP2	chr16:55423612-55540603	+	protein_coding	1.2254	2.33821	0.00295379	0.0301607	2.7997	1.5743	9.67842	8.67161	7.97938	5.45191	4.766	2.30334	2.51284	3.08262	2.5471	2.30693	0.887855	1.19588
ENSG00000087903.12_3	RFX2	chr19:5993175-6199583	-	protein_coding	0.750164	1.68198	9.43683e-05	0.00275501	1.76629	1.01613	2.33934	2.86478	2.51336	2.97359	2.16764	1.71526	1.23633	0.983731	1.28377	1.33934	0.640006	0.760743
ENSG00000089127.12_3	OAS1	chr12:113344582-113371027	+	protein_coding	-0.913236	0.530993	0.00385771	0.0362157	1.00155	1.91479	0.678487	0.755197	0.921669	0.585184	1.29426	2.12851	3.0043	2.39929	1.7759	1.61989	5.23116	3.65886
ENSG00000090020.10_2	SLC9A1	chr1:27425306-27493472	-	protein_coding	0.980505	1.97316	0.00333056	0.0330403	3.19303	2.21252	8.47584	12.9975	8.86581	11.1345	5.29358	4.85413	4.21957	4.34346	4.5313	4.43531	1.85335	3.14333
ENSG00000090238.11_3	YPEL3	chr16:30103635-30108236	-	protein_coding	-0.627684	0.647215	0.000147612	0.00377697	1.82498	2.45266	2.91497	2.20661	2.6697	2.79858	2.40163	2.32296	3.48852	5.08216	5.15851	5.63302	4.18253	3.65649
ENSG00000090339.8_2	ICAM1	chr19:10381511-10397291	+	protein_coding	-0.609019	0.655642	0.00361881	0.0346129	3.80727	4.41629	14.6212	10.7764	17.3499	12.9721	12.1684	11.1189	25.5271	22.0503	23.7339	22.7282	15.0971	15.4038
ENSG00000091039.16_3	OSBPL8	chr12:76745577-76953589	-	protein_coding	0.588706	1.5039	0.000111389	0.00310536	5.23343	4.64472	36.0841	38.8785	36.9377	44.456	37.5209	27.8551	25.0832	24.0513	26.0658	24.1453	21.1708	23.8513
ENSG00000091409.14_3	ITGA6	chr2:173292082-173371010	+	protein_coding	-0.902629	0.534911	0.000598684	0.00986396	2.19112	3.09375	3.70686	4.00285	3.54927	3.1851	3.98454	3.05823	13.4595	5.95462	6.75882	6.25651	9.19946	5.70411
ENSG00000091879.13_2	ANGPT2	chr8:6357172-6420930	-	protein_coding	-0.793942	0.576766	3.01597e-05	0.00129717	0.422582	1.21652	0.421621	0.552797	0.385851	0.105868	0.308305	0.309878	1.87725	1.59109	1.29833	0.858574	1.26894	1.17965
ENSG00000095015.5_2	MAP3K1	chr5:56111401-56191979	+	protein_coding	-0.693037	0.61855	0.000184026	0.00430551	1.33554	2.02858	1.81908	1.54303	1.84194	1.69072	1.33388	1.01935	3.66909	3.45057	3.44829	3.42272	2.1609	2.56978
ENSG00000095752.6_3	IL11	chr19:55875757-55881831	-	protein_coding	2.06481	4.18379	3.29522e-10	8.617e-07	2.85748	0.792671	4.94192	6.69221	5.45223	7.76989	6.38889	6.58344	0.688666	0.683209	0.675599	0.69119	0.850022	0.813367
ENSG00000096968.13_3	JAK2	chr9:4984390-5128183	+	protein_coding	-0.828871	0.56297	2.72305e-05	0.00120691	2.5397	3.36857	5.54075	4.52598	5.49575	5.32902	4.37744	3.83695	10.8728	9.5209	10.967	9.93681	7.37663	7.86517
ENSG00000099194.5_2	SCD	chr10:102106881-102124591	+	protein_coding	-0.748914	0.595051	0.0188015	0.107256	6.43443	7.18335	88.3812	54.6559	105.23	48.7434	124.23	126.144	133.983	114.293	151.077	118.72	179.522	183.321
ENSG00000099260.10_2	PALMD	chr1:100111499-100160097	+	protein_coding	-0.721208	0.606589	1.59729e-08	1.06805e-05	2.38376	3.10497	4.08855	3.94082	4.10368	4.46422	4.13109	4.61681	8.09468	7.58308	7.18503	6.90461	8.07307	7.85219
ENSG00000099860.8_3	GADD45B	chr19:2476120-2478257	+	protein_coding	0.954126	1.93741	0.00466848	0.0410769	5.06311	4.10898	30.6147	47.7598	37.1624	43.0813	28.9082	16.9992	17.2554	17.6404	18.5516	23.7188	10.474	12.9891
ENSG00000099864.17_3	PALM	chr19:708939-748329	+	protein_coding	-0.609149	0.655583	0.0217961	0.118054	2.41827	3.02741	5.27646	2.64943	3.42176	7.01843	3.96733	4.78197	8.49266	7.86828	9.48798	8.70263	4.85394	4.85867
ENSG00000099998.17_3	GGT5	chr22:24615622-24641110	-	protein_coding	-0.773842	0.584858	0.000263301	0.00550827	3.25311	4.02695	9.4828	9.71944	8.98169	6.35307	8.30262	8.78974	16.2303	17.6159	17.2259	18.7802	11.7162	11.7626
ENSG00000100311.16_2	PDGFB	chr22:39619364-39640756	-	protein_coding	1.27047	2.41241	0.00057175	0.00954741	3.15899	1.88852	9.45951	7.20594	11.2731	10.3843	5.22104	5.80685	3.0964	3.0792	3.44467	4.56426	1.25655	1.76272
ENSG00000100558.8_2	PLEK2	chr14:67853700-67878917	-	protein_coding	1.04761	2.0671	7.44334e-06	0.000503014	5.31092	4.26332	37.9769	35.3131	37.3346	33.3444	41.3754	48.5507	17.6752	18.1897	15.3713	14.7922	21.8388	22.7019
ENSG00000100994.11_3	PYGB	chr20:25228705-25278650	+	protein_coding	-0.650604	0.637014	0.00192492	0.0224517	5.96401	6.61462	61.7606	52.248	55.8282	46.4453	71.7304	89.2852	88.1364	95.3339	90.7102	84.4145	114.005	113.469
ENSG00000101306.10_2	MYLK2	chr20:30407111-30422492	+	protein_coding	0.731852	1.66077	1.90762e-07	4.30037e-05	1.08013	0.348278	1.17936	1.39687	1.06327	0.861969	1.01773	1.20569	0.246452	0.32301	0.370514	0.271722	0.205964	0.228014
ENSG00000101384.11_2	JAG1	chr20:10618332-10654755	-	protein_coding	1.11561	2.16686	1.47029e-05	0.000787872	4.71326	3.59765	28.5585	26.7737	27.7665	28.3061	23.2843	18.3869	12.6193	12.2973	12.8181	12.1788	7.84239	9.79423
ENSG00000101577.9_3	LPIN2	chr18:2916992-3013313	-	protein_coding	-0.588187	0.665178	0.00219682	0.02455	2.55406	3.14225	5.76418	4.32417	6.10794	4.92913	3.97022	4.43895	10.289	7.65059	9.50994	8.34233	5.91363	6.14501
ENSG00000101665.8_2	SMAD7	chr18:46446223-46477081	-	protein_coding	1.38283	2.6078	8.32748e-06	0.000544409	3.72388	2.34104	13.3422	15.7806	11.2028	16.1803	10.376	8.27021	4.63401	4.91422	3.45373	3.34019	3.49086	4.84881
ENSG00000101670.11_3	LIPG	chr18:47087069-47125552	+	protein_coding	1.48517	2.79951	3.47639e-07	6.22655e-05	3.04315	1.55798	7.82206	5.91603	8.1497	5.81552	8.59276	7.59412	1.7861	1.44691	1.92668	1.77615	2.91138	2.00763
ENSG00000101871.14_3	MID1	chrX:10413350-10851773	-	protein_coding	-0.758997	0.590907	0.0001075	0.00302273	2.09279	2.85179	3.7282	3.60629	3.68056	2.70248	3.21868	2.78391	7.20204	6.45507	7.70052	6.88127	4.5192	5.11575
ENSG00000102271.13_2	KLHL4	chrX:86772752-86925050	+	protein_coding	-0.742187	0.597832	0.000131916	0.00348444	2.60231	3.3445	5.08995	4.44662	5.03995	4.00757	6.10856	6.03167	9.56244	8.52101	9.12049	6.80302	11.4709	10.0906
ENSG00000102359.6_2	SRPX2	chrX:99899163-99930785	+	protein_coding	0.610631	1.52693	5.3657e-05	0.00185258	2.90227	2.29164	7.64089	5.97554	8.18579	6.42835	5.35806	5.67669	4.09285	4.16765	3.9104	3.72656	3.98999	3.51967
ENSG00000102471.13_2	NDFIP2	chr13:80055259-80130210	+	protein_coding	-0.649064	0.637694	0.00452151	0.0400151	2.94631	3.59538	5.38375	5.24655	5.87122	10.2129	6.85844	7.68503	7.48366	11.1577	11.3128	10.29	13.5742	13.9221
ENSG00000102572.14_3	STK24	chr13:99097439-99230194	-	protein_coding	0.64386	1.5625	0.0128225	0.0819746	4.23557	3.59171	20.0275	21.6385	21.9775	14.335	21.5412	10.8194	14.1855	9.83818	8.90383	15.4391	11.5173	8.15567
ENSG00000102699.5_2	PARP4	chr13:24995064-25086948	-	protein_coding	-0.867096	0.548249	0.000191809	0.00444664	3.56007	4.42716	12.4478	9.75603	13.5912	11.039	8.61964	10.0148	25.5993	22.0796	25.7004	19.992	16.7049	15.2738
ENSG00000102755.11_2	FLT1	chr13:28874481-29069282	-	protein_coding	0.877694	1.83744	0.000434344	0.00783317	3.50309	2.6254	13.352	11.9662	10.6006	9.45637	9.64419	7.84116	7.28676	7.21627	4.86114	4.2753	3.82325	4.43636
ENSG00000102802.9_2	MEDAG	chr13:31480328-31499709	+	protein_coding	1.35945	2.56587	5.45115e-05	0.00185281	3.0975	1.73805	6.48721	9.62351	5.58611	13.163	7.5086	5.2288	2.78112	3.18793	1.82064	2.13303	2.07805	2.19903
ENSG00000102981.9_2	PARD6A	chr16:67694849-67696681	+	protein_coding	-0.894785	0.537827	0.00154711	0.0192286	0.839577	1.73436	0.310708	0.692582	0.487657	0.79167	0.898348	1.92574	1.96325	1.72985	2.52684	1.68566	3.76469	2.71698
ENSG00000103044.10_2	HAS3	chr16:69139467-69152622	+	protein_coding	-0.94138	0.520734	0.00314519	0.0315605	0.388142	1.32952	0.194835	0.0870077	0.572067	0.0427678	0.116631	1.11322	0.360054	2.01111	1.7215	1.61725	1.77583	2.11191
ENSG00000103222.18_2	ABCC1	chr16:16043434-16236931	+	protein_coding	-0.617945	0.651598	0.0307843	0.148855	3.21542	3.83337	10.0241	9.08347	9.47112	9.39994	7.26646	5.41699	15.9546	15.9891	17.6083	17.3138	6.48976	10.4114
ENSG00000104332.11_3	SFRP1	chr8:41119477-41167016	-	protein_coding	-0.825778	0.564178	0.000434076	0.00783317	1.47136	2.29714	1.3728	1.60486	1.32426	1.39829	2.53285	2.73404	3.27016	3.33926	3.72929	3.35558	5.27831	4.8816
ENSG00000105281.12_3	SLC1A5	chr19:47278140-47291851	-	protein_coding	0.743706	1.67447	0.00423737	0.038448	5.19203	4.44833	32.0638	28.0777	33.8739	31.0249	38.5861	55.1437	13.2886	24.3505	24.8315	17.6537	26.9045	21.2286
ENSG00000105329.9_2	TGFB1	chr19:41807492-41859816	-	protein_coding	0.885807	1.8478	1.57012e-05	0.000817899	6.25362	5.36782	79.8796	75.0531	79.063	77.8971	73.8329	66.8619	38.3296	45.6973	44.5077	49.2042	29.092	38.2602
ENSG00000105514.7_3	RAB3D	chr19:11432722-11456946	-	protein_coding	-0.698275	0.616309	5.59386e-07	8.18758e-05	1.49202	2.19029	1.78227	1.84416	1.63998	1.93171	1.75877	1.9313	3.45491	3.83392	3.33933	4.26329	3.65227	2.94983
ENSG00000105784.15_2	RUNDC3B	chr7:87256864-87461611	+	protein_coding	-0.653329	0.635812	4.53046e-06	0.000365677	1.57613	2.22946	1.73229	1.80133	2.14393	1.66438	2.14509	2.48479	3.69259	3.86147	3.13154	3.65005	3.81304	4.04234
ENSG00000105810.9_2	CDK6	chr7:92234235-92465908	-	protein_coding	0.830387	1.77816	0.000360081	0.00694404	3.86325	3.03286	15.5608	18.28	12.8177	14.5102	12.7633	9.08684	8.46995	8.757	7.13987	7.16922	5.40509	6.63663
ENSG00000105974.11_3	CAV1	chr7:116164839-116201238	+	protein_coding	-0.764467	0.588671	7.08418e-06	0.000490889	6.92741	7.69187	114.534	110.745	124.493	102.761	139.867	136.321	216.49	194.852	186.385	186.554	224.559	230.428
ENSG00000106070.17_3	GRB10	chr7:50657760-50861159	-	protein_coding	0.965377	1.95257	4.28927e-08	1.60772e-05	3.36407	2.39869	9.44943	9.14173	8.92061	11.104	8.66216	8.69086	4.6003	4.38159	4.61276	4.2998	3.60269	4.2107
ENSG00000106351.12_3	AGFG2	chr7:100136834-100165842	+	protein_coding	-0.69424	0.618035	5.11541e-05	0.00178834	2.08423	2.77847	3.28468	3.06358	4.27116	2.31498	2.86237	3.94796	5.98009	6.26614	5.74848	6.03846	5.82199	5.34829
ENSG00000106366.8_2	SERPINE1	chr7:100770370-100782547	+	protein_coding	0.933531	1.90995	2.05714e-09	2.68971e-06	11.1948	10.2613	2301.27	2464.35	2218.21	2499.2	2330.02	2258.86	1174.6	1280.15	1251.71	1339.83	1126.26	1197.4
ENSG00000106804.7_2	C5	chr9:123714613-123812554	-	protein_coding	-0.703188	0.614214	9.35321e-06	0.000599476	0.652501	1.35569	0.744188	0.419658	0.544759	0.409806	0.718607	0.62765	1.69944	1.32264	2.10799	1.56957	1.42687	1.31195
ENSG00000107201.9_2	DDX58	chr9:32455703-32526322	-	protein_coding	-0.714819	0.609282	0.00060499	0.00992502	3.62308	4.3379	12.2621	8.41457	14.8867	8.69418	11.7978	13.2179	22.9813	19.0166	21.313	15.7618	19.6011	17.4922
ENSG00000107404.19_3	DVL1	chr1:1270656-1284730	-	protein_coding	0.619571	1.53642	0.023191	0.122465	3.32839	2.70882	11.7491	7.85558	11.0654	11.3126	5.8472	7.94479	4.84575	4.58599	8.17621	8.96112	4.55714	3.70819
ENSG00000107562.16_2	CXCL12	chr10:44865613-44881941	-	protein_coding	0.719593	1.64672	5.44947e-05	0.00185281	2.73218	2.01258	6.47526	6.02157	5.92032	6.33172	5.41889	4.0344	3.21213	3.87179	2.67914	2.99986	2.57936	2.993
ENSG00000107731.12_2	UNC5B	chr10:72972327-73062621	+	protein_coding	0.683343	1.60586	0.0124911	0.0804935	2.6178	1.93446	6.69081	6.32764	6.73368	5.3027	4.12698	2.79761	3.41153	3.38906	3.47812	3.69685	1.54642	2.00737
ENSG00000107738.19_3	VSIR	chr10:73507316-73533255	-	protein_coding	-1.63721	0.321478	1.31224e-08	1.00927e-05	1.4733	3.11051	1.64589	1.43278	1.4742	1.70321	1.83872	2.74919	7.47337	7.86777	6.99033	8.24178	8.04188	7.27353
ENSG00000107859.9_2	PITX3	chr10:103989943-104001231	-	protein_coding	0.615697	1.5323	0.000770144	0.0118567	1.96572	1.35003	2.91544	3.76734	2.03461	2.98297	2.23116	3.87223	1.44877	1.71361	1.108	1.75242	1.6093	1.72764
ENSG00000108342.12_2	CSF3	chr17:38171614-38174066	+	protein_coding	-0.604132	0.657867	0.00677437	0.052786	0.404184	1.00832	0.50404	0.244609	0.716013	0.113588	0.142045	0.314647	1.10537	1.21517	1.68696	1.39317	0.398278	0.57993
ENSG00000108448.21_4	TRIM16L	chr17:18601311-18639431	+	protein_coding	-0.620185	0.650587	0.00284074	0.0293435	1.17279	1.79298	1.06193	0.939937	1.1361	1.16916	1.31599	2.05892	2.26971	2.51344	1.89842	2.10237	4.2709	2.18027
ENSG00000108669.16_3	CYTH1	chr17:76670130-76778379	-	protein_coding	0.710889	1.63681	0.00210465	0.0238461	3.13296	2.42207	7.89413	9.0406	9.3676	9.34962	6.46102	5.37413	4.76213	4.80021	5.39489	5.49706	2.80329	3.487
ENSG00000108798.8_3	ABI3	chr17:47287589-47300587	+	protein_coding	-0.640691	0.641406	0.00756591	0.0567363	2.62068	3.26137	5.16428	5.63778	2.54204	6.35489	6.67897	5.6128	9.58258	9.80064	6.18363	8.02529	8.37153	10.1936
ENSG00000109189.12_2	USP46	chr4:53457138-53525502	-	protein_coding	0.662415	1.58273	0.000824266	0.0123735	2.55045	1.88804	4.76878	6.22423	4.59368	6.6591	4.23077	3.3277	3.11375	3.2466	2.31118	2.75542	2.22185	2.67373
ENSG00000109193.11_4	SULT1E1	chr4:70706930-70725870	-	protein_coding	-0.910055	0.532165	0.000730276	0.0113647	4.59536	5.50542	26.0695	23.7918	25.6373	12.9443	27.5939	26.9963	55.573	46.4175	51.4589	34.6139	40.0025	41.754
ENSG00000109686.17_4	SH3D19	chr4:152023903-152246784	-	protein_coding	-0.690653	0.619573	0.00832456	0.0604687	2.76133	3.45198	7.8083	5.39001	7.30617	6.2061	4.29744	4.44364	13.3621	11.1906	13.5951	10.2925	6.64766	6.78261
ENSG00000109762.15_2	SNX25	chr4:186125391-186291339	+	protein_coding	0.676293	1.59803	0.00191084	0.0223472	3.02068	2.34438	8.59671	7.07311	8.60548	8.51708	5.81661	4.91739	5.32699	4.25475	5.04383	4.01686	3.16653	3.08422
ENSG00000109814.11_3	UGDH	chr4:39500375-39529931	-	protein_coding	0.665263	1.58586	3.3458e-06	0.0002896	5.86283	5.19756	57.9354	59.7051	52.4754	51.8572	66.8569	55.6066	34.8582	37.1713	31.5627	34.7674	35.8764	40.5389
ENSG00000109846.7_2	CRYAB	chr11:111779289-111794446	-	protein_coding	0.588718	1.50391	0.0418814	0.180503	3.62827	3.03955	22.2621	12.382	13.4416	7.96176	8.46956	8.37129	8.47034	8.70186	9.3446	6.35135	6.58067	4.83402
ENSG00000110002.15_3	VWA5A	chr11:123986069-124018428	+	protein_coding	-1.33315	0.3969	5.04313e-06	0.000389633	2.4888	3.82195	4.13605	3.44818	4.73004	3.38234	6.2036	6.56812	14.178	12.5001	12.6943	10.9109	14.8962	14.0589
ENSG00000110092.3_2	CCND1	chr11:69455855-69469242	+	protein_coding	0.64552	1.5643	0.0363877	0.165889	5.47886	4.83334	60.9851	61.7212	43.6144	50.3666	33.0008	24.9694	35.9698	38.276	27.3825	29.7357	17.1571	22.3436
ENSG00000110852.4_3	CLEC2B	chr12:10005583-10022735	-	protein_coding	-0.617213	0.651929	1.08849e-05	0.000668166	3.56747	4.18469	10.4836	11.8863	9.6303	10.4285	11.7877	11.0771	18.4127	17.8386	14.5017	16.6878	16.1228	20.0636
ENSG00000111057.10_3	KRT18	chr12:53342655-53346685	+	protein_coding	-0.5969	0.661173	0.0136684	0.0857288	4.9863	5.5832	29.6984	21.2484	30.9619	24.8891	38.0149	44.9998	41.3752	35.0148	50.183	56.6319	62.3344	41.5831
ENSG00000111110.11_2	PPM1H	chr12:63037762-63328817	-	protein_coding	-0.648471	0.637956	4.34821e-07	7.04057e-05	2.4638	3.11227	5.21814	4.24542	4.5652	3.9083	4.48239	4.77082	7.63115	7.97041	8.31425	7.63783	7.07068	7.31705
ENSG00000111186.12_2	WNT5B	chr12:1639057-1756409	+	protein_coding	0.914374	1.88475	2.9716e-05	0.0012823	2.98178	2.0674	8.36133	8.3302	5.66565	5.67293	7.51661	6.34472	4.21843	3.81282	3.11167	2.58538	2.8224	2.83068
ENSG00000111335.12_2	OAS2	chr12:113416200-113449528	+	protein_coding	-1.03091	0.489401	9.71013e-05	0.00281508	2.47167	3.50258	4.72869	3.98927	4.40387	2.90221	5.48332	6.4537	11.7297	10.6398	8.91367	7.6646	12.7468	11.1154
ENSG00000111424.10_2	VDR	chr12:48235320-48336831	-	protein_coding	0.737692	1.66751	0.000415207	0.00762476	1.61379	0.876099	2.49378	2.67519	1.92103	2.70665	1.51189	1.35344	0.953464	0.994099	1.00219	1.01149	0.428937	0.705309
ENSG00000111817.16_3	DSE	chr6:116575336-116766023	+	protein_coding	0.678589	1.60057	5.20399e-08	1.74467e-05	1.86026	1.18167	2.90372	2.80889	2.37065	2.61499	2.84546	2.28791	1.3566	1.28811	1.1907	1.16881	1.34332	1.2694
ENSG00000111859.16_3	NEDD9	chr6:11183531-11382581	-	protein_coding	1.32769	2.51	4.09042e-06	0.000338495	3.27824	1.95055	9.39993	10.3064	9.37176	10.1236	7.67324	6.08677	3.03846	3.10609	3.4472	3.44321	1.81177	2.61937
ENSG00000111912.19_4	NCOA7	chr6:126102307-126253176	+	protein_coding	-0.68362	0.622601	0.00146027	0.0184435	2.08519	2.76881	3.99585	3.25369	4.02595	2.51959	2.70432	3.19213	7.93379	5.17387	6.10625	6.91542	5.89983	3.68191
ENSG00000112078.13_2	KCTD20	chr6:36410544-36458920	+	protein_coding	-1.12017	0.460039	0.00043289	0.00783317	2.62549	3.74566	3.13723	4.58712	5.54566	3.6905	5.7761	10.4831	12.9462	13.5754	10.9408	11.2992	13.8128	12.1741
ENSG00000112414.14_3	ADGRG6	chr6:142622991-142767403	+	protein_coding	-0.716295	0.608659	0.00149936	0.0188139	3.90754	4.62383	16.7536	11.3078	19.4771	13.1558	11.9165	12.9604	28.5865	24.1759	30.9376	23.1848	19.1781	18.3493
ENSG00000112559.13_2	MDFI	chr6:41604620-41621984	+	protein_coding	0.743052	1.67371	0.00542831	0.0452536	2.85352	2.11046	5.14092	7.05046	5.6676	7.37793	3.5862	10.2551	3.10137	3.30534	2.80599	2.66553	5.13097	3.29348
ENSG00000112715.21_4	VEGFA	chr6:43737921-43754224	+	protein_coding	1.99405	3.98355	2.21199e-08	1.25747e-05	3.09092	1.09686	8.11748	7.0351	9.4278	9.55559	6.20839	5.58221	1.39888	1.1233	1.26607	1.20265	0.837301	1.0498
ENSG00000113070.7_2	HBEGF	chr5:139712428-139726216	-	protein_coding	0.63043	1.54803	0.0064573	0.0510764	4.7468	4.11637	27.2117	34.8256	26.4074	32.1803	21.7656	16.903	18.3893	18.555	17.8224	19.0488	12.0828	13.5419
ENSG00000114315.3_2	HES1	chr3:193853934-193856521	+	protein_coding	0.714703	1.64115	6.57844e-06	0.000472599	3.75641	3.0417	12.8314	15.78	10.243	12.3142	13.1257	11.413	7.57541	7.22239	6.55666	7.27311	7.50214	7.31927
ENSG00000114796.15_2	KLHL24	chr3:183353356-183402265	+	protein_coding	-0.67029	0.62838	2.13518e-07	4.57663e-05	1.55667	2.22696	1.96859	1.73031	2.04495	1.70249	2.14782	2.08676	3.4695	3.46998	3.90435	3.35258	3.80156	4.14053
ENSG00000115267.5_2	IFIH1	chr2:163123589-163175213	-	protein_coding	-0.633005	0.644832	0.00158519	0.0195532	1.99195	2.62496	3.10868	2.06778	3.93243	1.97898	3.22303	4.06457	5.67393	4.43484	5.39116	4.37899	5.64956	5.6451
ENSG00000115415.18_4	STAT1	chr2:191829084-191885686	-	protein_coding	-0.672266	0.62752	0.00188765	0.0221951	4.00471	4.67697	16.0458	12.2623	15.6596	11.319	17.6373	18.7862	28.5122	23.6681	21.2347	17.8029	29.9772	28.7178
ENSG00000115738.9_2	ID2	chr2:8818975-8824583	+	protein_coding	-0.629849	0.646244	0.00957009	0.0665579	1.08411	1.71396	1.38945	1.63453	0.336849	0.963038	1.15417	1.55155	2.60378	2.71989	3.12698	1.76759	2.56941	1.28086
ENSG00000116132.11_3	PRRX1	chr1:170631869-170708560	+	protein_coding	0.644793	1.56351	0.000978269	0.0140869	2.10441	1.45962	2.88196	3.26816	3.08321	2.69963	4.5691	3.53644	1.22849	1.46457	1.64346	1.48574	2.32839	2.6035
ENSG00000116191.17_3	RALGPS2	chr1:178694282-178890976	+	protein_coding	-0.720832	0.606747	0.00467711	0.0411252	1.35332	2.07415	0.723099	2.71923	1.27026	1.20804	2.99651	1.16675	3.18721	3.26601	3.49002	3.38174	3.02218	2.94441
ENSG00000116285.12_2	ERRFI1	chr1:8064464-8086368	-	protein_coding	-0.605407	0.657286	5.23482e-05	0.00182035	5.85796	6.46337	48.4651	52.9654	63.1912	69.2339	56.191	54.3058	85.0009	79.7826	101.65	90.8451	81.8779	85.9634
ENSG00000116833.13_2	NR5A2	chr1:199996730-200146552	+	protein_coding	-0.696118	0.617231	2.70683e-08	1.26399e-05	0.526895	1.22301	0.361099	0.53758	0.331317	0.449	0.511565	0.466098	1.33893	1.39822	1.11266	1.42615	1.33925	1.40574
ENSG00000117122.13_4	MFAP2	chr1:17300997-17307330	-	protein_coding	0.738508	1.66845	3.25657e-05	0.00135173	1.40707	0.668563	1.63868	1.56656	1.23739	1.37275	1.91985	2.31382	0.354826	0.656377	0.494537	0.792364	0.543812	0.737701
ENSG00000117152.13_2	RGS4	chr1:163038565-163046592	+	protein_coding	-1.33475	0.396461	0.0260905	0.133087	4.77704	6.11179	56.127	11.0228	52.3977	42.7337	14.9755	15.5792	34.3921	89.4556	35.094	83.443	106.877	102.927
ENSG00000117155.16_3	SSX2IP	chr1:85109390-85156486	-	protein_coding	-0.629156	0.646555	2.60326e-05	0.00116968	2.13794	2.7671	3.55667	3.59526	3.09459	3.99138	3.14921	3.09407	7.23439	6.59426	5.5793	5.27653	5.05069	5.36878
ENSG00000117461.14_3	PIK3R3	chr1:46505812-46598708	-	protein_coding	-0.589127	0.664745	0.000406179	0.00753304	2.67446	3.26359	4.83398	5.27889	4.47714	5.3966	6.6951	5.85472	7.18885	7.77668	8.67065	7.5579	10.0532	10.9333
ENSG00000117472.9_2	TSPAN1	chr1:46640745-46651630	+	protein_coding	-0.59249	0.663197	0.0051872	0.0438131	0.999464	1.59195	0.703445	0.609098	1.16191	0.867273	1.19891	1.62451	1.51895	1.45549	1.58887	2.0707	2.96478	2.84973
ENSG00000117479.12_3	SLC19A2	chr1:169433147-169455241	-	protein_coding	1.75765	3.38148	6.06349e-05	0.001982	5.17878	3.42113	29.1248	37.5993	34.0006	42.912	37.1262	32.1455	12.6094	12.354	5.5225	14.0631	4.81604	13.5467
ENSG00000117525.13_2	F3	chr1:94994781-95007356	-	protein_coding	2.00311	4.00863	2.20582e-05	0.00102352	4.71879	2.71568	18.9328	33.0188	24.1015	47.8162	26.003	13.8602	6.13163	7.05968	6.18872	5.40319	3.56525	5.65267
ENSG00000117632.22_3	STMN1	chr1:26210672-26233482	-	protein_coding	-0.728865	0.603378	0.00682832	0.0530425	5.05226	5.78112	27.2569	28.8543	26.13	25.0579	45.0251	47.6149	65.352	39.4861	53.2707	41.3534	67.4199	64.456
ENSG00000117877.10_3	CD3EAP	chr19:45909467-45914024	+	protein_coding	0.632154	1.54988	0.0126159	0.0810581	2.63524	2.00309	7.79842	4.01333	4.35204	5.39943	7.86067	3.29603	2.5451	2.57982	2.86744	4.41574	2.35346	3.65453
ENSG00000118263.14_3	KLF7	chr2:207938861-208031991	-	protein_coding	1.05523	2.07805	0.000975337	0.0140775	3.54906	2.49383	11.998	13.8801	13.0542	13.819	7.80194	6.25362	4.82096	6.02539	6.13631	5.21775	3.14522	3.2461
ENSG00000118515.11_3	SGK1	chr6:134490384-134639250	-	protein_coding	1.11535	2.16647	1.17178e-05	0.000680936	4.20464	3.08929	14.1461	27.0733	15.6822	19.1317	16.5709	14.6607	7.39907	7.50856	7.4386	7.9808	6.70248	8.10992
ENSG00000118898.15_3	PPL	chr16:4932508-5010742	-	protein_coding	-0.650768	0.636941	0.00852233	0.0612315	0.160931	0.8117	0.220975	0.152959	0.254019	0.0673064	0.0234449	0.0127284	1.21362	0.978982	1.28359	1.18157	0.170021	0.145377
ENSG00000119326.14_3	CTNNAL1	chr9:111704849-111775809	-	protein_coding	-0.610447	0.654994	1.93205e-06	0.000208774	6.44617	7.05662	78.8792	77.8927	83.3812	92.1141	91.526	94.9293	128.102	124.465	132.102	123.966	143.918	141.55
ENSG00000119630.13_2	PGF	chr14:75408537-75422487	-	protein_coding	0.688766	1.6119	0.000222904	0.00492309	2.43453	1.74576	4.27559	5.3126	2.81115	5.33289	4.0442	5.15556	2.07164	2.49273	2.08884	2.40727	2.60451	2.49606
ENSG00000119686.9_3	FLVCR2	chr14:76044960-76129557	+	protein_coding	-0.935334	0.522921	1.43404e-07	3.60812e-05	3.42297	4.35831	8.17792	9.13735	9.57449	10.5482	9.67524	11.5511	19.0589	18.8116	18.3039	19.5446	21.8901	19.638
ENSG00000119714.10_3	GPR68	chr14:91698876-91720269	-	protein_coding	1.16431	2.24126	1.03793e-07	3.01577e-05	1.74541	0.5811	2.41662	2.59405	2.87237	2.35277	1.73055	2.26373	0.459459	0.457855	0.294355	0.507034	0.662366	0.624658
ENSG00000119899.12_2	SLC17A5	chr6:74303102-74363878	-	protein_coding	-0.615374	0.652761	2.48486e-05	0.00112811	3.92346	4.53884	13.3521	13.0663	15.0469	11.3655	16.1316	16.7821	21.3103	21.2634	22.8513	22.5208	22.0249	23.5864
ENSG00000119986.6_2	AVPI1	chr10:99437181-99447080	-	protein_coding	-0.595779	0.661687	0.000124445	0.00334109	2.01171	2.60749	3.21051	2.90875	2.74559	2.7036	3.10733	3.58603	5.34991	4.39129	4.29872	4.53149	5.6297	6.70247
ENSG00000120337.8_2	TNFSF18	chr1:173009100-173020103	-	protein_coding	-2.16695	0.222681	6.3879e-06	0.00046401	1.00953	3.17648	0.550284	1.09116	0.55489	0.503615	2.11259	1.82256	8.31658	6.79897	6.4584	5.39536	11.6049	11.5012
ENSG00000120708.16_3	TGFBI	chr5:135364584-135399507	+	protein_coding	1.39219	2.62477	1.32612e-05	0.000744164	7.42311	6.03093	221.369	191.484	224.303	162.218	128.849	124.037	75.2026	72.4689	67.7146	68.1818	52.4633	53.9249
ENSG00000120756.12_3	PLS1	chr3:142315229-142432506	+	protein_coding	-0.748074	0.595398	1.13572e-06	0.00013878	1.7853	2.53337	2.87186	1.87959	2.62868	2.38229	2.34259	2.66668	5.28376	4.78016	5.20042	4.72111	4.33222	4.47966
ENSG00000121769.7_3	FABP3	chr1:31838472-31849697	-	protein_coding	-1.3404	0.394912	0.00852324	0.0612315	1.6221	2.9625	1.57548	0.775086	3.45107	0.755885	2.91601	5.08036	3.53698	4.24452	5.55428	6.80374	14.298	11.0469
ENSG00000121858.10_2	TNFSF10	chr3:172223298-172241297	-	protein_coding	-0.656857	0.634259	3.65292e-05	0.00142149	0.320268	0.977125	0.3055	0.203125	0.333335	0.185589	0.193615	0.278311	0.978218	0.871793	0.904615	0.586796	1.52083	1.06281
ENSG00000121895.7_3	TMEM156	chr4:38968365-39034542	-	protein_coding	-0.973926	0.509119	1.20736e-07	3.43179e-05	2.47242	3.44634	3.78161	5.22912	4.1208	4.35197	5.46625	4.53506	10.9301	9.62828	9.7316	9.37227	9.7198	10.0887
ENSG00000122035.6_2	RASL11A	chr13:27844464-27847827	+	protein_coding	-0.909974	0.532195	2.48697e-06	0.000248222	0.37572	1.28569	0.270582	0.394778	0.153856	0.185299	0.331207	0.478715	1.12581	1.83148	1.0248	1.58996	1.62588	1.53341
ENSG00000122641.10_3	INHBA	chr7:41706766-41745432	-	protein_coding	1.15534	2.22737	4.38824e-07	7.04057e-05	3.64841	2.49307	13.2604	12.649	11.2934	12.4805	11.581	8.57996	4.23398	4.90826	4.84596	4.53441	3.94664	5.43292
ENSG00000122786.19_3	CALD1	chr7:134429003-134655479	+	protein_coding	0.920814	1.89318	0.00233925	0.0256377	5.84262	4.9218	70.8619	65.7601	71.1232	66.3557	43.7526	33.2402	38.4116	40.0115	24.8772	26.7526	22.2263	27.7695
ENSG00000122861.15_2	PLAU	chr10:75668935-75677255	+	protein_coding	-1.05792	0.480325	1.31179e-05	0.000744164	3.76452	4.82243	14.8926	11.1495	11.1651	9.85539	14.8344	14.6054	35.6912	30.0199	25.4436	26.6793	23.3797	24.2624
ENSG00000123609.10_3	NMI	chr2:152126979-152146571	-	protein_coding	-0.742038	0.597894	1.04029e-05	0.000647703	3.02296	3.76499	6.74059	6.9708	7.19153	6.40745	8.12178	7.4453	14.2489	11.9637	11.8643	9.8154	14.2278	14.0738
ENSG00000123610.4_2	TNFAIP6	chr2:152214106-152236562	+	protein_coding	1.05207	2.0735	4.77835e-06	0.000378648	1.26965	0.217585	2.00166	1.48659	1.41218	0.679911	1.51018	1.58736	0.178498	0.0948849	0.177251	0.102219	0.147272	0.286756
ENSG00000123892.11_3	RAB38	chr11:87846410-87908635	-	protein_coding	-0.708198	0.612084	0.00245149	0.0265781	1.45722	2.16542	1.3531	1.55579	2.07024	1.30552	1.7757	2.62687	3.68148	3.69721	3.15905	1.88058	4.50552	4.61885
ENSG00000123933.16_3	MXD4	chr4:2249159-2264021	-	protein_coding	-0.658985	0.633324	0.00398322	0.0369628	3.30321	3.96219	7.44593	7.82233	8.24528	7.06048	9.54613	14.7972	11.2746	13.4229	13.4736	15.3245	19.1826	15.9816
ENSG00000124212.5_2	PTGIS	chr20:48120411-48184683	-	protein_coding	-0.745191	0.596589	1.43382e-06	0.000161614	0.167166	0.912357	0.127733	0.219841	0.118831	0.099034	0.055984	0.121989	1.10969	0.968509	0.972817	1.01852	0.546084	0.738485
ENSG00000124216.3_2	SNAI1	chr20:48599536-48605423	+	protein_coding	2.16824	4.49474	1.54833e-10	6.74814e-07	4.01311	1.84487	14.0173	14.5731	14.8158	15.8458	16.3805	15.36	1.95354	3.06996	2.69938	3.10239	2.21861	2.6593
ENSG00000124225.15_3	PMEPA1	chr20:56223448-56286592	-	protein_coding	2.34843	5.09271	8.8898e-08	2.64168e-05	2.94334	0.594906	9.42765	8.65522	6.31116	7.84658	5.10214	4.21202	0.488571	0.803404	0.543568	0.471867	0.289132	0.509916
ENSG00000124440.15_2	HIF3A	chr19:46800303-46846690	+	protein_coding	-0.934543	0.523208	0.00763233	0.0568944	0.977884	1.91243	1.19552	0.811215	1.26773	0.760665	1.0455	0.79746	3.92733	3.88723	5.97234	2.26524	1.01628	1.57436
ENSG00000124575.6_2	HIST1H1D	chr6:26234496-26235161	-	protein_coding	-0.855006	0.552863	0.0155491	0.093905	1.47037	2.32538	2.60099	1.80655	1.23426	0.768517	1.90881	2.89675	2.50853	3.33349	3.86142	2.75853	9.67881	4.34295
ENSG00000124766.6_3	SOX4	chr6:21592999-21598850	+	protein_coding	0.955204	1.93885	3.97349e-05	0.00150589	2.37844	1.42323	5.45242	5.48788	3.43029	5.00402	3.23084	3.19529	1.90833	2.02242	1.46692	1.44494	1.79168	1.51379
ENSG00000124875.9_3	CXCL6	chr4:74702214-74714781	+	protein_coding	-1.47094	0.360747	2.07198e-05	0.000982606	1.99401	3.46495	3.42485	3.05935	2.91819	1.80395	4.4883	2.68887	12.8995	13.2881	10.7243	6.36046	8.46323	10.1769
ENSG00000125378.15_3	BMP4	chr14:54416454-54425479	-	protein_coding	-0.723466	0.60564	0.00119794	0.0161722	1.52197	2.24543	1.78713	2.4519	2.20442	1.42305	2.14464	1.38806	2.1882	4.06819	4.10028	4.91672	4.58837	3.17154
ENSG00000125965.8_2	GDF5	chr20:34021145-34042568	-	protein_coding	-0.859381	0.551189	0.000902416	0.0132277	1.28343	2.14282	1.4823	0.833989	1.35824	0.722497	1.84451	2.95466	3.43462	3.21352	2.87763	3.54013	3.77903	3.71884
ENSG00000125968.8_2	ID1	chr20:30193086-30194318	+	protein_coding	-0.599349	0.660052	6.36286e-05	0.00202913	5.69493	6.29428	44.3404	44.8796	49.4591	58.4531	54.3647	54.9273	67.2953	71.9426	84.644	90.7046	77.7398	74.8497
ENSG00000126778.8_2	SIX1	chr14:61110133-61124977	-	protein_coding	-0.585828	0.666267	4.55873e-06	0.000365677	4.21939	4.80521	17.4328	17.3766	18.1375	16.1129	19.7055	17.1894	29.0073	27.8659	28.3781	28.0663	22.358	26.6452
ENSG00000126860.11_3	EVI2A	chr17:29644578-29648902	-	protein_coding	-0.962535	0.513155	7.47456e-05	0.00229922	0.408976	1.37151	0.0842966	0.226836	0.441436	0.414969	0.345423	0.500888	1.30448	1.1356	1.48958	1.1223	2.64403	2.16656
ENSG00000126950.7_3	TMEM35A	chrX:100333709-100351353	+	protein_coding	-1.03944	0.486515	0.000433056	0.00783317	1.20039	2.23983	1.39469	0.977935	0.986589	0.645155	2.42093	1.78095	3.20911	4.05841	2.54217	3.14243	4.56615	5.38632
ENSG00000127083.7_2	OMD	chr9:95176527-95186743	-	protein_coding	-0.974265	0.508999	1.25309e-06	0.000148947	1.08211	2.05638	1.1751	0.885615	0.759986	1.24396	1.41406	1.30295	3.38918	3.07158	3.4387	2.5345	2.91145	3.72194
ENSG00000127863.15_3	TNFRSF19	chr13:24144509-24250243	+	protein_coding	0.722455	1.64999	5.78116e-05	0.00191605	1.12436	0.401903	0.983308	0.893984	1.12855	1.5784	1.6857	0.938805	0.188468	0.230525	0.255366	0.274289	0.479213	0.537313
ENSG00000128052.8_2	KDR	chr4:55944644-55991756	-	protein_coding	1.16171	2.23723	1.34949e-06	0.000157541	2.69003	1.52831	5.11774	6.61053	5.1707	6.90472	5.38081	3.9839	2.18701	2.08534	2.05059	1.80097	1.43636	1.8138
ENSG00000128284.19_3	APOL3	chr22:36536378-36562225	-	protein_coding	-0.716206	0.608696	0.000355227	0.00688088	1.51246	2.22867	2.09673	1.60474	2.51864	1.57632	1.76315	1.6689	4.69695	4.59836	3.4667	2.93891	4.28421	2.57545
ENSG00000128340.14_3	RAC2	chr22:37621301-37640488	-	protein_coding	-0.604784	0.65757	0.000208887	0.00469278	3.97861	4.58339	16.7547	13.1503	14.1747	12.7012	15.8701	16.4186	28.5845	25.7618	20.0726	20.8273	19.8544	24
ENSG00000128422.15_2	KRT17	chr17:39775689-39781094	-	protein_coding	1.08731	2.12478	7.43994e-07	9.82599e-05	1.92921	0.841898	3.05909	2.61285	2.7357	2.41032	2.58366	3.55753	0.634499	0.691839	0.688555	1.2713	0.940887	0.610963
ENSG00000128510.10_2	CPA4	chr7:129932974-129964020	+	protein_coding	-0.932128	0.524085	3.89331e-07	6.61105e-05	1.14972	2.08185	1.0104	1.37286	0.844179	1.17376	1.54904	1.44712	3.39712	2.98562	3.21094	3.03566	3.19291	3.61018
ENSG00000128567.16_2	PODXL	chr7:131185021-131242976	-	protein_coding	1.28278	2.43308	0.00711582	0.0543914	5.38538	4.10259	59.7744	50.7754	55.0558	53.5197	29.2352	17.3412	23.4047	23.4868	21.4634	17.6242	7.31702	11.3621
ENSG00000129048.6_2	ACKR4	chr3:132316081-132337811	+	protein_coding	-0.622579	0.649509	4.7154e-05	0.00169997	0.133105	0.755684	0	0.133919	0.0735294	0.0378261	0.178239	0.168576	0.643557	0.577325	0.667538	0.390152	1.10361	0.8327
ENSG00000129116.17_3	PALLD	chr4:169418217-169849608	+	protein_coding	0.591222	1.50652	0.00716318	0.0546752	3.58221	2.99099	11.9652	12.7879	12.0638	13.1	8.90255	8.05326	8.16635	8.22108	7.34531	9.09762	5.07382	4.83665
ENSG00000129422.14_3	MTUS1	chr8:17501304-17658426	-	protein_coding	-0.892059	0.538845	5.55039e-07	8.18758e-05	2.49811	3.39017	4.48848	3.74049	4.96314	4.37249	5.28801	5.20294	9.8223	8.59421	10.1839	8.56283	10.696	9.22613
ENSG00000130193.7_2	THEM6	chr8:143808621-143818345	+	protein_coding	-0.679205	0.624509	0.00313247	0.0314812	1.72061	2.39981	2.05501	1.79639	2.14127	2.09509	1.93643	4.25439	3.39042	3.28983	4.63957	4.65376	6.09506	4.07003
ENSG00000130312.6_3	MRPL34	chr19:17403418-17417652	+	protein_coding	-0.934101	0.523368	0.0288024	0.142217	3.36105	4.29515	4.31073	5.42807	6.03017	12.3769	15.5673	21.1232	15.5499	16.1041	15.0027	19.2836	27.7664	20.6614
ENSG00000130433.7_2	CACNG6	chr19:54495542-54515923	+	protein_coding	-0.735315	0.600687	0.00534829	0.0447116	1.2417	1.97702	0.950284	0.862694	1.05349	1.2531	1.7638	2.7646	2.2878	2.35159	2.28984	2.95746	4.88107	3.41209
ENSG00000130513.6_3	GDF15	chr19:18485541-18499986	+	protein_coding	-0.820326	0.566314	3.10695e-06	0.000278749	1.37912	2.19945	1.91823	1.94919	1.35075	1.35508	1.52249	1.57677	4.03291	4.29871	3.18786	3.55389	3.69743	2.92979
ENSG00000130830.14_3	MPP1	chrX:154006959-154049282	-	protein_coding	-0.759644	0.590642	0.00124236	0.0164912	2.07854	2.83818	2.74136	3.70071	2.03002	3.02697	4.14199	4.14591	7.87562	7.84714	4.59904	6.01746	4.73168	6.56288
ENSG00000131069.19_3	ACSS2	chr20:33459949-33515765	+	protein_coding	-0.822446	0.565482	0.00101617	0.0144732	2.31427	3.13672	4.01439	2.66454	4.47889	2.74616	4.35292	6.49687	7.66302	6.46139	7.10007	6.97815	9.69877	9.35763
ENSG00000131386.17_2	GALNT15	chr3:16216156-16273499	+	protein_coding	-0.759505	0.590699	1.42942e-07	3.60812e-05	0.233316	0.992822	0.232893	0.0383493	0.180004	0.18825	0.258048	0.168566	0.868272	0.962193	1.29555	0.927004	0.913469	1.0019
ENSG00000131435.12_2	PDLIM4	chr5:131593364-131609147	+	protein_coding	0.954097	1.93737	0.000883179	0.0130629	4.76181	3.80771	21.1582	23.8225	22.2292	26.9719	27.8063	37.7303	8.40255	11.0863	12.4199	16.1736	20.2271	12.5632
ENSG00000131634.13_3	TMEM204	chr16:1578689-1605581	+	protein_coding	0.625706	1.54297	7.20889e-06	0.000494367	3.65076	3.02505	12.0935	12.603	10.9733	11.3314	9.90027	12.6955	6.70923	7.38133	6.81649	8.66366	6.77564	6.66618
ENSG00000131747.14_2	TOP2A	chr17:38544768-38574202	-	protein_coding	-0.6179	0.651619	0.0015815	0.0195445	6.28881	6.90671	88.1284	79.1032	89.8603	87.02	63.9761	60.5663	141.252	124.673	138.674	127.184	95.8632	95.2386
ENSG00000131779.10_3	PEX11B	chr1:145516252-145523730	+	protein_coding	-1.32434	0.399331	0.00183617	0.0217857	2.43363	3.75797	3.336	4.65097	3.82478	3.59619	3.74203	8.64983	4.72066	12.8176	13.2498	15.9275	19.6196	14.5959
ENSG00000132109.9_2	TRIM21	chr11:4406127-4414926	-	protein_coding	-0.594735	0.662166	0.0027661	0.0288411	3.37387	3.96861	9.99307	7.27131	8.47151	8.9583	9.93646	12.2327	15.6734	12.837	11.9202	11.9888	20.2024	16.9363
ENSG00000132274.15_3	TRIM22	chr11:5710919-5758319	+	protein_coding	-0.970607	0.510291	0.000163245	0.00398959	2.35167	3.32228	3.35693	2.88758	4.76725	3.15724	5.20552	6.01673	9.09366	6.74931	9.59866	8.64677	10.8748	9.54544
ENSG00000132470.13_2	ITGB4	chr17:73717408-73753899	+	protein_coding	-0.711207	0.610809	0.00247589	0.0267108	0.963809	1.67502	1.09133	0.761637	1.55772	0.619329	0.945127	0.854976	3.03221	2.56848	3.23867	2.01116	1.20219	1.62142
ENSG00000132471.11_3	WBP2	chr17:73841780-73852588	-	protein_coding	-0.585249	0.666534	0.00291658	0.0299328	3.1398	3.72505	6.42745	5.64701	8.79196	7.04998	9.00688	11.0399	12.8546	12.8623	9.48964	14.2207	11.6555	12.7788
ENSG00000132718.8_2	SYT11	chr1:155829300-155854990	+	protein_coding	-0.715002	0.609204	0.000379754	0.00717486	2.75323	3.46823	7.01286	4.33104	6.88776	3.93162	5.94464	7.14029	11.3362	10.5529	10.2031	9.09977	9.71594	9.63413
ENSG00000133106.14_3	EPSTI1	chr13:43460524-43566407	-	protein_coding	-1.14599	0.451879	2.49103e-08	1.25902e-05	3.85492	5.00091	13.0739	13.0032	13.19	11.228	15.8094	14.9641	32.0177	29.0242	31.1582	28.7597	32.7179	32.693
ENSG00000133216.16_3	EPHB2	chr1:23037332-23247993	+	protein_coding	0.855484	1.80937	0.000185089	0.00431379	3.46109	2.6056	11.889	11.1734	11.5261	10.8927	8.44978	7.07599	5.58261	5.90904	5.56007	5.87438	3.51929	4.48478
ENSG00000133321.10_2	RARRES3	chr11:63304281-63313934	+	protein_coding	-0.779981	0.582374	0.0301671	0.146903	2.55073	3.33071	4.48283	4.95977	2.94853	2.6442	7.99263	8.57008	8.16541	8.50963	5.48575	7.17882	14.4332	13.5358
ENSG00000133808.4_3	MICALCL	chr11:12297627-12380691	+	protein_coding	0.920778	1.89314	7.00971e-05	0.00217701	1.47778	0.557001	1.95185	2.28384	1.66034	2.77917	1.38978	1.00432	0.386998	0.652942	0.579388	0.47261	0.331053	0.428692
ENSG00000134107.4_2	BHLHE40	chr3:5020801-5027008	+	protein_coding	1.51618	2.86033	9.4528e-09	8.07633e-06	5.52824	4.01206	48.9845	49.1316	47.4704	48.2718	42.811	35.8465	17.6209	14.3862	15.4704	14.7827	13.2975	15.5661
ENSG00000134198.9_2	TSPAN2	chr1:115590632-115632121	-	protein_coding	1.11374	2.16407	6.5967e-09	6.63476e-06	1.66757	0.553827	2.63529	1.97081	2.22101	2.05706	1.82667	2.41939	0.523222	0.399225	0.592303	0.428956	0.405551	0.468144
ENSG00000134245.17_2	WNT2B	chr1:113009163-113072787	+	protein_coding	-0.72828	0.603623	0.000133936	0.00350242	0.179576	0.907856	0.309626	0.114884	0.107532	0.101551	0.0855231	0.0913633	1.0026	1.03023	1.20188	0.943848	0.962909	0.277192
ENSG00000134324.11_3	LPIN1	chr2:11817721-11967535	+	protein_coding	-0.698205	0.616339	0.0012568	0.0166241	2.01458	2.71279	3.93514	3.03178	3.96799	2.93712	2.82301	1.92506	5.7653	6.18207	6.80613	6.51077	3.85967	4.73477
ENSG00000135074.15_3	ADAM19	chr5:156822542-157002783	-	protein_coding	1.66219	3.16497	3.09428e-05	0.00131356	4.32111	2.65891	23.8105	23.789	20.7966	22.6691	15.2972	11.3343	6.79553	6.68179	6.44636	5.82315	2.90813	4.33668
ENSG00000135919.12_3	SERPINE2	chr2:224839829-224904036	-	protein_coding	1.08082	2.11525	0.000167584	0.00406524	2.51408	1.43326	6.95868	5.45631	5.5094	2.37681	4.68399	4.41198	1.99233	2.06061	2.00139	1.465	1.36724	1.41835
ENSG00000136244.11_3	IL6	chr7:22765503-22771621	+	protein_coding	1.93195	3.8157	2.90703e-07	5.67304e-05	2.86186	0.929912	6.8204	7.11013	7.97884	7.57548	5.30922	3.78989	1.30453	0.774862	0.621832	1.1787	0.845988	0.792291
ENSG00000136514.2_2	RTP4	chr3:187086120-187089864	+	protein_coding	-0.645914	0.639088	0.00175499	0.0209941	0.624978	1.27089	0.580794	0.360865	0.816305	0.387105	0.588279	0.562814	1.1583	1.14665	1.49549	0.726345	2.23465	2.05826
ENSG00000136603.13_3	SKIL	chr3:170075466-170114623	+	protein_coding	0.706365	1.63169	0.000673312	0.0107623	3.91955	3.21319	16.6231	16.0891	14.8401	16.6723	13.1361	9.07476	8.30976	9.0009	9.1194	9.06207	6.3954	8.07432
ENSG00000136717.14_3	BIN1	chr2:127805603-127864931	-	protein_coding	0.916894	1.88805	1.94964e-06	0.000208947	4.8974	3.98051	29.5439	29.69	25.9769	25.4173	28.3306	34.7654	13.673	17.6006	12.6574	14.0257	14.7144	16.5778
ENSG00000136997.17_3	MYC	chr8:128747680-128753680	+	protein_coding	1.75285	3.37023	0.0402479	0.176177	3.83804	2.08519	31.4479	32.3444	31.9498	3.14101	19.9265	1.76905	2.15938	2.336	2.70031	2.61572	11.9724	2.1912
ENSG00000137198.9_2	GMPR	chr6:16238811-16295780	+	protein_coding	-1.04775	0.483722	1.99256e-06	0.000210997	2.47918	3.52692	4.87389	4.30756	4.44151	3.1682	5.45742	5.58099	11.6414	10.0842	9.62324	9.73185	11.1479	11.0872
ENSG00000137331.11_2	IER3	chr6:30710976-30712331	-	protein_coding	0.859242	1.81408	5.1609e-06	0.000394606	7.06924	6.21	131.811	156.595	128.548	140.754	118.765	126.423	69.3434	81.5898	68.4034	90.6251	69.6671	62.0398
ENSG00000137393.9_2	RNF144B	chr6:18387581-18469105	+	protein_coding	-0.909703	0.532295	9.88308e-09	8.07633e-06	3.25808	4.16778	8.36055	9.39293	7.94965	7.70209	9.31262	8.8139	17.5925	17.3487	16.3689	15.4025	17.4765	17.7725
ENSG00000137463.4_3	MGARP	chr4:140187317-140201492	-	protein_coding	-1.88851	0.270085	1.1687e-10	6.74814e-07	3.34214	5.23066	9.47148	7.51112	10.3393	8.50042	9.9791	9.3187	36.8381	33.6771	38.1063	37.759	38.8206	34.3845
ENSG00000137473.17_4	TTC29	chr4:147627790-147867034	-	protein_coding	-0.863817	0.549497	0.0182052	0.10486	1.98439	2.84821	2.90216	2.40401	2.2042	1.34444	4.91436	5.50444	6.20615	5.03961	4.85884	3.73019	11.2117	8.46678
ENSG00000137522.17_3	RNF121	chr11:71639747-71708643	+	protein_coding	0.88063	1.84118	2.89345e-06	0.000266422	4.13864	3.25801	15.6008	18.5464	15.7779	15.0402	18.8085	16.2634	7.74058	8.94731	7.14745	7.85659	10.6003	9.53279
ENSG00000137628.16_3	DDX60	chr4:169137444-169239958	-	protein_coding	-0.76347	0.589078	0.00127684	0.0167955	2.23926	3.00273	4.53902	2.96166	5.97842	2.90725	3.50016	3.11467	8.87304	6.31557	9.18277	5.71249	6.73278	5.94516
ENSG00000137752.23_4	CASP1	chr11:104896170-104905977	-	protein_coding	-0.922621	0.52755	1.35131e-05	0.000748662	2.07638	2.999	3.27056	2.73667	2.68492	2.76148	4.33471	3.76925	7.89203	6.84426	6.13738	5.7021	8.3119	7.40224
ENSG00000137801.10_3	THBS1	chr15:39873280-39891667	+	protein_coding	1.94922	3.86166	9.99383e-06	0.000625212	9.83391	7.88469	958.992	1159.8	867.537	1153.42	919.547	560.812	239.778	316.186	254.446	281.711	130.313	239.598
ENSG00000137880.5_2	GCHFR	chr15:41056218-41059908	+	protein_coding	-0.66112	0.632387	0.00400099	0.0369964	0.966682	1.6278	0.832702	0.857196	0.364978	0.885909	1.52888	1.51465	1.68867	1.80728	1.73484	1.68442	3.08586	2.84782
ENSG00000138061.11_3	CYP1B1	chr2:38294116-38337044	-	protein_coding	-0.711311	0.610765	0.0153425	0.0930396	1.96756	2.67888	2.09184	2.27379	2.54993	2.08306	5.13176	4.26891	4.00507	3.75953	4.63558	5.23711	7.69907	8.46589
ENSG00000138134.11_3	STAMBPL1	chr10:90639491-90734910	+	protein_coding	-0.70959	0.611494	8.32327e-05	0.00248463	1.69059	2.40018	2.64103	1.58532	2.65902	1.89442	2.11345	2.64424	5.14125	4.25822	5.01731	4.08911	3.8188	3.54028
ENSG00000138166.5_2	DUSP5	chr10:112257596-112271302	+	protein_coding	-1.05513	0.481255	3.91998e-06	0.00033067	4.85918	5.9143	25.042	23.2198	27.7818	25.2153	33.0401	35.9013	53.4718	53.9825	55.4792	59.3541	69.1579	66.1786
ENSG00000138172.10_2	CALHM2	chr10:105206543-105212159	-	protein_coding	-0.639117	0.642106	1.6045e-05	0.000829205	1.97748	2.6166	3.38468	2.76773	3.4764	2.61099	2.5998	2.88007	4.03884	5.16432	5.66199	5.61201	5.0774	5.40001
ENSG00000138356.13_3	AOX1	chr2:201450591-201541787	+	protein_coding	-0.668715	0.629067	0.000723903	0.0113218	5.23056	5.89927	41.1552	31.8745	34.396	27.0375	41.3757	47.0622	64.0798	60.9104	59.3097	45.0338	62.3706	62.765
ENSG00000138413.13_2	IDH1	chr2:209100951-209130798	-	protein_coding	-0.63579	0.643588	0.0051802	0.0438106	3.92353	4.55932	14.8121	12.2543	12.9189	9.76212	16.396	21.3509	25.5072	19.8037	21.3933	17.2922	26.6625	26.4893
ENSG00000138448.11_3	ITGAV	chr2:187454792-187545628	+	protein_coding	0.71287	1.63906	0.000442372	0.00796696	5.95406	5.24119	69.7132	57.2113	77.6375	64.2303	56.221	45.9845	42.9061	35.2036	45.9311	35.3537	30.7336	33.0189
ENSG00000138496.16_2	PARP9	chr3:122246771-122283424	-	protein_coding	-0.795625	0.576094	3.07689e-05	0.00131356	1.92981	2.72543	2.66139	2.3859	2.85655	2.45545	3.12076	3.4934	6.3661	5.15114	5.016	4.27463	6.85638	6.40804
ENSG00000138623.9_3	SEMA7A	chr15:74701630-74726808	-	protein_coding	1.245	2.37018	1.82538e-09	2.65188e-06	3.57069	2.32569	11.9822	9.79443	11.6129	11.7979	9.66257	10.6665	4.0519	4.08886	3.58429	3.89632	4.44915	4.0475
ENSG00000138642.14_3	HERC6	chr4:89299891-89364263	+	protein_coding	-0.587717	0.665395	0.00131943	0.0172	2.13993	2.72765	3.35181	2.53556	3.41127	2.61916	4.29753	4.63285	6.30607	5.13197	5.21394	4.57886	6.64114	6.11655
ENSG00000138646.8_3	HERC5	chr4:89378268-89427314	+	protein_coding	-0.618258	0.651457	0.00211891	0.0239453	2.76535	3.38361	6.3445	4.10792	6.92243	4.11463	6.69194	7.44904	10.0449	8.1325	9.48626	7.94731	11.0233	10.3585
ENSG00000138735.15_2	PDE5A	chr4:120415550-120550146	-	protein_coding	-1.10498	0.464909	7.24687e-09	6.76806e-06	0.865183	1.97016	0.852389	0.832484	0.768154	0.650144	0.99747	0.846637	3.46544	3.2351	2.83505	2.73047	2.5656	2.75038
ENSG00000138764.14_3	CCNG2	chr4:78078304-78354542	+	protein_coding	-0.768942	0.586848	3.42531e-05	0.00138228	2.19963	2.96857	2.57751	4.21117	2.95821	3.54432	4.61954	3.98583	7.62794	6.66374	6.94554	6.90711	6.008	6.90107
ENSG00000138772.12_3	ANXA3	chr4:79472673-79531605	+	protein_coding	-1.08357	0.471861	2.94278e-05	0.00127407	2.91869	4.00226	5.78785	5.11058	6.22354	5.4062	8.30349	9.46825	16.0505	13.3709	15.4076	11.9589	17.6545	16.4254
ENSG00000138794.9_2	CASP6	chr4:110609778-110624739	-	protein_coding	-0.592374	0.663251	0.000167177	0.00406524	2.68535	3.27773	5.12339	5.20165	4.95789	6.51854	4.89444	6.06427	8.57455	9.23065	7.62412	6.92426	10.5252	9.78507
ENSG00000139211.6_2	AMIGO2	chr12:47469490-47473734	-	protein_coding	2.14917	4.43572	4.54544e-08	1.65088e-05	4.26719	2.11803	21.0537	23.1479	16.3008	16.7926	18.5293	14.9208	3.82295	4.45052	2.62259	2.73924	2.59106	4.23309
ENSG00000139289.13_2	PHLDA1	chr12:76419227-76427712	-	protein_coding	-0.59662	0.661301	3.11077e-05	0.00131629	3.58573	4.18235	10.9965	12.8577	10.0128	12.0833	10.6159	9.7661	19.8423	19.0875	17.0231	16.5831	14.9553	15.919
ENSG00000139372.14_3	TDG	chr12:104359582-104382652	+	protein_coding	0.625048	1.54226	0.0140331	0.0871866	3.30396	2.67891	6.56316	18.23	7.90443	9.49336	6.85908	7.68894	5.90274	4.59824	5.81555	5.05846	5.17329	6.00066
ENSG00000139508.14_2	SLC46A3	chr13:29274201-29293107	-	protein_coding	1.75569	3.37688	2.3491e-09	2.79222e-06	5.33496	3.57927	38.0879	40.2704	42.2395	45.7205	35.3946	35.4583	9.6279	11.6268	12.4036	11.1551	9.17983	12.1022
ENSG00000139579.12_3	NABP2	chr12:56615799-56623638	+	protein_coding	-0.693474	0.618363	0.00243743	0.0264916	4.23651	4.92999	24.1406	14.0256	24.6206	12.0282	16.5289	19.2989	28.952	26.5979	27.5233	27.6702	35.1755	31.8168
ENSG00000139793.18_3	MBNL2	chr13:97873688-98046374	+	protein_coding	-0.663806	0.631211	0.00122744	0.0163975	2.69741	3.36121	6.36773	4.97641	6.78044	5.64711	5.47407	4.05139	10.0845	9.91112	10.522	11.9579	7.62269	6.56241
ENSG00000139874.5_3	SSTR1	chr14:38677204-38682272	+	protein_coding	-0.805553	0.572143	3.04802e-07	5.72836e-05	0.6167	1.42225	0.603041	0.429621	0.671125	0.390222	0.475624	0.654389	1.91778	1.75775	1.79863	1.30637	1.58948	1.7552
ENSG00000139926.15_4	FRMD6	chr14:51955818-52197445	+	protein_coding	1.51499	2.85796	4.47033e-06	0.000365677	6.67712	5.16213	87.7869	110.167	97.0657	121.466	112.305	84.5	44.2978	47.855	27.2755	27.8073	39.2099	28.074
ENSG00000140092.14_2	FBLN5	chr14:92335756-92414331	-	protein_coding	1.47369	2.7773	0.00516877	0.0437891	6.21995	4.74626	122.962	95.0361	94.0574	75.5103	53.2971	35.4873	37.4929	36.839	42.3349	30.4376	10.3483	15.5985
ENSG00000140497.16_3	SCAMP2	chr15:75136071-75165706	-	protein_coding	-0.599495	0.659985	0.00030777	0.00618139	2.88956	3.48906	5.09202	6.19958	8.87608	5.50122	5.90243	7.51956	9.70529	10.1385	10.2218	11.1261	10.7803	9.48336
ENSG00000140564.11_3	FURIN	chr15:91411822-91426688	+	protein_coding	0.708842	1.63449	0.00760979	0.0568235	4.83898	4.13014	31.3424	32.7202	30.5804	33.4453	21.5123	19.5801	17.3041	20.4547	20.4762	21.3668	10.3935	12.4119
ENSG00000140876.11_2	NUDT7	chr16:77756389-77776157	+	protein_coding	-0.619501	0.650896	0.000502681	0.00870537	1.28141	1.90092	1.78882	1.02327	1.22656	1.28222	1.52657	1.84753	2.1856	2.14676	3.27885	3.25436	3.39599	2.38161
ENSG00000141510.16_3	TP53	chr17:7565097-7590868	-	protein_coding	-0.722781	0.605928	0.00162907	0.019944	3.37267	4.09545	11.3465	8.95081	11.1822	6.21057	9.39152	10.0122	10.7543	18.8721	19.0986	18.7731	14.6091	16.2214
ENSG00000141574.7_4	SECTM1	chr17:80278900-80291950	-	protein_coding	-0.808472	0.570986	0.00226731	0.0251443	1.55962	2.36809	1.3325	2.0051	1.34254	1.37565	2.64693	3.61193	4.01777	4.01398	4.01949	3.21796	6.32797	3.85025
ENSG00000141580.15_3	WDR45B	chr17:80572438-80606429	-	protein_coding	0.722291	1.6498	0.0430742	0.183944	4.90504	4.18275	30.4775	37.3096	29.1305	16.6327	33.9318	31.3242	10.9509	27.258	24.1527	11.0945	11.0485	27.9834
ENSG00000142178.7_2	SIK1	chr21:44834395-44847008	-	protein_coding	1.10495	2.15092	0.00112304	0.0154539	5.29098	4.18602	39.8877	43.1084	44.3071	52.4987	32.3339	23.714	20.9318	21.4537	20.962	21.1583	9.80072	13.0503
ENSG00000143179.14_3	UCK2	chr1:165796768-165880855	+	protein_coding	0.70691	1.6323	1.90832e-08	1.13415e-05	4.51682	3.80991	19.9533	21.537	21.0649	23.3133	23.0302	22.6449	12.0609	14.1402	12.8489	12.9289	13.3582	12.8946
ENSG00000143367.15_3	TUFT1	chr1:151512781-151556059	+	protein_coding	0.625478	1.54272	5.19099e-06	0.000394606	3.67961	3.05414	12.2773	14.0287	11.7867	11.5776	10.8772	10.613	8.20526	7.20805	7.58279	7.05514	7.61197	6.29861
ENSG00000143409.15_2	MINDY1	chr1:150968562-150980851	-	protein_coding	-0.662279	0.631879	1.58087e-05	0.000820235	0.578954	1.24123	0.616545	0.309421	0.515584	0.524593	0.489261	0.525189	1.73827	1.19354	1.67103	1.34498	1.38936	0.941657
ENSG00000143867.6_2	OSR1	chr2:19551246-19558414	-	protein_coding	-0.766641	0.587784	1.1477e-05	0.000680569	0.525465	1.29211	0.279632	0.555394	0.266749	0.501932	0.791835	0.310749	1.67355	1.73393	1.24893	1.49765	1.2517	1.33282
ENSG00000143878.9_2	RHOB	chr2:20646835-20649206	+	protein_coding	1.26857	2.40923	1.77561e-07	4.073e-05	8.1867	6.91813	264.53	299.361	239.002	290.037	311.625	350.325	108.502	120.201	111.161	109.731	134.623	138.964
ENSG00000144655.14_2	CSRNP1	chr3:39183346-39196053	-	protein_coding	0.983006	1.97658	8.89853e-07	0.000115196	3.68138	2.69838	10.8311	12.8734	10.5676	10.835	12.7555	13.426	4.79094	4.91249	4.93477	5.52318	6.28329	6.74541
ENSG00000145349.16_4	CAMK2D	chr4:114372188-114683083	-	protein_coding	-0.646849	0.638674	1.31905e-05	0.000744164	2.08027	2.72712	3.11201	3.55598	3.04599	3.2535	3.89703	2.6225	5.41939	5.68296	5.09483	4.93323	6.36967	6.37074
ENSG00000145431.10_3	PDGFC	chr4:157681606-157892546	-	protein_coding	0.605868	1.52189	0.00218385	0.0244677	4.96089	4.35503	30.6792	34.8595	28.2348	36.8069	32.0235	21.0087	22.2247	21.8855	20.1376	19.6595	13.9201	20.2083
ENSG00000145632.14_2	PLK2	chr5:57749809-57756087	-	protein_coding	-0.660617	0.632608	1.81195e-05	0.000904246	4.53048	5.1911	18.0871	23.0241	23.0266	21.9706	22.2623	24.8803	36.1092	38.1577	38.9366	38.7624	30.0186	32.2123
ENSG00000145777.14_2	TSLP	chr5:110405760-110413722	+	protein_coding	-0.827946	0.563331	0.000105058	0.00297967	1.462	2.28994	1.46246	1.52573	2.06083	1.55716	2.42981	1.61822	3.23515	3.55764	3.13295	5.81433	3.73718	4.31175
ENSG00000145817.16_2	YIPF5	chr5:143537723-143550278	-	protein_coding	0.694972	1.61885	0.000949046	0.0137875	6.52661	5.83164	78.6915	88.1042	77.0549	82.9553	111.352	116.461	49.3546	51.7323	50.78	46.9389	71.8103	70.0932
ENSG00000146112.11_2	PPP1R18	chr6:30644166-30655672	-	protein_coding	0.650094	1.56927	0.00733817	0.0554925	3.83363	3.18353	14.1312	15.1308	15.9224	12.7475	13.0189	9.55087	7.92795	7.3845	12.862	6.40231	10.4263	5.40776
ENSG00000146250.6_2	PRSS35	chr6:84222257-84235423	+	protein_coding	-1.91466	0.265235	6.28183e-08	2.00329e-05	0.654696	2.56935	0.533789	0.48641	0.679604	0.321864	0.703422	0.765544	7.0323	6.01457	5.04419	4.41851	3.7851	3.95179
ENSG00000146278.10_2	PNRC1	chr6:89790470-89794879	+	protein_coding	-1.06294	0.478655	2.43332e-07	4.89472e-05	3.79492	4.85786	12.564	12.1838	12.7924	10.434	14.6708	15.1787	26.4824	27.4608	25.9947	26.855	29.6141	32.0187
ENSG00000146376.10_2	ARHGAP18	chr6:129897277-130031370	-	protein_coding	-0.61603	0.652464	1.75868e-05	0.000884413	5.26006	5.87609	39.1885	36.9016	43.5225	36.513	35.9004	32.7337	61.2186	61.2764	65.0815	58.0481	49.7774	52.4661
ENSG00000146411.5_2	SLC2A12	chr6:134309835-134373774	-	protein_coding	-1.10772	0.464026	5.07452e-07	7.74502e-05	0.648586	1.75631	0.578526	0.438833	0.77519	0.417345	0.433211	0.81205	2.15787	2.48896	2.9388	2.42219	2.63296	1.75544
ENSG00000146678.9_2	IGFBP1	chr7:45927956-45933267	+	protein_coding	-0.649153	0.637655	0.00321597	0.0320983	2.8521	3.50126	6.45352	8.67846	5.32708	5.93087	6.03455	5.3682	10.6212	13.7149	10.7258	12.031	6.26584	10.1041
ENSG00000146859.6_2	TMEM140	chr7:134832824-134850967	+	protein_coding	-0.7516	0.593944	0.000845806	0.0126243	0.57779	1.32939	0.507643	0.478657	0.315767	0.333425	0.464218	0.930519	1.71687	1.08259	1.14817	0.940249	2.39458	2.14581
ENSG00000147119.3_2	CHST7	chrX:46433219-46457843	+	protein_coding	-0.790086	0.578309	0.00021781	0.00481873	1.43064	2.22073	1.70144	1.6091	1.66305	1.21886	1.24105	3.11103	3.57962	3.59879	3.26667	3.5698	4.43232	3.59823
ENSG00000147883.10_2	CDKN2B	chr9:22002902-22009362	-	protein_coding	0.831432	1.77945	2.89212e-05	0.00126309	4.29098	3.45955	19.3913	19.3269	20.0889	19.1729	19.3489	14.682	10.871	9.14942	12.3504	11.469	7.5824	9.29663
ENSG00000148154.9_2	UGCG	chr9:114659046-114697649	+	protein_coding	-0.714901	0.609247	1.32597e-07	3.60812e-05	5.45011	6.16501	37.1543	42.8653	42.4835	43.7537	46.388	44.2258	67.0285	66.3977	68.7895	73.3143	72.5012	77.0947
ENSG00000148672.8_2	GLUD1	chr10:88810243-88854623	-	protein_coding	-0.650995	0.636841	0.0014148	0.0181358	6.72671	7.37771	91.2142	95.4041	88.2935	93.38	133.968	138.582	150.089	153.397	149.709	146.295	199.105	203.18
ENSG00000148677.6_2	ANKRD1	chr10:92671853-92681033	-	protein_coding	0.924825	1.89845	0.000233	0.00508593	9.06458	8.13976	531.317	572.907	626.289	704.668	432.402	401.064	265.349	300.419	331.887	348.016	218.224	245.158
ENSG00000149218.4_2	ENDOD1	chr11:94822974-94865809	+	protein_coding	-0.800242	0.574253	1.4267e-06	0.000161614	2.10871	2.90896	3.16625	2.55757	3.8228	3.32378	3.60312	3.52481	7.49896	6.41162	6.81152	5.63332	6.36343	6.46915
ENSG00000149573.8_2	MPZL2	chr11:118124118-118135251	-	protein_coding	-1.19304	0.43738	3.06689e-07	5.72836e-05	2.46221	3.65525	4.25771	3.21497	5.20861	4.86597	4.52911	5.27495	11.4896	10.6366	13.1869	11.7327	10.3711	12.3983
ENSG00000149591.16_3	TAGLN	chr11:117070037-117075498	+	protein_coding	1.08998	2.1287	1.13933e-05	0.000680569	6.30733	5.21735	74.726	61.8819	90.0611	81.0657	76.1948	88.8091	32.6593	33.4208	43.828	47.6298	34.0486	28.9525
ENSG00000149809.14_3	TM7SF2	chr11:64879317-64883856	+	protein_coding	-0.745137	0.596611	0.00171999	0.0206948	0.856191	1.60133	0.81581	0.362079	0.922266	0.340276	1.07508	1.66146	1.6227	1.73278	1.90841	1.99819	2.93192	2.1755
ENSG00000150347.14_2	ARID5B	chr10:63661059-63856703	+	protein_coding	-0.711449	0.610706	0.00512839	0.0437402	3.23108	3.94253	9.50301	9.89624	9.50613	9.67213	7.34977	5.3967	15.8587	17.1142	18.8655	16.2536	8.79429	11.8862
ENSG00000150630.3_2	VEGFC	chr4:177604689-177713881	-	protein_coding	0.690388	1.61372	0.00293625	0.030111	5.2189	4.52852	41.4408	43.4366	37.8986	41.8692	33.4771	23.6118	25.7736	28.0902	22.6674	23.0699	15.5034	19.6378
ENSG00000150764.13_3	DIXDC1	chr11:111797868-111893308	+	protein_coding	0.859408	1.81429	8.06688e-06	0.0005327	4.24249	3.38308	16.4228	17.5532	20.6184	18.6417	19.8877	15.0427	9.70592	9.34684	11.6138	8.95562	7.39714	10.0403
ENSG00000150779.11_2	TIMM8B	chr11:111955524-111957522	-	protein_coding	-0.680426	0.623981	0.0378527	0.169785	4.21909	4.89951	15.7628	17.0171	14.9876	14.2146	19.6309	26.532	13.3417	41.6759	38.871	40.0862	30.0385	21.7178
ENSG00000150782.11_2	IL18	chr11:112013974-112034840	-	protein_coding	-0.854331	0.553122	4.9897e-05	0.00177233	0.820079	1.67441	0.853092	0.900825	0.596751	0.514459	0.58463	1.24361	2.27815	2.16502	1.76088	1.6004	2.84924	2.68823
ENSG00000151014.5_2	NOCT	chr4:139936943-139967093	+	protein_coding	0.658803	1.57877	0.00652099	0.0513657	2.51066	1.85186	5.61957	6.04839	5.75297	4.78649	4.02308	2.74034	3.25686	3.04055	3.27073	3.06383	1.62379	1.82422
ENSG00000151023.16_2	ENKUR	chr10:25270908-25351208	-	protein_coding	0.617196	1.53389	3.59178e-05	0.00140783	0.873258	0.256063	0.875994	0.683307	1.02879	1.25622	0.736757	0.504911	0.211895	0.222923	0.13779	0.268239	0.156126	0.173173
ENSG00000151458.11_2	ANKRD50	chr4:125585207-125633887	-	protein_coding	0.634644	1.55255	0.00416275	0.0380374	4.34346	3.70882	22.5823	21.4277	21.7675	22.4492	16.7014	13.0039	14.0185	13.1385	14.3873	13.3656	8.12667	10.6671
ENSG00000152056.16_3	AP1S3	chr2:224616403-224702744	-	protein_coding	-0.855615	0.55263	0.011379	0.0752554	1.83643	2.69205	3.66525	3.23018	3.04333	2.57556	1.98548	1.43553	7.61409	7.81359	7.44925	6.46897	2.47673	3.37228
ENSG00000152661.7_2	GJA1	chr6:121756838-121770873	+	protein_coding	0.885781	1.84776	2.31449e-07	4.80348e-05	8.38712	7.50133	325.481	324.582	340.562	282.608	381.124	356.872	172.261	179.15	182.502	165.335	181.137	202.892
ENSG00000152766.5_2	ANKRD22	chr10:90581889-90611575	-	protein_coding	-1.33455	0.396517	7.09583e-06	0.000490889	0.868471	2.20302	0.885772	0.605987	0.442293	0.585362	1.34591	1.27977	3.81348	3.62286	3.17827	2.56573	3.74988	5.0513
ENSG00000152779.13_3	SLC16A12	chr10:91190056-91316398	-	protein_coding	-1.1382	0.454326	4.88368e-05	0.00174943	1.86163	2.99983	2.07629	2.08298	3.9124	2.08528	2.57235	3.48635	6.14986	6.25171	10.0377	7.81136	5.34371	7.18884
ENSG00000152804.10_2	HHEX	chr10:94449708-94455403	+	protein_coding	-0.717014	0.608355	0.00320852	0.0320729	1.87158	2.5886	4.0896	2.13413	1.87585	2.81355	3.62466	1.96783	5.86862	4.12068	3.38702	6.64769	5.12588	5.55249
ENSG00000153048.10_3	CARHSP1	chr16:8946799-8962869	-	protein_coding	-0.606793	0.656655	0.0409359	0.177938	3.16809	3.77488	5.76236	6.8677	6.06101	6.3473	10.6719	15.3704	9.34452	11.0378	10.1386	13.7269	20.0099	14.3283
ENSG00000153561.12_2	RMND5A	chr2:86947296-87005164	+	protein_coding	0.632828	1.5506	0.0126263	0.0810658	3.38924	2.75642	9.26723	11.8524	8.75991	11.2756	9.45446	7.0049	4.42855	4.59877	3.57392	8.73245	6.57366	8.28946
ENSG00000154016.13_2	GRAP	chr17:18923986-18950950	-	protein_coding	0.853033	1.80629	1.49959e-08	1.06805e-05	3.41094	2.55791	9.18086	9.49703	8.90414	9.93657	10.3369	10.0341	4.47534	5.5847	5.09209	4.64473	5.08208	4.5289
ENSG00000154319.14_3	FAM167A	chr8:11278972-11332224	-	protein_coding	-0.646007	0.639047	5.53609e-05	0.00185676	0.900037	1.54604	0.68711	0.960494	0.905942	1.15492	0.84662	0.683452	1.88215	2.24247	2.24922	2.28666	1.38492	1.60515
ENSG00000154589.6_2	LY96	chr8:74903587-74941322	+	protein_coding	-1.1152	0.461629	0.000422487	0.00773264	2.71441	3.8296	3.45131	6.34916	3.85617	6.46909	7.70081	6.74209	12.8924	12.0867	10.0582	10.5808	19.9905	15.9004
ENSG00000154734.14_4	ADAMTS1	chr21:28208066-28217728	-	protein_coding	-0.805771	0.572056	0.000640411	0.0103759	1.53553	2.34131	2.14191	2.55744	1.66509	1.53991	2.13996	1.49842	5.32527	5.14299	4.37724	4.14066	2.24128	3.86481
ENSG00000155090.14_2	KLF10	chr8:103661007-103668130	-	protein_coding	0.776003	1.71238	1.11874e-06	0.000137996	4.40172	3.62571	19.352	21.0012	21.8673	23.4172	18.7826	17.0321	12.6267	11.2227	10.9745	11.5853	10.2123	11.5696
ENSG00000156049.6_2	GNA14	chr9:80037995-80263223	-	protein_coding	0.601185	1.51696	0.000133327	0.00349777	3.49711	2.89593	10.7128	10.9097	10.3671	10.6695	9.89479	9.27864	6.81465	7.86641	7.51622	6.30055	4.6755	5.9551
ENSG00000156384.14_2	SFR1	chr10:105881816-105886143	+	protein_coding	-0.670733	0.628188	0.000247612	0.00524721	3.34811	4.01885	8.18997	7.73726	9.0314	8.26196	11.1152	11.337	14.959	12.2334	14.1099	14.9934	19.1537	16.641
ENSG00000156453.13_3	PCDH1	chr5:141232676-141258811	-	protein_coding	0.821083	1.76673	0.000227809	0.00499173	2.28628	1.4652	4.70617	2.30525	4.99063	3.69523	4.40735	3.69655	1.4299	1.77004	1.70414	1.80094	1.50671	2.46661
ENSG00000156587.15_3	UBE2L6	chr11:57319129-57335757	-	protein_coding	-0.628073	0.64704	0.0397873	0.174746	3.75068	4.37875	9.96369	11.2713	9.5882	9.08947	18.4303	20.3001	17.7631	17.5142	14.7296	15.1042	33.2153	25.9231
ENSG00000156875.13_3	MFSD14A	chr1:100503653-100548933	+	protein_coding	-0.872999	0.546011	0.0352364	0.162224	3.9048	4.7778	5.79987	16.5508	22.1568	22.3336	9.62628	15.4793	21.9556	24.321	16.1971	22.3139	38.1016	45.7665
ENSG00000157111.12_2	TMEM171	chr5:72416119-72427644	+	protein_coding	-0.81731	0.567499	2.87808e-05	0.00126278	1.39626	2.21357	2.01362	1.67312	1.63032	0.975513	1.70118	1.94133	3.71117	4.40141	3.45433	3.18575	4.23049	3.01206
ENSG00000157150.4_2	TIMP4	chr3:12194551-12200851	-	protein_coding	-0.813139	0.569142	0.00228487	0.025232	3.17553	3.98867	7.83747	6.29414	8.6714	5.22312	9.14677	12.8181	12.7378	14.5437	12.2166	13.2807	21.2638	16.8367
ENSG00000157227.12_2	MMP14	chr14:23305766-23318236	+	protein_coding	0.628755	1.54623	0.00221546	0.024714	6.08041	5.45166	69.9499	83.955	71.0708	70.4168	61.1935	48.7597	52.2515	52.2676	42.4017	45.3146	32.9652	35.2765
ENSG00000157601.13_3	MX1	chr21:42792231-42831141	+	protein_coding	-1.17028	0.444337	0.00271291	0.0284225	2.30195	3.47223	3.86254	3.04874	3.72765	1.7245	5.9203	7.19413	11.0256	9.19381	7.00465	6.7923	16.1379	13.2581
ENSG00000157613.10_3	CREB3L1	chr11:46299212-46342972	+	protein_coding	0.64039	1.55875	0.0163137	0.0971321	3.84705	3.20666	19.0901	14.1365	15.8315	13.9348	12.2949	7.73886	10.1458	10.146	8.77251	10.057	5.12628	6.52906
ENSG00000158290.16_2	CUL4B	chrX:119658464-119709649	-	protein_coding	-0.768635	0.586972	4.72428e-08	1.66946e-05	5.23188	6.00052	36.4491	32.7128	36.8205	36.0845	36.9202	40.9463	67.1233	62.7193	67.4402	58.2167	62.6927	60.4615
ENSG00000158769.17_3	F11R	chr1:160965001-160991138	-	protein_coding	-0.706906	0.612633	7.29801e-07	9.73688e-05	2.14908	2.85599	3.18375	3.01161	3.2636	3.24074	4.09544	3.92433	5.96524	6.63089	5.8664	6.17784	6.80688	6.04238
ENSG00000159082.17_2	SYNJ1	chr21:34001069-34100359	-	protein_coding	-0.809156	0.570716	0.0252846	0.130258	2.51176	3.32092	6.6149	5.42905	5.94566	5.54777	3.39011	2.52045	11.1348	12.3642	13.6944	11.3128	4.36787	5.32246
ENSG00000159167.11_2	STC1	chr8:23699428-23712320	-	protein_coding	-0.819102	0.566795	0.000112335	0.00312507	4.39609	5.21519	18.2341	24.9062	18.1487	21.7788	21.406	16.8905	43.6801	46.3571	34.4162	35.1268	28.9291	31.4305
ENSG00000159216.18_3	RUNX1	chr21:36160098-37376965	-	protein_coding	0.682154	1.60453	0.0153311	0.0930379	2.54537	1.86321	5.54882	7.3958	4.68571	6.43588	3.72255	2.60472	3.02973	3.62693	2.87773	3.4573	1.53814	1.83506
ENSG00000159217.9_3	IGF2BP1	chr17:47074774-47133012	+	protein_coding	0.652153	1.57151	0.000434329	0.00783317	2.75427	2.10211	6.55516	6.31101	6.84255	5.98289	5.14557	4.07489	3.71014	3.75563	3.84924	3.30225	2.36712	2.98041
ENSG00000159231.5_2	CBR3	chr21:37507210-37518864	+	protein_coding	-0.61792	0.65161	0.00595678	0.048226	3.72089	4.33881	11.2598	10.808	11.2532	9.24864	14.8944	17.1879	17.8203	18.7618	14.0051	17.5121	26.6932	22.997
ENSG00000159251.6_2	ACTC1	chr15:35080297-35088340	-	protein_coding	0.630668	1.54828	0.000201763	0.0045959	1.01216	0.38149	1.41232	0.808107	0.869205	0.532009	1.15886	1.49654	0.261664	0.300322	0.310547	0.297957	0.31282	0.333911
ENSG00000159261.10_3	CLDN14	chr21:37832919-37948867	-	protein_coding	1.72818	3.31309	4.65907e-11	6.09174e-07	2.784	1.05582	5.61373	6.46402	5.25651	6.51458	5.50046	6.07631	1.0073	1.0882	1.02304	1.26081	1.21033	0.90501
ENSG00000159388.5_2	BTG2	chr1:203274619-203278730	+	protein_coding	-0.815203	0.568329	6.30029e-05	0.00202828	1.75496	2.57016	3.03184	1.46304	2.93817	1.96417	2.49373	2.65018	5.50892	4.44899	5.60575	4.47873	5.24783	4.47046
ENSG00000160179.18_3	ABCG1	chr21:43619799-43717354	+	protein_coding	-0.697124	0.616801	0.00366112	0.0348646	1.11429	1.81141	0.624194	1.08993	0.984247	1.13417	1.6404	1.71231	2.01547	1.6112	1.85704	3.04596	3.81256	3.26802
ENSG00000160712.12_2	IL6R	chr1:154377669-154441926	+	protein_coding	-1.02056	0.492925	0.00037169	0.00704516	1.45294	2.4735	2.20836	0.438326	2.04509	2.14357	2.12036	2.05429	4.98078	4.75568	5.13613	4.68637	4.03312	3.85479
ENSG00000160886.13_3	LY6K	chr8:143781529-143786545	+	protein_coding	-0.83185	0.561808	0.0125557	0.0807902	4.54474	5.37659	18.8168	17.7947	17.1258	16.5693	31.9931	40.3113	30.4657	32.021	31.533	48.1812	61.8512	48.2062
ENSG00000160888.6_2	IER2	chr19:13261229-13265722	+	protein_coding	0.617609	1.53433	0.0203682	0.112702	4.22015	3.60254	15.5145	17.5156	17.4835	15.5214	18.6738	21.8152	13.9451	15.0669	13.2245	7.2613	6.13489	14.9562
ENSG00000161011.19_3	SQSTM1	chr5:179233398-179265078	+	protein_coding	-0.589055	0.664778	0.00186286	0.0219827	4.53431	5.12337	21.53	20.1496	20.4812	17.1133	25.0817	31.0133	31.137	32.2191	29.9248	30.9439	42.0528	38.5033
ENSG00000161277.10_2	THAP8	chr19:36525887-36545664	-	protein_coding	-0.650794	0.63693	0.000141094	0.00366031	0.902797	1.55359	0.798083	0.612544	1.3018	0.703986	0.92006	0.956335	1.58853	1.56482	2.34439	2.51964	2.06071	1.67495
ENSG00000161544.9_3	CYGB	chr17:74523438-74547257	-	protein_coding	-0.752575	0.593543	6.3044e-06	0.000460503	2.20338	2.95595	3.16331	3.63447	3.14978	3.35341	4.22323	4.24161	7.0893	7.8032	5.85702	7.50812	5.96524	6.54272
ENSG00000161638.10_3	ITGA5	chr12:54789045-54813244	-	protein_coding	0.771922	1.70754	1.39652e-07	3.60812e-05	7.45089	6.67897	178.327	162.737	184.252	166.718	183.987	168.97	95.4504	101.741	112.119	102.212	88.9825	110.159
ENSG00000162426.14_2	SLC45A1	chr1:8377886-8404227	+	protein_coding	-0.772635	0.585348	8.04368e-05	0.0024252	1.57723	2.34986	2.59681	1.28393	2.14867	1.99156	1.6155	2.48801	3.5137	4.8102	4.36135	4.67143	3.78609	3.59838
ENSG00000162458.12_3	FBLIM1	chr1:16083102-16113089	+	protein_coding	0.769971	1.70524	3.26841e-06	0.000286167	5.52917	4.7592	41.1298	45.8541	49.0498	54.253	42.3484	39.984	24.2333	27.3931	28.3615	28.7533	23.728	24.4851
ENSG00000162496.8_2	DHRS3	chr1:12627939-12677737	-	protein_coding	-1.76302	0.29463	2.22115e-06	0.000228673	0.921508	2.68453	0.392086	0.686085	0.690164	0.833826	1.51205	1.52667	4.73285	4.36498	4.21269	5.74867	6.94798	7.2086
ENSG00000162511.7_2	LAPTM5	chr1:31205316-31230667	-	protein_coding	0.658055	1.57795	1.39408e-05	0.00076116	3.04721	2.38915	6.80518	7.44593	7.44678	8.68368	7.15737	6.25256	3.81376	3.93716	4.84052	5.01726	4.29331	3.67409
ENSG00000162692.10_2	VCAM1	chr1:101185298-101204601	+	protein_coding	-1.40899	0.376575	1.40725e-05	0.000763475	1.28622	2.69521	1.77986	1.05751	1.91561	0.778168	1.62963	1.69891	8.05297	6.83319	5.93883	4.20189	4.27391	4.46674
ENSG00000162817.6_2	C1orf115	chr1:220863187-220872499	+	protein_coding	-1.05199	0.482301	8.84073e-06	0.00057224	2.63919	3.69118	5.86644	5.13521	6.60728	4.88918	4.87857	4.26907	13.065	14.9193	13.9249	10.9387	9.18969	10.4248
ENSG00000163219.11_2	ARHGAP25	chr2:68906733-69053965	+	protein_coding	-0.860195	0.550878	3.84836e-07	6.61105e-05	1.40366	2.26386	1.74241	1.61953	1.59181	2.21207	1.40097	1.38856	3.87596	4.21816	3.58816	3.69416	3.42422	4.06203
ENSG00000163347.5_2	CLDN1	chr3:190023490-190040264	-	protein_coding	-1.36305	0.388759	2.99246e-06	0.000271711	3.61614	4.97919	10.7022	8.97036	13.8885	7.65437	13.0804	15.059	33.068	29.7526	31.8664	29.1267	30.1553	29.4685
ENSG00000163431.12_3	LMOD1	chr1:201865580-201915716	-	protein_coding	-0.811593	0.569752	0.00127816	0.016796	0.354593	1.16619	0.165213	0.206179	0.360065	0.588081	0.146267	0.255809	1.55179	1.51313	1.78829	1.92398	0.527438	0.599586
ENSG00000163814.7_3	CDCP1	chr3:45123770-45187914	-	protein_coding	-0.732866	0.601708	6.05607e-06	0.000444849	1.8146	2.54747	2.48361	2.15044	3.13696	2.67466	2.36858	2.37094	5.61185	5.45762	4.98258	4.84649	3.94022	4.41077
ENSG00000163815.5_3	CLEC3B	chr3:45043040-45077563	+	protein_coding	-0.638764	0.642263	0.00358443	0.0344352	0.985132	1.6239	0.685407	1.24957	0.480223	0.718555	1.31952	1.68925	1.52532	1.76286	2.30557	1.69953	2.83787	2.58715
ENSG00000163840.9_2	DTX3L	chr3:122283085-122294050	+	protein_coding	-0.843827	0.557164	2.15038e-06	0.00022493	2.73669	3.58052	6.07394	5.06668	6.27255	4.69236	5.78072	6.27935	12.9362	11.8009	11.3309	9.28911	10.4871	10.2745
ENSG00000163884.3_2	KLF15	chr3:126061478-126076285	-	protein_coding	-0.657449	0.633998	0.00024669	0.00523615	0.980413	1.63786	0.830683	0.684373	1.10024	1.36114	0.817877	1.12224	1.85013	1.81418	2.47051	3.09149	1.87165	1.77747
ENSG00000164086.9_3	DUSP7	chr3:52082935-52090566	-	protein_coding	0.771227	1.70672	0.0309308	0.149282	2.976	2.20477	8.46772	9.94979	8.6055	8.79144	4.46912	3.44892	4.25163	4.62038	4.5111	5.85481	1.66278	2.23285
ENSG00000164104.11_3	HMGB2	chr4:174252846-174256276	-	protein_coding	-0.685711	0.6217	0.0127097	0.0814911	5.67018	6.35589	39.1864	49.7571	45.1788	46.6001	67.7603	55.5455	63.251	62.5895	113.321	121.674	93.6651	54.66
ENSG00000164236.11_2	ANKRD33B	chr5:10564442-10657928	+	protein_coding	-0.864606	0.549196	0.00090031	0.0132116	1.81908	2.68368	2.96413	2.68245	3.06241	2.81183	2.31467	1.57595	6.71212	6.22337	7.1637	5.95028	3.01788	4.53878
ENSG00000164251.4_3	F2RL1	chr5:76114758-76131140	+	protein_coding	1.46227	2.75542	1.69542e-05	0.000862552	5.88473	4.42246	51.7551	65.3056	40.8085	53.4755	75.3659	68.9356	20.9605	20.4058	14.4043	16.6548	25.5899	27.5994
ENSG00000164283.12_3	ESM1	chr5:54273692-54318499	-	protein_coding	1.4072	2.65222	5.07738e-05	0.00178459	4.10795	2.70076	15.6665	21.6338	12.4535	24.5642	16.6951	10.4494	6.55271	6.98215	4.86918	4.43957	4.28524	6.42374
ENSG00000164442.9_2	CITED2	chr6:139692944-139695757	-	protein_coding	-1.33139	0.397386	2.50359e-08	1.25902e-05	5.34749	6.67887	35.1849	44.9236	34.6745	37.2655	46.5108	41.2672	94.3092	106.861	94.3527	107.898	94.8212	112.092
ENSG00000164463.12_2	CREBRF	chr5:172483355-172566287	+	protein_coding	-0.687106	0.621099	3.09189e-07	5.72836e-05	1.04479	1.7319	1.08251	0.937706	1.21644	0.86222	1.25961	1.04876	2.12264	2.13716	2.58943	2.36859	2.18526	2.55998
ENSG00000164574.15_3	GALNT10	chr5:153570290-153800544	+	protein_coding	0.908163	1.87665	7.17884e-07	9.67664e-05	4.32408	3.41591	20.4792	20.8184	17.9639	21.7997	17.6142	16.1204	9.70949	11.2064	9.54518	9.21848	8.40363	10.1599
ENSG00000164649.19_3	CDCA7L	chr7:21940518-21985702	-	protein_coding	-0.657941	0.633782	5.63581e-07	8.18758e-05	3.99365	4.6516	15.5846	14.3115	17.2034	15.3457	13.4592	13.9567	23.5741	24.2964	26.2251	22.7485	22.8641	25.2863
ENSG00000164692.17_2	COL1A2	chr7:94023873-94060544	+	protein_coding	0.78384	1.72171	0.00172024	0.0206948	5.34057	4.55673	56.4992	37.0048	52.1766	31.6256	39.8853	27.5553	25.2139	24.8489	25.3011	21.4159	16.5274	23.2693
ENSG00000164741.14_4	DLC1	chr8:12940870-13462119	-	protein_coding	0.74348	1.67421	0.00529174	0.0443807	3.8928	3.14932	15.2402	17.6597	14.3982	17.6005	12.0247	8.50238	8.66561	9.36877	9.63424	9.46929	4.7434	6.61175
ENSG00000164932.12_2	CTHRC1	chr8:104383743-104395225	+	protein_coding	0.678162	1.6001	6.16175e-05	0.00199913	5.8254	5.14724	64.7926	53.5036	56.5929	45.9042	51.0478	64.939	32.4289	30.1887	31.5092	39.6165	39.3516	34.6579
ENSG00000164938.13_2	TP53INP1	chr8:95938200-95961639	-	protein_coding	-0.650608	0.637012	1.99019e-07	4.41047e-05	1.88659	2.5372	2.84182	3.13134	2.81774	2.53267	2.52153	2.39044	4.81359	4.72439	5.25226	4.5452	4.49555	5.03255
ENSG00000165029.15_2	ABCA1	chr9:107543283-107690518	-	protein_coding	0.596755	1.51231	0.00034214	0.00671694	2.14594	1.54919	2.73258	3.32484	3.90489	3.88259	4.02355	2.86978	1.56945	1.69454	2.33385	2.26099	1.48507	2.35853
ENSG00000165171.10_3	METTL27	chr7:73248920-73256865	-	protein_coding	-0.653049	0.635935	0.00111039	0.0153949	1.34225	1.99529	1.11303	1.40927	1.60392	1.01029	1.94601	2.38396	3.10264	2.37279	2.34348	3.4908	3.74606	3.07335
ENSG00000165233.17_2	CARD19	chr9:95858500-95875565	+	protein_coding	-0.659988	0.632883	0.0115845	0.0762293	2.09556	2.75554	2.7324	2.61132	2.59595	3.12922	3.1872	6.27265	4.04886	5.47353	4.55386	6.69765	9.05061	5.75352
ENSG00000165434.7_2	PGM2L1	chr11:74041363-74109518	-	protein_coding	0.777045	1.71362	4.25055e-07	7.03753e-05	3.44443	2.66738	10.4347	10.7265	9.40443	10.219	10.4352	8.29929	5.67207	5.74207	5.61835	4.52475	5.26714	5.37662
ENSG00000165507.8_3	C10orf10	chr10:45466429-45474258	-	protein_coding	-0.697431	0.616669	3.39537e-05	0.00137569	0.752401	1.44983	0.600529	0.344046	0.810791	0.820908	0.617786	0.991668	1.49932	1.36864	1.79226	1.88031	1.87016	2.04114
ENSG00000165802.22_4	NSMF	chr9:140342025-140353786	-	protein_coding	-0.770216	0.58633	0.000145126	0.00372794	3.38634	4.15656	12.6603	9.01982	7.60078	8.38027	8.73858	11.1555	16.4165	17.9354	18.9773	19.9537	13.952	14.5867
ENSG00000166025.17_3	AMOTL1	chr11:94439597-94609918	+	protein_coding	0.715374	1.64191	0.00758031	0.0567363	3.83025	3.11488	14.5972	15.861	15.5703	16.8586	11.4358	7.55748	8.98451	9.34672	9.14705	8.35836	4.71201	6.54351
ENSG00000166106.3_2	ADAMTS15	chr11:130318869-130346536	+	protein_coding	-0.705327	0.613304	0.000152204	0.00384184	0.40006	1.10539	0.332204	0.416668	0.289013	0.166713	0.41372	0.3157	1.39673	1.2387	1.49355	1.44331	0.511029	1.00837
ENSG00000166503.8_4	HDGFL3	chr15:83781490-83876770	-	protein_coding	0.830956	1.77886	1.76492e-06	0.000192303	4.16762	3.33667	16.6653	19.8169	15.7884	18.9736	17.44	13.8155	9.0283	9.58214	8.81759	8.28637	8.66136	10.3745
ENSG00000166710.17_2	B2M	chr15:45003675-45011075	+	protein_coding	-0.677132	0.625407	0.00487292	0.0421943	5.70263	6.37976	81.7656	41.8976	49.9379	51.3316	52.489	38.4114	64.1428	65.8332	96.7799	100.341	85.1662	88.6946
ENSG00000166741.7_3	NNMT	chr11:114128509-114184007	+	protein_coding	0.59742	1.51301	0.0108522	0.0724314	5.70322	5.1058	41.7393	43.6142	43.756	46.5942	63.3419	75.5332	27.8856	31.058	29.4733	27.7079	46.7072	42.1398
ENSG00000166801.15_2	FAM111A	chr11:58910221-58922512	+	protein_coding	-0.652052	0.636375	0.0100563	0.0688048	1.12725	1.7793	1.44135	1.32517	1.48305	1.04069	0.984428	0.903438	4.06253	1.43696	3.06681	3.65181	1.93697	1.38644
ENSG00000166922.8_2	SCG5	chr15:32933877-32989299	+	protein_coding	1.48939	2.80771	1.00943e-06	0.000126906	1.94068	0.45129	2.92922	3.05888	2.46913	4.7294	2.40196	1.96791	0.249143	0.320611	0.445479	0.524572	0.251163	0.436316
ENSG00000166923.10_2	GREM1	chr15:33010175-33037308	+	protein_coding	1.71019	3.27204	1.43497e-07	3.60812e-05	4.85163	3.14144	27.8632	29.3981	23.6908	30.9862	32.615	23.871	8.36406	8.71795	6.37079	6.66753	6.7464	10.8494
ENSG00000166949.15_3	SMAD3	chr15:67356101-67487533	+	protein_coding	-0.645159	0.639422	0.00138808	0.0178529	3.33975	3.98491	10.1616	9.59807	9.93251	9.15211	8.9323	7.25859	17.8762	17.3872	16.9709	16.8239	10.1707	11.6874
ENSG00000166974.12_3	MAPRE2	chr18:32556892-32723434	+	protein_coding	-0.610205	0.655103	0.011217	0.0743723	2.57136	3.18157	5.01228	3.75089	3.36921	4.44525	5.04536	9.73207	9.5317	8.27594	8.58714	8.13417	6.7822	7.37846
ENSG00000167191.11_3	GPRC5B	chr16:19868013-19897489	-	protein_coding	-1.34843	0.39272	2.47952e-07	4.91208e-05	0.631625	1.98005	0.706409	0.556034	0.513649	0.299381	0.496996	0.769063	3.62229	3.63372	3.03477	2.09036	2.71321	2.80161
ENSG00000167657.13_3	DAPK3	chr19:3958451-3971121	-	protein_coding	0.658152	1.57806	0.0175861	0.10215	4.03571	3.37756	10.8031	13.5076	18.7214	11.337	18.8137	22.5789	11.9037	9.16611	7.01947	8.04463	14.9658	7.29636
ENSG00000167767.13_2	KRT80	chr12:52562780-52585784	-	protein_coding	-0.974043	0.509078	5.46985e-05	0.00185281	1.7458	2.71984	2.39231	2.56631	2.69009	2.86852	1.99322	1.75293	5.8445	7.47853	7.09168	4.16423	5.45103	4.22624
ENSG00000167772.11_3	ANGPTL4	chr19:8428173-8439257	+	protein_coding	1.44431	2.72132	2.62487e-06	0.000256121	5.71839	4.27408	58.0316	66.5195	41.7565	66.8806	45.279	38.7914	20.9428	19.7445	16.0461	18.0651	16.0683	19.7735
ENSG00000168140.4_2	VASN	chr16:4421849-4433529	+	protein_coding	1.11939	2.17255	3.49366e-05	0.00139854	2.73223	1.61284	7.96191	6.86038	4.50095	5.94548	5.36858	4.02203	2.13288	2.83397	2.26615	2.20921	1.44882	1.65524
ENSG00000168209.4_2	DDIT4	chr10:74033678-74035794	+	protein_coding	-1.0947	0.468234	5.78845e-05	0.00191605	5.149	6.2437	28.8481	26.7336	43.3627	25.9299	37.8745	50.9021	69.0136	70.0111	75.211	75.3602	83.2091	76.7129
ENSG00000168298.6_2	HIST1H1E	chr6:26156582-26157335	+	protein_coding	-0.718395	0.607773	0.0107198	0.0717672	1.83696	2.55535	2.32848	2.46181	2.41204	2.08047	1.85372	5.01563	3.96604	3.23241	4.66601	4.04612	7.93614	6.68144
ENSG00000168309.16_2	FAM107A	chr3:58549844-58613337	-	protein_coding	-0.690282	0.619733	3.50839e-05	0.00139854	2.24289	2.93317	3.3667	4.60518	3.08525	3.30831	4.52444	3.72616	7.12551	7.32283	6.88751	7.18146	5.88786	5.60483
ENSG00000168310.10_3	IRF2	chr4:185308867-185395734	-	protein_coding	-0.662993	0.631567	1.88283e-05	0.000925487	2.91397	3.57696	7.19331	5.19235	7.39629	5.79904	6.79481	7.11891	12.1177	12.0808	10.3828	9.58719	10.4864	11.16
ENSG00000168461.12_3	RAB31	chr18:9708162-9862548	+	protein_coding	1.14756	2.21539	0.019099	0.108121	4.27029	3.12273	19.4104	20.7924	16.7832	11.366	22.2131	21.7393	2.4694	5.66729	4.91648	17.6738	8.73326	16.5569
ENSG00000168497.4_3	CAVIN2	chr2:192699028-192711981	-	protein_coding	-1.60527	0.328674	1.71541e-08	1.06805e-05	2.62424	4.22951	5.66249	5.14162	5.06453	5.71784	5.62793	3.97203	20.1395	19.814	17.7448	18.4392	14.0133	17.1041
ENSG00000168564.5_2	CDKN2AIP	chr4:184365744-184369351	+	protein_coding	-1.08061	0.472828	0.00178439	0.0212679	1.65978	2.74039	1.20237	3.59119	3.02916	1.11412	2.01186	2.83591	3.7004	7.7532	3.71209	7.63655	5.65052	6.99709
ENSG00000168679.17_3	SLC16A4	chr1:110905470-110933704	-	protein_coding	-0.597856	0.660735	0.000234833	0.00510199	0.970954	1.56881	0.884612	0.721775	1.1538	0.839822	1.10314	1.09734	1.612	1.59493	2.21486	1.86493	2.9279	1.77983
ENSG00000168874.12_2	ATOH8	chr2:85978467-86015189	+	protein_coding	-0.882155	0.542556	4.01618e-06	0.000336613	2.46906	3.35122	4.04243	4.27272	3.60984	5.18911	4.94125	5.39306	7.47257	9.03223	9.87501	10.557	9.16652	9.40028
ENSG00000168994.13_2	PXDC1	chr6:3722848-3752260	-	protein_coding	0.606514	1.52258	0.000141413	0.00366133	5.15062	4.54411	30.5751	36.0489	36.5534	42.9103	31.3818	31.1596	19.8639	22.3122	24.6225	26.5835	19.3881	22.0065
ENSG00000169083.16_3	AR	chrX:66763874-66950461	+	protein_coding	-0.692567	0.618752	2.57991e-06	0.000255548	0.733711	1.42628	0.664341	0.628928	0.768723	0.782355	0.537033	0.609656	1.82543	1.52665	2.25979	1.69282	1.47628	1.42823
ENSG00000169241.17_2	SLC50A1	chr1:155107820-155111333	+	protein_coding	-0.630979	0.645738	0.0103099	0.0702128	3.35593	3.98691	10.1117	7.33482	11.3499	6.72878	8.5027	12.7125	12.4831	12.6832	11.9352	12.8511	22.1547	19.7589
ENSG00000169252.5_2	ADRB2	chr5:148204808-148208250	+	protein_coding	-0.724464	0.605222	3.18284e-06	0.000281187	2.19359	2.91806	3.22844	3.94425	3.60398	4.24951	3.39044	3.13034	5.4764	6.46178	6.44726	7.65592	6.55996	6.91651
ENSG00000169429.10_2	CXCL8	chr4:74606223-74609433	+	protein_coding	-1.55083	0.341315	1.62439e-05	0.000834524	4.10576	5.65659	14.5733	17.7641	14.5341	9.57308	22.8038	21.7984	52.7371	44.5131	46.2845	38.814	57.7096	59.946
ENSG00000169499.14_2	PLEKHA2	chr8:38758753-38831428	+	protein_coding	-0.734945	0.600841	0.00528996	0.0443807	2.36194	3.09689	3.92966	5.82941	4.72809	4.34443	5.38982	1.80214	5.85981	7.75903	8.11688	7.36597	7.01255	9.68151
ENSG00000169756.16_2	LIMS1	chr2:109150811-109303702	+	protein_coding	0.65287	1.57229	0.000813904	0.0122601	3.49441	2.84154	11.0436	8.94391	7.93826	11.0139	12.0604	11.1989	5.41266	5.34191	5.10959	7.37274	8.65873	5.74948
ENSG00000169908.11_3	TM4SF1	chr3:149086809-149095652	-	protein_coding	-0.719897	0.607141	0.00203996	0.0233355	6.14354	6.86344	60.2986	66.4156	62.0508	55.79	87.3863	94.4512	107.576	102.319	95.6879	99.2648	151.502	149.277
ENSG00000169964.7_3	TMEM42	chr3:44903361-44907162	+	protein_coding	-0.670917	0.628107	0.00128988	0.0168989	1.92011	2.59102	2.57555	2.13531	2.51184	2.40052	2.77246	4.81744	4.4029	4.78151	4.41697	4.60409	6.53247	5.69868
ENSG00000169991.10_3	IFFO2	chr1:19230775-19283180	-	protein_coding	0.841547	1.79197	0.000400621	0.00746289	2.19011	1.34857	4.11851	4.65556	4.00993	4.04486	2.89892	2.1659	1.9808	1.7626	1.94612	1.56349	0.940126	1.26043
ENSG00000170379.19_2	TCAF2	chr7:143318043-143427502	+	protein_coding	-0.707324	0.612455	2.24441e-06	0.000229263	0.982276	1.6896	1.16924	1.15427	0.843096	0.842192	0.907161	0.964671	2.63519	2.48436	2.23947	2.20228	1.71426	2.15854
ENSG00000170425.3_2	ADORA2B	chr17:15848231-15879060	+	protein_coding	-0.650368	0.637118	0.00183832	0.0217916	2.63128	3.28165	4.21358	4.70143	4.805	4.43894	5.95908	7.66128	9.0572	8.7474	6.88896	6.92055	11.2804	10.2434
ENSG00000170522.9_2	ELOVL6	chr4:110967002-111120355	-	protein_coding	-0.626158	0.6479	1.32236e-05	0.000744164	1.7486	2.37476	2.61719	2.02711	2.63101	1.96955	2.70278	2.2934	5.07058	4.00968	4.0686	3.58292	4.37564	4.12559
ENSG00000170558.8_3	CDH2	chr18:25530930-25757410	-	protein_coding	1.04853	2.06842	5.89764e-07	8.29461e-05	6.5918	5.54327	106.874	103.847	97.393	98.5729	94.7386	74.9138	46.0619	50.5034	47.5739	45.4379	37.5778	47.7565
ENSG00000170581.13_3	STAT2	chr12:56735381-56753939	-	protein_coding	-0.674857	0.626394	0.00452637	0.0400151	1.70433	2.37918	2.94544	1.81885	3.60712	1.91911	1.52855	2.16666	4.71396	4.154	6.15116	4.69015	3.16025	2.97681
ENSG00000170775.2_2	GPR37	chr7:124386051-124405681	-	protein_coding	0.612763	1.52918	2.39621e-07	4.89472e-05	0.956818	0.344055	0.996268	1.13953	0.798689	0.936325	0.769847	1.03131	0.190282	0.307273	0.307402	0.213709	0.31562	0.287523
ENSG00000170955.9_3	CAVIN3	chr11:6340176-6341877	-	protein_coding	-0.661934	0.632031	0.00525962	0.0442532	4.86045	5.52238	27.2932	24.5526	26.3488	19.9246	32.8153	41.956	38.3185	41.2386	38.6574	43.8935	65.9262	46.6443
ENSG00000170961.6_2	HAS2	chr8:122624356-122653630	-	protein_coding	0.973721	1.9639	0.00137471	0.0177262	2.44609	1.47236	3.12361	3.38461	3.96166	4.20859	7.58042	5.5314	1.28227	1.59082	1.45	1.13857	2.77806	2.89935
ENSG00000170962.12_2	PDGFD	chr11:103777914-104035107	-	protein_coding	-0.627576	0.647263	0.000344359	0.00674087	1.31341	1.94098	1.93546	1.73348	1.03248	1.03416	1.59715	1.73494	3.50918	3.28349	2.83567	2.2557	2.51301	2.78185
ENSG00000171067.10_3	C11orf24	chr11:68028803-68039469	-	protein_coding	0.60738	1.52349	0.00210658	0.0238472	3.43188	2.8245	9.86874	10.9927	9.57323	9.93454	9.0931	9.38649	6.2827	4.26068	4.90598	9.38921	7.20752	5.54847
ENSG00000171223.5_2	JUNB	chr19:12902310-12904129	+	protein_coding	1.49713	2.8228	2.63424e-08	1.26399e-05	5.95925	4.46212	57.1008	57.2637	58.8662	58.1558	60.0215	78.2921	20.4492	17.8309	19.493	23.1179	24.7414	21.3117
ENSG00000171310.10_3	CHST11	chr12:104849073-105155792	+	protein_coding	0.738045	1.66791	0.0433427	0.184836	1.84492	1.10687	1.83722	7.56787	1.41637	1.9531	1.50444	3.94687	0.500544	1.91814	1.20275	1.26277	1.05404	1.22657
ENSG00000171357.5_2	LURAP1	chr1:46669006-46686933	+	protein_coding	-0.621491	0.649999	0.000910646	0.0133184	1.67163	2.29312	1.96662	1.94415	2.59939	1.48632	2.06971	3.35673	3.20085	3.74413	3.81999	3.67022	4.99732	4.15178
ENSG00000171492.14_3	LRRC8D	chr1:90286573-90402170	+	protein_coding	-1.12706	0.457848	0.0451827	0.189834	1.45712	2.58418	0.757609	0.805354	0.776067	0.935525	5.35936	5.1754	6.20137	5.99629	1.03193	5.61693	7.05061	7.52733
ENSG00000171522.5_2	PTGER4	chr5:40679600-40693837	+	protein_coding	-1.43874	0.36889	1.41983e-05	0.000767119	3.52382	4.96256	7.39304	15.4295	9.5886	15.4898	8.86211	8.75172	33.393	33.0408	33.5493	30.4495	25.4176	26.3434
ENSG00000171621.13_2	SPSB1	chr1:9352939-9429591	+	protein_coding	1.52814	2.88414	1.57018e-07	3.73275e-05	4.41461	2.88647	21.7495	23.7088	19.0613	23.1874	17.7034	17.4458	6.97834	7.79072	6.01947	7.58717	5.12316	5.31571
ENSG00000171729.13_2	TMEM51	chr1:15479028-15546976	+	protein_coding	0.790989	1.73026	0.00328648	0.0327022	2.43524	1.64425	3.5473	3.25868	5.12836	4.04347	4.54586	6.54078	2.42299	1.18292	3.49768	1.72118	3.0135	1.54159
ENSG00000171951.4_3	SCG2	chr2:224461658-224467221	-	protein_coding	-1.30112	0.40581	0.000344906	0.00674087	3.3247	4.62582	6.30979	9.63276	6.24237	7.24199	17.0749	11.0632	28.4394	24.2068	17.2588	18.5826	26.7789	29.73
ENSG00000172296.12_3	SPTLC3	chr20:12989627-13149750	+	protein_coding	-0.647459	0.638404	0.000481531	0.00846239	0.875673	1.52313	1.05038	0.679476	0.849784	0.400472	0.949713	1.19406	2.19392	1.92918	1.80333	1.26064	2.45675	1.75048
ENSG00000172331.11_3	BPGM	chr7:134331560-134364565	+	protein_coding	1.28369	2.43462	2.36456e-08	1.25902e-05	5.83228	4.54859	59.3884	60.3198	50.3912	51.5844	60.4441	54.6385	23.0279	21.9363	21.7882	18.7275	22.5511	27.1541
ENSG00000172819.16_3	RARG	chr12:53604351-53626764	-	protein_coding	-0.614547	0.653135	0.0003584	0.00692183	1.36674	1.98129	1.94421	1.32036	1.76551	1.80944	1.31147	1.39754	2.88852	2.91634	3.84024	3.55806	2.02142	2.7328
ENSG00000173193.13_3	PARP14	chr3:122399465-122449687	+	protein_coding	-0.922625	0.527548	2.89811e-05	0.00126309	1.87019	2.79282	2.76608	2.29738	3.68258	2.46126	2.28854	2.60679	7.92391	5.16872	6.80417	6.29539	5.32327	4.58806
ENSG00000173267.13_2	SNCG	chr10:88718375-88723017	+	protein_coding	-0.746002	0.596254	5.59591e-05	0.00186649	4.17189	4.91789	15.2504	14.1011	16.4681	15.3859	18.5055	24.0285	27.6726	28.427	29.7937	28.3187	32.334	29.0532
ENSG00000173334.3_2	TRIB1	chr8:126442563-126450647	+	protein_coding	0.794557	1.73455	3.09017e-05	0.00131356	2.79984	2.00528	6.79333	5.85681	5.88215	7.00129	5.8103	4.69014	3.21413	3.39873	3.24851	3.54266	2.06752	2.81536
ENSG00000173801.16_3	JUP	chr17:39910856-39943183	-	protein_coding	-0.760719	0.590202	0.000752484	0.011616	2.67478	3.4355	6.01184	4.49861	6.45999	6.06583	5.17085	4.40506	11.0508	10.3957	12.886	11.6396	6.57072	7.7886
ENSG00000173926.5_2	MARCH3	chr5:126203406-126366500	-	protein_coding	0.658588	1.57854	0.000366756	0.00701564	3.09484	2.43625	6.1607	8.04169	6.09207	7.29651	9.01415	9.19394	4.13833	4.46236	3.98631	3.45826	5.52522	5.17389
ENSG00000174032.16_3	SLC25A30	chr13:45967451-45992590	-	protein_coding	-0.818125	0.567179	2.62092e-06	0.000256121	1.53989	2.35801	1.33441	1.95248	2.309	2.04085	2.0018	1.90319	4.53969	4.274	4.64298	3.67998	3.53584	4.18751
ENSG00000174791.10_2	RIN1	chr11:66097713-66104311	-	protein_coding	-0.778881	0.582819	8.97786e-06	0.000578254	0.954268	1.73315	0.87071	0.872235	1.0744	0.875476	0.837854	1.11299	2.04994	2.48903	2.4061	3.30087	1.81997	2.07132
ENSG00000174804.3_2	FZD4	chr11:86656721-86666433	-	protein_coding	-0.781064	0.581938	6.52403e-08	2.03099e-05	2.60658	3.38764	4.86749	5.59704	5.06484	4.76847	5.13662	5.14236	9.53308	9.41933	9.75876	7.94741	10.0589	10.2492
ENSG00000175573.6_2	C11orf68	chr11:65684279-65686588	-	protein_coding	-0.800182	0.574277	0.000326308	0.00646865	4.19601	4.99619	16.1305	14.3695	17.3753	15.292	18.1004	24.1803	23.3084	29.3908	28.2867	34.8724	40.8269	31.556
ENSG00000175592.8_3	FOSL1	chr11:65659520-65668044	-	protein_coding	-0.723666	0.605557	0.0154938	0.093698	5.00203	5.7257	35.7989	37.3781	34.6928	40.0308	24.2602	19.7266	67.4425	63.2159	57.4779	67.3816	31.5127	37.432
ENSG00000175602.3_2	CCDC85B	chr11:65657583-65659106	+	protein_coding	-1.2514	0.420042	0.00560306	0.0462208	3.84694	5.09834	11.5867	11.2436	9.62494	8.64742	14.8077	34.5502	23.9354	26.5214	23.9175	35.3526	65.1915	38.2817
ENSG00000176165.10_3	FOXG1	chr14:29229536-29239483	+	protein_coding	-0.688863	0.620343	0.000327985	0.00648775	0.682855	1.37172	0.92101	0.853	0.382174	0.386662	0.868518	0.342527	1.32517	1.65237	1.70052	2.27317	1.34578	1.34842
ENSG00000176435.6_2	CLEC14A	chr14:38723308-38725574	-	protein_coding	-1.0966	0.467618	0.00018339	0.00430551	5.25081	6.34741	35.3963	36.1717	31.7843	25.5837	46.1581	53.8034	77.9996	81.4707	62.8524	67.4926	106.021	94.5771
ENSG00000176454.13_3	LPCAT4	chr15:34650819-34659479	-	protein_coding	-0.650131	0.637222	0.00696425	0.0536896	1.65758	2.30771	2.71644	1.74442	2.66778	2.08439	1.54684	2.35529	4.90274	4.57514	4.72905	5.52774	2.75342	2.18826
ENSG00000176485.11_3	PLA2G16	chr11:63340667-63384355	-	protein_coding	-0.837432	0.559639	0.00362505	0.034622	3.14725	3.98468	5.9484	9.89991	5.10859	7.29898	9.06662	11.5125	15.7286	11.989	10.0845	13.989	19.0461	20.7519
ENSG00000176641.10_3	RNF152	chr18:59475296-59561480	-	protein_coding	0.970193	1.9591	1.18933e-05	0.000688077	2.30334	1.33315	4.10867	5.64351	3.25298	4.17484	3.86751	2.97781	1.525	1.76918	1.51671	1.38198	1.14847	1.84046
ENSG00000176658.16_3	MYO1D	chr17:30819540-31204195	-	protein_coding	0.656934	1.57673	0.00036755	0.00701564	1.17587	0.518937	1.78817	1.56987	1.08702	1.64752	0.856257	0.809678	0.571287	0.517366	0.455483	0.535596	0.257594	0.291586
ENSG00000177076.5_2	ACER2	chr9:19409057-19452018	+	protein_coding	-0.774756	0.584487	2.72033e-06	0.000262803	0.6786	1.45336	0.624816	0.647277	0.63916	0.519633	0.518508	0.660831	1.98434	2.07804	1.48203	2.12035	1.64295	1.24285
ENSG00000177283.7_3	FZD8	chr10:35927177-35931206	-	protein_coding	0.715441	1.64198	5.39436e-05	0.00185258	1.76671	1.05127	2.35044	3.12832	2.27398	2.83748	2.4028	1.62522	0.842218	1.01631	1.19822	1.05938	0.957447	1.40652
ENSG00000177409.11_3	SAMD9L	chr7:92759368-92777682	-	protein_coding	-0.845872	0.556375	0.00111149	0.0153949	1.08091	1.92679	0.891054	0.919026	2.19237	1.1064	1.22458	0.650588	3.83684	3.05054	3.89144	2.55518	1.94346	2.01224
ENSG00000177576.11_3	C18orf32	chr18:47003620-47013622	-	protein_coding	-0.617641	0.651736	0.0373981	0.16873	1.79284	2.41048	1.38317	2.19295	2.52329	1.88763	3.32793	4.16493	2.47441	5.00733	5.25156	3.5109	7.94876	3.28723
ENSG00000177706.8	FAM20C	chr7:192969-300711	+	protein_coding	-1.0356	0.487814	0.000193473	0.00446581	1.77776	2.81336	3.38736	2.27635	2.57592	2.30715	1.90779	2.28823	7.50357	7.48175	7.30084	7.17725	3.56812	4.39361
ENSG00000178343.4_2	SHISA3	chr4:42399856-42404504	+	protein_coding	-0.612358	0.654127	0.000830309	0.0124437	3.23193	3.84429	9.02804	6.81091	9.50378	5.8484	9.72799	10.3784	13.9588	13.8898	14.3878	11.1878	12.8741	14.1492
ENSG00000178695.5_2	KCTD12	chr13:77454301-77460525	-	protein_coding	-0.735356	0.60067	4.4155e-07	7.04057e-05	3.78828	4.52363	12.9906	12.9563	12.0502	12.1605	14.9317	12.0181	22.4976	22.6069	20.8289	20.7463	20.4299	25.2418
ENSG00000178776.4_4	C5orf46	chr5:147260289-147286101	-	protein_coding	1.1717	2.25276	6.85221e-06	0.000482387	3.0298	1.85811	6.32482	9.34955	6.25258	5.33373	8.1513	8.31149	3.09195	3.05108	2.46343	1.93847	3.08544	2.29392
ENSG00000179348.11_3	GATA2	chr3:128198270-128212028	-	protein_coding	-0.768634	0.586973	0.00378771	0.0358093	3.00543	3.77406	7.65982	7.60355	8.61925	8.49722	5.76045	4.82704	14.2372	15.2737	16.6089	15.2787	7.78188	9.50285
ENSG00000179604.9_2	CDC42EP4	chr17:71279763-71308314	-	protein_coding	-0.622872	0.649377	3.26654e-07	5.93195e-05	2.55227	3.17514	4.82989	4.44771	4.81339	4.98609	4.98365	5.15807	8.23229	7.36095	8.01762	8.2642	9.22575	7.236
ENSG00000179750.15_3	APOBEC3B	chr22:39378352-39388809	+	protein_coding	-0.605261	0.657352	0.00411965	0.0377996	4.27128	4.87654	13.7555	19.0332	15.8572	17.4855	21.693	23.8025	29.1676	25.8842	23.8683	22.1332	36.7599	35.4726
ENSG00000179772.7_2	FOXS1	chr20:30432104-30433422	-	protein_coding	0.877154	1.83675	0.000161189	0.00396155	1.09099	0.213837	0.901841	1.16342	1.08892	0.909963	0.70604	2.33638	0.244817	0.145482	0.24724	0	0.071862	0.276571
ENSG00000179862.6_2	CITED4	chr1:41326723-41328038	-	protein_coding	-0.751091	0.594154	0.00237297	0.0259614	4.12762	4.87871	16.4965	13.5066	16.1983	11.6201	16.8124	28.069	24.1078	32.4508	24.7509	30.822	33.6678	26.1746
ENSG00000180340.6_2	FZD2	chr17:42634827-42636938	+	protein_coding	-0.587639	0.665431	0.000930557	0.013534	2.27155	2.85918	3.4689	3.23753	3.82617	2.89352	4.25758	5.77291	5.23405	6.08908	6.27881	6.17309	6.89279	7.01391
ENSG00000181218.5_2	HIST3H2A	chr1:228644680-228645574	-	protein_coding	-0.615658	0.652632	0.0167711	0.0989989	1.46941	2.08507	1.40495	1.68758	1.90288	0.771747	2.36434	3.03113	2.17248	2.50866	2.79384	3.70966	4.34992	4.48354
ENSG00000181885.18_3	CLDN7	chr17:7163222-7167302	-	protein_coding	-0.705585	0.613194	0.00688024	0.0532302	1.08086	1.78644	0.703341	0.878785	1.10031	0.692986	1.09954	2.74956	1.99428	2.02933	1.95887	2.44658	3.86931	2.74123
ENSG00000182307.12_2	C8orf33	chr8:146277764-146281416	+	protein_coding	0.599696	1.5154	0.0187848	0.107207	4.27311	3.67342	10.007	21.5543	16.303	19.7741	23.8727	22.5365	13.3702	9.93163	9.00829	16.5719	11.5432	11.4485
ENSG00000182492.15_2	BGN	chrX:152760397-152775012	+	protein_coding	1.32596	2.50701	0.0304823	0.148162	6.87099	5.54502	203.698	173.049	124.403	175.388	88.8184	35.3339	55.3776	59.7999	63.6387	96.9538	20.3075	21.4002
ENSG00000183386.9_2	FHL3	chr1:38462442-38471278	-	protein_coding	0.835224	1.78413	2.20755e-05	0.00102352	4.80151	3.96628	23.635	27.8041	26.5524	31.6816	26.5167	25.7495	11.3328	16.3202	14.6123	19.011	13.1366	14.4571
ENSG00000183496.5_2	MEX3B	chr15:82334119-82338482	-	protein_coding	1.04384	2.06171	7.57648e-05	0.00230915	1.99364	0.949798	4.27992	3.27318	3.06672	2.43899	2.71817	2.40005	1.25248	1.47157	1.01147	1.0964	0.364498	0.621481
ENSG00000183578.6_3	TNFAIP8L3	chr15:51348795-51397473	-	protein_coding	0.692994	1.61664	9.86865e-05	0.00283588	4.91818	4.22519	27.1906	27.198	25.2082	27.5412	34.5963	35.0981	16.3804	17.8572	15.7188	15.3203	20.2802	21.4906
ENSG00000183688.4_3	RFLNB	chr17:289769-295730	-	protein_coding	0.590203	1.50546	3.15843e-06	0.000280928	4.72182	4.13162	26.6405	26.7258	22.3845	26.6977	26.0173	24.1779	18.3186	18.4439	15.1441	15.602	15.4349	16.5286
ENSG00000184117.11_3	NIPSNAP1	chr22:29950797-29977326	-	protein_coding	-0.610788	0.654839	0.00997582	0.0684333	2.34346	2.95425	3.5564	3.12263	3.74916	2.89934	5.03994	7.13355	6.18475	5.91216	6.19845	5.79039	9.74645	7.3078
ENSG00000184588.17_3	PDE4B	chr1:66258197-66840262	+	protein_coding	-0.616457	0.652271	1.79524e-05	0.000899342	1.03224	1.64869	0.953209	0.949334	0.83302	1.57396	1.06936	0.968618	2.26089	1.93758	2.52421	1.95864	2.09887	2.0701
ENSG00000184785.5_2	SMIM10	chrX:134124968-134126503	+	protein_coding	-0.793507	0.57694	2.35393e-10	7.69442e-07	2.0224	2.8159	3.04132	3.14263	3.0485	2.83297	2.99737	3.32919	6.20777	6.37648	5.78709	5.75098	6.18455	5.9651
ENSG00000184898.6_3	RBM43	chr2:152104454-152118393	-	protein_coding	-0.655951	0.634657	0.00449013	0.0398564	1.18251	1.83846	1.56812	1.46386	1.43308	1.65606	1.1226	0.575194	3.13644	3.14963	3.14405	3.12128	1.40702	1.96496
ENSG00000185418.15_3	TARSL2	chr15:102193801-102264807	-	protein_coding	0.692659	1.61626	0.00476529	0.0416207	1.98926	1.2966	3.93472	4.15598	2.77032	3.53586	2.37432	1.66787	2.02609	1.933	1.43101	1.73964	0.827309	1.03428
ENSG00000185483.11_2	ROR1	chr1:64239693-64647181	+	protein_coding	0.645389	1.56416	0.000171829	0.00414514	3.44132	2.79593	10.412	10.8973	9.91014	11.1415	9.95302	7.34041	6.53691	6.18747	6.26275	6.48947	4.34134	6.12815
ENSG00000185507.19_2	IRF7	chr11:612553-615999	-	protein_coding	-0.616969	0.652039	0.00337894	0.0332679	1.59781	2.21478	2.27707	1.75798	2.51138	1.16347	1.5399	3.40969	3.26377	3.57332	4.10217	3.74116	4.2779	3.01941
ENSG00000185551.14_3	NR2F2	chr15:96869167-96883492	+	protein_coding	-0.595061	0.662017	0.034644	0.160322	3.63688	4.23194	14.5522	12.679	12.3375	13.0652	9.91944	7.50324	25.9705	23.9145	20.1066	18.8638	9.58676	13.7589
ENSG00000185567.6_2	AHNAK2	chr14:105403581-105444694	-	protein_coding	-0.624263	0.648751	0.0165346	0.0979424	0.633221	1.25748	0.825297	0.702058	0.654769	0.548668	0.437287	0.216645	1.89668	1.67751	2.28666	1.89781	0.347244	0.876456
ENSG00000185862.6_3	EVI2B	chr17:29630784-29641130	-	protein_coding	-1.60996	0.327607	6.17764e-08	2.00329e-05	0.688774	2.29874	0.564303	0.852536	0.57956	0.540416	0.647175	0.510247	4.70654	3.61849	4.88312	4.55743	2.74935	3.39159
ENSG00000185955.4_3	C7orf61	chr7:100054238-100061894	-	protein_coding	-0.895718	0.53748	0.000372931	0.00705655	1.88576	2.78148	2.05039	2.45201	1.85563	2.52133	3.55468	4.2811	4.89127	5.058	5.47177	5.73471	8.28377	6.31547
ENSG00000186577.12_4	SMIM29	chr6:34214157-34217247	-	protein_coding	-0.604687	0.657614	0.0272407	0.136989	1.81287	2.41755	2.08038	1.27337	3.2938	2.183	2.85716	4.09496	3.10269	3.38267	3.3152	6.58681	6.42403	4.32141
ENSG00000186918.13_3	ZNF395	chr8:28203102-28260218	-	protein_coding	-0.75065	0.594336	9.50354e-06	0.000600284	1.85955	2.6102	2.40423	2.16432	2.85327	2.79214	2.67357	2.9498	4.19229	4.20395	5.4861	5.9171	5.22645	5.86506
ENSG00000187239.16_2	FNBP1	chr9:132649466-132805473	-	protein_coding	-0.697041	0.616836	0.0148762	0.0908406	2.35777	3.05481	5.09853	5.23086	4.65357	4.96245	2.82108	2.70549	9.50241	9.45289	8.77037	9.16268	4.26196	4.74039
ENSG00000187498.14_3	COL4A1	chr13:110801310-110959496	-	protein_coding	1.49826	2.82503	0.0272877	0.137067	5.91786	4.4196	108.636	77.272	112.336	77.5786	35.7527	16.3863	35.8882	31.2005	33.1114	25.6511	6.59684	10.711
ENSG00000187908.16_2	DMBT1	chr10:124320181-124403252	+	protein_coding	-0.594422	0.66231	0.000326525	0.00646865	0.585909	1.18033	0.44527	0.560223	0.661056	0.595719	0.379673	0.386771	1.50904	1.488	1.66628	1.40939	0.706192	0.98012
ENSG00000187957.7_2	DNER	chr2:230222345-230579274	-	protein_coding	0.696504	1.62057	0.00544633	0.0452995	5.60886	4.91236	72.1652	56.404	47.7649	43.3428	43.4128	32.4913	38.0041	36.6437	28.3397	25.5105	21.9333	27.475
ENSG00000188613.6_2	NANOS1	chr10:120789228-120793244	+	protein_coding	-0.608293	0.655972	1.14966e-06	0.000139183	0.454993	1.06329	0.274976	0.255691	0.438323	0.469301	0.340397	0.462895	1.08457	1.09094	1.16338	1.31974	0.872668	1.03279
ENSG00000189057.10_3	FAM111B	chr11:58874658-58894883	+	protein_coding	-0.631541	0.645487	0.00518545	0.0438131	3.44915	4.08069	11.7881	10.3853	11.885	10.9856	7.93696	7.44684	20.9424	17.5009	19.1596	16.7126	12.8363	10.7002
ENSG00000189058.8_3	APOD	chr3:195295573-195311076	-	protein_coding	-0.603617	0.658102	0.0247085	0.1281	3.11948	3.7231	9.45964	10.0063	7.61259	5.33172	8.44231	6.26866	15.4092	18.3876	13.6838	12.2389	6.7211	10.1072
ENSG00000189221.9_2	MAOA	chrX:43514155-43606071	+	protein_coding	-1.12762	0.45767	4.30366e-08	1.60772e-05	3.555	4.68262	10.3696	9.4059	10.8608	9.59004	11.9799	12.6665	23.2226	26.4131	23.2089	23.1865	27.4878	24.8976
ENSG00000196352.14_3	CD55	chr1:207494853-207560149	+	protein_coding	-0.631219	0.645631	1.5302e-05	0.000803509	3.65523	4.28645	11.4011	11.9711	9.84828	10.1698	13.6419	13.0138	20.4522	18.7915	16.9434	17.0809	18.9189	19.1258
ENSG00000196812.4_2	ZSCAN16	chr6:28092338-28097860	+	protein_coding	-0.69537	0.617551	0.000443963	0.00798462	2.09742	2.79279	2.58512	4.49854	3.23757	4.09901	3.21966	2.4173	4.61674	5.51262	7.11054	5.83875	6.86724	5.93726
ENSG00000197442.9_2	MAP3K5	chr6:136878185-137113656	-	protein_coding	-0.902634	0.534909	7.54455e-06	0.000505872	2.83554	3.73817	7.02473	5.42326	6.87998	6.70827	5.41067	5.59051	13.8891	13.301	14.0481	13.3181	9.67126	10.5343
ENSG00000197457.9_2	STMN3	chr20:62271058-62289035	-	protein_coding	-0.601871	0.658899	0.0219652	0.118382	2.47281	3.07468	2.34519	3.44946	5.02965	5.71923	6.15639	5.78109	5.7511	5.02864	7.69663	9.5845	8.74031	8.80017
ENSG00000197461.13_3	PDGFA	chr7:536895-559933	-	protein_coding	1.01678	2.0234	0.00399492	0.0369964	2.85205	1.83527	7.53163	6.86264	7.69451	9.55972	4.28557	3.35241	3.20379	3.23076	3.28953	3.65388	1.08085	1.79451
ENSG00000197971.14_4	MBP	chr18:74690783-74845639	-	protein_coding	-0.819712	0.566555	3.01118e-08	1.31237e-05	1.21547	2.03518	1.37259	1.17716	1.20333	1.21886	1.42244	1.56319	3.52265	3.16124	2.84686	2.80959	3.24835	3.04655
ENSG00000198053.11_2	SIRPA	chr20:1874813-1921238	+	protein_coding	0.675695	1.59737	0.00994207	0.0683833	4.34562	3.66993	22.6977	22.5879	21.2862	23.8405	16.3494	12.1552	13.3035	14.9046	13.3124	14.5356	7.45963	8.93558
ENSG00000198431.15_3	TXNRD1	chr12:104609557-104744083	+	protein_coding	-0.846047	0.556307	0.000385587	0.00725402	5.94422	6.79026	55.799	59.2649	40.265	75.2134	75.0907	65.5232	116.331	114.971	116.01	80.3804	118.737	117.497
ENSG00000198435.3_3	NRARP	chr9:140194934-140196703	-	protein_coding	0.615109	1.53167	0.0017033	0.0205449	2.42302	1.80791	5.0611	4.53575	4.48614	4.66113	3.64495	3.91503	2.89507	2.51096	2.06496	4.03065	1.57906	2.3881
ENSG00000198721.12_3	ECI2	chr6:4115923-4135831	-	protein_coding	-0.759675	0.590629	9.8326e-05	0.00283175	4.86974	5.62941	26.1022	24.8351	24.7757	26.16	33.3287	36.1201	47.1785	44.6423	43.3147	43.0442	57.4573	57.6457
ENSG00000198768.10_2	APCDD1L	chr20:57034157-57090187	-	protein_coding	1.29002	2.44532	0.000107167	0.00301984	4.80959	3.51957	36.2549	34.3159	25.7849	27.3011	22.726	19.5549	13.5322	15.6749	11.003	9.10481	7.01832	8.6534
ENSG00000198805.11_3	PNP	chr14:20937113-20945253	+	protein_coding	0.601319	1.5171	8.8361e-05	0.00261977	4.71152	4.1102	22.0328	25.1452	24.0155	25.2486	27.6703	27.5342	14.5854	15.2419	14.6114	15.358	21.3041	17.4014
ENSG00000198846.5_3	TOX	chr8:59717977-60031767	-	protein_coding	-0.899403	0.536109	5.06597e-06	0.000389633	3.49411	4.39352	10.6708	11.6922	10.2626	11.1855	9.99062	8.15916	22.2857	23.4487	20.8965	19.4977	15.9195	18.9374
ENSG00000198959.11_2	TGM2	chr20:36755789-36794980	-	protein_coding	-0.727048	0.604139	3.23288e-05	0.00134618	5.85488	6.58193	52.058	56.2363	53.2293	55.8711	68.4891	56.7426	102.451	105.27	103.185	101.59	72.2152	88.8441
ENSG00000204397.7_4	CARD16	chr11:104912053-104972158	-	protein_coding	-0.884487	0.54168	4.61265e-06	0.000367746	3.49607	4.38056	9.26705	10.9499	10.7739	9.016	11.6466	10.2755	21.1479	23.9448	17.7555	15.6477	20.6126	20.9066
ENSG00000204634.12_3	TBC1D8	chr2:101624079-101869328	-	protein_coding	-1.06589	0.477678	0.00442383	0.0394554	2.47257	3.53846	4.81615	5.01498	6.23077	5.93451	2.9859	3.1813	14.1118	11.6981	15.3052	15.9453	6.10409	5.53362
ENSG00000205213.13_2	LGR4	chr11:27387508-27494322	-	protein_coding	-0.791598	0.577704	0.00145645	0.0184347	2.03493	2.82653	3.15302	2.73902	3.11319	3.24875	3.36708	2.99664	7.7419	2.86386	7.0387	6.55367	6.35816	7.4426
ENSG00000205413.7_3	SAMD9	chr7:92728826-92747336	-	protein_coding	-0.798376	0.574996	6.63757e-05	0.00210136	2.35122	3.1496	3.81286	3.076	4.79167	3.65116	5.13797	4.4413	9.18871	7.67332	8.75083	6.02846	8.80764	7.22185
ENSG00000211455.7_3	STK38L	chr12:27396901-27478892	+	protein_coding	0.972896	1.96278	0.000800557	0.0121571	3.15928	2.18638	9.6016	4.94877	9.42199	8.62927	8.75548	7.2345	5.02554	2.98392	4.53544	3.93397	1.82761	3.79655
ENSG00000213085.9_3	CFAP45	chr1:159842154-159869953	-	protein_coding	0.737257	1.667	0.00035477	0.00688088	2.08755	1.35029	3.84057	4.12268	3.49551	3.77405	2.16523	2.49963	1.59827	2.07949	1.82409	1.12914	1.39327	1.38578
ENSG00000213160.9_4	KLHL23	chr2:170550998-170633499	+	protein_coding	-0.59329	0.662829	0.0482633	0.198192	1.42262	2.01591	2.02644	1.59579	2.70323	2.13395	0.484037	1.74276	3.80298	3.8414	4.41847	1.22008	2.92057	2.99044
ENSG00000213185.6_3	FAM24B	chr10:124608594-124639157	-	protein_coding	-0.616624	0.652195	0.00871931	0.0622851	1.97176	2.58839	2.28445	2.06081	3.1836	3.08656	2.14002	5.74863	4.26936	4.30002	5.12092	6.04	5.81726	4.76839
ENSG00000213626.11_2	LBH	chr2:30454397-30546596	+	protein_coding	1.6277	3.09019	9.44721e-05	0.00275501	3.11055	1.48286	3.15466	10.4125	6.54628	9.62762	9.3696	9.52862	1.59516	2.10669	0.950232	1.61818	2.48162	2.32643
ENSG00000213648.10_3	SULT1A4	chr16:29471210-29476297	+	protein_coding	-0.806747	0.571669	0.00427046	0.0386348	1.98519	2.79193	2.69506	1.89042	2.63543	2.45873	3.54715	5.30685	4.48882	5.38968	5.38208	4.46604	9.03809	7.98448
ENSG00000213793.5_3	ZNF888	chr19:53407670-53426734	-	protein_coding	-0.592426	0.663227	0.0332449	0.156237	0.805162	1.39759	0.513756	1.64511	0.434029	0.40726	0.848164	0.905883	2.43876	1.76389	2.23545	1.91953	0.383101	1.69321
ENSG00000213928.8_3	IRF9	chr14:24630262-24635774	+	protein_coding	-0.876411	0.544721	0.00101152	0.0144385	1.71576	2.59218	3.00338	2.52086	3.57922	1.30768	1.84221	1.96675	4.86454	4.41301	6.65636	3.3479	5.16608	6.3782
ENSG00000215114.8_2	UBXN2B	chr8:59323823-59364060	+	protein_coding	-0.595452	0.661837	0.000274182	0.00567765	1.56368	2.15913	1.83677	1.86059	2.75321	2.08409	1.5588	1.77608	3.39958	3.45018	4.29244	4.06896	2.97946	2.79827
ENSG00000215472.10_3	RPL17-C18orf32	chr18:47008051-47018849	-	protein_coding	1.11423	2.16479	0.017679	0.102598	4.76643	3.65221	28.4092	24.0107	26.4677	23.9418	25.4741	29.4689	26.5884	6.88682	6.67934	7.35943	8.01494	30.3652
ENSG00000221963.5_2	APOL6	chr22:36044442-36064456	+	protein_coding	-0.752098	0.59374	0.000154119	0.00385633	1.46898	2.22108	2.45498	2.01608	1.92675	1.31162	1.64028	1.4177	4.44736	4.31773	4.26142	3.32369	2.74337	3.16423
ENSG00000251493.4_3	FOXD1	chr5:72740654-72744352	-	protein_coding	0.619246	1.53607	0.001977	0.0228755	1.48285	0.863607	1.17713	1.64297	1.51738	2.28858	2.23075	2.09788	0.470581	0.440311	0.804327	0.904102	1.21011	1.25666
ENSG00000253368.3_3	TRNP1	chr1:27320198-27327389	+	protein_coding	-0.610067	0.655166	0.0120962	0.0786461	3.8598	4.46987	10.4671	13.0166	11.2021	11.2673	16.8645	20.7887	18.0115	20.3135	17.1656	17.7608	29.4256	27.1826
ENSG00000256977.6	LIMS3	chr2:110656005-110677180	+	protein_coding	0.693175	1.61684	0.00510069	0.0435892	1.1887	0.495525	1.70885	1.91491	0.556052	1.00997	0.820988	2.11943	0.29568	0.403845	0.289261	0.30236	0.299524	0.978492
ENSG00000257093.6_3	KIAA1147	chr7:141356528-141401953	-	protein_coding	0.779258	1.71625	0.000112603	0.00312587	2.1997	1.42044	4.0695	3.18685	4.39032	4.0305	3.51522	2.61655	1.81383	1.90506	2.06935	2.01087	1.07474	1.34647
ENSG00000258659.6_3	TRIM34	chr11:5640994-5665628	+	protein_coding	-0.658565	0.633508	0.00158518	0.0195532	1.49256	2.15112	2.31125	1.83452	1.26506	1.95388	1.92514	1.70232	5.32851	2.38973	3.80027	3.2805	2.58088	3.86519
ENSG00000260371.1_4	AC026464.3	chr16:69368994-69390209	-	protein_coding	-0.705137	0.613384	0.0197579	0.110623	0.0660433	0.77118	0.033808	0.018248	6.5e-05	0.000718	7e-05	0.249172	1.21751	0	1.22712	0.949447	0	1.56667
ENSG00000261052.5_3	SULT1A3	chr16:30210549-30215631	+	protein_coding	-0.671168	0.627998	0.00502304	0.0431613	1.48233	2.1535	1.84743	1.42366	1.645	0.902653	2.21479	3.26088	3.30438	3.11457	3.13811	2.62039	4.09348	4.7386
ENSG00000265808.3_1	SEC22B	chr1:145096413-145118353	+	protein_coding	-0.590805	0.663972	6.57323e-06	0.000472599	4.73956	5.33037	23.6277	24.8853	25.056	26.3544	29.3511	25.3584	36.0118	39.9185	39.6245	35.92	38.2371	46.5991
ENSG00000265972.5_2	TXNIP	chr1:145438469-145442635	+	protein_coding	-1.83114	0.281043	1.35548e-07	3.60812e-05	3.81139	5.64253	10.2857	18.2959	10.5834	15.6725	14.261	10.9301	53.9943	53.0714	46.5277	45.8201	43.785	51.4347
ENSG00000268800.1	AC112205.1	chr5:162866447-162873821	-	protein_coding	-1.18568	0.439616	8.62309e-10	1.87911e-06	0	1.18568	0	0	0	0	0	0	1.38117	1.14756	1.31251	1.10335	1.09872	1.65383
ENSG00000270757.1_3	HSPE1-MOB4	chr2:198365137-198415450	+	protein_coding	0.720929	1.64824	0.0348727	0.161003	2.09098	1.37005	5.05602	3.5649	2.02034	2.3324	1.89863	6.41417	3.21942	0.993928	0.730554	1.68848	2.03201	1.5129
ENSG00000271605.1	MILR1	chr17:62461569-62464760	+	protein_coding	-0.741459	0.598134	6.15055e-05	0.00199913	1.06483	1.80629	0.912881	0.745136	1.13117	1.18575	1.66974	1.01872	2.48066	2.55024	2.07315	3.23443	2.75034	2.03473
ENSG00000278677.1_3	HIST1H2AM	chr6:27860535-27860927	-	protein_coding	-0.742689	0.597624	0.00942883	0.0660675	2.679	3.42169	3.41341	5.54004	5.44192	4.14571	5.59605	9.93084	8.09722	8.18836	8.06347	8.62828	15.464	11.6084

## Sheet: Static- HMEC-1 vs hCMEC-D3
#log2FC >= 0.585 #p-value cut-off <= 0.05 #q-value cut-off <= 1.00 #Gene biotype: protein_coding #Condition pair: up_MS_vs_BS Column A: Track_id, The database name in gene level. Column B: Gene_Name, The name of gene. Column C: Locus, The genomic coordinates of gene. Column D: Strand, Strand of the gene. Column E: Gene_Type, The biological type of gene. Column F: log2FC, if the comparison is test…
Annotation					DE Statistic				FPKM
Track_id	Gene_Name	Locus	Strand	Gene_Type	log2FC	Fold_Change	p_value	q_value	MS_FPKM	BS_FPKM	BSA	BSB	BSC	BSD	BSE	BSF	MSA	MSB	MSC	MSD	MSE	MSF
ENSG00000000971.15_2	CFH	chr1:196621008-196716634	+	protein_coding	-3.86993	0.0683966	1.04363e-09	6.38593e-08	0.363177	4.23311	22.8548	17.5005	26.8277	18.4953	12.1004	13.1027	0.457742	0.332273	0.210271	0.378949	0.206282	0.158267
ENSG00000001460.17_2	STPG1	chr1:24683489-24743424	-	protein_coding	0.908094	1.87656	6.33857e-08	1.61978e-06	1.74219	0.834098	0.86995	0.775644	0.974658	0.516735	0.934161	0.66898	2.11195	2.30808	2.30045	2.36268	2.53362	2.47237
ENSG00000001461.16_2	NIPAL3	chr1:24742284-24799466	+	protein_coding	0.611447	1.52779	3.57551e-05	0.000276752	3.21067	2.59923	4.86542	5.55038	5.0264	3.98017	5.43053	5.67661	7.79846	7.37433	7.44893	8.31124	9.15868	9.69181
ENSG00000002549.12_2	LAP3	chr4:17578815-17609595	+	protein_coding	-1.77296	0.292607	1.31796e-08	4.44071e-07	3.34236	5.11532	36.3908	32.5419	28.345	28.9645	36.3289	41.1363	10.2959	9.02836	9.21954	9.15384	10.2329	7.24519
ENSG00000003096.14_3	KLHL13	chrX:117031776-117251303	-	protein_coding	2.45726	5.49174	1.65423e-13	1.50491e-10	2.4804	0.0231376	0.0326914	0.0402352	0	0.015409	0	0.00936341	4.22032	5.0615	4.65309	3.93926	4.81884	4.87473
ENSG00000003147.17_2	ICA1	chr7:8152814-8302317	-	protein_coding	-0.811154	0.569926	6.43303e-11	8.44088e-09	0.0833241	0.894478	0.848648	0.853275	0.775115	0.843718	1.01391	0.827399	0.0378083	0.0380942	0.0904233	0.0584427	0.0437918	0.0896022
ENSG00000003987.13_2	MTMR7	chr8:17155539-17271037	-	protein_coding	-1.08401	0.471715	2.24063e-09	1.09199e-07	0.103333	1.18734	1.60458	1.25742	1.39232	1.09008	1.10903	1.24979	0.12633	0.0386982	0.052347	0.140174	0.04105	0.0516747
ENSG00000003989.17_4	SLC7A2	chr8:17354597-17428082	+	protein_coding	-3.31188	0.100699	7.57364e-05	0.000512903	2.5111	5.82298	62.9491	15.0527	74.4526	59.6001	75.3282	90.8631	2.52207	11.0416	2.01394	7.24363	8.31823	2.49487
ENSG00000004799.7_2	PDK4	chr7:95212811-95225803	-	protein_coding	-1.48226	0.357929	1.3411e-10	1.34305e-08	0.228819	1.71107	2.38063	2.11613	2.71036	2.07396	2.23258	2.17126	0.123936	0.165819	0.261725	0.0878308	0.131778	0.272413
ENSG00000005073.5_2	HOXA11	chr7:27221129-27224842	-	protein_coding	1.67453	3.19216	1.1404e-10	1.24495e-08	1.67453	0	0	0	0	0	0	0	2.73174	2.09602	2.4335	2.13708	2.10966	1.73413
ENSG00000005189.19_3	REXO5	chr16:20817751-20860990	+	protein_coding	-0.80854	0.57096	3.88759e-06	4.44678e-05	1.5227	2.33124	3.6975	3.26034	4.21619	4.67163	4.3063	4.16981	1.43062	1.91442	2.09335	1.58119	2.09995	2.20922
ENSG00000005238.19_2	FAM214B	chr9:35104109-35116338	-	protein_coding	0.982913	1.97645	3.26251e-06	3.86285e-05	3.15527	2.17236	4.15844	4.16953	3.74164	3.75834	2.45831	3.03132	8.38993	7.83655	7.91597	7.96442	6.62527	8.88761
ENSG00000005243.9_3	COPZ2	chr17:46103533-46115392	-	protein_coding	0.921907	1.89462	0.0011721	0.00501707	3.37791	2.456	4.48801	4.30454	4.07852	4.67968	4.20759	5.24055	9.65285	6.9963	7.83917	6.01606	13.109	15.9339
ENSG00000005249.12_2	PRKAR2B	chr7:106685094-106802256	+	protein_coding	-2.72363	0.151393	2.68119e-13	1.92566e-10	0.583051	3.30668	9.70374	9.32895	9.05388	7.84438	8.32932	9.23329	0.430931	0.610423	0.558269	0.434997	0.395821	0.571137
ENSG00000005469.11_2	CROT	chr7:86974997-87029111	+	protein_coding	-0.957542	0.514933	1.45904e-08	4.8443e-07	1.31351	2.27106	4.02618	3.78825	4.15562	4.05873	3.28084	3.7062	1.5614	1.27071	1.78454	1.54566	1.41273	1.36997
ENSG00000006016.10_2	CRLF1	chr19:18683030-18718551	-	protein_coding	2.0674	4.19132	6.99656e-07	1.11667e-05	3.38889	1.32148	2.1714	1.90596	2.12055	1.50262	0.623533	1.08549	7.88558	9.4379	8.75839	7.61705	12.5765	11.4772
ENSG00000006451.7_3	RALA	chr7:39663082-39747723	+	protein_coding	0.594819	1.51028	5.6247e-05	0.000400944	5.75128	5.15646	34.6043	34.9131	30.6871	28.2576	40.1353	41.209	52.7819	51.5247	51.0892	51.2696	52.311	58.5706
ENSG00000006468.13_2	ETV1	chr7:13930853-14031050	-	protein_coding	-0.88069	0.543108	1.69409e-09	9.03028e-08	0.0273794	0.90807	0.683988	0.883437	0.94659	0.788022	1.07601	0.905327	0.0193929	0.0274058	0.0330937	0.00846075	0.0269986	0
ENSG00000006534.15_2	ALDH3B1	chr11:67776048-67796749	+	protein_coding	-1.19721	0.436117	2.74536e-05	0.00022433	1.35607	2.55329	6.00179	6.28577	6.11977	4.28794	3.89084	3.35387	1.49353	0.950506	1.40122	1.63239	2.23263	1.83146
ENSG00000006756.15_2	ARSD	chrX:2822011-2847392	-	protein_coding	-1.10129	0.4661	1.93527e-07	3.95065e-06	0.745142	1.84643	2.55085	2.67847	2.95931	2.61179	2.51899	2.29021	0.611384	0.381389	0.595644	0.646551	1.0594	0.841166
ENSG00000006757.11_2	PNPLA4	chrX:7866288-7895780	-	protein_coding	-0.809656	0.570518	0.000522498	0.002523	1.40109	2.21074	3.37033	2.91771	3.21861	3.92773	4.32555	4.19128	1.15757	1.33431	1.39142	1.1978	2.29577	2.88949
ENSG00000007933.12_3	FMO3	chr1:171060018-171086959	+	protein_coding	-0.761105	0.590044	1.03395e-07	2.40363e-06	0	0.761105	0.66083	0.58865	1.04143	0.723699	0.588113	0.607168	0	0	0	0	0	0
ENSG00000008083.13_2	JARID2	chr6:15246527-15522271	+	protein_coding	-0.733295	0.601528	0.00437019	0.0150862	1.05078	1.78408	3.03112	2.71346	3.04334	3.3372	1.37612	1.6751	1.46247	1.33177	1.42887	1.34663	0.417663	0.703819
ENSG00000008256.15_2	CYTH3	chr7:6201407-6312275	-	protein_coding	1.05295	2.07476	3.93322e-06	4.4952e-05	4.65822	3.60527	12.3619	12.7539	12.8284	12.6035	8.13298	9.2906	23.0457	23.6156	26.4614	26.9088	21.6308	24.2446
ENSG00000008311.14_2	AASS	chr7:121715701-121784334	-	protein_coding	-0.807324	0.571441	0.00155096	0.00631961	1.986	2.79332	6.38994	6.48893	7.79449	7.61621	4.1353	4.15334	3.48813	3.21182	3.34607	3.73822	2.69222	1.68866
ENSG00000008394.12_3	MGST1	chr12:16500076-16762193	+	protein_coding	-2.03607	0.243826	7.57132e-09	2.85409e-07	1.1971	3.23318	8.66945	8.73099	6.74273	7.40478	9.53235	9.72005	1.63682	1.28092	1.48155	1.29923	1.45317	0.725683
ENSG00000008517.16_4	IL32	chr16:3115298-3132193	+	protein_coding	-2.07216	0.237803	8.26232e-09	3.04723e-07	2.78453	4.85669	27.4127	25.4172	24.1904	24.5625	36.2719	31.8424	5.76737	5.52467	5.93013	7.19476	4.65445	6.546
ENSG00000008838.19_3	MED24	chr17:38175350-38217468	-	protein_coding	-0.719239	0.607418	3.86957e-05	0.00029516	2.61304	3.33228	9.60904	10.9305	7.89516	11.1236	8.27657	7.2448	4.84022	5.5601	4.69962	5.81715	4.95145	4.91838
ENSG00000009844.15_2	VTA1	chr6:142468299-142545826	+	protein_coding	-0.657776	0.633855	8.23165e-05	0.000547372	3.60724	4.26501	20.336	19.8176	18.0257	17.3652	20.2498	14.3161	10.7248	10.4559	9.75091	10.5621	14.0578	12.0299
ENSG00000010219.13_3	DYRK4	chr12:4671370-4724468	+	protein_coding	-1.28201	0.411224	5.61373e-09	2.22043e-07	0.013097	1.2951	1.36695	1.51653	1.13892	1.32665	2.05151	1.41411	0.0131297	0	0.0112688	0	0	0.03068
ENSG00000010438.16_3	PRSS3	chr9:33750464-33799229	+	protein_coding	-1.10011	0.46648	0.00368394	0.0130159	2.5674	3.66752	8.71175	10.7565	9.94867	9.43246	19.3365	14.8707	4.45267	5.80111	2.45478	3.09862	7.87884	8.30229
ENSG00000010704.18_4	HFE	chr6:26087509-26098571	+	protein_coding	-0.778649	0.582912	0.000267495	0.00145516	0.440884	1.21953	1.63637	1.49469	0.737913	1.94922	1.58467	0.830354	0.662935	0.338061	0.24842	0.281911	0.248062	0.407699
ENSG00000011028.13_2	MRC2	chr17:60704762-60770958	+	protein_coding	1.7219	3.29871	0.000399865	0.00202394	3.64613	1.92423	3.86118	3.88707	3.94879	3.57456	1.30142	1.41473	12.4135	14.7402	16.447	17.2895	8.16445	5.2372
ENSG00000011422.11_3	PLAUR	chr19:44150247-44174699	-	protein_coding	1.14143	2.206	5.04813e-07	8.53616e-06	4.12406	2.98263	6.03247	6.63715	7.61089	6.80198	7.15926	7.28356	13.6525	15.8992	15.1779	16.0137	22.2702	16.7214
ENSG00000011454.16_3	RABGAP1	chr9:125703112-125867145	+	protein_coding	0.586275	1.50137	0.00126859	0.00535771	3.18632	2.60004	5.00607	5.66489	6.29193	5.53962	4.15269	4.05049	8.42096	8.42785	9.62428	9.85895	6.86601	6.05854
ENSG00000011638.10_3	TMEM159	chr16:21169698-21191937	+	protein_coding	0.643279	1.56188	0.000639471	0.0030049	2.14004	1.49676	1.37214	2.05	1.78804	1.38355	3.04009	1.60049	2.99241	3.32728	3.82167	3.06657	3.21664	4.13391
ENSG00000013288.8_2	MAN2B2	chr4:6576902-6625089	+	protein_coding	-0.872148	0.546333	0.00494991	0.0167318	1.44162	2.31377	5.31204	4.88022	5.30007	5.071	1.9779	2.57279	1.82277	1.96994	2.59534	2.2287	1.19651	0.878915
ENSG00000013297.10_3	CLDN11	chr3:170136653-170578169	+	protein_coding	-1.99492	0.250881	2.15602e-05	0.000182512	1.94866	3.94358	11.9702	13.0858	13.0679	16.6442	17.6298	14.7055	1.63801	3.27343	1.77572	2.014	7.36099	3.19567
ENSG00000013364.18_3	MVP	chr16:29831715-29859360	+	protein_coding	-0.699287	0.615876	1.01962e-05	9.7572e-05	4.45001	5.1493	32.3343	33.9815	31.9013	36.8329	35.458	36.7533	18.4047	18.5372	19.8737	20.094	26.3333	22.8949
ENSG00000013563.13_3	DNASE1L1	chrX:153629579-153640449	-	protein_coding	0.620396	1.5373	0.0411554	0.0957409	3.65662	3.03622	5.76401	9.07112	5.43896	9.09998	10.1328	5.17925	8.32071	8.57999	8.46301	12.1026	21.7942	14.9397
ENSG00000013583.8_3	HEBP1	chr12:13127798-13153207	-	protein_coding	0.717144	1.64392	0.000183621	0.00105503	4.05096	3.33381	8.96679	9.26115	7.55878	9.18329	9.96093	9.7539	13.8472	14.7277	14.2223	12.2665	20.7795	19.1912
ENSG00000013619.13_3	MAMLD1	chrX:149529689-149682448	+	protein_coding	0.585993	1.50107	0.0140109	0.0397737	1.11567	0.529676	0.69987	0.538364	0.593798	0.672757	0.111204	0.168301	1.61165	1.49935	1.7419	1.49359	0.440831	0.610156
ENSG00000014914.20_2	MTMR11	chr1:149900543-149908762	-	protein_coding	-1.42072	0.373525	8.32511e-08	2.00715e-06	1.01565	2.43637	3.33015	4.32444	5.8528	5.07923	4.39066	3.85718	1.12575	1.18701	1.07469	0.994664	0.976562	0.796157
ENSG00000015475.18_2	BID	chr22:18216904-18257536	-	protein_coding	0.648875	1.56794	0.00330107	0.0118981	4.11226	3.46338	9.23485	9.61202	8.29914	8.14363	14.3234	11.7261	13.7746	14.5997	13.8581	14.3733	21.3937	21.698
ENSG00000015568.12_2	RGPD5	chr2:110550335-110615272	+	protein_coding	0.689781	1.61304	0.00124282	0.00527347	1.68009	0.990309	1.13655	1.07293	1.32781	1.27833	0.570182	0.666719	2.58932	2.36895	2.82489	2.81336	1.51795	1.43817
ENSG00000017483.14_3	SLC38A5	chrX:48316920-48328644	-	protein_coding	-2.47929	0.179333	1.93861e-07	3.95065e-06	0.785081	3.26437	5.33428	6.51097	8.24933	9.28257	15.1404	9.77756	0.623498	1.03229	0.62764	0.610171	0.677806	0.80463
ENSG00000020181.17_2	ADGRA2	chr8:37641709-37702414	+	protein_coding	0.747729	1.67915	0.000551172	0.0026372	0.965715	0.217986	0.181592	0.199497	0.252113	0.231653	0.0268032	0.103154	1.08617	1.35751	1.22947	1.41994	0.565284	0.336139
ENSG00000021355.12_2	SERPINB1	chr6:2832566-2842240	-	protein_coding	-2.67688	0.156379	3.15797e-10	2.47891e-08	1.38882	4.0657	14.1614	13.8144	14.0818	14.2989	20.8418	18.4785	1.8454	1.83579	1.39386	1.69364	1.31898	1.67245
ENSG00000023445.13_2	BIRC3	chr11:102188181-102210134	+	protein_coding	-1.58173	0.334082	8.98676e-07	1.36563e-05	2.20898	3.7907	14.2414	12.3731	16.3156	12.8049	11.5458	10.4938	3.88581	3.61588	4.21282	5.19777	2.55845	2.7675
ENSG00000023909.9_2	GCLM	chr1:94350761-94375012	-	protein_coding	-0.675017	0.626325	1.26668e-05	0.000116555	3.51736	4.19237	17.5781	18.4245	17.6433	16.9011	16.7273	16.4898	10.7829	10.2783	11.1595	13.1293	8.34273	9.5676
ENSG00000025708.13_3	TYMP	chr22:50964181-50968485	-	protein_coding	-1.63038	0.323004	5.42245e-07	9.05688e-06	1.0183	2.64868	4.16635	4.84517	4.68669	4.7636	7.38122	6.33076	0.813441	0.734283	0.881445	0.923962	1.25842	1.68609
ENSG00000025772.7_2	TOMM34	chr20:43570771-43589127	-	protein_coding	-1.049	0.483303	2.37941e-07	4.6989e-06	5.14723	6.19623	71.3911	79.6755	70.1592	75.6491	63.3092	74.8692	34.2522	39.0493	38.111	35.6011	33.458	27.4417
ENSG00000026036.21_3	RTEL1-TNFRSF6B	chr20:62290653-62330037	+	protein_coding	-1.17132	0.444016	0.00482781	0.0164045	0.460641	1.63196	0.986753	2.43075	3.50608	3.60396	3.54662	0.378653	0.390671	0.171735	0.712071	0.383017	0.0187509	0.727947
ENSG00000026103.21_3	FAS	chr10:90750339-90775542	+	protein_coding	-1.32401	0.399424	2.77937e-05	0.000226523	1.20308	2.52709	6.48611	4.61271	5.73145	4.55625	5.79025	2.4369	0.975525	1.45977	1.4202	1.36247	1.76035	0.941856
ENSG00000026508.17_4	CD44	chr11:35160417-35253949	+	protein_coding	0.850685	1.80336	4.54294e-08	1.24734e-06	5.64645	4.79577	28.0466	29.2917	23.4595	23.994	26.8231	29.684	50.7729	48.2902	48.8616	49.8239	48.9993	47.8484
ENSG00000027001.9_3	MIPEP	chr13:24304328-24463558	-	protein_coding	-0.596705	0.661263	0.00285024	0.0105521	2.30377	2.90048	6.67426	5.42564	5.34312	4.99023	9.27699	7.99946	3.29173	4.07816	3.72437	3.21629	4.62612	4.93203
ENSG00000027697.13_3	IFNGR1	chr6:137518621-137540586	-	protein_coding	-1.76228	0.294783	1.09981e-07	2.53086e-06	4.5614	6.32368	65.3516	63.0944	81.9747	76.8299	97.7702	96.3441	23.7179	22.0626	22.9775	28.3735	19.5022	20.0489
ENSG00000027869.11_3	SH2D2A	chr1:156776035-156786654	-	protein_coding	-0.917967	0.529254	2.21962e-08	6.83757e-07	0.0503539	0.96832	0.983382	1.22538	0.98415	0.937777	0.681192	0.966321	0.0366215	0.0930871	0	0	0	0.0881109
ENSG00000029639.10_2	TFB1M	chr6:155578643-155635627	-	protein_coding	-0.667521	0.629587	8.22426e-05	0.000547188	2.21806	2.88558	5.60465	5.20924	6.50657	5.66604	7.8838	7.93462	3.53074	3.15569	3.54339	4.36631	3.63913	3.76327
ENSG00000030419.16_3	IKZF2	chr2:213864415-214017151	-	protein_coding	-1.27921	0.41202	5.7641e-05	0.000409885	1.31509	2.5943	5.57354	4.67248	6.18009	5.57149	3.96915	4.54792	1.99037	1.89495	1.97453	2.10623	0.515552	0.957498
ENSG00000031081.10_4	ARHGAP31	chr3:119013220-119139561	+	protein_coding	0.97018	1.95909	0.000125727	0.000771086	2.78336	1.81318	3.13281	2.88528	2.96907	2.72512	1.68613	1.95329	6.86696	7.0629	6.88973	6.59881	4.57859	4.01903
ENSG00000033867.16_3	SLC4A7	chr3:27414212-27525911	-	protein_coding	-0.638397	0.642426	0.00189656	0.00748075	2.0214	2.6598	6.38914	5.75474	6.39346	5.57761	4.29602	3.95456	3.7972	2.89599	3.4634	4.09358	2.32159	2.17228
ENSG00000034152.18_3	MAP2K3	chr17:21187984-21218552	+	protein_coding	0.723965	1.65172	0.000682936	0.00318719	4.08959	3.36563	10.5843	9.32135	9.09527	12.2056	6.75663	8.69992	15.3464	14.0511	12.194	18.7907	20.6328	16.5224
ENSG00000035862.12_3	TIMP2	chr17:76849059-76921469	-	protein_coding	1.52473	2.87732	0.0113324	0.0334432	6.60402	5.0793	49.6208	48.225	45.5555	16.3477	22.6954	30.3137	47.5268	223.586	86.6978	216.121	41.8268	94.3422
ENSG00000037280.15_3	FLT4	chr5:180028506-180076624	-	protein_coding	0.594663	1.51012	2.87067e-07	5.45588e-06	0.600028	0.00536562	0	0	0	0.0121553	0	0.0102855	0.491967	0.400713	0.535584	0.77749	0.449771	0.46646
ENSG00000037965.5_3	HOXC8	chr12:54402890-54406146	+	protein_coding	0.600183	1.51591	0.00112101	0.00482567	0.621247	0.0210645	0	0.041043	0	0	0	0.048522	0.709031	0.582862	0.937512	0.773074	0.371767	0.039057
ENSG00000038002.8_2	AGA	chr4:178351924-178363657	-	protein_coding	-0.997526	0.500858	3.90863e-07	6.91793e-06	1.34024	2.33776	4.62392	4.04955	3.95976	3.62231	3.84389	4.29192	1.19355	1.28122	1.35415	1.84448	2.02161	1.60207
ENSG00000038274.16_2	MAT2B	chr5:162930120-162946342	+	protein_coding	-0.610415	0.655008	0.000138168	0.000832794	4.07001	4.68042	23.0969	23.5673	23.1157	22.0963	28.6903	28.0343	17.4481	15.6949	18.0147	17.7636	12.5991	14.0217
ENSG00000038427.15_3	VCAN	chr5:82767284-82878122	+	protein_coding	0.72532	1.65327	6.26355e-08	1.60663e-06	0.88805	0.16273	0.0560386	0.188018	0.23608	0.100566	0.0780991	0.06929	0.837545	0.820689	0.952476	0.948065	0.665572	0.895622
ENSG00000040275.16_3	SPDL1	chr5:169010638-169031782	+	protein_coding	0.803368	1.74517	0.000937553	0.00414308	4.43031	3.62695	12.9929	11.761	13.8552	12.8832	7.92261	9.82096	23.8079	21.3445	24.3527	25.4197	16.7434	14.2474
ENSG00000041880.14_3	PARP3	chr3:51976361-51982883	+	protein_coding	-1.42621	0.372108	4.66918e-08	1.27431e-06	1.96115	3.38735	11.3417	8.9692	9.51745	9.24771	8.50312	9.41668	2.31967	2.85721	2.98047	2.80576	4.02631	2.5743
ENSG00000041982.15_3	TNC	chr9:117781857-117880536	-	protein_coding	1.69039	3.22745	1.59337e-09	8.80286e-08	1.70296	0.0125659	0.0237699	0.00815484	0	0.0112418	0	0.00951239	1.8196	1.82725	2.77	2.75223	1.9866	2.53583
ENSG00000043591.5_3	ADRB1	chr10:115803815-115806667	+	protein_coding	0.644922	1.56365	0.00518125	0.0173973	2.53046	1.88553	3.06768	3.62366	3.24223	2.32748	1.71676	2.52794	5.66769	6.37807	5.5861	5.28731	3.30233	3.2437
ENSG00000044090.8_2	CUL7	chr6:43005355-43021683	-	protein_coding	-0.73504	0.600801	3.06705e-05	0.000244468	1.40008	2.13512	3.26527	3.50121	4.24833	3.44658	3.4333	2.61712	1.57325	1.55782	1.8364	2.06373	1.79065	1.117
ENSG00000044446.11_2	PHKA2	chrX:18910418-19002716	-	protein_coding	-0.774365	0.584646	2.68759e-08	7.99016e-07	0.842122	1.61649	2.20582	2.16166	2.28537	2.04994	1.78147	1.94213	0.732611	0.709791	0.914733	0.72245	0.740514	0.951853
ENSG00000046647.13_2	GEMIN8	chrX:14026398-14048012	-	protein_coding	-0.692848	0.618631	0.000158418	0.00093624	1.56017	2.25302	3.159	3.74221	3.95721	3.21002	4.49525	4.18661	1.44638	1.86498	1.55452	2.19113	1.96463	2.88225
ENSG00000046889.18_3	PREX2	chr8:68864353-69149265	+	protein_coding	-0.728842	0.603388	1.66722e-07	3.55483e-06	0.0183227	0.747165	0.659869	0.620265	0.814725	0.931899	0.469654	0.613777	0.0309305	0.00640382	0.0183609	0	0.0213877	0
ENSG00000047230.14_2	CTPS2	chrX:16606126-16731059	-	protein_coding	-0.587605	0.665447	2.23279e-05	0.000188194	1.92741	2.51501	5.71595	4.66658	4.02944	4.03275	4.98789	5.04696	2.70388	2.52863	2.867	2.88861	2.57934	3.30536
ENSG00000047346.12_3	FAM214A	chr15:52873514-53002014	-	protein_coding	-0.699691	0.615704	0.000211157	0.0011897	1.10674	1.80643	2.56442	2.4567	2.50471	3.19791	2.01831	2.34684	1.31556	1.27702	1.27329	1.7494	0.696341	0.784596
ENSG00000047648.21_3	ARHGAP6	chrX:11155663-11683821	-	protein_coding	-0.630232	0.646072	1.31542e-06	1.8796e-05	0.27089	0.901122	0.978661	1.02459	0.891994	0.917513	0.845978	0.581232	0.162844	0.110456	0.287129	0.281158	0.188096	0.219486
ENSG00000048342.15_3	CC2D2A	chr4:15471489-15603180	+	protein_coding	0.693802	1.61754	7.59002e-06	7.66642e-05	1.23777	0.543973	0.539621	0.536002	0.324407	0.293336	0.699368	0.395363	1.24604	1.37588	1.5504	1.49866	1.0023	1.52673
ENSG00000048740.18_3	CELF2	chr10:10840360-11378674	+	protein_coding	2.01007	4.02803	1.09445e-09	6.55142e-08	2.03453	0.0244535	0.0271223	0	0	0.0383845	0.0214414	0.0161868	3.31739	3.21139	3.88819	3.58654	2.6562	2.17259
ENSG00000049239.12_2	H6PD	chr1:9294834-9331396	+	protein_coding	-0.912894	0.531118	0.00681702	0.0218471	1.47949	2.39239	5.49774	5.17322	6.19392	5.76673	1.51644	3.26263	1.72404	1.96496	2.52717	2.44667	1.17837	1.19806
ENSG00000049323.15_2	LTBP1	chr2:33172039-33624576	+	protein_coding	1.01218	2.01696	6.05702e-08	1.55951e-06	6.59593	5.58375	54.2741	50.9623	45.909	40.8202	42.2944	48.8853	94.6092	91.8916	102.718	102.867	92.242	90.8371
ENSG00000050165.17_2	DKK3	chr11:11984653-12031316	-	protein_coding	1.78518	3.44661	2.4823e-09	1.18589e-07	5.76215	3.97697	16.7892	17.0652	16.384	14.1917	11.9936	12.8241	53.1977	49.0895	53.5485	58.2621	55.8265	50.2436
ENSG00000050327.14_3	ARHGEF5	chr7:144052381-144077725	+	protein_coding	-1.16021	0.447448	1.1851e-06	1.73146e-05	0.0064394	1.16665	1.44057	1.43615	1.71022	1.55085	0.757644	0.771595	0	0	0.0271425	0	0	0
ENSG00000051382.8_2	PIK3CB	chr3:138371541-138553780	-	protein_coding	-0.633843	0.644457	0.00175408	0.00703797	2.16639	2.80023	7.05049	6.53798	6.06904	5.63664	5.08476	5.5932	4.07989	4.05485	4.10356	4.55106	2.62669	2.10149
ENSG00000051596.9_3	THOC3	chr5:175344876-175461683	-	protein_coding	0.786162	1.72448	6.5294e-05	0.000453205	4.01695	3.23079	7.22637	7.23781	7.97603	8.0134	11.0247	9.38271	13.8222	14.2393	13.6189	13.5307	18.7034	18.042
ENSG00000051620.10_2	HEBP2	chr6:138724668-138743334	+	protein_coding	-1.31415	0.402161	5.19142e-05	0.000375731	2.00797	3.32213	8.01347	7.96012	6.5478	8.01192	13.8239	11.29	2.62617	2.595	2.58853	2.21717	4.39377	4.21588
ENSG00000052126.14_3	PLEKHA5	chr12:19282686-19529334	+	protein_coding	-0.669595	0.628683	6.90226e-05	0.000474307	0.833653	1.50325	2.30391	1.80823	2.24763	2.16088	1.35383	1.31487	0.853135	0.753597	0.807554	0.963706	0.602093	0.733946
ENSG00000052795.12_3	FNIP2	chr4:159690290-159829201	+	protein_coding	0.835664	1.78468	6.05809e-07	9.92499e-06	2.44192	1.60625	2.07937	2.05432	2.39364	2.22778	1.80518	1.75597	4.40343	4.40567	5.03334	4.96117	3.57029	4.36029
ENSG00000052802.12_3	MSMO1	chr4:166248775-166264312	+	protein_coding	-0.955056	0.515821	0.00051573	0.00249828	5.32237	6.27742	73.5085	60.9601	67.4471	54.8138	114.922	105.556	42.4697	39.0868	42.1805	45.0285	35.0273	31.8867
ENSG00000053501.12_2	USE1	chr19:17326155-17330638	+	protein_coding	-0.657689	0.633893	0.0111724	0.0330359	2.06487	2.72256	4.76147	4.20674	3.69083	5.53653	9.47521	7.58184	2.6696	2.77223	2.91502	2.55263	4.58132	3.99225
ENSG00000053900.10_2	ANAPC4	chr4:25378835-25420120	+	protein_coding	-0.759089	0.590869	5.67808e-07	9.43764e-06	1.36807	2.12716	3.33147	3.09628	3.77375	3.80085	3.18873	3.08077	1.62055	1.37658	1.88804	1.83624	1.35809	1.45882
ENSG00000054219.10_3	LY75	chr2:160659866-160761260	-	protein_coding	-1.06126	0.479214	4.41799e-08	1.2204e-06	0.152584	1.21384	1.33679	1.57171	1.49724	1.53293	0.929678	1.12327	0.12553	0.166434	0.141805	0.139825	0.0513945	0.0499795
ENSG00000055163.19_3	CYFIP2	chr5:156693089-156822603	+	protein_coding	0.633488	1.55131	1.5136e-06	2.09478e-05	0.753868	0.120379	0.111729	0.100465	0.10949	0.0537764	0.0942816	0.0540233	0.618958	0.454662	0.746829	0.593533	0.961038	0.788649
ENSG00000055813.5_3	CCDC85A	chr2:56411258-56613308	+	protein_coding	0.960772	1.94635	0.0002198	0.00123229	1.20027	0.239494	0.151746	0.36857	0.140569	0.25662	0.113861	0.075943	2.52995	1.86428	0.812416	1.3323	0.836476	0.875354
ENSG00000056050.6_3	HPF1	chr4:170650616-170679104	-	protein_coding	-0.743904	0.597121	1.89963e-06	2.507e-05	4.57947	5.32338	42.1247	36.484	38.2029	32.2605	43.4261	43.0067	21.4907	22.2822	25.6294	21.9581	22.7517	23.5659
ENSG00000056558.10_2	TRAF1	chr9:123664671-123691451	-	protein_coding	-0.832195	0.561674	2.92363e-05	0.000235652	0.675981	1.50818	2.23665	2.08129	2.12572	1.48553	1.83493	1.41156	0.650133	0.626142	0.644886	1.03551	0.312261	0.410706
ENSG00000056972.18_3	TRAF3IP2	chr6:111877657-111927481	-	protein_coding	-0.831056	0.562117	1.19152e-05	0.000110759	0.972568	1.80362	3.41401	2.24671	2.7657	2.20215	2.2576	2.2152	0.985302	1.08291	1.00526	1.09714	1.12123	0.547925
ENSG00000057019.15_3	DCBLD2	chr3:98514785-98620533	-	protein_coding	-1.18866	0.438709	0.000203235	0.00115172	4.30733	5.496	49.4123	44.7029	47.089	40.5899	41.3995	42.2401	25.5075	23.1484	21.0208	24.7673	13.4497	10.4763
ENSG00000057294.14_3	PKP2	chr12:32943679-33049774	-	protein_coding	-2.42635	0.186035	8.45826e-11	1.03006e-08	1.34357	3.76992	12.3511	13.9959	15.5815	12.0296	10.7882	11.6374	1.42563	1.43974	1.84542	1.76179	1.3097	1.4869
ENSG00000058085.14_2	LAMC2	chr1:183155373-183214035	+	protein_coding	0.916043	1.88693	5.07935e-07	8.56772e-06	2.4141	1.49805	1.8905	2.03068	1.80315	1.6407	1.70561	1.89474	4.30729	3.83683	4.70519	5.63669	3.68712	4.0319
ENSG00000058091.16_3	CDK14	chr7:90095738-90839905	+	protein_coding	1.15898	2.23299	7.54896e-07	1.18953e-05	3.10512	1.94615	3.4763	3.23162	3.09476	2.66523	2.38417	2.40316	8.92111	8.19394	7.84269	8.51154	6.56654	5.99223
ENSG00000058335.15_2	RASGRF1	chr15:79252289-79383115	-	protein_coding	0.703519	1.62847	1.56482e-06	2.15257e-05	0.790841	0.0873225	0.116472	0.0899299	0.0509967	0.0429852	0.0142561	0.0627885	0.875722	0.788794	0.874141	0.902448	0.521101	0.473668
ENSG00000058804.11_2	NDC1	chr1:54231133-54304533	-	protein_coding	-0.826584	0.563863	2.21134e-09	1.08158e-07	4.24854	5.07513	33.1569	33.2717	33.9206	31.9193	31.3705	32.6895	17.7968	18.4966	18.9208	19.684	16.5132	16.8354
ENSG00000059758.7_3	CDK17	chr12:96672039-96794338	-	protein_coding	-0.693109	0.61852	0.00400732	0.013999	3.43334	4.12645	20.139	16.8262	17.6373	16.9727	13.0159	15.0452	12.0966	11.5325	12.0862	12.1491	6.82983	6.1873
ENSG00000059804.15_2	SLC2A3	chr12:8071826-8088871	-	protein_coding	0.809661	1.7528	0.000128015	0.000780906	2.59143	1.78177	2.39377	2.39259	1.39828	2.51072	3.06886	3.18993	4.04754	4.90545	4.8715	4.91363	5.83528	5.7747
ENSG00000060140.8_3	STYK1	chr12:10771538-10826917	-	protein_coding	0.629365	1.54688	4.02055e-06	4.57585e-05	1.08216	0.452792	0.492552	0.462776	0.390548	0.177789	0.422533	0.292412	0.917755	1.00105	1.23717	1.05689	1.37809	1.14478
ENSG00000063322.13_2	MED29	chr19:39881943-39891277	+	protein_coding	1.27455	2.41924	0.00582751	0.0192102	2.96442	1.68986	5.26555	1.13576	0.825533	1.78929	3.26576	2.87977	8.12334	2.77323	9.27405	9.71705	8.92406	5.01033
ENSG00000063601.16_3	MTMR1	chrX:149861444-149933576	+	protein_coding	-0.770493	0.586217	9.77484e-07	1.46035e-05	2.25777	3.02826	8.02299	7.25016	7.90692	7.15104	6.33261	6.43995	3.85399	4.21968	4.28588	3.36697	3.79401	3.26769
ENSG00000064012.21_4	CASP8	chr2:202098166-202152434	+	protein_coding	-1.59913	0.330076	1.98703e-08	6.23335e-07	0.937945	2.53708	5.97241	4.82069	5.5088	4.87275	3.91146	4.0177	0.932626	0.877946	1.07927	1.1877	0.652986	0.811756
ENSG00000065054.13_3	SLC9A3R2	chr16:2075357-2089027	+	protein_coding	0.625167	1.54239	0.000207666	0.00117294	4.64591	4.02074	13.9399	16.8283	15.8643	16.9743	16.3171	12.0807	22.5238	27.7144	19.3278	24.459	28.6105	22.7883
ENSG00000065308.4_2	TRAM2	chr6:52362200-52441713	-	protein_coding	-0.766437	0.587868	1.50257e-06	2.08375e-05	5.30648	6.07292	70.41	72.606	69.6647	68.8236	53.5305	64.807	38.758	38.6907	41.5283	41.1542	34.1967	37.5774
ENSG00000065534.18_3	MYLK	chr3:123328896-123603178	-	protein_coding	-1.89397	0.269065	4.03322e-06	4.58644e-05	0.798329	2.6923	7.01794	7.08499	7.70987	6.13153	2.69565	3.89955	0.6945	0.647589	1.00406	0.850784	0.782208	0.499038
ENSG00000065802.11_2	ASB1	chr2:239335383-239360891	+	protein_coding	-0.849395	0.555018	0.00181299	0.00722053	1.50165	2.35104	3.84757	4.76056	4.95113	2.21227	4.74553	4.75008	2.06587	2.02387	0.923332	2.51065	1.30075	2.57947
ENSG00000065833.8_2	ME1	chr6:83920108-84140790	-	protein_coding	-1.28023	0.411729	1.34881e-06	1.90536e-05	3.21983	4.50006	25.8348	23.6242	18.1754	15.8628	24.4669	23.6721	7.61468	7.00906	9.30247	9.62279	8.34415	8.26934
ENSG00000065911.11_2	MTHFD2	chr2:74425689-74444692	+	protein_coding	0.966671	1.95433	4.1056e-08	1.15041e-06	5.63784	4.67117	23.8109	23.0358	23.9729	23.5807	28.621	24.224	52.9981	45.992	43.1232	50.2651	47.8761	53.3215
ENSG00000065923.9_3	SLC9A7	chrX:46458687-46618607	-	protein_coding	-1.44083	0.368355	1.14998e-09	6.70989e-08	0.565823	2.00665	3.40373	3.00228	3.27478	3.32862	2.39667	2.80129	0.524812	0.535242	0.554433	0.400125	0.526326	0.352692
ENSG00000066056.13_2	TIE1	chr1:43766664-43788779	+	protein_coding	0.667629	1.58846	1.64396e-09	8.93763e-08	4.14383	3.4762	10.1157	10.2471	10.3906	9.56164	10.1422	10.3348	15.384	16.898	16.3041	17.6352	17.5106	16.4331
ENSG00000066926.10_2	FECH	chr18:55215515-55254004	-	protein_coding	-0.68487	0.622062	6.78381e-05	0.000468244	3.08872	3.77359	13.6043	11.1299	12.3976	10.3517	15.0676	14.1153	5.84965	7.32962	7.62072	8.27048	7.67526	8.58454
ENSG00000067048.16_3	DDX3Y	chrY:15016019-15032390	+	protein_coding	1.59388	3.0186	2.1706e-11	4.11388e-09	1.62637	0.0324908	0.013336	0.0546405	0.0407195	0	0.0291833	0	1.90509	1.85578	2.49815	2.20065	2.23553	1.88144
ENSG00000067167.7_2	TRAM1	chr8:71485677-71520622	-	protein_coding	-0.755103	0.592504	0.000175344	0.00101474	6.81394	7.56904	172.733	170.132	171.201	167.141	215.352	250.753	116.467	119.137	128.187	122.93	86.7154	101.361
ENSG00000067177.14_2	PHKA1	chrX:71798664-71934167	-	protein_coding	-2.08995	0.23489	3.4128e-10	2.61635e-08	1.02566	3.11561	8.37528	7.45256	9.25628	7.47106	6.71733	6.97962	1.07431	1.26209	1.14477	1.1931	0.753474	0.839972
ENSG00000067606.16_3	PRKCZ	chr1:1981909-2116834	+	protein_coding	0.774034	1.71004	3.56991e-05	0.000276632	0.783545	0.00951045	0	0	0.0121085	0.0278991	0	0	0.394471	0.521791	0.57321	0.674019	1.06904	1.24979
ENSG00000067715.13_3	SYT1	chr12:79257773-79845788	+	protein_coding	-0.608553	0.655854	4.86101e-06	5.32798e-05	0.0248371	0.63339	0.765306	0.717248	0.317525	0.514973	0.637332	0.406253	0.0244901	0	0.00994028	0.0252246	0	0.0452925
ENSG00000067798.14_3	NAV3	chr12:77718421-78606788	+	protein_coding	-0.913535	0.530883	0.000116168	0.000718924	0.387163	1.3007	2.04389	1.98074	1.9489	1.19846	0.921491	0.977537	0.482719	0.42076	0.370004	0.414089	0.130931	0.0841037
ENSG00000068001.13_3	HYAL2	chr3:50355221-50360337	-	protein_coding	0.982506	1.97589	0.0042816	0.0148057	4.15748	3.17497	6.56703	7.53604	6.55764	8.76319	11.9036	7.82475	11.5965	15.4509	12.0111	12.505	28.6413	28.9233
ENSG00000068079.7_2	IFI35	chr17:41158742-41166473	+	protein_coding	-1.32366	0.39952	0.000139248	0.000838929	2.27148	3.59514	9.05588	9.65436	8.61752	8.72791	17.4257	15.8661	2.84809	2.82482	3.85223	3.60719	6.13547	4.3956
ENSG00000068903.19_3	SIRT2	chr19:39369195-39390502	-	protein_coding	1.21078	2.31462	5.36361e-05	0.000385018	3.30802	2.09725	2.80564	2.70472	3.23714	3.26828	4.06947	3.74826	7.3671	7.17267	7.08251	7.50473	12.2005	14.2108
ENSG00000068971.13_3	PPP2R5B	chr11:64685025-64701945	+	protein_coding	0.946917	1.92775	2.00192e-05	0.000171381	2.59711	1.6502	1.98152	2.10176	2.26112	2.75859	2.00048	1.81141	3.77377	4.36058	4.67936	4.90664	6.29554	6.83581
ENSG00000069122.18_2	ADGRF5	chr6:46820249-46922680	-	protein_coding	-1.89811	0.268294	3.16969e-13	2.16268e-10	0.0743561	1.97247	3.18236	3.07948	3.11978	2.92519	2.5836	2.69446	0.0416878	0.0703263	0.036021	0.0429425	0.0389751	0.0884605
ENSG00000069482.6_2	GAL	chr11:68451247-68458643	+	protein_coding	2.60815	6.09722	2.77367e-09	1.30515e-07	2.73784	0.129685	0	0.297389	0.18021	0	0.119965	0	5.76925	7.64189	6.50229	4.48841	6.19635	4.08302
ENSG00000069509.5_2	FUNDC1	chrX:44382885-44402247	-	protein_coding	-0.631789	0.645376	0.000111472	0.000695222	3.94899	4.58078	23.5076	23.5563	19.5181	20.675	23.8411	27.248	16.6988	16.9832	15.0497	14.0583	12.1347	12.4314
ENSG00000069702.10_2	TGFBR3	chr1:92145900-92371892	-	protein_coding	-1.19428	0.437005	5.97244e-06	6.2983e-05	1.81081	3.00509	7.2861	7.81762	8.21849	7.06935	5.61623	6.44597	2.80507	2.8567	3.0367	3.13164	2.09699	1.46028
ENSG00000069974.15_3	RAB27A	chr15:55495164-55611311	-	protein_coding	-0.587146	0.665659	0.000170021	0.000989385	2.78174	3.36888	9.38203	8.57186	9.86342	9.39823	8.49757	10.4022	6.64667	6.32742	6.81179	6.61616	4.57671	4.68889
ENSG00000070159.13_2	PTPN3	chr9:112137746-112260593	-	protein_coding	1.70202	3.25356	2.86531e-09	1.32993e-07	1.70616	0.00414493	0	0.00786175	0	0	0.00945164	0	2.50069	2.42443	2.71986	2.69798	1.73606	1.67473
ENSG00000070214.15_2	SLC44A1	chr9:108006903-108201452	+	protein_coding	-1.54127	0.343583	2.34128e-07	4.65052e-06	2.86279	4.40406	22.9388	21.8627	22.1524	18.0874	21.7911	15.3379	7.33058	4.68592	7.19323	7.0774	5.57614	6.18697
ENSG00000070404.9_3	FSTL3	chr19:676365-683399	+	protein_coding	0.890403	1.85369	0.000343831	0.00178196	5.31506	4.42465	19.2274	20.7824	19.79	24.1018	19.2255	20.0967	28.8018	36.8692	32.1228	33.9847	48.5881	60.3812
ENSG00000070476.14_2	ZXDC	chr3:126156444-126194762	-	protein_coding	-0.58497	0.666663	0.00344395	0.0123285	1.06248	1.64745	2.51345	1.92555	2.34487	3.16818	1.55817	1.57868	1.20479	1.24202	1.3656	1.52962	0.684188	0.665862
ENSG00000071242.11_3	RPS6KA2	chr6:166822852-167319939	-	protein_coding	-1.07359	0.475135	1.27164e-05	0.000116896	3.33052	4.40411	22.0832	22.2437	24.8438	21.7094	15.2218	16.6343	9.59504	10.0901	10.351	9.79312	8.08293	6.92641
ENSG00000071575.11_2	TRIB2	chr2:12857015-12882860	+	protein_coding	0.909578	1.8785	2.88954e-06	3.51655e-05	3.55428	2.6447	5.20556	6.0513	6.41676	5.84074	3.92153	4.47446	10.5261	10.2435	11.2749	10.4148	11.512	10.5684
ENSG00000072041.16_3	SLC6A15	chr12:85253267-85307394	-	protein_coding	-0.84258	0.557645	2.95963e-07	5.55532e-06	0.0423529	0.884933	0.715175	0.672257	0.723365	0.74581	1.09613	1.19253	0.041444	0.058457	0.0494555	0.0139912	0	0.0166923
ENSG00000072062.13_2	PRKACA	chr19:14202500-14228896	-	protein_coding	-0.648992	0.637726	0.00984929	0.02979	3.33914	3.98813	16.9318	18.322	17.6313	18.4976	9.42438	11.1713	9.76466	10.8117	10.3183	11.3705	7.38585	6.19554
ENSG00000072071.16_2	ADGRL1	chr19:14258555-14316999	-	protein_coding	0.632304	1.55004	0.00099345	0.00435065	0.809347	0.177043	0.194417	0.153324	0.138719	0.186992	0.0536452	0.0644026	0.795222	0.951679	1.15637	1.18118	0.334197	0.317241
ENSG00000072110.13_4	ACTN1	chr14:69340860-69446157	-	protein_coding	0.633572	1.5514	0.0062081	0.0201896	5.78913	5.15555	39.9072	40.0623	40.7965	40.9551	23.0138	27.9888	57.5154	60.953	64.4351	63.0441	45.8954	39.1283
ENSG00000072163.19_3	LIMS2	chr2:128395956-128439360	-	protein_coding	1.07528	2.10713	0.000124237	0.000763323	2.5785	1.50322	2.32748	1.41493	1.97372	2.78381	1.79286	1.05489	4.04004	4.90846	4.0316	4.09146	6.66013	6.77212
ENSG00000072210.18_3	ALDH3A2	chr17:19551449-19580911	+	protein_coding	-0.756463	0.591946	7.71592e-05	0.000519444	2.0242	2.78067	7.07713	5.25685	5.9263	5.53916	6.69772	4.97564	2.68681	2.76131	2.64022	2.71768	4.47266	3.41049
ENSG00000072310.16_3	SREBF1	chr17:17713713-17740316	-	protein_coding	-1.13862	0.454193	2.89513e-05	0.000234323	1.70587	2.84449	6.0247	5.73833	7.36381	7.76014	4.82888	5.7918	2.57203	2.87492	2.99897	2.50184	1.73426	1.27428
ENSG00000072501.17_2	SMC1A	chrX:53401070-53449677	-	protein_coding	-0.898266	0.536531	0.0197212	0.0527367	3.23608	4.13434	22.9968	20.5729	23.7105	18.032	8.82083	11.2685	11.169	9.88445	11.0245	12.218	5.65678	3.99319
ENSG00000072506.12_3	HSD17B10	chrX:53458206-53461320	-	protein_coding	-0.609916	0.655235	0.0104985	0.0313484	6.08009	6.69	87.5387	90.3504	91.749	100.66	135.26	115.593	50.9598	57.2742	56.1312	58.0921	90.9962	100.956
ENSG00000072682.18_3	P4HA2	chr5:131527531-131631008	-	protein_coding	0.968169	1.95636	2.90915e-07	5.49076e-06	3.42027	2.4521	5.21404	4.17368	4.49478	4.15975	4.46388	4.39121	8.48358	8.97305	9.00545	9.76899	10.1709	12.2229
ENSG00000072832.14_3	CRMP1	chr4:5749811-5894785	-	protein_coding	0.637488	1.55562	0.00124662	0.00528337	0.641244	0.00375538	0	0	0	0	0	0.0157408	0.204842	0.318573	0.554326	0.403914	0.746605	1.37733
ENSG00000073008.14_3	PVR	chr19:45147098-45166850	+	protein_coding	1.33785	2.52775	7.81964e-06	7.80591e-05	5.02443	3.68657	17.4447	11.6443	10.3381	13.0618	8.50958	11.8857	29.1366	29.38	33.9112	38.7727	24.7724	35.2768
ENSG00000073060.15_2	SCARB1	chr12:125261402-125367214	-	protein_coding	-1.05734	0.480519	3.34324e-08	9.74261e-07	1.89859	2.95593	6.67627	6.80703	6.77212	7.73035	6.21573	6.43793	3.3518	2.98993	2.51167	2.66953	2.67265	2.26936
ENSG00000073111.13_3	MCM2	chr3:127317066-127341279	+	protein_coding	-0.707058	0.612568	9.87425e-06	9.51582e-05	3.93042	4.63748	22.8973	22.8142	22.6494	23.0077	26.9828	25.2949	11.6073	14.6731	15.22	13.1034	17.4768	14.0406
ENSG00000073331.17_3	ALPK1	chr4:113206665-113363776	+	protein_coding	-0.699756	0.615676	1.70111e-08	5.51386e-07	0.0162813	0.716037	0.664745	0.561011	0.744141	0.788707	0.65225	0.466702	0	0.00315055	0.0198364	0.01487	0.00484464	0.0256544
ENSG00000073737.16_3	DHRS9	chr2:169921299-169952677	+	protein_coding	-0.828792	0.563	1.23359e-08	4.1979e-07	0.673582	1.50237	1.60992	1.70274	2.19314	1.96139	1.82248	1.74651	0.648172	0.581212	0.590047	0.497827	0.564352	0.695944
ENSG00000073849.14_3	ST6GAL1	chr3:186648274-186796341	+	protein_coding	0.666046	1.58672	2.4777e-06	3.1162e-05	1.14802	0.48197	0.449906	0.344885	0.48902	0.277271	0.437077	0.392633	1.33567	0.977409	1.35667	1.51058	1.24849	0.927756
ENSG00000073910.20_4	FRY	chr13:32605437-32873259	+	protein_coding	-1.10532	0.464799	3.21396e-09	1.46192e-07	0.305756	1.41108	1.53948	1.6211	1.30416	1.66984	1.87311	2.00665	0.240373	0.219577	0.271036	0.260695	0.249937	0.177153
ENSG00000074047.21_3	GLI2	chr2:121493199-121750229	+	protein_coding	1.29929	2.46108	0.00188603	0.0074513	1.66284	0.363551	0.432705	0.458399	0.401764	0.310024	0.0935254	0.0809906	1.44058	2.01618	4.79031	5.0583	0.971782	0.979373
ENSG00000074054.17_3	CLASP1	chr2:122095352-122407163	-	protein_coding	-0.606249	0.656902	0.0256044	0.0652105	2.53341	3.13965	9.36709	9.09677	10.9747	9.29938	4.65654	5.41675	6.35403	6.059	6.35498	3.82131	3.67164	3.37826
ENSG00000074410.13_2	CA12	chr15:63613577-63674360	-	protein_coding	-1.08398	0.471727	6.55541e-06	6.77177e-05	1.55494	2.63892	5.40863	5.11698	5.0976	5.11622	6.4882	4.33392	1.74875	2.71651	1.73054	1.83866	2.57996	1.26986
ENSG00000074527.11_2	NTN4	chr12:96051583-96184930	-	protein_coding	0.992977	1.99029	2.16644e-05	0.000183281	6.22027	5.22729	41.6003	38.6263	42.2051	37.7771	29.5846	30.9464	76.833	74.7951	83.9024	91.2975	61.9683	58.005
ENSG00000074590.13_3	NUAK1	chr12:106457118-106533811	-	protein_coding	1.22956	2.34496	1.80026e-07	3.75633e-06	2.29947	1.0699	1.17392	1.61778	1.08796	1.2229	0.719597	0.884508	3.86479	3.54477	3.95786	4.32252	3.47826	4.44696
ENSG00000074660.15_4	SCARF1	chr17:1537152-1549041	-	protein_coding	-0.666457	0.630052	0.000398074	0.00201563	1.15518	1.82164	2.46016	1.9886	3.12673	3.39454	1.9485	2.52795	1.35768	0.782735	1.40352	1.71215	1.1291	1.09188
ENSG00000075303.12_2	SLC25A40	chr7:87462883-87505672	-	protein_coding	-0.834913	0.560617	0.000246748	0.0013528	2.43112	3.26603	9.23237	8.74021	8.34648	8.88245	8.34766	8.21047	5.33318	5.28596	5.29282	5.28985	3.45445	2.50563
ENSG00000075413.17_4	MARK3	chr14:103851729-103970168	+	protein_coding	0.832715	1.78103	2.42209e-07	4.76043e-06	2.82997	1.99725	3.0227	2.89419	3.37357	3.37846	2.90017	2.46117	6.38277	5.42421	6.22675	6.96848	6.04313	5.71911
ENSG00000075420.12_2	FNDC3B	chr3:171757418-172119455	+	protein_coding	0.649194	1.56829	0.00270276	0.0101157	3.86465	3.21546	10.5082	9.18129	8.92289	9.22282	5.70317	7.0612	16.5219	13.9916	15.0948	16.3113	10.6986	10.1603
ENSG00000075426.11_3	FOSL2	chr2:28615315-28640179	+	protein_coding	0.783267	1.72102	0.000114366	0.000709591	4.50348	3.72022	12.9671	13.9535	14.6948	12.9143	8.84285	10.6732	21.1627	23.3842	24.3239	25.1222	18.0394	19.0066
ENSG00000075618.17_2	FSCN1	chr7:5632454-5646286	+	protein_coding	0.735849	1.66538	9.27902e-08	2.19448e-06	6.27035	5.5345	44.2432	47.9171	46.7741	50.1209	41.7039	41.9565	69.3228	80.3385	76.3185	73.3592	78.2443	80.1707
ENSG00000075643.5_3	MOCOS	chr18:33767482-33852120	+	protein_coding	-1.80038	0.287098	2.54717e-10	2.18608e-08	0.131913	1.9323	2.62463	2.12792	2.81502	3.0182	3.3064	3.12967	0.044038	0.0735983	0.0703384	0.0757775	0.146529	0.169694
ENSG00000076248.10_2	UNG	chr12:109535379-109548797	+	protein_coding	-0.785423	0.580182	0.0199591	0.0532686	3.567	4.35243	16.2365	17.6654	15.2861	15.2791	39.2445	20.1653	7.12683	12.671	11.4453	6.75366	17.2089	13.1949
ENSG00000076944.15_3	STXBP2	chr19:7701767-7712759	+	protein_coding	-0.887387	0.540592	1.84014e-07	3.822e-06	2.10268	2.99007	6.67355	7.39958	6.22927	7.28427	7.01321	7.13185	2.89165	3.33749	2.95828	2.96003	3.98785	3.75693
ENSG00000077150.18_3	NFKB2	chr10:104153867-104162286	+	protein_coding	-0.713426	0.60987	0.00527385	0.0176649	2.45764	3.17106	8.80228	9.10462	8.70696	10.2421	6.02122	6.03587	4.62587	5.53024	5.73649	6.25948	3.07449	2.75319
ENSG00000077684.15_3	JADE1	chr4:129730778-129796379	+	protein_coding	-0.911104	0.531778	3.6274e-07	6.52167e-06	1.81204	2.72315	6.4052	5.64089	5.70214	5.44268	4.84416	5.6793	1.87906	2.642	2.96938	2.57632	2.44898	2.65122
ENSG00000078018.19_3	MAP2	chr2:210288782-210598842	+	protein_coding	-1.22942	0.42649	7.43847e-09	2.81959e-07	0.0498801	1.2793	1.87851	1.23235	1.25586	1.29118	1.23758	1.75145	0.039199	0.0485998	0.0395077	0.0730295	0	0.0123825
ENSG00000078070.12_3	MCCC1	chr3:182733006-182833863	-	protein_coding	-1.22556	0.42763	5.93306e-08	1.53048e-06	1.93642	3.16198	9.13141	7.89081	8.20766	8.01699	6.42368	8.26112	2.65899	2.50973	3.47208	2.65817	3.26458	2.50937
ENSG00000078081.7_3	LAMP3	chr3:182840001-182881627	-	protein_coding	-2.05109	0.241301	6.97386e-06	7.13383e-05	2.45851	4.5096	28.8232	24.8442	23.9309	23.4278	13.4288	19.6241	6.00326	5.60584	5.84315	5.13366	3.6249	2.07041
ENSG00000078114.18_3	NEBL	chr10:21068902-21463116	-	protein_coding	-1.46603	0.361976	9.20476e-08	2.1807e-06	2.10577	3.5718	11.9131	11.2436	11.9438	9.82878	10.3005	10.2885	4.25814	3.86966	3.41834	3.30845	3.01291	2.25105
ENSG00000078304.19_3	PPP2R5C	chr14:102228135-102394326	+	protein_coding	1.19617	2.2913	1.18574e-09	6.82729e-08	3.43051	2.23434	3.83567	3.2641	3.85589	3.50698	3.89829	3.91067	8.63409	9.28264	9.87317	9.67377	10.9266	10.4555
ENSG00000078399.17_3	HOXA9	chr7:27202054-27214799	-	protein_coding	2.03168	4.08881	6.26188e-12	1.61226e-09	2.04619	0.0145112	0	0.0257692	0	0.0355239	0	0	3.38522	3.31774	3.58969	3.13685	2.91106	2.53016
ENSG00000078401.6_2	EDN1	chr6:12290596-12297427	+	protein_coding	1.26085	2.39636	3.36038e-09	1.5184e-07	6.48806	5.22721	35.4457	41.084	36.4396	34.2372	31.9503	40.4316	93.1333	90.8368	84.8333	91.5535	80.0817	92.9446
ENSG00000078596.10_2	ITM2A	chrX:78615881-78623164	-	protein_coding	-3.12603	0.114544	5.29334e-09	2.11208e-07	0.361869	3.4879	14.7445	13.7677	7.95378	7.23844	9.59474	9.97464	0.468294	0.22543	0.0777744	0.218702	0.251263	0.523089
ENSG00000078902.15_2	TOLLIP	chr11:1295601-1330884	-	protein_coding	0.679167	1.60121	0.00369245	0.0130368	2.76309	2.08393	2.12926	4.33776	2.45233	3.79467	2.85076	4.45413	6.13894	3.93824	5.88978	6.47321	7.83159	5.10497
ENSG00000079102.16_3	RUNX1T1	chr8:92967195-93115514	-	protein_coding	0.972428	1.96214	2.6512e-07	5.13167e-06	0.985198	0.0127704	0	0.0231837	0.00971623	0	0.0139593	0.00668176	1.05646	0.939585	1.2556	1.32269	0.672278	0.722085
ENSG00000079257.7_2	LXN	chr3:158363611-158390482	-	protein_coding	-1.09908	0.466813	4.05893e-06	4.608e-05	3.60372	4.7028	25.033	21.461	21.1682	21.5837	30.149	33.2122	11.2564	9.91199	12.4104	12.5712	10.5749	10.4584
ENSG00000079308.16_3	TNS1	chr2:218664512-218867718	-	protein_coding	1.55756	2.94355	9.38235e-05	0.000603638	2.767	1.20944	1.98753	1.70588	1.72717	1.42719	0.589727	0.797685	7.85208	8.17928	6.79294	6.95422	3.6474	3.24948
ENSG00000079739.15_2	PGM1	chr1:64058947-64125916	+	protein_coding	-1.54389	0.342959	1.11605e-05	0.000104815	2.40258	3.94648	11.9549	13.0728	13.4426	12.5028	18.4264	18.4432	3.01475	3.5995	3.59082	3.67444	6.22772	6.62971
ENSG00000081041.8_2	CXCL2	chr4:74962752-74965010	-	protein_coding	-0.82212	0.56561	0.00133712	0.00559702	0.343198	1.16532	1.1253	1.04193	1.80699	2.11714	0.628116	1.05888	0.154845	0.134216	0.633082	0.667058	0.16869	0
ENSG00000081181.7_2	ARG2	chr14:68086515-68118437	+	protein_coding	-1.06728	0.477218	3.92346e-07	6.93517e-06	1.42132	2.4886	4.47431	4.45684	5.55545	3.65853	4.78735	4.91923	1.77594	1.48653	1.29026	1.6108	2.06238	1.92044
ENSG00000081189.15_3	MEF2C	chr5:88012934-88200074	-	protein_coding	-1.2702	0.414601	1.32487e-11	2.93792e-09	0.158989	1.42919	1.79772	1.91602	1.54832	1.7406	1.61146	1.56332	0.129238	0.186628	0.122912	0.102115	0.0760856	0.0855341
ENSG00000081277.12_3	PKP1	chr1:201252580-201302121	+	protein_coding	0.760474	1.69405	0.0361982	0.0860734	1.54536	0.78489	1.29547	1.23027	0.510467	0.983367	0.264473	0.348961	3.06708	2.99633	2.67013	3.01248	0.723693	0.498667
ENSG00000081803.15_4	CADPS2	chr7:121958479-122526813	-	protein_coding	-3.30374	0.101268	4.62382e-11	6.64176e-09	0.475733	3.77948	13.8513	13.156	14.308	12.7517	11.2937	11.324	0.602326	0.58617	0.373431	0.493819	0.355641	0.0230787
ENSG00000082014.16_2	SMARCD3	chr7:150935850-150974982	-	protein_coding	0.92758	1.90208	8.22027e-06	8.12854e-05	1.19351	0.265934	0.142907	0.233159	0.215629	0.30577	0.171057	0.153586	0.956243	1.11308	0.918807	1.22003	1.69273	2.01842
ENSG00000082146.12_2	STRADB	chr2:202252581-202345569	+	protein_coding	-0.798928	0.574776	0.000434117	0.00217074	2.85803	3.65695	10.4261	8.37289	11.5524	10.7098	15.285	14.7138	5.61379	4.6597	5.8383	7.0012	7.1218	7.73192
ENSG00000082482.13_3	KCNK2	chr1:215179118-215410436	+	protein_coding	-1.09182	0.469169	1.59434e-08	5.21734e-07	1.57893	2.67075	5.412	5.25397	5.53345	6.0563	4.95533	5.05445	1.99678	1.76933	2.06306	1.80781	2.56738	1.79205
ENSG00000083123.14_2	BCKDHB	chr6:80816364-81055987	+	protein_coding	-0.646027	0.639038	1.22969e-05	0.000113457	2.49511	3.14114	7.74796	7.36645	7.67188	8.45362	7.90649	7.8226	4.61297	5.15028	4.86845	4.79917	5.26482	3.3625
ENSG00000083857.13_3	FAT1	chr4:187508937-187647876	-	protein_coding	3.9195	15.1316	1.56787e-08	5.15544e-07	4.00828	0.088781	0.0578191	0.108936	0.12775	0.0392726	0.0270895	0.0244389	22.8468	18.8104	17.5963	19.516	10.6427	7.27509
ENSG00000084070.11_3	SMAP2	chr1:40810522-40888998	+	protein_coding	-1.45761	0.364096	4.25809e-10	3.10727e-08	2.86776	4.32537	19.3388	18.7944	17.3781	17.2552	21.262	20.5913	5.68043	6.60889	6.17867	6.01822	6.30405	7.08593
ENSG00000084764.10_3	MAPRE3	chr2:27193480-27250064	+	protein_coding	0.612793	1.52922	2.11445e-06	2.73237e-05	1.25186	0.639063	0.568586	0.497255	0.563198	0.726863	0.464294	0.53659	1.44806	1.20177	1.62433	1.58543	1.39708	1.08088
ENSG00000085117.11_3	CD82	chr11:44585977-44641913	+	protein_coding	-1.18916	0.438559	2.60243e-05	0.00021419	2.37957	3.56872	7.96675	9.80329	9.32085	13.1261	14.9942	11.3557	4.44793	2.87967	5.63716	3.86763	4.42671	4.35879
ENSG00000085276.17_4	MECOM	chr3:168801287-169381406	-	protein_coding	-0.845166	0.556647	8.70192e-07	1.33124e-05	1.69851	2.54368	5.35492	5.00913	5.36433	4.91746	3.71853	4.79057	2.34325	2.34083	2.16854	2.55357	1.83133	2.28306
ENSG00000085563.14_2	ABCB1	chr7:87132949-87342639	-	protein_coding	-2.575	0.167822	3.88365e-11	6.0527e-09	1.3561	3.9311	15.6533	14.7723	14.6328	13.3092	13.0827	14.2246	1.7406	1.53422	1.89397	1.72751	1.57248	0.995565
ENSG00000085662.13_2	AKR1B1	chr7:134127102-134144036	-	protein_coding	-2.24968	0.210271	1.05953e-08	3.69778e-07	4.58622	6.83589	107.608	119.34	94.7899	102.101	140.508	120.68	20.3018	23.0106	18.3074	21.1666	28.51	28.7387
ENSG00000085719.12_3	CPNE3	chr8:87526656-87573726	+	protein_coding	-1.05811	0.48026	4.23065e-08	1.18302e-06	3.99056	5.04868	33.1717	30.8404	30.7212	26.9623	35.1853	36.6462	15.2649	14.6393	15.1318	15.8835	15.3393	13.2504
ENSG00000085871.8_2	MGST2	chr4:140586922-140661899	+	protein_coding	-0.866375	0.548523	6.97273e-06	7.13383e-05	2.3579	3.22428	8.80871	8.14419	6.89292	7.10846	9.6659	9.88167	3.89087	3.37169	4.29837	3.87447	4.56332	4.90685
ENSG00000086712.12_3	TXLNG	chrX:16804550-16862642	+	protein_coding	-0.854052	0.553229	3.85565e-05	0.000294592	2.57095	3.425	11.4866	10.8852	11.8828	10.214	7.79924	7.13789	5.34983	4.43764	5.35969	5.43666	4.68225	4.48041
ENSG00000086730.16_3	LAT2	chr7:73613982-73644164	+	protein_coding	-0.674136	0.626708	3.39158e-07	6.17018e-06	0.0494023	0.723538	0.557546	0.614225	0.659094	0.52617	0.98905	0.600721	0.0205151	0.0663058	0.0350967	0.0269107	0.0285609	0.0322491
ENSG00000086991.12_2	NOX4	chr11:89057524-89231355	-	protein_coding	1.18369	2.27157	5.19294e-05	0.000375731	1.57909	0.395403	0.299708	0.32276	0.245726	0.334605	0.386195	0.306901	1.65621	1.47049	1.37401	1.44917	2.84759	3.84607
ENSG00000087074.7_3	PPP1R15A	chr19:49375649-49379314	+	protein_coding	1.28363	2.4345	2.77676e-06	3.40446e-05	4.94022	3.6566	13.1172	12.6821	11.9276	14.6209	9.3416	8.9715	28.0124	28.1322	35.9921	35.358	27.961	24.4364
ENSG00000087076.8_3	HSD17B14	chr19:49316274-49339935	-	protein_coding	-1.80824	0.28554	3.5258e-09	1.56891e-07	0.0833899	1.89163	2.20132	2.72339	2.45245	2.35717	3.52618	3.17368	0	0	0.186994	0.191704	0	0
ENSG00000087077.13_3	TRIP6	chr7:100464760-100471076	+	protein_coding	0.709111	1.6348	0.00043152	0.00216251	5.40412	4.69501	22.2633	23.1589	21.7528	25.3999	32.0402	26.0776	35.4913	40.4498	34.9596	36.036	54.1865	50.8606
ENSG00000087245.12_3	MMP2	chr16:55423612-55540603	+	protein_coding	3.18241	9.07821	1.56077e-07	3.39685e-06	4.75671	1.5743	2.51284	3.08262	2.5471	2.30693	0.887855	1.19588	33.4001	27.8801	27.5595	36.7406	18.0005	18.1862
ENSG00000087253.12_3	LPCAT2	chr16:55542910-55620582	+	protein_coding	2.00061	4.00169	5.49903e-09	2.18775e-07	3.40567	1.40506	1.70202	1.67649	1.50876	1.47184	1.75403	1.79312	7.79817	8.97222	7.97374	9.49554	12.8811	11.3499
ENSG00000087301.8_3	TXNDC16	chr14:52897308-53019240	-	protein_coding	-0.623714	0.648998	0.00240574	0.0091726	1.82578	2.4495	6.39712	4.47242	5.72396	3.63789	3.39079	3.79187	2.78511	2.35272	3.06076	3.24001	2.21311	1.82696
ENSG00000087303.17_3	NID2	chr14:52471521-52535946	-	protein_coding	0.655529	1.57519	0.0239376	0.061714	2.65879	2.00326	4.71608	4.56824	3.12651	2.35866	1.87648	2.27204	6.17975	6.60778	6.937	6.77841	3.8945	2.84261
ENSG00000087494.15_3	PTHLH	chr12:28111017-28125638	-	protein_coding	1.82431	3.54137	2.49023e-08	7.50146e-07	1.91849	0.094183	0.133916	0.115878	0	0.0636198	0	0.0993286	2.3991	3.39375	1.79794	2.51964	3.50223	3.40732
ENSG00000087510.6_2	TFAP2C	chr20:55204358-55214339	+	protein_coding	0.611603	1.52796	3.80853e-07	6.79362e-06	0.69144	0.0798375	0.0754583	0.0261497	0.108938	0.0716157	0.0315432	0.0302985	0.66457	0.662679	0.634071	0.751167	0.373805	0.630165
ENSG00000087842.10_2	PIR	chrX:15402921-15511687	-	protein_coding	-1.48317	0.357702	2.90017e-07	5.48313e-06	1.68358	3.16675	9.91275	7.32945	6.28206	6.29995	9.90751	8.95106	2.23067	2.13037	1.93599	2.04356	2.18949	2.81153
ENSG00000088035.15_2	ALG6	chr1:63833261-63904233	+	protein_coding	-0.984083	0.505547	6.57013e-06	6.78185e-05	1.5912	2.57528	5.77562	4.37905	5.21159	5.12724	4.65298	4.71507	2.19466	2.42107	2.33173	2.54082	1.46895	1.35027
ENSG00000088808.16_2	PPP1R13B	chr14:104200089-104313927	-	protein_coding	0.830862	1.77875	0.000102212	0.000648448	1.56669	0.735832	0.812199	0.796402	0.927814	0.847322	0.314441	0.399869	2.18808	1.80865	2.35768	2.6396	1.47525	1.49456
ENSG00000088899.14_2	LZTS3	chr20:3143263-3154238	-	protein_coding	0.666963	1.58773	7.79832e-07	1.22037e-05	1.5852	0.918234	0.920453	1.0131	1.03482	0.75297	0.808478	0.826475	1.99631	1.84421	2.2392	1.97357	1.65113	2.35315
ENSG00000089048.14_2	ESF1	chr20:13694969-13765532	-	protein_coding	0.7146	1.64103	0.0234692	0.0607591	5.11306	4.39846	26.6286	24.3113	23.3064	25.2322	12.1149	14.0459	41.4867	35.1952	45.0141	44.2104	21.9801	22.3735
ENSG00000089127.12_3	OAS1	chr12:113344582-113371027	+	protein_coding	-0.803369	0.573009	0.00249452	0.00945824	1.11142	1.91479	3.0043	2.39929	1.7759	1.61989	5.23116	3.65886	0.997901	0.893988	1.34692	1.34772	1.30593	1.11582
ENSG00000089154.10_2	GCN1	chr12:120565007-120632513	-	protein_coding	-0.717892	0.607985	6.94328e-05	0.00047636	2.4362	3.15409	8.47864	7.97865	10.3243	8.11504	5.91571	7.19009	4.37757	4.75741	4.47864	5.18941	3.81381	3.97264
ENSG00000089177.18_3	KIF16B	chr20:16252749-16554079	-	protein_coding	-0.944526	0.5196	2.32146e-05	0.000193991	0.142704	1.08723	1.48031	1.30482	1.66102	1.24702	0.604163	0.6776	0.0840895	0.165923	0.139541	0.149288	0.0935894	0
ENSG00000089248.6_3	ERP29	chr12:112451120-112461255	+	protein_coding	-0.650425	0.637093	8.79028e-05	0.00057627	4.55305	5.20347	31.2569	36.4705	31.3896	30.6718	45.7051	42.2166	22.3641	22.2132	21.8454	20.7645	23.5959	24.2305
ENSG00000089486.16_3	CDIP1	chr16:4560676-4588829	-	protein_coding	2.15092	4.44111	1.22664e-10	1.3095e-08	2.7517	0.600777	0.473636	0.660343	0.578773	0.60953	0.405084	0.392526	5.61851	7.15164	5.71878	5.29613	6.05292	4.79863
ENSG00000089820.15_3	ARHGAP4	chrX:153172821-153200452	-	protein_coding	-0.715657	0.608928	7.95191e-07	1.23449e-05	0.0190702	0.734727	0.566	0.52905	0.830049	0.911169	0.757647	0.442589	0	0.0270874	0	0	0.0230305	0.0302634
ENSG00000089876.11_4	DHX32	chr10:127524906-127585005	-	protein_coding	-0.733369	0.601497	7.91148e-05	0.000531005	2.55194	3.28531	8.12994	8.44219	8.77014	9.05444	8.47903	9.69802	4.43513	3.62119	4.25839	4.9356	6.85279	5.60639
ENSG00000089902.9_2	RCOR1	chr14:103058998-103196913	+	protein_coding	0.930837	1.90638	0.000225611	0.00125661	3.43735	2.50651	5.74147	4.93397	5.75554	4.84409	3.37844	3.86873	10.7873	10.7332	11.3513	12.7844	7.92337	6.69141
ENSG00000090013.9_2	BLVRB	chr19:40953696-40971747	-	protein_coding	1.21743	2.32532	0.0045255	0.0155358	4.46879	3.25136	6.70992	5.72133	5.74256	10.4297	14.718	10.8789	13.594	16.3795	17.2327	16.1775	32.1753	43.7297
ENSG00000090061.17_3	CCNK	chr14:99947506-100001381	+	protein_coding	1.01773	2.02474	0.0057748	0.019076	3.91397	2.89623	7.86256	8.27238	8.07554	7.96602	3.25319	4.98658	17.0613	18.403	19.2079	18.091	8.89732	7.76679
ENSG00000090097.21_3	PCBP4	chr3:51991470-52008032	-	protein_coding	0.703293	1.62822	0.00656327	0.0211432	3.12932	2.42603	2.73082	3.66887	3.87071	4.28451	6.7136	5.96578	7.00822	6.09627	6.80043	7.79038	12.4343	7.57443
ENSG00000090238.11_3	YPEL3	chr16:30103635-30108236	-	protein_coding	-0.91198	0.531455	8.64786e-06	8.5082e-05	1.54068	2.45266	3.48852	5.08216	5.15851	5.63302	4.18253	3.65649	2.0274	2.27689	1.73685	1.87457	2.08749	1.51643
ENSG00000090339.8_2	ICAM1	chr19:10381511-10397291	+	protein_coding	-2.53001	0.173137	4.11131e-06	4.64902e-05	1.88628	4.41629	25.5271	22.0503	23.7339	22.7282	15.0971	15.4038	3.53742	3.27526	3.59715	4.96574	1.38726	1.00971
ENSG00000090376.10_3	IRAK3	chr12:66582659-66648402	+	protein_coding	-1.78175	0.290831	1.75177e-09	9.26537e-08	0.332325	2.11407	3.30329	3.10439	4.21593	3.76331	2.62134	3.14221	0.261686	0.380143	0.21542	0.374586	0.143425	0.19745
ENSG00000090661.11_2	CERS4	chr19:8271620-8327305	+	protein_coding	1.06236	2.08835	0.00126701	0.00535613	1.1125	0.0501415	0	0.0740722	0.0459426	0.0261537	0.0449918	0.0225815	0.659951	0.397751	0.901514	0.806976	2.37343	2.79956
ENSG00000090776.5_2	EFNB1	chrX:68048840-68061990	+	protein_coding	0.696473	1.62054	5.02361e-06	5.46232e-05	3.2763	2.57982	6.01133	5.06262	4.86136	5.18436	4.21494	4.68355	7.6053	8.07741	8.96402	8.55401	8.89712	10.2389
ENSG00000091129.19_3	NRCAM	chr7:107788068-108097161	-	protein_coding	-1.09619	0.467751	0.000137567	0.000830267	2.29457	3.39076	11.8911	10.9769	9.95587	7.95378	7.62773	9.18928	4.76875	4.54153	4.80472	4.79154	3.35571	1.97899
ENSG00000091490.10_3	SEL1L3	chr4:25749049-25865382	-	protein_coding	2.27669	4.84564	2.01086e-10	1.82935e-08	2.83995	0.563262	0.511696	0.471652	0.511019	0.370531	0.584406	0.425797	4.99797	5.59761	6.31521	5.91639	6.3227	8.18945
ENSG00000091592.15_3	NLRP1	chr17:5402747-5522744	-	protein_coding	0.616767	1.53343	4.46728e-05	0.00033221	2.41775	1.80099	2.84157	2.62704	3.00043	2.73952	1.94844	1.91291	4.46308	4.52873	4.52443	4.58763	4.32144	3.69126
ENSG00000091656.15_4	ZFHX4	chr8:77593454-77779521	+	protein_coding	1.14229	2.20732	0.00238683	0.00911577	1.86667	0.724372	0.824142	0.698454	0.872775	0.658612	0.275837	0.656561	4.25335	3.43564	3.96964	3.977	0.968312	1.07374
ENSG00000091844.7_2	RGS17	chr6:153325594-153452384	-	protein_coding	-0.848816	0.55524	1.93721e-07	3.95065e-06	0.537217	1.38603	2.15891	1.72344	1.34132	1.48163	1.50233	1.54816	0.378678	0.522092	0.441608	0.545781	0.384711	0.44229
ENSG00000091879.13_2	ANGPT2	chr8:6357172-6420930	-	protein_coding	-0.921929	0.527803	2.22256e-06	2.85316e-05	0.294595	1.21652	1.87725	1.59109	1.29833	0.858574	1.26894	1.17965	0.307506	0.252398	0.280892	0.254806	0.167139	0.10839
ENSG00000091972.18_3	CD200	chr3:112051194-112081659	+	protein_coding	-1.28182	0.411277	7.05976e-08	1.76442e-06	0.507552	1.78937	1.93747	2.47914	2.02257	3.23464	2.68226	2.54136	0.535215	0.397692	0.28503	0.436307	0.325649	0.57239
ENSG00000091986.15_3	CCDC80	chr3:112315641-112368377	-	protein_coding	0.724417	1.65223	0.00226228	0.00871326	4.03519	3.31078	10.264	10.9965	11.0119	10.749	5.44952	6.76193	16.1503	15.4993	17.6633	17.8944	12.4032	13.5216
ENSG00000092010.14_2	PSME1	chr14:24605367-24608176	+	protein_coding	-0.654778	0.635173	0.000963697	0.00423667	5.56588	6.22066	62.6583	63.5256	65.2409	69.2726	93.9225	93.7898	43.3168	40.4686	44.9197	40.3603	53.8368	58.0257
ENSG00000092140.14_3	G2E3	chr14:31028329-31089269	+	protein_coding	0.609605	1.52584	0.00918874	0.0281079	2.3671	1.7575	2.62609	2.02559	3.06489	3.6708	2.12572	1.29466	4.00931	4.93024	3.82529	6.18488	3.34119	3.21708
ENSG00000092621.12_3	PHGDH	chr1:120191034-120286849	+	protein_coding	1.13214	2.19183	6.49419e-06	6.71362e-05	1.5436	0.411465	0.184875	0.238195	0.350958	0.2973	0.443156	0.491843	1.7029	1.80124	1.24185	1.61391	2.51833	2.93201
ENSG00000092871.16_3	RFFL	chr17:33333009-33416338	-	protein_coding	-0.739229	0.599059	9.03611e-06	8.83919e-05	1.71346	2.45269	4.71244	4.39592	5.04495	4.85484	3.72125	4.22568	2.31441	2.51244	2.57373	2.6956	2.03559	1.66533
ENSG00000093144.18_3	ECHDC1	chr6:127609855-127664754	-	protein_coding	-0.81042	0.570216	0.00115511	0.00495367	2.62975	3.44017	9.06913	9.84565	9.72574	9.72354	9.81363	11.0386	6.73038	5.91143	6.56908	6.81664	3.11925	3.31663
ENSG00000095203.14_2	EPB41L4B	chr9:111934255-112083244	-	protein_coding	0.819637	1.76496	4.12783e-06	4.65908e-05	1.1731	0.35346	0.298867	0.320138	0.275396	0.188308	0.269838	0.317972	0.886229	1.10006	1.29709	1.20258	1.21721	1.95856
ENSG00000095303.14_4	PTGS1	chr9:125132809-125157982	+	protein_coding	-1.50342	0.352716	4.02425e-09	1.70416e-07	0.262584	1.766	2.76703	3.06034	1.94008	2.01627	2.51192	2.24926	0.266392	0.196389	0.109859	0.16079	0.249187	0.222317
ENSG00000095370.19_2	SH2D3C	chr9:130500596-130541020	-	protein_coding	0.703128	1.62803	0.0001144	0.000709591	1.36627	0.66314	0.675437	0.754879	0.681861	0.659929	0.27445	0.507204	1.54322	1.82596	1.89244	1.99869	1.3846	0.974984
ENSG00000095637.21_3	SORBS1	chr10:97071528-97321171	-	protein_coding	-0.683453	0.622673	1.67039e-05	0.000147063	0.165987	0.84944	0.976503	0.948518	1.00421	0.962875	0.4326	0.576445	0.106099	0.0614594	0.157968	0.0697988	0.172134	0.169847
ENSG00000095752.6_3	IL11	chr19:55875757-55881831	-	protein_coding	1.3835	2.609	3.60822e-12	1.07039e-09	2.17617	0.792671	0.688666	0.683209	0.675599	0.69119	0.850022	0.813367	3.47743	3.31483	3.54835	3.63116	3.32937	3.8372
ENSG00000096060.14_2	FKBP5	chr6:35541362-35696360	-	protein_coding	-1.34764	0.392934	1.11104e-05	0.000104561	4.72059	6.06823	63.791	71.0438	70.3106	63.398	50.7978	81.1984	32.252	31.8069	25.7274	27.2757	22.0137	16.7049
ENSG00000096063.15_3	SRPK1	chr6:35800743-35889119	-	protein_coding	-0.855299	0.552751	9.76023e-09	3.47749e-07	3.81615	4.67145	25.2077	23.1556	26.178	22.5646	25.6052	24.3853	14.0039	13.3001	13.087	14.1065	12.1556	12.002
ENSG00000096696.13_3	DSP	chr6:7541808-7586950	+	protein_coding	1.3416	2.53433	0.000263798	0.00143991	1.42706	0.085458	0.037503	0.0425344	0.147842	0.0901187	0	0.0541852	2.92458	2.40719	2.23132	2.43054	0.730993	0.473338
ENSG00000099194.5_2	SCD	chr10:102106881-102124591	+	protein_coding	-1.79104	0.288964	9.15726e-06	8.93209e-05	5.39231	7.18335	133.983	114.293	151.077	118.72	179.522	183.321	48.0699	45.4788	50.2583	54.6233	33.3113	23.601
ENSG00000099219.13_2	ERMP1	chr9:5765076-5833117	-	protein_coding	-1.34265	0.394297	7.41874e-08	1.83732e-06	0.754486	2.09713	3.57364	3.1799	3.80748	2.58887	3.58312	3.0582	0.886846	0.837216	0.773115	0.533393	0.369522	0.786
ENSG00000099250.17_3	NRP1	chr10:33466420-33625190	-	protein_coding	-0.964171	0.512573	2.67881e-06	3.32003e-05	3.46353	4.4277	23.5952	22.9546	21.2167	19.5084	16.5533	20.0866	12.6355	9.36567	9.61244	10.8764	9.4434	8.68591
ENSG00000099260.10_2	PALMD	chr1:100111499-100160097	+	protein_coding	0.655399	1.57505	6.06495e-07	9.92499e-06	3.76037	3.10497	8.09468	7.58308	7.18503	6.90461	8.07307	7.85219	13.3281	11.2368	11.4532	12.3908	14.1168	13.0121
ENSG00000099282.9_3	TSPAN15	chr10:71211229-71267425	+	protein_coding	1.16572	2.24345	3.32886e-05	0.000261067	3.50956	2.34384	4.30827	3.98184	4.15112	3.2681	5.41734	3.58731	9.61181	10.6671	8.71027	7.13458	14.0957	13.7816
ENSG00000099284.13_2	H2AFY2	chr10:71812552-71872036	+	protein_coding	2.85213	7.22064	7.76996e-10	5.02506e-08	3.61812	0.765992	0.617505	0.513405	0.96707	0.522109	1.01089	0.640831	8.32396	9.74748	12.7173	11.0803	14.0127	12.7487
ENSG00000099337.4_2	KCNK6	chr19:38810484-38822716	+	protein_coding	1.20946	2.31251	4.98076e-06	5.42871e-05	2.56858	1.35912	1.81271	1.99346	1.80131	1.58599	1.20169	1.12211	4.59249	4.93867	5.86273	6.52135	3.39347	4.78653
ENSG00000099822.2_2	HCN2	chr19:589893-617159	+	protein_coding	0.806919	1.74947	8.08328e-06	8.02798e-05	1.297	0.490077	0.539172	0.303661	0.565337	0.456543	0.351647	0.241426	1.17947	1.51592	2.16638	1.43956	1.31003	1.24941
ENSG00000099860.8_3	GADD45B	chr19:2476120-2478257	+	protein_coding	0.722061	1.64954	0.00145049	0.00599213	4.83104	4.10898	17.2554	17.6404	18.5516	23.7188	10.474	12.9891	24.0529	29.4183	28.3873	27.4945	25.7947	30.1006
ENSG00000099937.10_2	SERPIND1	chr22:21128167-21142008	+	protein_coding	-0.875697	0.544991	2.46757e-06	3.10632e-05	0.14394	1.01964	1.33448	1.32287	0.766536	0.867699	0.739948	1.23084	0.0730441	0.0361226	0.263509	0.09603	0.117453	0.057605
ENSG00000099998.17_3	GGT5	chr22:24615622-24641110	-	protein_coding	-1.53876	0.344182	8.96071e-07	1.36319e-05	2.48819	4.02695	16.2303	17.6159	17.2259	18.7802	11.7162	11.7626	3.80463	4.84675	5.13927	4.70825	5.83246	3.63824
ENSG00000100003.17_3	SEC14L2	chr22:30792846-30821305	+	protein_coding	-0.996966	0.501053	0.00101768	0.00444391	3.20646	4.20343	15.1639	25.4792	14.9737	16.6132	16.3206	17.7453	6.31081	7.11065	6.63598	6.17624	11.6388	14.0648
ENSG00000100031.18_4	GGT1	chr22:24979718-25024972	+	protein_coding	0.656113	1.57583	3.3955e-05	0.000265966	0.723487	0.0673739	0.0344	0	0.0497791	0.0527696	0.0213771	0.133401	0.537881	0.508575	0.563998	0.45673	0.751676	1.18871
ENSG00000100036.12_3	SLC35E4	chr22:31031639-31065003	+	protein_coding	0.646835	1.56573	0.00186354	0.0073838	2.28347	1.63664	2.34331	2.34314	2.04192	1.8355	2.16922	1.95805	3.10917	3.02125	3.20181	3.27019	5.18227	6.26474
ENSG00000100060.17_2	MFNG	chr22:37865101-37882439	-	protein_coding	-1.71268	0.305093	1.6921e-06	2.27717e-05	2.37414	4.08682	12.602	15.15	13.6333	20.655	18.9295	16.3525	3.12225	4.48011	2.92432	3.87139	5.64702	5.76331
ENSG00000100077.14_3	GRK3	chr22:25960816-26125261	+	protein_coding	1.68903	3.22439	3.79277e-09	1.64829e-07	2.03558	0.346552	0.290599	0.24678	0.29049	0.298203	0.253327	0.250811	3.08927	3.4128	3.23323	4.03091	2.86667	2.19598
ENSG00000100100.12_3	PIK3IP1	chr22:31677579-31688520	-	protein_coding	-1.34844	0.392717	1.61186e-06	2.19516e-05	0.641859	1.9903	2.76747	2.11957	2.73276	3.05292	3.5546	3.85782	0.465591	0.366757	0.466967	0.643532	0.399491	1.13521
ENSG00000100139.13_3	MICALL1	chr22:38301664-38338829	+	protein_coding	0.865392	1.82184	0.0258395	0.0657111	3.62661	2.76122	6.61976	9.00149	9.27756	7.17007	2.76205	3.03378	14.3225	13.6053	12.3747	17.1538	6.87807	7.29474
ENSG00000100196.10_2	KDELR3	chr22:38864067-38879452	+	protein_coding	1.06762	2.09597	4.14672e-05	0.00031315	6.02071	4.9531	31.8014	26.8367	27.4768	24.453	38.7096	32.6161	58.8963	56.3319	51.3214	57.7866	85.7019	80.7919
ENSG00000100234.11_2	TIMP3	chr22:33197687-33259030	+	protein_coding	-1.55341	0.340705	4.5014e-06	5.00428e-05	1.77352	3.32693	8.61609	9.65457	9.41765	9.90935	6.96045	10.0152	2.16927	1.61414	2.438	1.93024	2.36254	4.69032
ENSG00000100285.9_2	NEFH	chr22:29876219-29887379	+	protein_coding	1.55037	2.92893	0.00187019	0.00740803	1.57916	0.0287876	0	0.020633	0	0.057078	0.044766	0	3.26271	3.4452	3.40744	3.73501	0.55737	0.155501
ENSG00000100297.15_3	MCM5	chr22:35796056-35821423	+	protein_coding	-0.783523	0.580946	8.48881e-06	8.36378e-05	3.70355	4.48708	20.1678	21.4553	20.6936	22.5088	22.8777	20.9746	9.87455	11.443	11.4936	10.7726	15.1981	14.168
ENSG00000100311.16_2	PDGFB	chr22:39619364-39640756	-	protein_coding	0.751174	1.68316	0.0118452	0.0346122	2.63969	1.88852	3.0964	3.0792	3.44467	4.56426	1.25655	1.76272	6.23534	6.10055	5.99125	6.54113	2.95208	4.47261
ENSG00000100342.20_2	APOL1	chr22:36649056-36663576	+	protein_coding	-1.38698	0.382363	4.65623e-06	5.14902e-05	0.114976	1.50196	2.25348	2.33745	1.9115	1.2052	0.943806	2.80918	0.105631	0.13281	0.113324	0.11583	0.0367656	0
ENSG00000100422.13_2	CERK	chr22:47080308-47134158	-	protein_coding	0.595095	1.51057	0.000509849	0.00247625	4.08779	3.4927	11.0047	10.5191	9.79786	9.76757	10.4948	10.0083	13.7623	13.9507	13.8352	14.5037	19.8831	21.801
ENSG00000100504.16_2	PYGL	chr14:51324609-51411454	-	protein_coding	-1.75516	0.296239	7.49738e-09	2.83405e-07	3.14319	4.89835	34.3867	33.4028	26.1829	23.1074	27.5302	29.9116	6.99205	7.34889	7.92801	7.79582	7.81674	9.29283
ENSG00000100522.8_2	GNPNAT1	chr14:53241912-53258386	-	protein_coding	-1.10722	0.464188	9.71152e-11	1.13268e-08	5.47091	6.57813	92.4205	102.96	94.1387	90.8296	89.3655	98.2291	45.8794	43.4585	42.0297	45.4283	40.8095	42.7215
ENSG00000100554.11_3	ATP6V1D	chr14:67761088-67826982	-	protein_coding	0.598555	1.5142	0.00342076	0.0122583	4.50631	3.90776	14.1045	17.0648	14.1292	10.1199	14.2501	15.3299	20.5064	20.6881	18.0145	17.9438	32.3615	23.5823
ENSG00000100596.6_3	SPTLC2	chr14:77972340-78083116	-	protein_coding	1.05081	2.07169	1.3562e-09	7.74339e-08	4.63748	3.58667	10.5137	10.524	11.8265	10.0792	10.8092	12.5059	23.9419	22.4935	23.6421	23.4803	24.4377	25.4411
ENSG00000100605.16_3	ITPK1	chr14:93403259-93582665	-	protein_coding	0.611671	1.52803	2.0944e-05	0.00017818	3.64646	3.03479	7.80785	7.79145	7.88193	8.0073	5.90116	6.08632	10.4485	12.2574	11.2892	11.1371	11.4836	12.6451
ENSG00000100625.8_3	SIX4	chr14:61176246-61191066	-	protein_coding	-1.29989	0.406158	1.28378e-06	1.84017e-05	1.2394	2.53928	5.41373	5.02711	5.51099	5.30044	3.64861	4.23404	1.72765	1.41611	1.49602	1.83362	0.975399	0.881133
ENSG00000100711.13_2	ZFYVE21	chr14:104182067-104200005	+	protein_coding	0.617396	1.5341	5.80442e-07	9.60087e-06	2.47006	1.85266	2.58956	2.32633	2.77474	2.91149	2.5093	2.58743	3.8581	5.13097	4.59376	4.61225	4.48744	4.6385
ENSG00000100865.14_2	CINP	chr14:102807439-102829253	-	protein_coding	0.838674	1.78841	0.000637577	0.00299806	2.88456	2.04589	2.47902	2.28051	2.20503	3.60844	3.5882	5.40936	6.24182	6.52681	5.76952	5.32353	7.27306	7.40224
ENSG00000100867.14_3	DHRS2	chr14:24099324-24114848	+	protein_coding	0.96342	1.94993	1.81649e-06	2.40893e-05	1.13454	0.171124	0.0824385	0.0828491	0.19995	0.14298	0.195594	0.0600459	0.798211	0.818129	1.29101	1.32206	1.59042	1.48574
ENSG00000100911.15_3	PSME2	chr14:24612571-24616779	-	protein_coding	-0.793441	0.576966	0.00115021	0.00493609	4.20228	4.99572	25.3216	26.6098	24.7664	26.8675	46.8528	41.2411	15.9129	15.8387	15.9144	16.1412	20.001	21.4392
ENSG00000100979.14_3	PLTP	chr20:44527260-44540794	-	protein_coding	-1.29106	0.408651	4.45358e-10	3.1965e-08	0.731026	2.02209	2.64126	2.99152	2.96967	2.97685	3.48454	3.36365	0.614994	0.657462	0.700149	0.557089	0.827421	0.614772
ENSG00000101017.13_3	CD40	chr20:44746911-44758502	+	protein_coding	-0.738366	0.599418	6.13392e-06	6.43247e-05	0.0884743	0.82684	0.513968	0.743507	0.693334	1.25213	0.712178	0.807157	0.0887832	0.0939418	0	0.0321953	0	0.175176
ENSG00000101057.15_2	MYBL2	chr20:42295659-42345136	+	protein_coding	0.755811	1.68858	1.2175e-06	1.76558e-05	6.72669	5.97088	64.5214	68.2099	58.9634	66.0255	53.842	59.9099	91.2446	108.177	102.32	99.5265	116.8	113.532
ENSG00000101188.4_2	NTSR1	chr20:61340189-61394123	+	protein_coding	1.3818	2.60593	1.98205e-06	2.58577e-05	1.49325	0.111446	0.0541197	0.046241	0.0882465	0.177686	0.0779999	0.0432656	2.10326	2.54193	2.29283	2.15168	1.04421	1.13489
ENSG00000101194.17_2	SLC17A9	chr20:61583999-61600937	+	protein_coding	-1.28628	0.410008	1.00697e-07	2.34489e-06	0.577963	1.86424	2.52059	2.89349	3.44338	2.45691	2.53205	2.13162	0.5151	0.658345	0.391354	0.736667	0.384028	0.316709
ENSG00000101210.10_2	EEF1A2	chr20:62119366-62130668	-	protein_coding	1.80258	3.48843	5.9616e-09	2.331e-07	2.55096	0.748378	0.52272	1.1523	0.603865	0.657002	0.541658	0.6738	3.98818	5.50768	4.61942	4.80097	4.61342	5.81866
ENSG00000101306.10_2	MYLK2	chr20:30407111-30422492	+	protein_coding	1.31614	2.48999	7.41712e-06	7.51961e-05	1.66442	0.348278	0.246452	0.32301	0.370514	0.271722	0.205964	0.228014	1.60165	1.39715	2.02038	2.02774	2.57273	3.9787
ENSG00000101311.15_2	FERMT1	chr20:6055492-6104191	-	protein_coding	-1.00058	0.499797	8.24314e-07	1.27247e-05	0.495341	1.49593	1.86245	1.80402	1.56993	1.40643	2.28567	2.08657	0.451963	0.462942	0.464358	0.586702	0.149777	0.382728
ENSG00000101333.16_2	PLCB4	chr20:9049410-9461889	+	protein_coding	1.07699	2.10962	1.05026e-08	3.67484e-07	1.31726	0.240278	0.220244	0.158846	0.308562	0.187239	0.0990908	0.124985	1.37795	1.29505	1.47701	1.90439	1.34022	1.60605
ENSG00000101335.9_2	MYL9	chr20:35169887-35179850	+	protein_coding	0.90167	1.86823	0.000198881	0.00113033	6.56166	5.65999	46.9386	61.7478	59.6417	60.0098	34.2359	41.6111	102.096	103.451	99.6415	100.891	76.4367	82.0855
ENSG00000101347.8_2	SAMHD1	chr20:35518632-35580246	-	protein_coding	-0.704458	0.613673	0.000107098	0.000670396	3.21067	3.91512	14.7928	13.9586	12.8748	10.248	17.4963	16.2854	8.31281	7.17393	8.03404	8.04161	9.43049	8.70724
ENSG00000101400.5_2	SNTA1	chr20:31995761-32031698	-	protein_coding	1.3062	2.4729	0.00150875	0.00618737	3.91619	2.60999	4.06363	4.27428	3.75439	5.59121	8.34242	5.62156	9.37122	10.8798	10.2333	10.8919	25.2355	26.419
ENSG00000101447.14_2	FAM83D	chr20:37554955-37581749	+	protein_coding	0.625797	1.54306	4.49973e-08	1.24047e-06	5.49775	4.87195	29.6475	27.8507	25.7638	27.4846	29.2414	29.9255	41.4414	44.6933	46.2362	43.069	47.0445	42.8768
ENSG00000101460.12_2	MAP1LC3A	chr20:33134658-33148149	+	protein_coding	0.882885	1.84406	0.000979041	0.00429582	3.39178	2.50889	3.56189	4.66609	3.94348	5.10369	6.66839	4.68526	9.13563	8.32975	10.1889	6.27503	15.6806	9.41363
ENSG00000101639.18_3	CEP192	chr18:12991361-13125051	+	protein_coding	-0.599282	0.660083	0.000314035	0.00165969	2.18568	2.78496	6.63411	5.57079	7.40505	5.84765	5.21023	4.97822	3.9764	3.44661	4.0626	4.0117	3.49375	2.51411
ENSG00000101665.8_2	SMAD7	chr18:46446223-46477081	-	protein_coding	0.933757	1.91024	2.43082e-06	3.07423e-05	3.2748	2.34104	4.63401	4.91422	3.45373	3.34019	3.49086	4.84881	9.05528	8.46322	8.70593	8.73443	7.5563	9.68591
ENSG00000101670.11_3	LIPG	chr18:47087069-47125552	+	protein_coding	0.711243	1.63721	8.57322e-05	0.000564897	2.26922	1.55798	1.7861	1.44691	1.92668	1.77615	2.91138	2.00763	3.71107	3.70057	3.26813	3.76306	4.93539	3.69653
ENSG00000101751.10_3	POLI	chr18:51795774-51847636	+	protein_coding	-0.791464	0.577758	0.000362282	0.00186133	0.735198	1.52666	2.12521	1.17922	2.48052	2.62758	1.29353	1.90054	0.778622	0.636467	0.8318	0.867771	0.679612	0.272031
ENSG00000101846.6_2	STS	chrX:7137497-7272851	+	protein_coding	-0.599539	0.659965	8.37616e-05	0.00055486	1.80393	2.40346	5.02656	4.58269	4.3986	3.69177	3.62075	4.56987	3.01871	2.32356	2.69759	2.90076	2.15353	1.98304
ENSG00000101911.12_3	PRPS2	chrX:12809474-12842341	+	protein_coding	-0.935614	0.52282	0.00104566	0.00455154	3.6767	4.61231	27.9302	26.0747	13.6896	22.1946	25.3202	29.4833	12.619	7.22658	14.4725	13.4146	11.9802	12.4824
ENSG00000101955.14_3	SRPX	chrX:38008589-38080177	-	protein_coding	-0.993957	0.502099	4.21641e-07	7.30167e-06	1.06689	2.06085	3.76348	3.05701	2.87989	2.57562	3.43278	3.43904	1.14538	0.996212	1.11282	1.08339	1.47535	0.811427
ENSG00000102054.17_3	RBBP7	chrX:16857406-16888537	-	protein_coding	-0.77736	0.583433	1.27321e-06	1.82887e-05	4.04108	4.81844	23.9039	29.269	28.3977	30.043	27.0163	25.1832	15.8708	13.8868	16.1869	15.1749	13.882	18.1552
ENSG00000102271.13_2	KLHL4	chrX:86772752-86925050	+	protein_coding	-1.21864	0.429686	8.82115e-06	8.66619e-05	2.12585	3.3445	9.56244	8.52101	9.12049	6.80302	11.4709	10.0906	4.22524	3.71083	3.57602	3.71245	3.34816	1.99524
ENSG00000102409.9_2	BEX4	chrX:102470020-102472174	+	protein_coding	0.666146	1.58683	0.000905441	0.00402395	1.08201	0.415863	0.303851	0.499793	0.176411	0.243078	0.272653	0.549163	0.944682	0.764115	1.12424	1.10376	0.827761	2.21224
ENSG00000102452.15_2	NALCN	chr13:101706128-102068843	-	protein_coding	0.914803	1.88531	5.55809e-08	1.44744e-06	1.76798	0.853179	0.884019	1.00034	0.714036	0.668244	0.728827	0.865408	2.45114	2.00697	2.83257	2.57018	2.40835	2.22461
ENSG00000102471.13_2	NDFIP2	chr13:80055259-80130210	+	protein_coding	-0.792154	0.577481	0.00110971	0.00478152	2.80322	3.59538	7.48366	11.1577	11.3128	10.29	13.5742	13.9221	7.57532	7.49799	4.59762	4.14539	6.70287	6.15299
ENSG00000102554.13_2	KLF5	chr13:73629114-73651680	+	protein_coding	-0.664291	0.630999	0.000170115	0.00098951	0.830575	1.49487	1.89816	1.96429	1.97601	1.97255	1.48203	1.65696	1.00906	0.554643	1.20273	1.05368	0.474822	0.518136
ENSG00000102738.7_2	MRPS31	chr13:41303271-41345309	-	protein_coding	-0.78474	0.580457	8.894e-07	1.35455e-05	3.20842	3.99316	14.8588	12.5721	16.1202	15.2044	15.0885	15.9743	7.85337	7.59086	8.26913	7.57365	8.39328	9.98544
ENSG00000102755.11_2	FLT1	chr13:28874481-29069282	-	protein_coding	-1.13414	0.455606	1.84378e-05	0.000159646	1.49125	2.6254	7.28676	7.21627	4.86114	4.2753	3.82325	4.43636	2.00988	1.87005	1.87864	2.08377	1.34064	1.75062
ENSG00000102760.12_2	RGCC	chr13:42031695-42045018	+	protein_coding	-3.00556	0.124519	6.46373e-10	4.30264e-08	1.20002	4.20559	16.3121	16.5614	17.2126	19.2248	17.8137	17.7243	1.79037	0.768207	0.900017	1.04628	1.54882	2.00746
ENSG00000102781.13_3	KATNAL1	chr13:30776767-30881621	-	protein_coding	-0.655256	0.634963	0.000744488	0.00342294	2.96719	3.62244	12.235	13.725	11.7173	10.9836	9.83816	9.84093	8.30302	7.436	7.57074	8.15427	5.43219	4.77449
ENSG00000102802.9_2	MEDAG	chr13:31480328-31499709	+	protein_coding	2.87326	7.32717	5.95142e-11	8.04089e-09	4.6113	1.73805	2.78112	3.18793	1.82064	2.13303	2.07805	2.19903	23.6538	21.8456	21.7002	23.1022	23.1427	27.6606
ENSG00000102804.14_4	TSC22D1	chr13:45006279-45151283	-	protein_coding	-0.642214	0.640729	0.00592297	0.019477	3.24363	3.88585	15.1277	11.7249	14.2097	8.04739	19.1402	17.3486	7.67485	7.34616	7.73414	8.42022	9.76009	10.2652
ENSG00000102981.9_2	PARD6A	chr16:67694849-67696681	+	protein_coding	-1.02615	0.491019	0.000356931	0.0018387	0.708213	1.73436	1.96325	1.72985	2.52684	1.68566	3.76469	2.71698	0.242683	0.85244	0.427013	0.566939	0.478828	1.49838
ENSG00000103034.14_3	NDRG4	chr16:58496750-58547532	+	protein_coding	0.819592	1.76491	2.37125e-07	4.68958e-06	0.860819	0.0412274	0.0355352	0.0323097	0.00459786	0.022308	0.0295419	0.0501978	0.635447	0.829844	0.948602	1.06082	0.540618	0.937697
ENSG00000103037.11_2	SETD6	chr16:58549383-58555085	+	protein_coding	-0.836027	0.560184	3.11579e-06	3.71986e-05	0.783792	1.61982	2.09552	2.06415	2.47477	2.41592	1.75959	1.71245	0.886046	0.83076	0.985025	0.507651	0.573771	0.601314
ENSG00000103064.13_3	SLC7A6	chr16:68298419-68335726	+	protein_coding	0.70293	1.62781	0.0115832	0.034029	3.2388	2.53587	6.45702	4.72146	3.55109	6.97226	2.79078	5.48248	5.20984	9.76736	8.44447	12.5315	7.55269	8.68368
ENSG00000103154.9_3	NECAB2	chr16:84002237-84036381	+	protein_coding	0.772973	1.70879	4.75839e-07	8.13697e-06	0.818267	0.0452947	0.0303654	0.0309739	0	0	0.0249187	0.108874	0.847293	1.14414	0.651839	0.695396	0.716354	0.578712
ENSG00000103196.11_3	CRISPLD2	chr16:84853590-84954374	+	protein_coding	2.33306	5.03874	6.45537e-10	4.30264e-08	2.5353	0.202235	0.25655	0.14961	0.191184	0.128203	0.111942	0.0742235	4.86666	5.71224	5.44403	5.64836	4.01192	3.48816
ENSG00000103202.12_3	NME4	chr16:446725-460367	+	protein_coding	0.675151	1.59676	0.00199954	0.00783172	3.83859	3.16344	7.70963	6.049	9.05983	9.75026	8.98867	6.80003	11.1593	11.9802	11.4892	11.0259	18.1033	17.9336
ENSG00000103222.18_2	ABCC1	chr16:16043434-16236931	+	protein_coding	-0.635597	0.643675	0.0387078	0.0910229	3.19777	3.83337	15.9546	15.9891	17.6083	17.3138	6.48976	10.4114	9.19349	9.50806	10.2428	10.7367	5.66432	5.33469
ENSG00000103241.6_2	FOXF1	chr16:86544133-86549024	+	protein_coding	-2.49553	0.177325	2.84896e-09	1.32686e-07	0.25279	2.74832	7.13808	7.0053	5.91202	6.15769	3.84366	4.89544	0.363315	0.236328	0.157879	0.233479	0.140787	0.041967
ENSG00000103257.8_2	SLC7A5	chr16:87863629-87903094	-	protein_coding	-1.22754	0.427045	4.99356e-06	5.43398e-05	4.50323	5.73077	51.2816	63.1071	57.7621	63.4453	38.9272	43.2577	20.6831	24.5716	23.6879	22.4899	16.9297	22.5954
ENSG00000103260.8_4	METRN	chr16:765115-769655	+	protein_coding	0.956493	1.94059	0.00143548	0.00593413	2.11977	1.16328	0.942344	0.953731	1.06519	1.3083	2.1117	1.2421	2.49058	2.72668	2.4588	2.42039	5.99837	5.2586
ENSG00000103479.15_3	RBL2	chr16:53467889-53525561	+	protein_coding	-0.87064	0.546904	7.20755e-05	0.000491035	2.81244	3.68308	12.4936	10.9893	14.3771	12.8655	10.2506	10.5716	7.00227	6.46209	7.00995	7.21698	4.94529	4.14258
ENSG00000103490.13_3	PYCARD	chr16:31212806-31214771	-	protein_coding	-1.04554	0.484464	0.000160072	0.000942746	0.912603	1.95814	2.60554	2.15787	2.33493	2.93756	4.31949	3.32717	0.564544	0.696559	0.666308	0.560651	1.63675	1.44477
ENSG00000103647.12_2	CORO2B	chr15:68871308-69020145	+	protein_coding	0.694362	1.61817	0.00625296	0.0203065	2.24011	1.54574	3.14504	2.64358	2.01987	2.0405	1.07952	1.14751	3.65946	4.25407	4.88046	4.5663	2.6319	2.82024
ENSG00000103855.17_2	CD276	chr15:73976307-74006859	+	protein_coding	0.683557	1.60609	0.00460282	0.0157616	2.63772	1.95416	2.66668	2.00607	4.68815	2.85246	3.11218	2.40809	5.33342	5.27815	5.91195	4.84959	7.61082	3.19711
ENSG00000103876.11_3	FAH	chr15:80444832-80479288	+	protein_coding	-1.3381	0.395541	6.08836e-06	6.40075e-05	1.75443	3.09253	6.00797	7.31726	6.86623	6.75796	9.78385	9.04155	1.89155	1.99578	1.92976	2.00843	3.39965	3.39114
ENSG00000104067.16_4	TJP1	chr15:29991571-30261068	-	protein_coding	-0.730842	0.602552	0.0282769	0.0708533	3.22621	3.95705	15.3482	18.9183	21.3313	17.6966	8.41125	9.96724	9.92687	9.61426	11.8877	10.6323	6.22649	4.34513
ENSG00000104131.12_3	EIF3J	chr15:44829255-44855227	+	protein_coding	0.678093	1.60002	8.03177e-06	7.98845e-05	5.62316	4.94507	30.1818	29.6364	30.0431	29.3433	27.8123	31.9561	40.2192	48.789	57.4392	51.6099	42.366	51.3942
ENSG00000104213.12_2	PDGFRL	chr8:17433942-17501580	+	protein_coding	-0.854715	0.552975	7.9803e-05	0.000534344	2.46851	3.32323	9.3462	9.06967	7.10893	6.73592	11.0332	11.7847	4.38224	4.78135	4.4396	5.62977	4.17762	3.94751
ENSG00000104219.12_3	ZDHHC2	chr8:17013538-17082308	+	protein_coding	-0.945207	0.519355	5.52632e-07	9.2191e-06	3.049	3.9942	15.321	13.9491	14.5111	12.9364	16.445	16.8002	8.32888	8.08792	7.05782	7.69566	6.71737	6.01058
ENSG00000104267.9_2	CA2	chr8:86376081-86393722	+	protein_coding	-3.93237	0.0654995	6.72876e-11	8.66233e-09	1.05428	4.98665	31.2885	27.0811	23.3673	25.5042	41.5481	39.7691	0.979149	1.16266	1.07058	1.10091	1.18538	0.971202
ENSG00000104320.13_3	NBN	chr8:90945564-91015456	-	protein_coding	-0.652981	0.635965	9.45635e-05	0.000608112	3.43035	4.08333	17.4453	16.179	17.8145	14.4066	15.0157	15.1291	10.9589	9.97753	10.3646	11.3304	9.72315	6.95769
ENSG00000104324.15_3	CPQ	chr8:97657455-98161882	+	protein_coding	2.64735	6.26515	2.03379e-10	1.83795e-08	3.15665	0.509305	0.470449	0.275225	0.413415	0.547941	0.411005	0.436503	6.28339	6.62224	7.90706	7.81452	9.97161	9.51633
ENSG00000104325.6_3	DECR1	chr8:91013633-91064320	+	protein_coding	-0.80487	0.572414	2.38364e-05	0.000198457	2.95274	3.75761	13.5509	11.3696	11.3175	11.5966	12.8644	14.8123	6.66624	5.98834	6.25217	6.01392	6.51242	9.5199
ENSG00000104332.11_3	SFRP1	chr8:41119477-41167016	-	protein_coding	0.623771	1.5409	0.000123937	0.000762041	2.92091	2.29714	3.27016	3.33926	3.72929	3.35558	5.27831	4.8816	6.69709	6.04381	6.98834	6.81576	6.45692	6.47416
ENSG00000104341.16_3	LAPTM4B	chr8:98787285-98865241	+	protein_coding	1.31157	2.48212	0.00632622	0.0205005	3.23055	1.91898	3.15322	3.08841	1.08076	1.92433	4.09005	4.5604	5.14575	7.27301	5.17379	6.54477	10.5596	23.9791
ENSG00000104381.12_2	GDAP1	chr8:75233365-75401107	+	protein_coding	0.700005	1.62451	0.00444526	0.015295	1.88955	1.18954	1.39569	1.05747	1.53463	1.33209	1.22442	1.17212	3.54466	2.95266	3.65247	3.38743	1.01262	2.50601
ENSG00000104447.12_2	TRPS1	chr8:116420724-116821899	-	protein_coding	-0.601126	0.659239	5.57605e-06	5.9679e-05	0.540641	1.14177	1.10688	1.44475	1.23685	1.29738	0.978685	1.20353	0.481394	0.605943	0.412441	0.581776	0.431056	0.24544
ENSG00000104611.11_3	SH2D4A	chr8:19171128-19253729	+	protein_coding	1.62213	3.07829	1.65216e-07	3.54488e-06	2.38548	0.763348	0.644453	0.652597	0.521567	0.698922	0.913064	0.779762	3.202	3.1216	4.1233	4.52928	5.03813	5.87004
ENSG00000104689.9_2	TNFRSF10A	chr8:23047965-23082639	-	protein_coding	-0.992751	0.502519	1.08281e-05	0.000102398	1.95745	2.9502	7.24087	7.18642	6.86763	6.67979	5.96813	6.50269	3.23091	3.36166	3.8104	3.1803	2.22199	1.87017
ENSG00000104723.20_3	TUSC3	chr8:15274724-15624158	+	protein_coding	-1.65773	0.316936	1.05157e-09	6.38593e-08	1.01253	2.67027	4.71723	4.58526	5.39748	5.54356	6.60135	5.54696	1.02401	0.865049	0.93493	0.923403	1.20786	1.17373
ENSG00000104738.16_3	MCM4	chr8:48872745-48890720	+	protein_coding	-0.631978	0.645291	2.8066e-05	0.000228256	4.41058	5.04256	35.2797	32.388	35.5413	35.9235	27.0118	26.9957	21.6453	19.778	22.0451	21.0024	18.593	18.7959
ENSG00000104756.15_2	KCTD9	chr8:25285363-25315992	-	protein_coding	-0.855901	0.55252	0.000145163	0.00087034	4.19753	5.05344	32.9677	32.9663	34.2232	31.5227	28.5069	33.3845	19.7217	18.6433	21.7158	20.8283	14.1336	11.4903
ENSG00000104783.11_2	KCNN4	chr19:44270685-44285409	-	protein_coding	-0.660811	0.632523	1.11446e-05	0.000104759	0.379523	1.04033	0.842896	0.977805	1.14846	1.49023	1.23367	0.737638	0.280247	0.36008	0.335206	0.359888	0.231614	0.244807
ENSG00000104825.16_2	NFKBIB	chr19:39390340-39399533	+	protein_coding	0.764424	1.69869	8.31617e-07	1.28084e-05	3.33038	2.56596	4.07337	5.09388	4.59463	5.21457	4.96272	5.72613	7.93702	9.62638	8.74633	8.84479	9.38391	9.94671
ENSG00000104863.11_2	LIN7B	chr19:49617581-49621717	+	protein_coding	0.905154	1.87274	0.000730363	0.00336707	1.57785	0.672696	0.35432	0.353883	0.764741	0.801169	0.825996	0.541603	1.61306	1.20376	1.27911	2.06342	3.11611	3.27669
ENSG00000104881.15_3	PPP1R13L	chr19:45882892-45909607	-	protein_coding	0.881464	1.84224	0.0387841	0.0911552	3.78744	2.90598	7.60643	8.28578	10.1876	9.54385	2.48177	4.40182	15.3274	19.538	13.9121	20.0994	7.53359	6.69812
ENSG00000104967.6_3	NOVA2	chr19:46436992-46476804	-	protein_coding	0.801663	1.74311	0.0144206	0.0407502	1.46191	0.660243	0.772248	0.724615	0.880788	0.700125	0.173258	0.358587	2.4725	2.60923	2.54372	2.84577	0.629289	0.570245
ENSG00000105048.16_2	TNNT1	chr19:55644162-55660722	-	protein_coding	2.78911	6.91204	1.35358e-07	2.99938e-06	3.1594	0.370285	0.235563	0.178077	0.424643	0.0994593	0.297981	0.576193	5.91953	6.08445	5.99051	6.7992	12.5482	13.048
ENSG00000105122.12_4	RASAL3	chr19:15562435-15575382	-	protein_coding	-0.646065	0.639021	4.08238e-07	7.15124e-06	1.5189	2.16497	3.67829	3.49844	3.46958	3.30759	4.06912	2.9604	1.74185	1.94578	1.70614	1.88447	1.85774	2.07418
ENSG00000105173.13_3	CCNE1	chr19:30302805-30315215	+	protein_coding	-0.763924	0.588892	8.38733e-05	0.000555171	1.3586	2.12252	3.56939	3.9297	4.04846	3.67871	2.66812	2.49343	1.74061	1.50407	1.56964	1.51083	2.09688	1.0738
ENSG00000105281.12_3	SLC1A5	chr19:47278140-47291851	-	protein_coding	0.783466	1.72126	0.0132586	0.0380178	5.23179	4.44833	13.2886	24.3505	24.8315	17.6537	26.9045	21.2286	31.9819	27.4932	34.6153	23.7292	53.9973	60.8518
ENSG00000105290.11_2	APLP1	chr19:36358801-36370693	+	protein_coding	1.14279	2.20807	1.95054e-11	3.85419e-09	1.26224	0.11945	0.0414413	0.117417	0.0382765	0.154744	0.0516798	0.119995	1.40592	1.46824	1.3683	1.54576	1.28418	1.32902
ENSG00000105329.9_2	TGFB1	chr19:41807492-41859816	-	protein_coding	0.780918	1.71822	0.000286346	0.00153558	6.14873	5.36782	38.3296	45.6973	44.5077	49.2042	29.092	38.2602	73.7519	83.0665	74.2049	76.1803	64.5678	52.3373
ENSG00000105426.16_3	PTPRS	chr19:5158506-5340814	-	protein_coding	1.52515	2.87817	8.83715e-07	1.3489e-05	1.62445	0.0992963	0.0519366	0.0642673	0.0181867	0.120065	0.107516	0.068774	2.01212	2.79705	2.96003	2.53599	1.33069	1.3016
ENSG00000105464.3_2	GRIN2D	chr19:48898132-48948188	+	protein_coding	0.750914	1.68286	7.44075e-05	0.000505157	0.890363	0.139449	0.119846	0.136133	0.13763	0.094861	0.018487	0.106541	0.986753	0.941157	1.19186	1.25034	0.426665	0.494753
ENSG00000105472.12_2	CLEC11A	chr19:51226586-51228975	+	protein_coding	1.22552	2.33839	9.68136e-05	0.000620243	3.32515	2.09964	2.17631	3.47297	3.15172	4.39246	3.69036	3.15508	6.31523	7.3858	9.1368	7.93466	15.4964	10.0581
ENSG00000105509.10_2	HAS1	chr19:52216365-52227247	-	protein_coding	0.621447	1.53842	5.70723e-07	9.45156e-06	0.640796	0.0193497	0.0341451	0	0	0.048015	0	0	0.498724	0.524929	0.602534	0.424775	0.488304	0.85002
ENSG00000105520.10_2	PLPPR2	chr19:11466062-11476374	+	protein_coding	0.633635	1.55147	0.000735564	0.00338762	3.61305	2.97941	6.092	7.20839	8.76039	8.81947	5.12676	6.03956	10.6024	12.9664	11.2784	13.0087	10.6366	9.34709
ENSG00000105538.9_3	RASIP1	chr19:49223844-49243978	-	protein_coding	0.951978	1.93452	6.16117e-05	0.00043182	1.37629	0.424307	0.428222	0.254794	0.347976	0.414436	0.316537	0.298102	1.2621	1.40431	1.0585	1.25418	2.81889	2.17571
ENSG00000105617.3_2	LENG1	chr19:54658899-54663620	-	protein_coding	0.695034	1.61892	3.30983e-05	0.000260172	3.20361	2.50858	4.47243	4.73509	4.58156	3.83702	5.5001	5.16559	8.32123	8.70596	7.80039	6.34441	9.8802	8.6094
ENSG00000105649.9_2	RAB3A	chr19:18307594-18314884	-	protein_coding	0.58921	1.50442	1.18952e-05	0.000110649	0.850108	0.260899	0.185478	0.36691	0.38556	0.0597828	0.103927	0.126714	0.850445	0.760213	0.875075	0.89412	0.808749	0.639846
ENSG00000105664.10_2	COMP	chr19:18893583-18902123	-	protein_coding	0.671675	1.59292	9.29079e-07	1.40557e-05	0.686276	0.0146018	0	0	0	0.034943	0	0.0267321	0.396721	0.630163	0.476259	0.772125	0.576548	0.848562
ENSG00000105696.8_2	TMEM59L	chr19:18718240-18731849	+	protein_coding	0.686496	1.60937	3.02906e-05	0.000242289	0.710115	0.0236192	0	0.0297238	0.0713706	0	0	0	0.314098	0.828144	0.497944	0.465554	0.862922	0.951036
ENSG00000105711.11_3	SCN1B	chr19:35521370-35531353	+	protein_coding	0.974368	1.96478	4.45249e-06	4.96726e-05	1.8969	0.92253	0.848379	0.759197	0.813089	1.25976	0.86029	0.871063	3.13869	3.41111	2.68371	2.5927	2.97883	1.77503
ENSG00000105722.9_3	ERF	chr19:42751724-42759309	-	protein_coding	0.75823	1.69141	1.7853e-05	0.000155173	4.23159	3.47336	7.90155	9.89469	10.5957	12.2009	10.1497	10.3413	15.5724	17.381	18.0987	15.8935	19.0988	21.2516
ENSG00000105784.15_2	RUNDC3B	chr7:87256864-87461611	+	protein_coding	-1.85426	0.276574	4.0703e-12	1.18177e-09	0.375196	2.22946	3.69259	3.86147	3.13154	3.65005	3.81304	4.04234	0.359909	0.30757	0.35085	0.242899	0.205967	0.322265
ENSG00000105808.13	RASA4	chr7:102220093-102257204	-	protein_coding	0.998051	1.9973	1.65524e-07	3.5459e-06	1.19748	0.199433	0.135088	0.224434	0.185942	0.171851	0.0729998	0.105891	1.4683	1.52704	1.25049	1.63508	0.988732	0.977951
ENSG00000105825.11_2	TFPI2	chr7:93514709-93520303	-	protein_coding	-3.79506	0.07204	5.19114e-10	3.59585e-08	2.81476	6.60982	84.1905	82.0086	80.1506	80.8308	135.216	134.699	7.60017	5.98028	5.74293	5.78221	6.10902	5.21668
ENSG00000105835.11_3	NAMPT	chr7:105888731-105926772	-	protein_coding	-0.884223	0.541779	1.27638e-05	0.000117091	4.20953	5.09375	33.595	32.6928	33.9023	30.5877	32.7101	35.6055	19.0889	17.9887	20.1404	20.0184	17.2304	11.9779
ENSG00000105856.13_4	HBP1	chr7:106809406-106842974	+	protein_coding	-0.711085	0.61086	0.000351955	0.00181717	2.84585	3.55693	7.54776	10.6352	10.7869	9.03306	13.0077	15.1299	5.98383	5.97438	6.28043	6.31827	6.34975	6.23888
ENSG00000105866.13_2	SP4	chr7:21467652-21554440	+	protein_coding	-0.718281	0.607821	0.000239234	0.0013191	1.25751	1.97579	3.1352	3.08715	3.36256	2.71136	2.54273	2.82033	1.56241	1.81475	1.68898	1.83467	0.809898	0.876962
ENSG00000105889.14_3	STEAP1B	chr7:22459063-22672544	-	protein_coding	-0.924229	0.526962	3.3491e-06	3.94322e-05	4.16134	5.08556	32.9811	32.5192	28.0053	31.3619	37.6924	36.0491	15.8241	16.6112	14.9457	14.7723	21.4407	18.6256
ENSG00000105926.15_3	MPP6	chr7:24612887-24733812	+	protein_coding	-0.722047	0.606237	0.00120778	0.00514881	1.23097	1.95301	3.37145	3.36161	3.32946	3.32051	1.88429	2.27502	1.58349	1.52456	1.77672	1.7794	0.954174	0.700222
ENSG00000105928.13_3	DFNA5	chr7:24737972-24797732	-	protein_coding	-1.1614	0.447079	2.00143e-09	1.01043e-07	0.821876	1.98328	3.10146	3.18513	2.55198	2.95283	3.16174	2.80936	0.656702	0.598029	0.837925	0.834922	0.745873	0.957355
ENSG00000105963.13_4	ADAP1	chr7:937538-995043	-	protein_coding	0.869526	1.82706	0.000168301	0.00098147	1.15817	0.288644	0.155952	0.184076	0.147481	0.30555	0.311811	0.234847	0.895133	1.14759	0.865469	0.76651	2.05401	2.01646
ENSG00000105983.20_3	LMBR1	chr7:156461640-156685924	-	protein_coding	-1.02312	0.492051	1.75006e-05	0.000152705	1.58877	2.61189	6.45576	6.66021	3.9008	5.59466	4.30411	4.33014	2.36847	2.23332	2.29182	2.06111	1.72943	1.47249
ENSG00000105991.7_2	HOXA1	chr7:27132612-27135615	-	protein_coding	1.18206	2.269	9.79151e-09	3.47955e-07	1.18206	0	0	0	0	0	0	0	1.03334	1.54068	1.71481	1.17006	1.14028	1.09491
ENSG00000105996.6_2	HOXA2	chr7:27139973-27142430	-	protein_coding	0.944183	1.9241	2.43425e-05	0.000202178	0.944183	0	0	0	0	0	0	0	1.37979	0.98807	1.14484	1.15511	0.804288	0.285949
ENSG00000105997.22_3	HOXA3	chr7:27145803-27192200	-	protein_coding	0.860868	1.81613	6.37443e-06	6.61989e-05	0.860868	0	0	0	0	0	0	0	1.0457	1.08981	0.994205	0.919291	0.35314	0.620617
ENSG00000106003.12_2	LFNG	chr7:2552163-2568811	+	protein_coding	0.972515	1.96226	3.57902e-05	0.000276867	1.3364	0.363888	0.349065	0.278322	0.335324	0.273636	0.26328	0.225862	2.18975	1.3712	1.28087	2.34518	1.5207	0.782452
ENSG00000106004.4_3	HOXA5	chr7:27180671-27183287	-	protein_coding	1.54586	2.91978	1.44699e-06	2.01486e-05	1.54586	0	0	0	0	0	0	0	2.25907	2.02769	2.75421	2.64647	0.940932	1.36319
ENSG00000106049.8_2	HIBADH	chr7:27565061-27702614	-	protein_coding	-0.622943	0.649345	0.000330003	0.00172537	3.9316	4.55454	24.7623	20.5575	20.8568	18.7059	26.404	24.689	14.7041	16.5243	15.2426	15.8133	13.5283	10.5612
ENSG00000106070.17_3	GRB10	chr7:50657760-50861159	-	protein_coding	0.851002	1.80375	6.09334e-07	9.94614e-06	3.24969	2.39869	4.6003	4.38159	4.61276	4.2998	3.60269	4.2107	9.02483	8.71358	9.24395	9.70874	7.30147	7.35046
ENSG00000106351.12_3	AGFG2	chr7:100136834-100165842	+	protein_coding	-1.10599	0.464582	1.29851e-07	2.89061e-06	1.67248	2.77847	5.98009	6.26614	5.74848	6.03846	5.82199	5.34829	2.06752	2.92599	1.76961	2.10147	2.57802	1.83417
ENSG00000106366.8_2	SERPINE1	chr7:100770370-100782547	+	protein_coding	0.911356	1.88081	2.53792e-07	4.94043e-06	11.1726	10.2613	1174.6	1280.15	1251.71	1339.83	1126.26	1197.4	2125.21	2259.02	2077.07	2165.58	2566.18	2722.78
ENSG00000106392.10_3	C1GALT1	chr7:7196565-7288282	+	protein_coding	-0.967639	0.511342	1.04968e-05	0.000100237	2.31872	3.28636	8.62857	8.37651	9.54424	8.67713	8.07698	9.31456	4.98984	4.10573	4.39333	4.89832	3.39184	2.60847
ENSG00000106415.12_3	GLCCI1	chr7:8008425-8133902	+	protein_coding	-0.762212	0.589592	6.67594e-07	1.0781e-05	0.10615	0.868362	0.994996	0.851358	1.05211	0.812498	0.474782	0.82717	0.0371404	0.101889	0.0753169	0.0845508	0.0752274	0.0850837
ENSG00000106460.18_3	TMEM106B	chr7:12250867-12282993	+	protein_coding	-0.661322	0.632299	0.000136405	0.000823984	2.2826	2.94392	6.805	6.66339	6.79356	6.80267	6.21767	6.90838	4.08991	4.36581	4.58939	4.83308	2.82541	2.89498
ENSG00000106484.14_2	MEST	chr7:130126012-130146137	+	protein_coding	2.77789	6.85847	2.36129e-11	4.29629e-09	4.52713	1.74924	2.58108	2.50656	2.16006	2.12675	2.13456	2.71178	22.7043	24.7809	24.2215	23.5963	20.5899	17.3566
ENSG00000106511.5_2	MEOX2	chr7:15650837-15726437	-	protein_coding	2.11886	4.34351	1.03931e-08	3.64585e-07	2.21585	0.0969866	0	0.093561	0.108078	0	0.151405	0.072837	3.83028	3.30546	3.89495	5.52673	3.28452	2.5309
ENSG00000106546.12_2	AHR	chr7:17338246-17385776	+	protein_coding	-1.74876	0.297556	0.000883248	0.00394398	2.421	4.16977	21.7834	20.8066	22.3599	21.4649	9.09708	11.9114	6.34149	6.13783	6.70408	6.82163	1.89095	1.5844
ENSG00000106605.10_3	BLVRA	chr7:43798279-43846941	+	protein_coding	-0.635195	0.643854	0.00141517	0.00587508	4.18291	4.8181	28.3402	25.8871	24.9471	24.0843	30.9436	29.7244	13.4028	15.4137	15.6628	14.615	22.6021	23.7283
ENSG00000106714.17_3	CNTNAP3	chr9:39072764-39288312	-	protein_coding	1.00906	2.0126	2.08853e-05	0.000177903	2.37127	1.36221	1.76593	1.73432	1.9437	1.54226	1.32525	1.19341	4.62254	4.79198	4.97243	5.00247	3.4494	2.6931
ENSG00000106723.16_2	SPIN1	chr9:91003334-91093609	+	protein_coding	-1.08481	0.471454	0.039667	0.0929743	3.81109	4.8959	27.5778	28.309	28.9682	27.586	29.2457	31.0903	24.1516	5.2867	21.7978	23.7306	18.6929	3.35604
ENSG00000106772.17_3	PRUNE2	chr9:79226292-79521003	-	protein_coding	0.840304	1.79043	7.6189e-09	2.86412e-07	1.16961	0.329302	0.254109	0.174071	0.349414	0.220191	0.258241	0.289471	1.22769	0.987652	1.3686	1.28326	1.26915	1.38458
ENSG00000106804.7_2	C5	chr9:123714613-123812554	-	protein_coding	-1.04102	0.485983	1.16731e-07	2.63726e-06	0.314666	1.35569	1.69944	1.32264	2.10799	1.56957	1.42687	1.31195	0.394515	0.194937	0.211341	0.328194	0.172999	0.176927
ENSG00000106829.18_3	TLE4	chr9:82186688-82341797	+	protein_coding	0.880648	1.8412	0.000105367	0.000661376	3.05704	2.17639	3.57964	4.62048	4.0447	3.64868	2.36652	3.19756	7.54449	7.82059	8.4084	9.12767	6.00733	5.60382
ENSG00000106976.20_1	DNM1	chr9:130953934-131017527	+	protein_coding	1.83945	3.57875	1.21126e-11	2.75482e-09	2.02286	0.183405	0.121092	0.123516	0.185166	0.143348	0.0874994	0.155193	2.88258	3.32057	3.23993	3.52805	2.93571	2.5538
ENSG00000106991.13_2	ENG	chr9:130577291-130617035	-	protein_coding	0.683502	1.60603	0.0163151	0.0449679	6.48557	5.80207	57.8584	66.3881	65.5671	68.9909	32.4175	47.8556	100.268	115.95	107.956	99.8767	69.3801	55.5126
ENSG00000106992.17_3	AK1	chr9:130628759-130640022	-	protein_coding	0.772783	1.70856	0.000193239	0.00110332	4.82037	4.04758	15.9463	14.6158	16.1134	14.1815	16.7055	15.7984	22.434	24.742	23.5962	23.3546	36.264	36.7765
ENSG00000107020.9_3	PLGRKT	chr9:5357973-5437878	-	protein_coding	-1.34086	0.394786	0.00018026	0.00103966	3.57541	4.91626	25.2602	26.596	26.6412	24.9308	38.6026	35.848	9.75002	9.05171	7.01445	8.84714	16.9047	17.7943
ENSG00000107130.9_2	NCS1	chr9:132934857-132999583	+	protein_coding	0.896949	1.86212	2.61334e-07	5.06557e-06	3.81496	2.91801	6.90477	7.57595	5.33927	6.41812	6.804	6.4926	13.3492	15.2466	12.6238	12.3302	12.3561	12.7435
ENSG00000107175.11_3	CREB3	chr9:35732332-35737001	+	protein_coding	0.707959	1.63349	0.00644629	0.0208154	5.62827	4.92031	24.5801	27.0081	25.5428	24.1224	42.7241	35.9025	42.3672	41.2442	38.0661	41.3616	69.2094	67.7983
ENSG00000107201.9_2	DDX58	chr9:32455703-32526322	-	protein_coding	-1.58476	0.333379	6.64217e-08	1.68306e-06	2.75313	4.3379	22.9813	19.0166	21.313	15.7618	19.6011	17.4922	5.93673	5.45134	6.61823	7.18992	4.70011	4.89969
ENSG00000107263.18_2	RAPGEF1	chr9:134452157-134615461	-	protein_coding	0.677235	1.59907	0.0426055	0.0982287	3.57581	2.89857	8.61904	9.72828	9.90287	5.27421	3.22201	4.76851	12.8166	13.316	14.1847	13.7292	7.14503	6.97725
ENSG00000107281.9_3	NPDC1	chr9:139933922-139940655	-	protein_coding	0.846027	1.79754	0.00545919	0.0182299	3.03037	2.18434	4.05096	3.51943	3.07342	3.8616	3.70958	3.1413	5.6544	6.23135	4.43878	5.27297	12.3979	12.5223
ENSG00000107317.12_3	PTGDS	chr9:139869544-139876194	+	protein_coding	1.0632	2.08956	4.70577e-06	5.19959e-05	1.38871	0.32551	0.388428	0.28764	0.218793	0.104819	0.342974	0.197629	1.03318	1.504	1.97618	1.79438	2.37056	1.25842
ENSG00000107562.16_2	CXCL12	chr10:44865613-44881941	-	protein_coding	2.03227	4.09047	5.64225e-09	2.22527e-07	4.04485	2.01258	3.21213	3.87179	2.67914	2.99986	2.57936	2.993	17.1349	18.1319	17.5235	16.0312	12.8198	12.3654
ENSG00000107719.8_2	PALD1	chr10:72238577-72328205	+	protein_coding	-1.08208	0.472347	8.0948e-06	8.03358e-05	0.393236	1.47532	1.78666	1.94456	1.91897	2.30759	1.17911	1.67646	0.294603	0.111045	0.214277	0.356862	0.198442	0.806828
ENSG00000107731.12_2	UNC5B	chr10:72972327-73062621	+	protein_coding	0.99849	1.99791	0.000328331	0.00171861	2.93295	1.93446	3.41153	3.38906	3.47812	3.69685	1.54642	2.00737	7.5729	8.00324	7.03909	7.78076	4.92244	5.14705
ENSG00000107738.19_3	VSIR	chr10:73507316-73533255	-	protein_coding	-0.917747	0.529335	2.14239e-07	4.31832e-06	2.19276	3.11051	7.47337	7.86777	6.99033	8.24178	8.04188	7.27353	3.08022	3.20606	3.54653	3.3815	3.79074	4.57518
ENSG00000107742.12_2	SPOCK2	chr10:73818793-73848790	-	protein_coding	-2.01552	0.247325	6.70051e-08	1.69011e-06	0.0640523	2.07957	4.79854	4.35698	2.20701	2.33491	3.17305	3.11348	0	0.0142769	0.0121822	0.062133	0.108422	0.0799182
ENSG00000107771.15_3	CCSER2	chr10:86088342-86278277	+	protein_coding	1.06102	2.0864	1.29824e-05	0.000118659	4.70316	3.64214	12.3129	11.8364	14.9178	12.1043	8.16585	10.5924	29.0948	27.3503	25.1359	27.7135	21.2742	20.9069
ENSG00000107798.17_3	LIPA	chr10:90973326-91174314	-	protein_coding	-1.05723	0.480554	2.68113e-06	3.32003e-05	3.65787	4.7151	24.275	22.1188	23.7722	20.8771	30.7475	31.6584	10.9096	10.5667	13.2121	12.9878	11.7179	10.6101
ENSG00000107960.10_2	STN1	chr10:105642300-105677963	-	protein_coding	-0.748068	0.5954	0.00162311	0.00657435	3.6038	4.35187	16.2196	18.4259	16.6256	18.2532	26.1221	22.5444	8.02423	10.118	11.2133	9.24555	15.7873	14.3225
ENSG00000107984.9_2	DKK1	chr10:54074056-54077802	+	protein_coding	-0.91721	0.529532	9.48772e-07	1.42902e-05	6.58179	7.499	151.592	173.435	173.412	171.646	202.053	214.301	97.6433	93.1291	81.8268	98.3679	95.9805	103.235
ENSG00000108106.13_2	UBE2S	chr19:55911113-55919145	-	protein_coding	1.34461	2.53962	0.000365784	0.00187509	6.63195	5.28734	27.4186	29.57	34.6161	46.4184	58.2427	39.8089	68.2571	78.9444	87.4259	84.8503	146.922	152.069
ENSG00000108239.8_2	TBC1D12	chr10:96162261-96295687	+	protein_coding	-1.32192	0.400002	1.35474e-09	7.74339e-08	2.07399	3.39591	8.85322	9.3944	10.3948	10.4329	8.41804	9.8249	3.13189	2.71937	3.44848	3.5166	3.09529	3.40632
ENSG00000108262.15_3	GIT1	chr17:27900487-27921072	-	protein_coding	0.709928	1.63572	0.00496702	0.0167731	3.72331	3.01338	7.24861	9.58093	9.60509	8.99001	4.40978	4.54041	12.3061	13.435	13.6942	13.4027	10.6745	10.1857
ENSG00000108342.12_2	CSF3	chr17:38171614-38174066	+	protein_coding	-0.989656	0.503598	5.61672e-05	0.000400867	0.0186605	1.00832	1.10537	1.21517	1.68696	1.39317	0.398278	0.57993	0	0.0422455	0	0.0368934	0	0
ENSG00000108370.16_3	RGS9	chr17:63096930-63223821	+	protein_coding	0.661272	1.58148	2.65097e-05	0.00021766	1.25618	0.594913	0.544113	0.432732	0.427595	0.529922	0.583138	0.551967	1.12517	1.15634	1.22989	1.35595	1.43495	2.16844
ENSG00000108433.16_3	GOSR2	chr17:45000441-45052890	+	protein_coding	0.810451	1.75376	0.0018596	0.00737249	2.35404	1.54359	1.25038	1.54058	1.98134	1.84852	3.03764	2.13076	3.78355	3.21847	3.80675	2.81381	5.2557	6.71658
ENSG00000108448.21_4	TRIM16L	chr17:18601311-18639431	+	protein_coding	-0.729975	0.602914	0.00224456	0.00865723	1.063	1.79298	2.26971	2.51344	1.89842	2.10237	4.2709	2.18027	0.864212	0.967182	0.901919	0.611345	1.73661	1.70423
ENSG00000108511.9_3	HOXB6	chr17:46673113-46682354	-	protein_coding	2.15734	4.46093	1.0787e-09	6.51327e-08	2.15734	0	0	0	0	0	0	0	2.98855	2.75256	3.52796	2.88224	4.42219	4.52396
ENSG00000108669.16_3	CYTH1	chr17:76670130-76778379	-	protein_coding	-0.692203	0.618908	0.000623117	0.00294122	1.72987	2.42207	4.76213	4.80021	5.39489	5.49706	2.80329	3.487	2.26945	2.46421	2.54751	2.82076	1.81904	2.07747
ENSG00000108679.12_3	LGALS3BP	chr17:76967320-76976191	-	protein_coding	-1.1135	0.462171	5.88464e-05	0.000416287	2.67643	3.78993	10.5041	16.0344	11.7803	14.8709	10.731	14.0187	3.3844	5.46739	6.64523	7.09141	4.41916	6.17996
ENSG00000108771.12_3	DHX58	chr17:40253422-40264751	-	protein_coding	-1.91408	0.265341	2.56869e-11	4.51289e-09	0.0206315	1.93471	3.03537	2.26879	2.67567	2.6488	3.37675	3.03205	0.0243436	0	0.0416466	0.0211703	0	0
ENSG00000108798.8_3	ABI3	chr17:47287589-47300587	+	protein_coding	1.55318	2.93464	2.84052e-06	3.46676e-05	4.81456	3.26137	9.58258	9.80064	6.18363	8.02529	8.37153	10.1936	21.7178	24.1277	24.5191	23.2878	38.553	34.4817
ENSG00000108821.13_3	COL1A1	chr17:48260650-48278993	-	protein_coding	1.41754	2.6713	0.0131647	0.0377884	5.24141	3.82386	19.1751	18.4109	18.7647	16.5517	4.5443	9.70704	49.3642	54.5247	56.354	59.3531	18.8524	14.2489
ENSG00000108840.15_4	HDAC5	chr17:42154114-42201070	-	protein_coding	0.667288	1.58809	8.34344e-07	1.28359e-05	1.55794	0.890651	1.01184	0.735936	1.16928	0.82067	0.764217	0.668972	1.85677	2.12976	1.9446	1.99645	1.84821	1.89952
ENSG00000108854.15_2	SMURF2	chr17:62538413-62658186	-	protein_coding	0.710698	1.6366	0.000160017	0.000942746	4.70558	3.99488	17.3976	15.7251	16.537	16.1432	11.8243	12.844	25.5935	26.2807	28.5628	29.7359	20.4031	21.3676
ENSG00000108932.11_2	SLC16A6	chr17:66263167-66287408	-	protein_coding	-0.739893	0.598784	1.33744e-10	1.34305e-08	0.0527459	0.792639	0.751225	0.814612	0.70625	0.764652	0.600755	0.76399	0.0556726	0.0455715	0.0468399	0.0399327	0	0.0363348
ENSG00000108947.4_2	EFNB3	chr17:7608520-7614696	+	protein_coding	0.717569	1.64441	2.81915e-07	5.37292e-06	0.875481	0.157911	0.035465	0.169253	0.172373	0.066792	0.143954	0.113316	0.824028	0.561677	1.02369	0.883346	0.918441	0.830751
ENSG00000108960.7_2	MMD	chr17:53469974-53499353	-	protein_coding	-0.616607	0.652203	4.36583e-05	0.000326265	2.31602	2.93263	6.72522	6.72162	6.7522	6.04332	6.37076	7.25115	3.63017	3.93738	5.38219	4.36424	3.35725	3.47055
ENSG00000109062.11_3	SLC9A3R1	chr17:72744791-72765492	+	protein_coding	-0.694663	0.617853	0.0184253	0.049818	2.91311	3.60777	12.2667	10.9191	12.0105	13.4652	8.54124	10.5627	3.33651	8.53702	8.88989	9.12984	8.26133	3.7597
ENSG00000109079.9_2	TNFAIP1	chr17:26662628-26674035	+	protein_coding	0.833505	1.78201	0.0231267	0.0600089	4.98044	4.14693	22.7499	21.9472	22.75	8.89306	25.0183	8.27768	26.288	25.3154	29.1924	25.1276	39.9206	41.7015
ENSG00000109084.13_2	TMEM97	chr17:26646121-26655711	+	protein_coding	1.02037	2.02844	0.000591084	0.00280359	4.28353	3.26316	8.31476	7.30266	8.0975	8.1793	9.89527	10.1302	9.32878	21.6928	23.5156	23.8085	20.2744	16.9884
ENSG00000109089.7_2	CDR2L	chr17:72983727-73001895	+	protein_coding	0.95735	1.94174	0.00014727	0.000881023	3.13721	2.17986	4.71699	4.59337	3.66322	4.06789	2.1972	2.58176	7.52979	9.00923	8.13951	9.32288	6.64574	6.53156
ENSG00000109099.13_2	PMP22	chr17:15133094-15168643	-	protein_coding	1.7284	3.3136	3.66906e-09	1.6099e-07	5.08091	3.35251	10.3515	10.2514	8.67724	8.92458	8.72428	8.52024	38.3935	32.3633	34.5837	33.8079	25.4384	33.9281
ENSG00000109107.13_3	ALDOC	chr17:26900133-26904282	-	protein_coding	-0.959302	0.514306	7.5657e-08	1.86021e-06	1.51463	2.47393	4.40371	4.04045	5.19148	5.23606	4.31005	4.26497	1.91204	1.68494	2.06416	1.95485	2.03963	1.52865
ENSG00000109193.11_4	SULT1E1	chr4:70706930-70725870	-	protein_coding	-4.09853	0.058374	3.23894e-11	5.35974e-09	1.40689	5.50542	55.573	46.4175	51.4589	34.6139	40.0025	41.754	1.58113	1.189	1.75568	2.17069	1.29064	2.07395
ENSG00000109390.11_3	NDUFC1	chr4:140188034-140223705	-	protein_coding	-0.662466	0.631798	0.000280492	0.00151228	4.44568	5.10814	28.9073	32.358	29.6834	31.8579	46.1044	34.534	20.8298	20.5588	18.4359	18.2725	21.3688	26.154
ENSG00000109534.16_2	GAR1	chr4:110736666-110745896	+	protein_coding	-0.870786	0.546849	0.0151781	0.0424339	3.57022	4.441	22.5103	25.525	22.1296	20.4713	15.3708	19.7129	14.0203	15.0818	16.6481	14.9503	5.38117	5.47255
ENSG00000109576.13_2	AADAT	chr4:170981373-171012850	-	protein_coding	0.742815	1.67344	1.86024e-07	3.84619e-06	1.12094	0.378127	0.416026	0.326048	0.191477	0.268153	0.193161	0.423568	1.17118	1.17354	0.944694	1.31613	1.18506	1.27868
ENSG00000109586.11_2	GALNT7	chr4:174089904-174245118	+	protein_coding	-1.28044	0.411671	1.37326e-06	1.93391e-05	2.28814	3.56858	13.3763	10.2358	11.4798	9.86507	10.0802	10.4936	4.42516	4.12812	4.71834	4.65744	3.14023	2.64343
ENSG00000109738.10_2	GLRB	chr4:157997209-158093242	+	protein_coding	-0.965975	0.511932	4.46081e-06	4.96726e-05	0.896383	1.86236	2.12881	2.62511	2.74542	3.15608	2.3608	2.89427	1.1438	0.930703	1.03242	1.0941	0.55103	0.522293
ENSG00000109790.16_2	KLHL5	chr4:39046659-39128477	+	protein_coding	-1.76511	0.294204	1.1349e-08	3.90097e-07	3.38354	5.14865	37.9181	35.3891	35.7441	34.1624	30.8397	33.2001	10.611	10.6508	10.2325	10.7216	8.12559	6.9492
ENSG00000109846.7_2	CRYAB	chr11:111779289-111794446	-	protein_coding	3.65965	12.6376	1.13024e-10	1.24495e-08	6.6992	3.03955	8.47034	8.70186	9.3446	6.35135	6.58067	4.83402	107.985	96.8764	92.8875	102.986	103.234	114.964
ENSG00000109854.13_2	HTATIP2	chr11:20385231-20405329	+	protein_coding	-1.61011	0.327573	2.39734e-10	2.0837e-08	3.06097	4.67108	25.4515	23.0951	22.7187	21.6335	28.1685	26.3952	7.22691	6.87473	7.77221	7.06318	7.96319	7.22452
ENSG00000109906.13_3	ZBTB16	chr11:113930315-114121398	+	protein_coding	-0.958938	0.514435	1.2768e-05	0.000117091	1.00387	1.96281	3.20553	2.32634	3.44025	3.76016	2.358	2.53422	0.790649	0.769646	1.09597	1.21149	0.806099	1.45169
ENSG00000110002.15_3	VWA5A	chr11:123986069-124018428	+	protein_coding	-3.57772	0.0837528	7.34968e-14	1.32816e-10	0.244228	3.82195	14.178	12.5001	12.6943	10.9109	14.8962	14.0589	0.209518	0.178905	0.137568	0.200288	0.178034	0.203948
ENSG00000110031.12_2	LPXN	chr11:58294344-58345693	-	protein_coding	-1.7229	0.302939	5.4054e-08	1.42359e-06	1.53226	3.25516	10.3624	7.87697	7.70229	7.80212	8.56608	9.24982	1.56685	1.55756	1.85836	2.50016	1.43104	2.66699
ENSG00000110057.7_3	UNC93B1	chr11:67758575-67772452	-	protein_coding	-0.981129	0.506583	6.65989e-05	0.000461324	1.72845	2.70957	4.82027	5.4927	4.73078	5.49662	7.9196	5.24256	1.67694	2.15306	1.84734	2.08772	3.08514	3.36745
ENSG00000110092.3_2	CCND1	chr11:69455855-69469242	+	protein_coding	1.23191	2.34877	0.000137686	0.000830623	6.06525	4.83334	35.9698	38.276	27.3825	29.7357	17.1571	22.3436	71.4076	74.6486	73.9296	78.3736	47.1685	56.4446
ENSG00000110245.11_2	APOC3	chr11:116700422-116703788	+	protein_coding	-1.12256	0.459277	3.47856e-07	6.29554e-06	0	1.12256	1.39152	0.717574	1.38154	0.850333	1.27841	1.5836	0	0	0	0	0	0
ENSG00000110492.15_4	MDK	chr11:46402306-46405387	+	protein_coding	-0.616224	0.652376	0.000287662	0.0015412	3.75622	4.37245	21.486	21.7341	18.5307	24.1504	16.6045	16.8627	11.325	13.7974	11.8796	10.6825	15.5161	12.4306
ENSG00000110721.11_2	CHKA	chr11:67820326-67888911	-	protein_coding	0.871906	1.83008	0.000163641	0.000958803	2.59093	1.71903	1.88012	2.11032	2.15752	3.05807	2.43007	2.2336	3.88571	4.35083	4.82097	4.03289	6.27148	7.58826
ENSG00000110811.19_3	P3H3	chr12:6937575-6949015	+	protein_coding	1.95097	3.86634	6.9278e-09	2.66301e-07	3.22897	1.278	1.25058	1.30155	1.46701	1.89213	1.22145	1.4772	6.55202	7.27989	8.05817	8.68217	9.68312	10.5958
ENSG00000110852.4_3	CLEC2B	chr12:10005583-10022735	-	protein_coding	-2.15896	0.223918	1.34837e-10	1.34305e-08	2.02573	4.18469	18.4127	17.8386	14.5017	16.6878	16.1228	20.0636	3.41109	3.44356	2.74927	2.74221	2.78448	3.37997
ENSG00000110911.14_3	SLC11A2	chr12:51373184-51422349	-	protein_coding	-0.694483	0.617931	1.01895e-05	9.7572e-05	1.88073	2.57522	5.23795	5.10335	4.9518	4.32792	4.71321	5.49541	2.13524	2.54323	3.11803	3.43685	2.59442	2.41884
ENSG00000111052.7_3	LIN7A	chr12:81186299-81331704	-	protein_coding	-1.77616	0.291959	3.26189e-07	5.98277e-06	0.0142224	1.79039	1.99907	1.539	2.49698	1.94908	3.63443	3.70691	0	0.0376337	0.0224547	0	0	0
ENSG00000111057.10_3	KRT18	chr12:53342655-53346685	+	protein_coding	0.834101	1.78275	0.000636566	0.00299434	6.4173	5.5832	41.3752	35.0148	50.183	56.6319	62.3344	41.5831	83.2023	72.9377	78.8436	66.4141	102.776	111.077
ENSG00000111077.17_2	TNS2	chr12:53440753-53458156	+	protein_coding	-0.958152	0.514716	0.0354225	0.0845949	1.53848	2.49663	5.49003	6.07262	8.63415	7.802	1.43413	2.41032	2.34488	2.47661	2.81836	3.17823	0.913836	0.69221
ENSG00000111110.11_2	PPM1H	chr12:63037762-63328817	-	protein_coding	-1.80383	0.286414	3.20144e-12	1.01597e-09	1.30844	3.11227	7.63115	7.97041	8.31425	7.63783	7.07068	7.31705	1.43309	1.25394	1.59735	1.60951	1.60548	1.38344
ENSG00000111186.12_2	WNT5B	chr12:1639057-1756409	+	protein_coding	0.660054	1.58014	0.000762035	0.00348366	2.72746	2.0674	4.21843	3.81282	3.11167	2.58538	2.8224	2.83068	5.309	5.28083	4.33822	4.82817	7.45664	7.09425
ENSG00000111224.13_3	PARP11	chr12:3900213-3982614	-	protein_coding	-0.70646	0.612822	2.2183e-05	0.000187089	1.14399	1.85045	3.00636	3.19776	2.60017	2.27831	2.13584	2.53309	1.23234	1.38116	1.26373	1.52718	0.804863	1.12228
ENSG00000111261.13_3	MANSC1	chr12:12478990-12503475	-	protein_coding	-1.27455	0.413354	4.90482e-05	0.000357157	1.34997	2.62452	4.19102	4.0996	7.3271	6.49751	3.19653	6.92994	1.78385	1.0273	1.95336	1.77718	1.62619	1.25675
ENSG00000111276.10_3	CDKN1B	chr12:12867992-12875305	+	protein_coding	-0.734017	0.601227	3.13968e-08	9.23364e-07	4.0702	4.80422	26.6095	25.9517	26.8553	26.0545	27.1148	29.1683	15.4821	15.572	16.1126	17.0286	16.9449	13.8562
ENSG00000111319.12_3	SCNN1A	chr12:6456009-6486896	-	protein_coding	-0.659036	0.633302	0.000869233	0.00389158	0.221885	0.88092	0.832135	1.13246	1.2323	1.26572	0.309356	0.507461	0.197357	0.250377	0.19724	0.242159	0.0435937	0.0829524
ENSG00000111331.12_2	OAS3	chr12:113376157-113411054	+	protein_coding	-1.46373	0.362554	1.65469e-06	2.24007e-05	1.53658	3.00031	9.04854	7.27411	6.75336	5.08906	6.57217	7.83104	2.03392	1.80996	2.70515	2.37848	1.3764	1.35062
ENSG00000111335.12_2	OAS2	chr12:113416200-113449528	+	protein_coding	-3.25093	0.105044	1.55484e-10	1.50477e-08	0.251645	3.50258	11.7297	10.6398	8.91367	7.6646	12.7468	11.1154	0.174739	0.0879351	0.513287	0.206807	0.102441	0.10677
ENSG00000111341.9_2	MGP	chr12:15034115-15038860	-	protein_coding	-3.25371	0.104842	4.78672e-10	3.36699e-08	2.22398	5.47769	39.4131	36.684	43.5087	46.1963	56.3034	41.7056	5.44279	4.01411	3.54035	3.62557	3.07331	2.76215
ENSG00000111581.9_3	NUP107	chr12:69080514-69139589	+	protein_coding	-0.661786	0.632095	0.000264675	0.00144355	2.95631	3.6181	12.7898	11.123	12.4485	11.2383	9.64666	10.6992	7.23327	6.84985	7.70086	8.61578	6.07034	4.71753
ENSG00000111666.10_4	CHPT1	chr12:102090725-102137918	+	protein_coding	-0.75263	0.59352	1.00021e-05	9.62541e-05	2.21589	2.96852	5.93818	6.539	7.03175	5.98048	7.89968	7.81164	3.86254	3.50399	2.82438	3.65725	3.80504	4.36354
ENSG00000111684.10_2	LPCAT3	chr12:7085348-7125814	-	protein_coding	-0.590798	0.663975	7.60487e-06	7.67574e-05	2.61465	3.20545	7.44524	7.91382	7.89449	7.76729	9.70789	8.80074	5.30075	4.68452	5.10665	4.61126	6.01339	5.13282
ENSG00000111716.12_3	LDHB	chr12:21788276-21910791	-	protein_coding	-0.589286	0.664672	6.73549e-06	6.92113e-05	7.0046	7.59389	191.173	201.396	177.93	174.06	187.635	225.227	131.932	137.422	120.997	123.323	137.12	115.3
ENSG00000111799.20_2	COL12A1	chr6:75794042-75915767	-	protein_coding	-2.7369	0.150007	1.73608e-05	0.000151862	1.27064	4.00753	22.5839	21.7242	23.4815	18.4894	5.79567	8.96214	1.78819	1.59838	2.05533	2.08871	0.772881	0.627264
ENSG00000111817.16_3	DSE	chr6:116575336-116766023	+	protein_coding	-0.87317	0.545946	1.6189e-09	8.87209e-08	0.308502	1.18167	1.3566	1.28811	1.1907	1.16881	1.34332	1.2694	0.199817	0.191559	0.191101	0.187395	0.285848	0.387544
ENSG00000111846.16_4	GCNT2	chr6:10492456-10629601	+	protein_coding	-1.60627	0.328446	3.71801e-06	4.30331e-05	0.478214	2.08448	4.59641	3.96253	2.01894	4.08649	1.84443	3.79816	0.436066	0.217582	0.38734	0.468089	0.433382	0.431433
ENSG00000111859.16_3	NEDD9	chr6:11183531-11382581	-	protein_coding	1.22725	2.34121	5.07153e-07	8.56511e-06	3.1778	1.95055	3.03846	3.10609	3.4472	3.44321	1.81177	2.61937	8.12665	8.42498	8.35009	8.69769	7.50187	7.28108
ENSG00000111911.6_2	HINT3	chr6:126277927-126301390	+	protein_coding	-0.921023	0.528134	0.000119169	0.000734501	2.42164	3.34266	10.5038	9.52476	8.02818	8.63191	8.33264	10.0939	5.31843	4.72402	5.24521	5.41162	3.62478	2.53186
ENSG00000111962.7_2	UST	chr6:149068464-149398126	+	protein_coding	0.776811	1.71334	0.000269306	0.00146157	1.16387	0.38706	0.234496	0.407576	0.28422	0.234786	0.415533	0.282291	1.05599	0.630709	0.97188	1.58679	1.32161	2.18662
ENSG00000112039.3_2	FANCE	chr6:35420138-35434880	+	protein_coding	-0.672399	0.627462	0.000298759	0.00159212	2.48202	3.15442	6.73773	6.56661	8.18369	8.39818	9.65632	8.25283	3.95225	4.0059	3.95553	4.19186	6.18126	5.63872
ENSG00000112096.16_3	SOD2	chr6:160090089-160183561	-	protein_coding	-1.15288	0.449727	4.64821e-08	1.27113e-06	1.11091	2.26378	3.97936	3.39942	3.41466	3.41998	4.91247	3.85452	0.98043	1.29871	1.29045	1.00335	1.28666	1.12506
ENSG00000112118.18_2	MCM3	chr6:52128807-52149679	-	protein_coding	-0.833007	0.561358	6.40823e-05	0.000446157	4.71537	5.54838	46.3482	48.761	45.4004	45.0368	43.337	46.0744	28.1361	25.851	30.2861	27.2935	26.4883	16.2676
ENSG00000112183.14_2	RBM24	chr6:17281577-17294106	+	protein_coding	-0.826926	0.563729	1.9632e-06	2.56854e-05	0.77227	1.5992	2.44846	2.01599	2.18577	2.06028	1.72868	1.79545	0.854847	0.913788	0.847801	0.696638	0.565119	0.425161
ENSG00000112186.11_2	CAP2	chr6:17393447-17558023	+	protein_coding	-1.65152	0.318305	6.03245e-07	9.906e-06	1.43103	3.08255	7.00446	7.2962	10.0872	7.18211	8.70096	5.32297	2.42644	1.82454	2.04982	1.44897	1.19795	1.41897
ENSG00000112208.11_2	BAG2	chr6:57037124-57054631	+	protein_coding	-0.992756	0.502517	1.09917e-06	1.62682e-05	2.31372	3.30647	9.08959	8.55411	7.99927	8.14598	10.2525	9.50353	4.78608	4.40287	4.13989	4.33936	3.25707	3.13454
ENSG00000112234.8_2	FBXL4	chr6:99316414-99395882	-	protein_coding	-0.7206	0.606845	2.36146e-06	2.99484e-05	1.21606	1.93666	3.05677	2.62658	3.2971	2.7176	2.78863	2.53477	1.5554	1.38328	1.48058	1.45114	1.20259	0.927241
ENSG00000112245.10_2	PTP4A1	chr6:64231653-64293492	+	protein_coding	-0.700101	0.615529	0.000471965	0.00233012	4.74243	5.44253	42.6315	44.2037	39.8944	39.2892	41.049	48.4999	30.6725	31.8657	27.9598	28.4302	20.7434	18.0694
ENSG00000112276.13_2	BVES	chr6:105544697-105585049	-	protein_coding	0.825967	1.77272	0.000283228	0.00152403	1.61906	0.793094	0.683514	0.976457	0.958417	1.07672	0.333308	0.500213	2.43019	2.44574	2.47608	2.49259	1.2976	1.54802
ENSG00000112297.14_4	CRYBG1	chr6:106808683-107019853	+	protein_coding	-2.86616	0.137151	7.18424e-10	4.73605e-08	0.728563	3.59472	13.4986	12.9102	12.8311	10.4892	8.34545	9.38273	0.857791	0.760415	0.776001	0.701593	0.577868	0.327193
ENSG00000112343.10_2	TRIM38	chr6:25963030-25991454	+	protein_coding	-0.766535	0.587828	4.50334e-06	5.00428e-05	1.54592	2.31246	4.53018	4.01064	4.37491	3.99282	3.64317	3.35065	1.73028	1.86632	2.43729	2.30038	1.66289	1.62151
ENSG00000112357.12_2	PEX7	chr6:137143702-137235075	+	protein_coding	-0.770928	0.58604	1.69053e-05	0.000148545	1.893	2.66392	4.80963	5.35081	4.61657	4.50925	6.8122	6.26458	2.73146	2.75015	2.22224	2.598	3.27192	2.78723
ENSG00000112367.10_2	FIG4	chr6:110012515-110146631	+	protein_coding	-0.849234	0.555079	7.57381e-06	7.65683e-05	1.68661	2.53585	5.4586	3.78433	4.91724	3.83778	5.73047	5.38893	2.33897	2.2838	2.01594	2.55431	2.3414	1.83292
ENSG00000112378.11_2	PERP	chr6:138409642-138428648	-	protein_coding	-2.27984	0.205921	1.40954e-12	6.2047e-10	2.35217	4.63201	25.3399	23.6662	22.5282	22.1977	23.77	25.4582	4.05154	3.94542	3.79348	3.77704	4.3535	4.7858
ENSG00000112406.4_2	HECA	chr6:139456249-139501939	+	protein_coding	-0.659438	0.633125	0.0209723	0.055452	2.23616	2.89559	7.33417	8.01082	7.78287	7.82461	3.91959	4.93027	4.90436	4.94659	4.84803	4.44448	2.10784	2.14799
ENSG00000112414.14_3	ADGRG6	chr6:142622991-142767403	+	protein_coding	-1.90725	0.2666	1.31895e-06	1.88071e-05	2.71658	4.62383	28.5865	24.1759	30.9376	23.1848	19.1781	18.3493	7.34601	6.01751	4.79695	7.82123	4.84308	3.6089
ENSG00000112559.13_2	MDFI	chr6:41604620-41621984	+	protein_coding	1.0359	2.0504	0.000105446	0.000661573	3.14637	2.11046	3.10137	3.30534	2.80599	2.66553	5.13097	3.29348	6.15284	7.33409	7.13063	6.40003	10.0728	11.1325
ENSG00000112576.12_3	CCND3	chr6:41902671-42018095	-	protein_coding	-0.672094	0.627595	0.0023582	0.00903424	2.93329	3.60539	9.54089	10.3785	12.6783	9.40929	13.9002	11.7753	5.5548	7.11185	5.08743	5.26945	10.4122	7.57715
ENSG00000112624.12_3	BICRAL	chr6:42714696-42836298	+	protein_coding	-0.726745	0.604266	0.00918461	0.0281016	1.40019	2.12693	4.08255	4.04827	4.23574	4.11576	1.99448	2.37435	2.19506	2.24511	2.03585	2.24695	0.907633	0.733938
ENSG00000112699.10_3	GMDS	chr6:1624041-2245926	-	protein_coding	-0.814893	0.568451	0.000149468	0.00089223	1.3458	2.16069	3.0333	3.70907	2.74661	3.55506	4.47122	3.50592	1.19877	0.990293	1.46956	1.48646	1.95692	2.39324
ENSG00000112759.16_2	SLC29A1	chr6:44187242-44201888	+	protein_coding	0.797476	1.73806	6.2003e-06	6.48845e-05	6.41739	5.61992	41.8291	49.012	49.9463	53.3737	50.613	45.1858	80.185	84.0341	73.7896	74.2878	98.8469	99.4612
ENSG00000112773.15_4	FAM46A	chr6:82201156-82462491	-	protein_coding	-0.930454	0.524693	0.000100465	0.000640154	1.01669	1.94715	2.91221	2.83583	2.5754	2.11179	3.231	3.65412	0.82682	0.544773	0.815051	1.04605	1.30059	1.84528
ENSG00000112874.9_2	NUDT12	chr5:102884556-102898494	-	protein_coding	-0.800134	0.574296	9.48725e-06	9.18829e-05	1.79482	2.59495	5.60933	3.91024	5.54312	5.01296	4.82553	5.53856	2.66649	2.25931	3.08229	2.7469	1.92456	2.26402
ENSG00000112972.14_3	HMGCS1	chr5:43289497-43313614	-	protein_coding	-0.796606	0.575702	0.0101653	0.0305674	4.42886	5.22546	43.8643	36.4881	20.3819	34.9727	42.8831	47.3076	29.2789	29.0745	22.5811	17.0255	17.4431	12.9859
ENSG00000113070.7_2	HBEGF	chr5:139712428-139726216	-	protein_coding	1.18287	2.27028	3.01879e-06	3.62929e-05	5.29924	4.11637	18.3893	18.555	17.8224	19.0488	12.0828	13.5419	36.1796	39.4098	40.5873	46.2857	32.7228	36.4092
ENSG00000113083.13_3	LOX	chr5:121398890-121414055	-	protein_coding	1.40173	2.64219	5.26143e-08	1.39142e-06	6.04044	4.63871	25.2766	23.1115	25.2883	21.3703	21.2235	27.8605	57.4894	57.4138	80.8397	69.8233	64.8787	61.3235
ENSG00000113140.10_3	SPARC	chr5:151040657-151066726	-	protein_coding	0.808833	1.75179	3.0716e-06	3.67676e-05	8.42516	7.61633	182.625	186.356	180.589	192.239	217.546	215.335	312.506	320.321	320.161	313.868	399.092	403.723
ENSG00000113269.13_3	RNF130	chr5:179338651-179499118	-	protein_coding	1.21508	2.32153	1.26839e-08	4.29491e-07	2.09065	0.875571	0.865405	0.896276	0.751094	0.796227	0.986884	0.725521	2.71961	3.27656	2.88247	3.23914	4.11402	3.46009
ENSG00000113319.12_2	RASGRF2	chr5:80256491-80525975	+	protein_coding	-1.27267	0.413893	1.08358e-13	1.32816e-10	0.0136833	1.28635	1.59981	1.47818	1.38773	1.46488	1.34022	1.37288	0.00861281	0.00869254	0.0110099	0.0291432	0	0
ENSG00000113369.8_2	ARRDC3	chr5:90664541-90679176	-	protein_coding	-1.36823	0.387367	1.40389e-06	1.97296e-05	2.68979	4.05802	17.5612	12.9857	13.1719	14.605	17.1816	19.4597	5.89711	6.66929	6.4005	5.69562	4.25352	4.23988
ENSG00000113448.18_3	PDE4D	chr5:58264865-59817947	-	protein_coding	0.760736	1.69435	1.42617e-07	3.14401e-06	1.35386	0.593122	0.504914	0.465371	0.547914	0.451551	0.529737	0.554637	1.95276	1.63746	1.49962	1.68791	1.32145	1.29534
ENSG00000113583.7_2	C5orf15	chr5:133291193-133304478	-	protein_coding	-0.746514	0.596042	0.00018176	0.0010462	4.95445	5.70097	51.4829	47.3619	53.3527	48.7557	49.5057	56.1537	30.3192	32.2598	36.4791	37.0845	26.4233	20.7893
ENSG00000113594.9_2	LIFR	chr5:38475065-38608456	-	protein_coding	0.594516	1.50997	0.000547739	0.00262353	1.88994	1.29542	1.67284	1.56012	1.50185	1.47197	1.29428	1.25208	3.27261	2.6626	3.02243	3.47421	2.4983	1.63041
ENSG00000113657.12_4	DPYSL3	chr5:146770374-146889619	-	protein_coding	-0.670539	0.628272	1.54733e-05	0.000137974	3.5847	4.25524	21.7552	19.0909	16.297	15.3979	17.9784	18.7075	10.0728	10.2349	11.0685	12.3011	10.1049	12.4503
ENSG00000113739.10_2	STC2	chr5:172741716-172756506	-	protein_coding	-1.39285	0.380812	0.00031647	0.00166997	3.61813	5.01098	34.4959	41.9394	36.4884	37.7045	18.2453	25.4064	13.2272	14.1786	13.5695	15.3258	6.6548	7.71745
ENSG00000113790.10_3	EHHADH	chr3:184908412-184999778	-	protein_coding	-0.76359	0.589029	1.41035e-06	1.98001e-05	0.889095	1.65268	2.42888	1.99125	2.21491	1.99555	2.11511	2.13994	0.730704	0.546343	1.18606	0.859559	0.878375	0.974608
ENSG00000114127.10_3	XRN1	chr3:142025449-142166904	-	protein_coding	-0.855045	0.552848	0.000604639	0.00286092	2.51956	3.3746	10.2426	9.22184	11.1712	10.1153	8.05867	7.83942	5.71781	5.28386	5.59282	6.17274	4.04046	2.53258
ENSG00000114166.7_2	KAT2B	chr3:20081515-20195896	+	protein_coding	-0.713104	0.610006	4.91695e-05	0.000357659	2.06212	2.77522	6.50071	6.06761	6.77626	6.04227	4.85385	5.05686	3.72833	3.21695	3.41435	3.81322	2.49676	2.57998
ENSG00000114315.3_2	HES1	chr3:193853934-193856521	+	protein_coding	1.78954	3.45704	2.44365e-09	1.17416e-07	4.83124	3.0417	7.57541	7.22239	6.55666	7.27311	7.50214	7.31927	25.9902	27.6779	23.7448	24.1937	28.8083	36.0016
ENSG00000114316.12_3	USP4	chr3:49315264-49378145	-	protein_coding	-0.729305	0.603195	1.21837e-07	2.73453e-06	3.11475	3.84406	13.318	12.7215	13.4213	11.9061	14.9356	14.0525	7.04566	7.31666	8.20259	7.60147	8.38939	7.49524
ENSG00000114405.10_2	C3orf14	chr3:62304648-62321888	+	protein_coding	-0.733587	0.601407	6.13738e-06	6.43247e-05	2.30423	3.03782	6.53997	6.6749	6.71534	6.24276	8.5545	8.92984	3.91091	4.07662	4.36024	3.57546	3.80926	3.93659
ENSG00000114423.18_3	CBLB	chr3:105374305-105588396	-	protein_coding	-0.776856	0.583637	2.5612e-06	3.20938e-05	0.536253	1.31311	1.67722	1.68643	1.74724	1.60443	1.02676	1.25654	0.405187	0.625425	0.519814	0.389938	0.382099	0.394902
ENSG00000114439.18_3	BBX	chr3:107241783-107530171	+	protein_coding	-0.730337	0.602763	0.0298476	0.0737729	2.53113	3.26147	13.6918	13.4303	6.19223	6.54731	10.7275	4.76222	3.1297	3.22479	6.96219	6.3567	4.28604	5.90419
ENSG00000114541.14_3	FRMD4B	chr3:69219141-69591734	-	protein_coding	1.43085	2.69605	1.32896e-07	2.95358e-06	2.35382	0.922973	1.1926	1.28623	0.802217	0.718858	0.690551	0.769715	4.8522	3.94456	4.44952	4.77291	3.70754	3.16326
ENSG00000114554.11_2	PLXNA1	chr3:126707437-126756235	+	protein_coding	-0.725112	0.60495	0.04046	0.0944557	1.73561	2.46072	5.8335	5.79223	7.14233	5.89027	1.75977	2.87256	2.61829	2.91013	3.27437	3.41289	1.27265	1.24909
ENSG00000114573.9_3	ATP6V1A	chr3:113465866-113530903	+	protein_coding	-0.644807	0.639578	4.12025e-06	4.65438e-05	4.17968	4.82448	26.1373	24.7637	26.4012	25.4481	30.5369	31.3837	16.9825	18.3405	17.4862	18.2729	17.1274	14.7688
ENSG00000114631.10_3	PODXL2	chr3:127348024-127391652	+	protein_coding	0.813537	1.75751	7.53846e-06	7.63129e-05	1.00795	0.194409	0.068959	0.242637	0.191763	0.172447	0.161301	0.04137	0.729532	1.3457	0.911654	0.776571	1.49071	0.9276
ENSG00000114698.14_3	PLSCR4	chr3:145910126-145968966	-	protein_coding	-0.724184	0.605339	0.00585028	0.0192694	4.79363	5.51781	46.8371	46.6304	52.4291	48.8454	32.741	44.181	29.889	27.8688	36.2086	37.1531	18.7408	17.2133
ENSG00000114738.10_2	MAPKAPK3	chr3:50648951-50686728	+	protein_coding	-0.735182	0.600742	0.00457512	0.0156825	2.54237	3.27755	7.20885	8.38706	7.5759	8.10154	11.1393	10.3881	3.87414	3.81295	3.41831	4.10264	7.47795	7.71621
ENSG00000114796.15_2	KLHL24	chr3:183353356-183402265	+	protein_coding	-1.00296	0.498974	2.62501e-08	7.83827e-07	1.22399	2.22696	3.4695	3.46998	3.90435	3.35258	3.80156	4.14053	1.34821	1.22919	1.53935	1.62519	1.25832	1.06158
ENSG00000114904.12_2	NEK4	chr3:52742465-52804965	-	protein_coding	-0.948011	0.518347	0.000426081	0.00213604	1.73868	2.68669	5.64764	6.20543	6.39714	6.54393	3.87893	4.46182	2.74195	2.52249	3.25861	3.1446	1.55667	1.32273
ENSG00000115008.5_2	IL1A	chr2:113531492-113542167	-	protein_coding	-0.926433	0.526158	7.60462e-08	1.86642e-06	0.0467208	0.973154	1.14324	0.915514	0.824591	0.682893	1.01495	1.25346	0	0.088015	0.036797	0.076608	0	0
ENSG00000115159.15_2	GPD2	chr2:157291802-157470247	+	protein_coding	-1.72333	0.302848	2.27938e-05	0.000191135	1.89286	3.6162	12.3434	10.8863	12.3196	10.1183	10.6899	11.3836	3.77171	3.72167	3.02244	3.50128	2.72813	0.724902
ENSG00000115163.14_3	CENPA	chr2:26987157-27023935	+	protein_coding	0.648111	1.56712	0.000799418	0.00362661	4.12375	3.47564	9.73652	9.339	8.988	11.1574	11.3374	10.3958	12.6732	15.0224	14.6229	14.7644	21.7885	21.8288
ENSG00000115170.13_2	ACVR1	chr2:158592956-158732374	-	protein_coding	0.594114	1.50955	0.00456624	0.01566	4.16755	3.57344	12.6896	11.749	11.5853	10.8177	8.31613	10.7699	18.2639	19.3055	20.4023	20.3693	15.571	10.3602
ENSG00000115226.9_2	FNDC4	chr2:27714750-27718112	-	protein_coding	0.757943	1.69108	0.00257402	0.00969769	3.60255	2.8446	4.67227	5.98662	4.76985	5.77081	8.21831	8.62469	9.49182	10.0668	8.86341	9.57561	15.0306	15.5461
ENSG00000115232.13_2	ITGA4	chr2:182321929-182400914	+	protein_coding	3.58918	12.0351	1.00142e-13	1.32816e-10	3.93276	0.343583	0.18335	0.162558	0.274574	0.208258	0.414021	0.393362	13.7406	12.9258	14.7471	16.2403	14.3945	13.7854
ENSG00000115267.5_2	IFIH1	chr2:163123589-163175213	-	protein_coding	-2.47096	0.180372	1.52711e-11	3.20599e-09	0.154001	2.62496	5.67393	4.43484	5.39116	4.37899	5.64956	5.6451	0.152615	0.101213	0.049995	0.224776	0	0.162395
ENSG00000115271.10_3	GCA	chr2:163175350-163228105	+	protein_coding	-1.2273	0.427115	4.91836e-09	1.98303e-07	0.119104	1.34641	1.16667	1.57943	1.8225	1.31448	1.68107	1.76149	0.0505552	0.0382237	0.152448	0.136208	0.0636527	0.0802759
ENSG00000115295.19_3	CLIP4	chr2:29320571-29412509	+	protein_coding	-0.788035	0.579132	0.000116633	0.000721147	1.49172	2.27975	4.9313	4.60234	3.03277	2.95376	3.77336	4.18423	1.89725	1.7699	1.22433	2.4579	1.79488	1.86738
ENSG00000115325.13_2	DOK1	chr2:74776153-74784681	+	protein_coding	-1.04751	0.483804	0.00298091	0.0109084	1.84269	2.8902	7.46509	5.41522	7.28307	4.64955	9.80375	5.04773	2.47347	1.39055	2.15862	1.52058	4.35556	5.01405
ENSG00000115350.11_2	POLE4	chr2:75185619-75197255	+	protein_coding	0.814862	1.75913	0.0321241	0.0783915	4.06595	3.25108	7.07157	6.97599	5.49032	8.50754	14.6865	10.952	11.3108	13.4893	10.116	11.4918	27.8285	29.91
ENSG00000115355.15_2	CCDC88A	chr2:55514978-55647057	-	protein_coding	0.594871	1.51034	0.0371143	0.0878815	4.07747	3.4826	12.0952	10.7009	13.5081	14.0184	6.7534	6.53608	19.2281	16.6734	19.455	21.6474	10.8151	10.8336
ENSG00000115363.13_2	EVA1A	chr2:75696428-75796848	-	protein_coding	1.09308	2.1333	0.000105072	0.000661046	3.82973	2.73664	4.41911	6.51544	4.7048	5.0209	7.43545	6.42985	9.99036	12.1938	11.3679	11.4377	18.0874	18.4096
ENSG00000115415.18_4	STAT1	chr2:191829084-191885686	-	protein_coding	-1.33617	0.396072	4.1925e-06	4.7209e-05	3.34081	4.67697	28.5122	23.6681	21.2347	17.8029	29.9772	28.7178	8.84451	8.27134	11.9417	10.1496	9.03285	7.18629
ENSG00000115425.13_3	PECR	chr2:216861052-216947678	-	protein_coding	0.793239	1.73296	2.85176e-05	0.000231362	1.68939	0.89615	1.04566	0.741506	0.694121	0.761389	1.16335	0.806849	1.94491	1.94674	1.93475	1.82975	2.91894	2.98509
ENSG00000115461.4_3	IGFBP5	chr2:217536828-217560248	-	protein_coding	3.73609	13.3253	1.53177e-12	6.33733e-10	4.05688	0.320785	0.274151	0.18809	0.15691	0.449642	0.318627	0.134077	16.1469	14.9017	16.3051	17.8711	12.3769	16.8441
ENSG00000115602.16_3	IL1RL1	chr2:102927962-102968497	+	protein_coding	-0.967664	0.511333	0.000267657	0.00145516	0.425457	1.39312	1.85382	1.65814	1.2451	0.866193	2.02559	2.41367	1.01845	0.226292	0.137006	0.230765	0.301216	0.301824
ENSG00000115677.16_3	HDLBP	chr2:242166679-242256476	-	protein_coding	0.685917	1.60872	4.81508e-05	0.00035156	5.66934	4.98342	35.7779	32.364	33.634	30.9762	24.959	27.4104	56.5082	51.4328	51.253	52.4132	48.9678	40.3112
ENSG00000115718.17_2	PROC	chr2:128176003-128186822	+	protein_coding	2.46746	5.53069	6.2687e-10	4.21393e-08	2.86373	0.39627	0.244127	0.260563	0.423298	0.358783	0.37174	0.249074	5.76753	5.46817	5.20387	5.96584	9.01054	6.85422
ENSG00000115738.9_2	ID2	chr2:8818975-8824583	+	protein_coding	1.45598	2.74342	0.000145327	0.000870941	3.16993	1.71396	2.60378	2.71989	3.12698	1.76759	2.56941	1.28086	8.0558	17.1197	6.90315	6.92635	6.10236	6.27977
ENSG00000115758.12_3	ODC1	chr2:10580094-10588630	-	protein_coding	-0.754626	0.5927	0.00187204	0.00741103	6.78393	7.53855	172.959	168.567	138.481	162.179	262.108	232.819	93.1504	107.695	96.8714	90.9616	140.627	136.263
ENSG00000115828.15_2	QPCT	chr2:37571717-37600465	+	protein_coding	-3.223	0.107098	3.67758e-10	2.75738e-08	0.0347313	3.25773	7.79019	6.74723	7.26972	7.36037	11.8481	11.6576	0.0357556	0.0814312	0	0.0315134	0	0
ENSG00000115841.19_3	RMDN2	chr2:38150330-38294285	+	protein_coding	-0.729362	0.603171	2.98833e-10	2.39875e-08	0.371684	1.10105	1.10681	1.05387	1.14274	1.23932	1.2374	1.09731	0.209563	0.303363	0.329204	0.308953	0.334235	0.281995
ENSG00000115902.10_2	SLC1A4	chr2:65215611-65250999	+	protein_coding	0.828749	1.77614	0.000529555	0.00255256	3.32959	2.50084	4.51303	4.14464	4.47087	5.08413	5.41625	4.42851	9.36547	8.29169	6.06603	10.5326	7.52676	14.4262
ENSG00000115935.17_4	WIPF1	chr2:175424300-175547644	-	protein_coding	1.22746	2.34154	7.72863e-06	7.74907e-05	1.72393	0.496473	0.527616	0.453948	0.370976	0.566206	0.262314	0.309514	2.86056	2.5333	2.82596	3.07579	1.31437	1.63943
ENSG00000115963.13_2	RND3	chr2:151324709-151395525	-	protein_coding	1.80282	3.48903	5.36074e-05	0.000385018	6.07991	4.27708	23.1153	26.2026	21.0551	23.1651	17.423	7.24557	68.7332	65.9579	74.1751	76.8148	63.6364	53.2694
ENSG00000116096.5_2	SPR	chr2:73114489-73119287	+	protein_coding	0.727634	1.65592	0.0056284	0.0186738	3.54822	2.82058	5.2778	5.06052	4.95964	5.96516	8.29592	7.46679	7.12705	8.70271	9.67791	9.78487	15.8899	15.7095
ENSG00000116132.11_3	PRRX1	chr1:170631869-170708560	+	protein_coding	-1.21892	0.429605	1.69489e-06	2.27867e-05	0.240705	1.45962	1.22849	1.46457	1.64346	1.48574	2.32839	2.6035	0.156148	0.0341202	0.299098	0.140777	0.312908	0.169758
ENSG00000116157.5_2	GPX7	chr1:53068044-53074723	+	protein_coding	-1.77625	0.291942	8.10147e-07	1.25343e-05	1.31528	3.09152	7.29118	6.97912	5.72639	5.72093	10.081	10.574	1.71024	1.00384	1.20013	1.51924	1.58366	2.05352
ENSG00000116285.12_2	ERRFI1	chr1:8064464-8086368	-	protein_coding	-2.40517	0.188787	1.14643e-11	2.65155e-09	4.0582	6.46337	85.0009	79.7826	101.65	90.8451	81.8779	85.9634	16.4899	15.7069	15.5149	17.294	13.289	15.942
ENSG00000116489.12_2	CAPZA1	chr1:113161795-113214241	+	protein_coding	-0.680777	0.623829	0.0171808	0.0468711	5.92745	6.60823	115.967	107.544	65.3721	100.327	74.3848	132.965	49.3163	51.1199	52.6641	110.043	60.9606	51.4859
ENSG00000116525.13_2	TRIM62	chr1:33611003-33647660	-	protein_coding	-1.15641	0.448628	4.12679e-05	0.000311817	1.63248	2.78889	5.85159	6.6039	7.56211	8.1361	4.0491	4.2948	2.26977	2.32511	2.398	2.44924	1.37927	1.92979
ENSG00000116574.5_2	RHOU	chr1:228870824-228882416	+	protein_coding	3.10534	8.60596	1.0407e-11	2.49147e-09	3.28564	0.180304	0.174672	0.217235	0.236774	0.049554	0.032376	0.104684	8.24468	7.75364	8.98262	7.99532	8.39182	11.5999
ENSG00000116667.12_3	C1orf21	chr1:184356192-184598154	+	protein_coding	1.37714	2.59752	1.10186e-08	3.80657e-07	2.10371	0.726571	0.610057	0.663212	0.56084	0.679015	0.809943	0.616036	3.17379	2.59065	3.09667	3.37244	3.40741	4.32881
ENSG00000116675.15_2	DNAJC6	chr1:65713902-65881552	+	protein_coding	-0.722626	0.605993	3.15298e-05	0.000249858	0.568793	1.29142	1.18857	1.42274	2.19751	1.72392	1.06074	1.25964	0.561171	0.419657	0.55609	0.56847	0.415816	0.390566
ENSG00000116679.15_2	IVNS1ABP	chr1:185265520-185286461	-	protein_coding	-0.950984	0.517279	0.000541242	0.0025988	2.48764	3.43863	12.019	9.94993	13.3455	10.6321	7.93372	6.64523	5.38259	4.44842	4.84952	6.73344	3.86444	3.06763
ENSG00000116711.9_2	PLA2G4A	chr1:186798085-186958113	+	protein_coding	-1.4263	0.372084	7.10269e-05	0.000485587	0.0905522	1.51685	1.59152	1.11899	1.37506	1.04481	3.38637	3.69452	0.171375	0.146684	0.055298	0.028108	0	0
ENSG00000116729.13_3	WLS	chr1:68564156-68698803	-	protein_coding	-0.767486	0.58744	0.00104407	0.00454606	3.81246	4.57994	20.2269	25.3047	20.598	16.5685	30.9421	26.6545	12.4737	13.3689	11.8259	9.52008	15.8445	16.4785
ENSG00000116771.5_2	AGMAT	chr1:15898848-15911605	-	protein_coding	-1.03952	0.486489	2.11022e-08	6.55947e-07	0.539938	1.57946	2.01875	2.03612	1.51116	2.16497	2.04947	2.20754	0.425476	0.568075	0.331301	0.418035	0.586391	0.410995
ENSG00000116791.13_2	CRYZ	chr1:75171166-75199092	-	protein_coding	0.861063	1.81638	4.52083e-06	5.01963e-05	3.47951	2.61845	4.47336	5.5283	5.53195	5.21345	5.72078	4.50221	12.304	10.714	9.32795	10.6066	10.5844	7.89894
ENSG00000116793.15_3	PHTF1	chr1:114239453-114302111	-	protein_coding	-0.619028	0.65111	1.98163e-06	2.58577e-05	1.99551	2.61453	5.53715	4.8885	4.87196	4.49585	5.05664	6.01255	2.93877	3.21449	3.17306	3.23477	2.74374	2.66055
ENSG00000116815.15_4	CD58	chr1:117057157-117113661	-	protein_coding	0.877729	1.83748	7.35248e-07	1.1653e-05	4.43912	3.56139	11.5616	9.31592	10.4194	9.91561	13.0019	10.9696	20.3631	18.9832	21.5199	18.5725	21.614	23.4864
ENSG00000116833.13_2	NR5A2	chr1:199996730-200146552	+	protein_coding	-1.14073	0.45353	9.22018e-12	2.28761e-09	0.0822837	1.22301	1.33893	1.39822	1.11266	1.42615	1.33925	1.40574	0.0679044	0.100621	0.0474635	0.0539234	0.0313568	0.0521855
ENSG00000116885.18_2	OSCP1	chr1:36881428-36916052	-	protein_coding	-0.699359	0.615846	0.00495334	0.0167393	1.50269	2.20205	2.40486	3.31023	3.3423	2.62072	5.84228	5.01142	1.58257	1.7301	2.16514	1.25404	1.70665	2.80284
ENSG00000116991.10_2	SIPA1L2	chr1:232533711-232697304	-	protein_coding	-0.712143	0.610413	1.75803e-06	2.34737e-05	0.163137	0.87528	0.911643	0.98411	1.13203	0.815601	0.532529	0.693236	0.139102	0.151465	0.086752	0.166031	0.101138	0.0768584
ENSG00000117020.16_3	AKT3	chr1:243651535-244014381	-	protein_coding	0.688779	1.61192	0.00217841	0.00842828	3.91941	3.23063	10.1455	9.14154	10.0883	9.20836	5.86728	6.78554	16.3326	15.3991	16.3595	16.8413	10.8372	10.5149
ENSG00000117114.19_3	ADGRL2	chr1:81771845-82458120	+	protein_coding	-2.45511	0.182364	4.6476e-09	1.89884e-07	0.389776	2.84488	5.53077	7.48715	8.93386	5.43942	4.38371	6.20445	0.232595	0.387399	0.252689	0.292719	0.42907	0.278152
ENSG00000117122.13_4	MFAP2	chr1:17300997-17307330	-	protein_coding	2.44204	5.43408	3.54221e-09	1.56891e-07	3.1106	0.668563	0.354826	0.656377	0.494537	0.792364	0.543812	0.737701	6.97564	7.1401	6.29822	6.26374	9.91004	10.0587
ENSG00000117155.16_3	SSX2IP	chr1:85109390-85156486	-	protein_coding	-0.913867	0.530761	3.38716e-06	3.98115e-05	1.85323	2.7671	7.23439	6.59426	5.5793	5.27653	5.05069	5.36878	2.55263	2.4394	2.92064	3.17013	2.73446	1.98196
ENSG00000117226.11_3	GBP3	chr1:89472349-89488577	-	protein_coding	1.54738	2.92287	3.84391e-08	1.08826e-06	2.2615	0.714119	0.967118	0.63128	0.624973	0.75726	0.4718	0.445233	3.50295	3.64683	4.5716	3.30307	4.76725	3.20051
ENSG00000117228.9_2	GBP1	chr1:89518002-89531043	-	protein_coding	-1.61997	0.325343	7.3765e-08	1.83018e-06	1.97718	3.59715	12.9844	9.76424	11.2021	8.29584	12.9049	12.2306	2.52894	2.29845	3.26049	3.31728	3.12496	3.21793
ENSG00000117318.8_2	ID3	chr1:23884409-23886285	-	protein_coding	1.0349	2.04898	0.00047309	0.00233313	7.33239	6.29749	61.5526	67.9685	71.8453	80.5162	103.938	87.09	133.217	140.426	124.811	133.054	231.298	234.636
ENSG00000117394.20_2	SLC2A1	chr1:43391046-43424844	-	protein_coding	-0.84104	0.558241	5.63409e-05	0.000401267	4.02897	4.87001	26.1777	28.8199	26.0243	27.8131	30.3004	30.6591	12.2304	13.6693	13.8161	14.1506	18.0194	21.84
ENSG00000117461.14_3	PIK3R3	chr1:46505812-46598708	-	protein_coding	-1.08139	0.472574	1.61162e-06	2.19516e-05	2.1822	3.26359	7.18885	7.77668	8.67065	7.5579	10.0532	10.9333	3.12559	3.34913	3.81954	3.94565	4.14325	2.97272
ENSG00000117472.9_2	TSPAN1	chr1:46640745-46651630	+	protein_coding	-0.69723	0.616755	0.0042483	0.01471	0.894724	1.59195	1.51895	1.45549	1.58887	2.0707	2.96478	2.84973	0.758538	0.721564	0.385014	0.696556	1.8049	1.07022
ENSG00000117479.12_3	SLC19A2	chr1:169433147-169455241	-	protein_coding	-1.47807	0.358969	0.000210566	0.00118735	1.94306	3.42113	12.6094	12.354	5.5225	14.0631	4.81604	13.5467	2.64424	3.32524	2.77502	3.36605	2.44177	2.61497
ENSG00000117525.13_2	F3	chr1:94994781-95007356	-	protein_coding	-2.03606	0.243828	1.40803e-08	4.70456e-07	0.679622	2.71568	6.13163	7.05968	6.18872	5.40319	3.56525	5.65267	0.624876	0.582822	0.794214	0.6498	0.567849	0.414677
ENSG00000117528.11_2	ABCD3	chr1:94884011-94984222	+	protein_coding	-1.1197	0.46019	7.69784e-09	2.88584e-07	3.17231	4.292	19.6362	16.1901	20.0125	17.6895	18.2327	20.0914	8.59043	8.23631	8.24546	8.31884	7.98128	6.83048
ENSG00000117586.10_2	TNFSF4	chr1:173152873-173176452	-	protein_coding	0.926953	1.90126	4.02701e-05	0.000305802	1.08088	0.153929	0.182662	0.13515	0.166167	0.0804237	0.0839173	0.0345671	1.68008	1.05624	1.41386	1.44851	0.876261	0.466013
ENSG00000117594.9_3	HSD11B1	chr1:209859523-209908295	+	protein_coding	-3.01752	0.123492	6.77023e-09	2.60979e-07	0.114767	3.13228	7.21649	10.9925	6.15785	4.84477	9.13109	9.88082	0	0	0	0.160234	0.213918	0.144338
ENSG00000117595.10_3	IRF6	chr1:209958968-209979520	-	protein_coding	0.725897	1.65393	8.2708e-06	8.17258e-05	1.02114	0.295238	0.246955	0.255768	0.20851	0.190677	0.196322	0.266489	1.30009	1.19791	1.19453	1.10085	0.941481	0.544294
ENSG00000117602.11_2	RCAN3	chr1:24828841-24867530	+	protein_coding	2.14486	4.4225	1.93567e-06	2.53983e-05	3.04763	0.902766	0.395019	2.05804	1.30929	1.23968	0.690087	0.145409	7.32687	7.62762	7.6445	8.18301	6.74434	6.23577
ENSG00000117859.18_4	OSBPL9	chr1:52042851-52264099	+	protein_coding	0.682031	1.6044	1.88133e-06	2.48766e-05	3.82226	3.14023	8.21962	7.70017	8.25138	7.83508	6.93725	8.02588	16.0586	12.1183	12.804	13.3073	13.2908	11.6837
ENSG00000117877.10_3	CD3EAP	chr19:45909467-45914024	+	protein_coding	0.83002	1.77771	0.00979093	0.0296575	2.83311	2.00309	2.5451	2.57982	2.86744	4.41574	2.35346	3.65453	4.27943	10.3775	4.35617	7.92466	3.41775	9.32348
ENSG00000118257.16_3	NRP2	chr2:206546714-206662857	+	protein_coding	1.39034	2.62141	6.17475e-07	1.0067e-05	2.3308	0.940454	0.923003	1.0122	1.06063	1.00471	0.684241	0.855756	4.32811	4.36613	4.97128	5.1329	2.78863	3.08688
ENSG00000118263.14_3	KLF7	chr2:207938861-208031991	-	protein_coding	0.705123	1.63028	0.00180479	0.00719753	3.19896	2.49383	4.82096	6.02539	6.13631	5.21775	3.14522	3.2461	8.78297	8.3303	9.62092	9.13322	5.94398	7.79032
ENSG00000118276.11_2	B4GALT6	chr18:29202210-29265799	-	protein_coding	-0.606492	0.656792	0.000127625	0.000779224	0.362729	0.969221	1.34399	0.800199	0.782741	1.00506	0.663057	1.24485	0.432144	0.314101	0.3593	0.376565	0.133822	0.13209
ENSG00000118292.8_2	C1orf54	chr1:150240600-150253327	+	protein_coding	-1.64543	0.319651	5.03888e-06	5.47456e-05	0.46623	2.11166	2.70101	2.63012	2.52	2.39179	5.59315	5.16215	0.312837	0.37324	0.580488	0.389005	0.463444	0.200238
ENSG00000118418.14_3	HMGN3	chr6:79910962-79944455	-	protein_coding	-0.790722	0.578055	0.00353805	0.012593	5.12383	5.91455	68.6789	66.16	59.9365	57.8436	48.5497	56.931	38.0807	43.7298	46.8897	39.8878	21.9927	21.8333
ENSG00000118432.12_3	CNR1	chr6:88849583-88876078	-	protein_coding	2.10248	4.29448	4.03372e-09	1.70416e-07	2.33095	0.228464	0.129185	0.184418	0.228824	0.117423	0.233181	0.141937	4.91012	4.06602	4.62399	4.86584	3.43786	2.70082
ENSG00000118496.4_2	FBXO30	chr6:146114638-146135889	-	protein_coding	-0.594257	0.662385	0.00152181	0.00623062	1.68922	2.28347	4.19482	3.87839	3.95028	4.05226	3.42478	3.748	2.93555	2.49741	2.66582	2.76863	1.62248	1.25533
ENSG00000118507.15_3	AKAP7	chr6:131456806-131604675	+	protein_coding	-0.766498	0.587843	0.000281133	0.00151514	1.14036	1.90686	3.71335	3.56983	2.30708	2.51709	1.6109	3.25088	1.27304	1.02274	1.37924	1.12346	1.06089	1.39669
ENSG00000118515.11_3	SGK1	chr6:134490384-134639250	-	protein_coding	0.88233	1.84335	9.25611e-05	0.00059862	3.97162	3.08929	7.39907	7.50856	7.4386	7.9808	6.70248	8.10992	13.8185	12.1795	12.3157	13.2062	15.5514	23.3827
ENSG00000118523.5_2	CTGF	chr6:132269316-132272513	-	protein_coding	-0.977113	0.507995	7.12551e-07	1.13459e-05	9.22431	10.2014	1018.54	1230.89	1213	1368.99	1033.56	1231.9	637.704	660.677	592.736	616.205	495.635	594.318
ENSG00000118564.14_3	FBXL5	chr4:15606162-15683302	-	protein_coding	-1.21447	0.430933	9.72186e-07	1.45466e-05	3.70096	4.91543	26.0124	23.3917	28.2318	28.1798	35.7375	35.5843	11.0375	11.817	11.3353	10.6062	13.6341	13.965
ENSG00000118579.12_3	MED28	chr4:17616254-17635728	+	protein_coding	-0.683141	0.622808	2.32729e-06	2.96188e-05	2.08068	2.76382	5.41626	5.38712	5.52264	5.11795	7.05265	6.45431	3.28271	3.1368	2.98487	3.03029	3.3351	3.64465
ENSG00000118640.10_2	VAMP8	chr2:85788685-85809154	+	protein_coding	-4.45771	0.0455088	2.83558e-10	2.35941e-08	0.312428	4.77014	21.2384	23.3779	23.0292	20.9774	37.3937	36.5539	0.0938671	0.233039	0.302045	0.287351	0.621947	0
ENSG00000118689.14_2	FOXO3	chr6:108881038-109005977	+	protein_coding	-0.937717	0.522058	0.000548276	0.00262453	2.795	3.73271	13.8859	14.3302	14.7645	12.9929	8.46074	10.591	7.51648	7.38807	7.95284	4.07006	4.41218	5.36796
ENSG00000118777.10_3	ABCG2	chr4:89011416-89152474	-	protein_coding	-1.01348	0.495349	1.63252e-07	3.52281e-06	0.15341	1.16689	1.40098	1.59987	1.18677	0.803876	1.39122	1.17596	0.0475349	0.181584	0.0737298	0.0921861	0.115225	0.169228
ENSG00000118804.8_3	STBD1	chr4:77227179-77232752	+	protein_coding	-0.668612	0.629111	8.20043e-05	0.000546064	1.11418	1.78279	2.88016	3.07712	1.666	2.34481	2.31551	2.54863	1.23168	0.923583	1.10465	1.44369	0.967342	1.369
ENSG00000118849.9_2	RARRES1	chr3:158414681-158450485	-	protein_coding	-0.744727	0.596781	8.8001e-05	0.000576374	0.181496	0.926223	1.16428	0.671454	0.549154	0.700608	1.53629	0.948139	0.292875	0.104437	0.0883798	0.0732585	0.196901	0.0655518
ENSG00000118855.18_3	MFSD1	chr3:158449987-158547508	+	protein_coding	-0.634477	0.644174	0.000699588	0.00325599	3.30121	3.93569	15.6092	13.8079	16.8026	13.63	12.5332	13.8113	9.94669	10.4412	10.2528	10.2077	6.44992	6.79652
ENSG00000118898.15_3	PPL	chr16:4932508-5010742	-	protein_coding	-0.736667	0.600124	0.00356278	0.0126543	0.0750327	0.8117	1.21362	0.978982	1.28359	1.18157	0.170021	0.145377	0.0768849	0	0.118544	0.115513	0.0167767	0
ENSG00000118922.17_3	KLF12	chr13:74260226-74569193	-	protein_coding	-1.59202	0.331706	2.08418e-09	1.04561e-07	0.460054	2.05208	3.64672	3.41518	3.64369	3.05572	2.43557	2.83174	0.409794	0.360851	0.38243	0.525514	0.299794	0.288369
ENSG00000118965.14_3	WDR35	chr2:20110021-20189892	-	protein_coding	-0.62355	0.649072	9.17243e-05	0.000595183	1.77023	2.39378	4.77835	4.27635	4.52287	4.87692	3.06888	4.23203	2.56516	2.83747	2.51484	2.3648	2.44791	1.82365
ENSG00000119138.4_2	KLF9	chr9:72999513-73029540	-	protein_coding	-0.950562	0.517431	0.000151883	0.000904669	3.22546	4.17603	19.0051	18.7436	19.6323	18.452	11.8524	16.1235	10.003	9.43261	9.44438	9.8637	6.10023	6.23987
ENSG00000119185.12_2	ITGB1BP1	chr2:9543604-9563676	-	protein_coding	0.817436	1.76227	0.0004167	0.00209517	4.13835	3.32092	8.1814	7.84461	8.2433	8.73693	11.2712	10.1032	14.2298	14.6933	14.1261	13.5263	22.9333	22.7311
ENSG00000119280.16_2	C1orf198	chr1:230972865-231005335	-	protein_coding	1.38393	2.60978	3.82844e-07	6.81133e-06	4.24067	2.85674	6.2064	6.06418	7.14442	7.20425	5.05597	6.01324	13.687	16.136	18.195	17.8211	19.9773	22.932
ENSG00000119403.13_3	PHF19	chr9:123617930-123657174	-	protein_coding	0.623396	1.5405	0.000711763	0.00329718	4.53238	3.90899	13.1275	12.985	13.2647	12.8007	18.3927	14.2336	19.7667	20.51	18.3743	20.1391	28.0208	27.9246
ENSG00000119414.11_2	PPP6C	chr9:127908852-127952218	-	protein_coding	0.708578	1.63419	0.00230735	0.00886435	5.26057	4.55199	24.611	25.5001	15.3487	24.342	22.1538	24.5911	42.2135	42.239	43.3189	41.8446	23.2459	35.8901
ENSG00000119630.13_2	PGF	chr14:75408537-75422487	-	protein_coding	1.85709	3.62275	3.65511e-05	0.000281795	3.60285	1.74576	2.07164	2.49273	2.08884	2.40727	2.60451	2.49606	7.74705	7.98118	7.9693	8.99465	18.3473	22.6077
ENSG00000119632.3_2	IFI27L2	chr14:94594116-94596590	-	protein_coding	-0.75768	0.591447	0.00664882	0.0213834	3.97322	4.7309	24.041	23.1004	19.8684	18.9506	41.8695	31.5522	12.2153	14.2661	12.1955	11.6331	19.2464	21.042
ENSG00000119686.9_3	FLVCR2	chr14:76044960-76129557	+	protein_coding	-2.65948	0.158277	4.31588e-12	1.20193e-09	1.69883	4.35831	19.0589	18.8116	18.3039	19.5446	21.8901	19.638	2.16102	1.9551	2.24548	1.88468	2.52167	2.80068
ENSG00000119711.12_3	ALDH6A1	chr14:74523553-74551196	-	protein_coding	-0.867797	0.547983	5.83123e-08	1.50706e-06	1.44967	2.31746	4.04038	3.55494	4.47787	4.30424	4.37164	3.28027	1.86627	1.66409	1.74664	1.7486	1.6554	1.71301
ENSG00000119772.16_2	DNMT3A	chr2:25450724-25565459	-	protein_coding	-0.655011	0.635071	1.56843e-05	0.000139341	0.720077	1.37509	1.59061	1.70903	1.90686	1.76411	1.40528	1.2454	0.531498	0.819317	0.791328	0.816261	0.555878	0.416558
ENSG00000119782.13_3	FKBP1B	chr2:24272571-24286551	+	protein_coding	-0.912111	0.531407	0.00125487	0.00531203	2.07632	2.98843	5.7253	8.59658	4.35281	7.06866	6.70781	10.628	3.69556	2.89124	2.72956	2.16534	5.01881	3.33356
ENSG00000119899.12_2	SLC17A5	chr6:74303102-74363878	-	protein_coding	-0.671313	0.627935	2.22474e-08	6.83757e-07	3.86752	4.53884	21.3103	21.2634	22.8513	22.5208	22.0249	23.5864	14.4609	13.4238	13.2425	14.0659	12.146	14.3727
ENSG00000119917.13_2	IFIT3	chr10:91087651-91100728	+	protein_coding	-3.93034	0.065592	8.06435e-11	1.00042e-08	1.55453	5.48487	50.194	40.4113	39.3796	31.137	54.9819	51.3729	1.67154	1.79268	2.5918	1.84489	1.6767	2.14777
ENSG00000119922.9_3	IFIT2	chr10:91043451-91069033	+	protein_coding	-3.69147	0.0774026	1.69803e-11	3.46951e-09	0.454776	4.14625	19.5137	15.2346	17.0854	13.4341	17.1911	18.49	0.356781	0.261312	0.820088	0.317881	0.313154	0.229677
ENSG00000119929.12_3	CUTC	chr10:101462315-101515891	+	protein_coding	-0.631259	0.645613	3.9758e-06	4.53248e-05	3.19157	3.82283	12.9935	12.2379	12.2111	13.1111	15.6916	12.9307	7.85854	8.0991	7.92564	7.15815	9.43423	8.49505
ENSG00000119938.8_2	PPP1R3C	chr10:93388199-93392811	-	protein_coding	4.94684	30.8423	8.43769e-15	4.19153e-11	5.57757	0.630732	0.627156	0.536205	0.725222	0.55507	0.347124	0.525227	50.8736	49.2656	45.403	47.217	48.9371	39.7104
ENSG00000119950.20_4	MXI1	chr10:111967363-112047123	+	protein_coding	-0.714131	0.609572	0.0107335	0.0319385	1.06054	1.77467	4.06229	2.48383	4.26817	1.35601	1.94487	1.48925	1.28568	0.656202	1.65619	1.28328	0.947858	0.840864
ENSG00000120075.5_3	HOXB5	chr17:46668619-46671323	-	protein_coding	0.626929	1.54427	1.05569e-05	0.0001006	0.626929	0	0	0	0	0	0	0	0.680826	0.778089	0.60735	0.631096	0.37058	0.262918
ENSG00000120093.11_3	HOXB3	chr17:46626232-46682274	-	protein_coding	0.654745	1.57434	1.76735e-05	0.000154005	0.654745	0	0	0	0	0	0	0	0.630806	0.608776	0.829537	0.810359	0.28191	0.366868
ENSG00000120156.20_3	TEK	chr9:27109139-27230173	+	protein_coding	2.31736	4.98419	1.12728e-09	6.68819e-08	4.87861	2.56125	5.67338	5.49073	5.04685	4.9336	3.83389	4.62726	28.4283	30.1934	31.1824	34.3435	24.7897	23.0685
ENSG00000120256.9_2	LRP11	chr6:150139934-150185162	-	protein_coding	-0.691275	0.619306	0.00828031	0.025801	2.95842	3.6497	12.4067	11.9059	12.5071	11.1998	9.8645	11.6176	8.50693	8.09658	8.03694	10.0429	4.66822	3.50795
ENSG00000120279.6_3	MYCT1	chr6:153019030-153045702	+	protein_coding	1.64539	3.12833	3.23985e-07	5.95034e-06	3.72555	2.08016	3.39213	2.9421	3.26319	2.42539	3.95943	3.5589	12.0472	10.9127	10.7265	11.9026	18.554	10.6522
ENSG00000120337.8_2	TNFSF18	chr1:173009100-173020103	-	protein_coding	-1.75244	0.2968	9.37482e-06	9.09231e-05	1.42405	3.17648	8.31658	6.79897	6.4584	5.39536	11.6049	11.5012	1.99218	1.86736	2.29473	2.21169	0.865179	1.20466
ENSG00000120526.10_2	NUDCD1	chr8:110253148-110346614	-	protein_coding	-0.669079	0.628908	6.65902e-08	1.68306e-06	3.92978	4.59886	23.8429	23.5337	23.7915	20.8183	23.0215	24.5673	14.4818	13.935	15.3106	15.2025	13.6008	13.0426
ENSG00000120658.13_3	ENOX1	chr13:43787654-44361044	-	protein_coding	0.909886	1.8789	1.35532e-07	2.99938e-06	1.79636	0.886477	0.736971	0.903528	0.921904	0.943706	0.758496	0.837729	2.24812	2.26439	2.72142	3.07356	2.61167	2.02503
ENSG00000120659.14_2	TNFSF11	chr13:43136872-43182149	+	protein_coding	-1.20491	0.433798	1.67878e-09	9.01912e-08	0.161033	1.36594	1.42742	1.6491	1.80607	1.21933	1.68312	1.72851	0.0682334	0.0684023	0.0873541	0.186852	0.130332	0.17349
ENSG00000120675.5_2	DNAJC15	chr13:43597339-43688360	+	protein_coding	-0.874286	0.545524	6.69732e-06	6.88708e-05	3.82619	4.70048	24.5319	25.5039	22.6998	20.9584	27.677	29.594	12.8778	12.2273	11.8732	11.7742	16.5546	14.367
ENSG00000120708.16_3	TGFBI	chr5:135364584-135399507	+	protein_coding	1.66403	3.169	2.37397e-08	7.24724e-07	7.69495	6.03093	75.2026	72.4689	67.7146	68.1818	52.4633	53.9249	180.817	204.672	197.021	195.593	229.733	234.654
ENSG00000120738.7_2	EGR1	chr5:137801179-137805004	+	protein_coding	-2.58707	0.166424	3.84039e-05	0.000293591	1.34486	3.93193	19.9902	18.318	18.6496	23.1862	5.91945	8.47993	2.30224	2.38894	2.05578	2.06803	0.873116	0.366619
ENSG00000120756.12_3	PLS1	chr3:142315229-142432506	+	protein_coding	-1.31673	0.401443	1.18795e-08	4.05269e-07	1.21664	2.53337	5.28376	4.78016	5.20042	4.72111	4.33222	4.47966	1.17324	1.24289	1.64259	1.63281	1.37181	0.958945
ENSG00000120802.13_3	TMPO	chr12:98909290-98944157	+	protein_coding	-0.727161	0.604091	0.00177602	0.00710928	4.04544	4.7726	28.3909	28.8911	33.9253	25.2785	19.0235	24.831	19.5052	16.2908	18.1421	17.9138	12.6943	10.5294
ENSG00000120833.13_4	SOCS2	chr12:93963590-93977263	+	protein_coding	-0.841212	0.558174	6.01491e-05	0.000423745	0.645602	1.48681	2.2161	2.28726	1.3289	1.20669	2.01058	1.96312	0.735443	0.674249	0.388778	0.39417	0.389927	0.874574
ENSG00000120875.8_2	DUSP4	chr8:29190581-29208185	-	protein_coding	2.07448	4.21193	3.14363e-09	1.43471e-07	3.24262	1.16814	1.42502	1.32366	1.25523	1.34511	1.13004	1.02877	7.99925	7.27773	7.18198	7.67395	9.90133	11.4762
ENSG00000120937.8_2	NPPB	chr1:11917521-11918988	-	protein_coding	1.19511	2.28963	4.63769e-05	0.000341348	1.2209	0.0257909	0	0.113225	0	0	0	0	0.803419	1.17388	1.10466	0.820214	1.73765	2.90082
ENSG00000120992.17_2	LYPLA1	chr8:54958927-55014577	-	protein_coding	-0.869802	0.547222	0.000102669	0.000650429	4.06874	4.93854	31.9952	27.9076	22.2124	28.557	33.3755	35.966	16.6387	19.4811	18.0853	14.4436	15.6729	11.5776
ENSG00000121068.13_2	TBX2	chr17:59477257-59486827	+	protein_coding	-1.15371	0.449468	2.42813e-08	7.36316e-07	0.00686066	1.16057	1.31047	1.69561	1.05103	1.39831	0.88456	1.16151	0.0154653	0	0.0132731	0	0	0
ENSG00000121297.6_2	TSHZ3	chr19:31765851-31840453	-	protein_coding	-0.593567	0.662702	8.98321e-06	8.80639e-05	0.0279088	0.621476	0.636152	0.547856	0.811709	0.59776	0.287547	0.404688	0.0560747	0	0.0275137	0.0349658	0	0
ENSG00000121579.12_3	NAA50	chr3:113435307-113465147	-	protein_coding	-0.620689	0.65036	0.0234496	0.0607313	4.48959	5.11028	32.9664	47.3125	32.102	30.3339	25.489	36.6734	30.74	18.0566	28.4442	28.7587	15.6431	13.5714
ENSG00000121621.6_2	KIF18A	chr11:28042167-28129855	-	protein_coding	0.60039	1.51613	8.54459e-05	0.000563555	4.28197	3.68158	13.3794	11.9862	13.8226	12.0851	10.2789	9.92449	19.5602	17.3	19.5112	21.6562	16.6576	16.5557
ENSG00000121653.11_2	MAPK8IP1	chr11:45907202-45928016	+	protein_coding	0.727907	1.65623	0.000173721	0.00100662	1.36591	0.638	0.433205	0.692709	0.690201	0.464926	0.584261	0.492352	1.05195	1.44032	1.80858	1.12522	1.79783	2.50547
ENSG00000121690.10_3	DEPDC7	chr11:33037410-33055128	+	protein_coding	1.40614	2.65028	1.97709e-11	3.85419e-09	1.9927	0.586557	0.542572	0.479754	0.594114	0.375871	0.513076	0.513679	2.84576	3.00842	2.98961	3.41477	2.85533	2.79593
ENSG00000121769.7_3	FABP3	chr1:31838472-31849697	-	protein_coding	-1.936	0.26134	0.000103182	0.000652771	1.0265	2.9625	3.53698	4.24452	5.55428	6.80374	14.298	11.0469	0.884766	0.767215	1.81784	1.70442	0.687002	0.668752
ENSG00000121858.10_2	TNFSF10	chr3:172223298-172241297	-	protein_coding	-0.827602	0.563465	5.29227e-06	5.71348e-05	0.149523	0.977125	0.978218	0.871793	0.904615	0.586796	1.52083	1.06281	0.0267577	0.0804711	0.147315	0.0699627	0.149257	0.189916
ENSG00000121879.3_3	PIK3CA	chr3:178865902-178957881	+	protein_coding	-0.825661	0.564223	7.14668e-05	0.000487374	2.74963	3.57529	11.8297	11.5039	12.1797	10.4532	9.09124	10.7376	7.31359	5.95754	6.39471	6.68698	4.4644	4.15061
ENSG00000121895.7_3	TMEM156	chr4:38968365-39034542	-	protein_coding	-3.00464	0.124599	6.43929e-14	1.32816e-10	0.441705	3.44634	10.9301	9.62828	9.7316	9.37227	9.7198	10.0887	0.485289	0.274133	0.481021	0.329137	0.353825	0.244741
ENSG00000121900.18_2	TMEM54	chr1:33360195-33367039	-	protein_coding	1.39539	2.63059	0.000475759	0.00234291	4.51194	3.11656	5.91925	7.64782	5.86766	7.83643	11.5116	8.36902	16.0638	16.8684	18.2482	15.2355	35.56	39.4906
ENSG00000121966.6_2	CXCR4	chr2:136871919-136875735	-	protein_coding	0.597806	1.51341	0.00401821	0.0140273	0.622986	0.0251805	0.0289013	0.0350967	0	0	0.0426196	0	0.204436	0.268618	0.339312	0.695909	0.522194	1.52555
ENSG00000122035.6_2	RASL11A	chr13:27844464-27847827	+	protein_coding	-0.752875	0.59342	0.00157956	0.00641895	0.532818	1.28569	1.12581	1.83148	1.0248	1.58996	1.62588	1.53341	0.287263	0.627154	0.31701	0.497606	0	1.21965
ENSG00000122483.17_2	CCDC18	chr1:93645476-93744287	+	protein_coding	0.943796	1.92358	0.000495953	0.00242312	3.15271	2.20891	4.94345	3.07808	4.29823	5.38216	3.07222	1.92595	7.26874	6.86644	9.49527	9.2143	7.10737	7.75098
ENSG00000122512.14_2	PMS2	chr7:6012870-6048756	-	protein_coding	-0.693069	0.618537	0.000406884	0.0020549	2.07847	2.77154	6.55531	5.70345	6.89998	6.56832	4.71159	4.86088	2.84064	3.35028	4.47935	3.79661	2.90498	2.31045
ENSG00000122592.7_3	HOXA7	chr7:27193335-27197555	-	protein_coding	3.31469	9.94998	2.36877e-12	8.73629e-10	3.33139	0.0167003	0	0.0325918	0.0380901	0	0	0	8.83823	10.2588	11.5894	8.42984	7.95425	7.83383
ENSG00000122641.10_3	INHBA	chr7:41706766-41745432	-	protein_coding	1.69332	3.23401	4.80384e-08	1.30078e-06	4.18639	2.49307	4.23398	4.90826	4.84596	4.53441	3.94664	5.43292	18.0871	14.6558	19.2334	20.1943	12.7807	19.6257
ENSG00000122691.12_3	TWIST1	chr7:19060614-19157295	-	protein_coding	-1.45621	0.364449	2.44975e-06	3.09244e-05	0.365344	1.82155	1.36654	2.09858	2.73078	2.58423	3.38571	3.53465	0.411852	0.322148	0.391396	0.159805	0.126425	0.346694
ENSG00000122694.15_2	GLIPR2	chr9:36136533-36163910	+	protein_coding	2.17616	4.5195	1.11511e-06	1.64329e-05	6.1093	3.93314	15.5121	12.4136	12.8934	12.1307	17.7446	15.774	40.3859	69.918	57.3026	66.3956	91.1822	100.842
ENSG00000122705.16_2	CLTA	chr9:36190853-36304778	+	protein_coding	0.95257	1.93532	0.00410467	0.0142779	7.13174	6.17917	46.1065	77.0863	74.934	82.0818	117.326	51.7246	134.499	142.168	127.345	135.746	95.4803	230.573
ENSG00000122707.11_2	RECK	chr9:36036430-36124448	+	protein_coding	1.50433	2.83693	4.72711e-12	1.2405e-09	4.32243	2.81809	6.33701	5.6977	6.09764	6.39573	5.96643	5.84599	18.5241	19.0281	20.3581	20.0725	18.971	17.2468
ENSG00000122786.19_3	CALD1	chr7:134429003-134655479	+	protein_coding	0.8106	1.75394	0.0120026	0.0349898	5.7324	4.9218	38.4116	40.0115	24.8772	26.7526	22.2263	27.7695	63.0836	64.5633	65.3521	75.539	31.7811	31.2838
ENSG00000122862.4_2	SRGN	chr10:70847862-70864567	+	protein_coding	-0.830022	0.562521	0.000296138	0.00158101	9.5162	10.3462	1135.35	1160.62	1111.34	1097.6	1732.82	1738.74	724.828	676.604	638.62	669.252	803.43	907.898
ENSG00000122863.5_2	CHST3	chr10:73724123-73773322	+	protein_coding	0.845058	1.79634	0.000776341	0.00353609	2.3773	1.53225	2.21849	2.51443	2.52344	2.2155	0.950037	1.34286	4.95783	4.67719	4.92447	4.69724	2.99002	3.31844
ENSG00000122986.13_2	HVCN1	chr12:111065646-111142755	-	protein_coding	-0.689293	0.620158	3.87886e-06	4.44051e-05	0.120334	0.809627	0.926694	0.994492	0.696652	0.470039	0.608434	0.880887	0.0757619	0.0758648	0.172649	0.0998624	0.105007	0
ENSG00000123080.10_2	CDKN2C	chr1:51426417-51440305	+	protein_coding	-1.18815	0.438864	1.5414e-05	0.000137837	3.78465	4.97281	29.41	29.5834	29.4209	28.3563	34.488	31.533	11.8082	15.3045	15.3885	14.7813	7.5551	13.8271
ENSG00000123094.15_3	RASSF8	chr12:26111962-26232825	+	protein_coding	-1.20184	0.43472	0.00559402	0.0185913	2.217	3.41884	11.525	10.7672	10.9771	9.66306	6.96696	8.97837	2.44072	1.63005	8.36964	7.85754	1.89058	3.65222
ENSG00000123384.13_3	LRP1	chr12:57522276-57607134	+	protein_coding	1.06135	2.08688	0.00508893	0.0171212	1.37038	0.309033	0.341842	0.271015	0.379938	0.309754	0.0490252	0.118103	2.78646	2.26255	2.50186	2.66005	0.394278	0.352783
ENSG00000123572.16_3	NRK	chrX:105066536-105202602	+	protein_coding	-1.14338	0.452699	2.79921e-09	1.30815e-07	0.194849	1.33823	1.47333	1.3638	2.02393	1.4312	1.37043	1.56426	0.167795	0.0971188	0.12548	0.206248	0.168323	0.106561
ENSG00000123576.5_2	ESX1	chrX:103494719-103499614	-	protein_coding	4.65906	25.2648	1.07958e-12	5.30515e-10	4.76516	0.1061	0.225038	0.05151	0.125364	0.072458	0	0	21.2186	24.9314	29.1655	22.5505	33.8787	27.3215
ENSG00000123609.10_3	NMI	chr2:152126979-152146571	-	protein_coding	-1.56032	0.339076	4.52955e-08	1.24617e-06	2.20468	3.76499	14.2489	11.9637	11.8643	9.8154	14.2278	14.0738	3.43277	3.24957	3.91296	4.70637	3.30975	3.21565
ENSG00000123685.8_2	BATF3	chr1:212859760-212873327	-	protein_coding	-0.75187	0.593833	7.12702e-05	0.000486276	0.274866	1.02674	0.77695	0.704058	0.805725	1.15417	1.79242	1.17469	0.273335	0.10071	0.193204	0.163625	0.33174	0.210304
ENSG00000123689.5_2	G0S2	chr1:209848765-209849733	+	protein_coding	-6.21861	0.013428	1.70348e-11	3.46951e-09	1.32394	7.54254	190.429	202.798	160.042	167.256	207.187	189.817	0.84334	1.24215	1.58971	0.908566	1.8617	3.21127
ENSG00000123700.4_3	KCNJ2	chr17:68164814-68176189	+	protein_coding	-0.979053	0.507313	1.81826e-09	9.54201e-08	0	0.979053	0.872261	0.959181	0.855154	0.815266	1.16343	1.19504	0	0	0	0	0	0
ENSG00000123892.11_3	RAB38	chr11:87846410-87908635	-	protein_coding	-1.42262	0.373035	2.29204e-06	2.92584e-05	0.742804	2.16542	3.68148	3.69721	3.15905	1.88058	4.50552	4.61885	0.541305	0.689885	0.67643	0.610688	0.839993	0.696992
ENSG00000123933.16_3	MXD4	chr4:2249159-2264021	-	protein_coding	-1.39162	0.381138	1.22762e-06	1.77647e-05	2.57058	3.96219	11.2746	13.4229	13.4736	15.3245	19.1826	15.9816	4.51443	4.63896	4.10904	4.36197	5.81742	6.56728
ENSG00000123977.9_4	DAW1	chr2:228735770-228789060	+	protein_coding	-0.720234	0.606999	1.33575e-06	1.89674e-05	0.613287	1.33352	1.68605	1.46926	1.43317	1.08863	1.69143	1.82409	0.592956	0.596983	0.410081	0.457173	0.552562	0.579058
ENSG00000123983.13_2	ACSL3	chr2:223725652-223809357	+	protein_coding	-0.897127	0.536955	2.7978e-06	3.42411e-05	3.73995	4.63708	25.8846	20.0222	24.3189	22.3386	25.0075	26.327	13.0749	11.8686	13.9556	14.4153	11.4319	9.95854
ENSG00000124126.13_3	PREX1	chr20:47240790-47444420	-	protein_coding	0.749426	1.68112	0.000351551	0.00181577	3.13961	2.39019	5.34747	4.91326	4.42208	4.06481	3.29697	3.68585	8.62837	8.6797	9.1425	9.27058	6.46739	5.46222
ENSG00000124145.6_3	SDC4	chr20:43953928-43977064	-	protein_coding	-0.739739	0.598848	2.45328e-06	3.09403e-05	6.18726	6.927	109.568	117.699	106.134	122	131.853	140.298	70.0683	76.9679	75.7202	72.3798	62.0832	75.0891
ENSG00000124191.17_2	TOX2	chr20:42543504-42698256	+	protein_coding	-2.56786	0.168654	6.57778e-09	2.54279e-07	0.237655	2.80552	7.64292	6.33844	7.40867	7.12028	4.42972	3.96516	0.244159	0.245591	0.211603	0.126383	0.0980047	0.157034
ENSG00000124212.5_2	PTGIS	chr20:48120411-48184683	-	protein_coding	-0.727573	0.603919	2.53593e-06	3.18151e-05	0.184784	0.912357	1.10969	0.968509	0.972817	1.01852	0.546084	0.738485	0.12202	0.14199	0.141239	0.265671	0.066545	0.092482
ENSG00000124216.3_2	SNAI1	chr20:48599536-48605423	+	protein_coding	2.27572	4.84239	2.46236e-10	2.12667e-08	4.12059	1.84487	1.95354	3.06996	2.69938	3.10239	2.21861	2.6593	15.9405	18	15.0858	15.2687	18.6383	15.7473
ENSG00000124225.15_3	PMEPA1	chr20:56223448-56286592	-	protein_coding	0.787158	1.72567	6.13927e-05	0.000430982	1.38206	0.594906	0.488571	0.803404	0.543568	0.471867	0.289132	0.509916	2.16529	1.81799	1.59808	1.99436	1.07077	1.1818
ENSG00000124357.12_2	NAGK	chr2:71291474-71306935	+	protein_coding	0.605848	1.52187	0.000661937	0.00309872	2.542	1.93615	2.69878	2.27715	2.72439	2.77238	3.552	3.05144	3.95373	4.17407	3.98687	4.83856	5.82795	6.65807
ENSG00000124380.10_3	SNRNP27	chr2:70120692-70132707	+	protein_coding	0.636258	1.55429	6.31236e-07	1.02546e-05	4.84295	4.2067	17.3529	17.2312	17.3802	16.0062	18.1948	18.7419	26.1768	25.1712	29.8494	25.7795	31.0532	28.6693
ENSG00000124383.8_2	MPHOSPH10	chr2:71357444-71377231	+	protein_coding	0.75048	1.68235	0.000159848	0.000942239	4.29633	3.54585	13.4889	9.71216	12.3324	10.6666	9.53923	8.9739	17.2469	21.6	21.1492	20.131	13.7061	19.2707
ENSG00000124440.15_2	HIF3A	chr19:46800303-46846690	+	protein_coding	-1.06646	0.477488	0.00325368	0.0117584	0.845964	1.91243	3.92733	3.88723	5.97234	2.26524	1.01628	1.57436	0.955069	0.694335	0.841312	0.99164	0.724977	0.609459
ENSG00000124523.15_3	SIRT5	chr6:13574761-13615390	+	protein_coding	-0.627483	0.647305	1.05474e-07	2.44363e-06	0.808449	1.43593	1.66788	1.47568	1.92174	1.57932	1.7657	1.84932	0.821919	0.866125	0.751546	0.618212	0.712883	0.748037
ENSG00000124575.6_2	HIST1H1D	chr6:26234496-26235161	-	protein_coding	-0.948352	0.518224	0.00374699	0.013185	1.37702	2.32538	2.50853	3.33349	3.86142	2.75853	9.67881	4.34295	1.48897	2.1024	1.56524	1.39088	1.11358	2.06713
ENSG00000124635.8_2	HIST1H2BJ	chr6:27093676-27100529	-	protein_coding	1.46335	2.75747	6.43787e-05	0.000447482	2.95185	1.4885	1.84154	1.65918	1.06424	1.11031	4.11072	1.90142	6.27972	5.09392	5.5821	7.02152	8.75505	8.39089
ENSG00000124762.13_2	CDKN1A	chr6:36644237-36655116	+	protein_coding	1.48554	2.80022	1.64e-06	2.22239e-05	5.93696	4.45142	20.839	22.7041	24.5719	24.3729	12.8689	22.5416	55.1611	57.0584	53.5495	61.0274	69.2514	67.2173
ENSG00000124875.9_3	CXCL6	chr4:74702214-74714781	+	protein_coding	-3.00741	0.12436	8.34989e-09	3.06297e-07	0.457547	3.46495	12.8995	13.2881	10.7243	6.36046	8.46323	10.1769	0.603541	0.445937	0.401283	0.566657	0.23389	0.0675938
ENSG00000124882.3_2	EREG	chr4:75230860-75254468	+	protein_coding	-1.00441	0.498474	2.63122e-06	3.27606e-05	0.0408118	1.04522	1.16442	0.984211	0.621507	0.769367	1.47802	1.52982	0.016364	0.0490493	0.0277617	0.0284613	0	0.0514481
ENSG00000125089.16_3	SH3TC1	chr4:8183799-8243530	+	protein_coding	-0.628658	0.646778	1.33596e-05	0.000121536	1.20278	1.83144	2.42657	2.37591	2.95835	2.85391	2.75763	2.06427	0.943281	1.36592	1.22958	1.32542	1.46009	1.53646
ENSG00000125144.13_4	MT1G	chr16:56700643-56701977	-	protein_coding	0.840306	1.79043	2.32701e-05	0.000194335	0.919123	0.0788174	0.101006	0	0.124113	0	0	0.121395	0.84405	1.06991	0.636283	0.653042	1.62348	0.687943
ENSG00000125166.12_2	GOT2	chr16:58741035-58768261	-	protein_coding	-0.594017	0.662496	0.000178871	0.00103208	5.525	6.11902	62.4282	65.8137	61.3249	63.4648	80.6249	80.1135	44.19	45.6979	39.1355	39.2851	51.9116	51.7937
ENSG00000125257.13_2	ABCC4	chr13:95672083-95953700	-	protein_coding	-0.949879	0.517676	1.14644e-09	6.70989e-08	3.17604	4.12592	16.2785	16.2397	16.044	15.8552	16.8794	17.5121	8.25642	7.20619	7.77349	8.03658	9.0712	7.98787
ENSG00000125266.6_3	EFNB2	chr13:107142079-107187462	-	protein_coding	1.50055	2.82951	2.76533e-07	5.29252e-06	3.34636	1.8458	2.52819	2.6605	3.1984	2.53057	2.06875	2.67172	10.0042	10.0552	10.7581	10.9847	7.01549	7.05567
ENSG00000125354.22_2	SEPT6	chrX:118749687-118827333	-	protein_coding	1.12788	2.18537	1.34669e-06	1.90434e-05	3.3683	2.24042	4.62368	3.82768	4.24814	3.37272	3.03593	3.42732	8.57299	10.252	11.0234	10.8391	8.0157	7.77264
ENSG00000125378.15_3	BMP4	chr14:54416454-54425479	-	protein_coding	-0.729507	0.60311	0.00207527	0.00808425	1.51593	2.24543	2.1882	4.06819	4.10028	4.91672	4.58837	3.17154	1.1328	1.69463	2.08956	1.72091	1.91564	2.88364
ENSG00000125398.5_2	SOX9	chr17:70117161-70122561	+	protein_coding	1.21308	2.31831	0.00290492	0.0107021	1.99783	0.784756	0.882134	0.627628	1.15166	0.931471	0.276128	0.609342	3.93071	3.78204	5.02524	5.15911	1.39024	0.940839
ENSG00000125434.10_2	SLC25A35	chr17:8191081-8198661	-	protein_coding	-0.643461	0.640176	0.000310364	0.00164284	1.1649	1.80836	2.62528	2.51494	3.14422	3.27368	1.69843	2.03116	1.19027	1.11525	1.58507	1.36568	0.944159	1.30674
ENSG00000125534.9_2	PPDPF	chr20:62152077-62153559	+	protein_coding	-0.753477	0.593172	4.72879e-06	5.2208e-05	6.75754	7.51102	167.327	180.341	180.864	220.388	176.196	168.138	98.8434	123.781	111.14	91.733	109.591	110.983
ENSG00000125618.16_2	PAX8	chr2:113973574-114036527	-	protein_coding	0.658526	1.57847	4.71778e-09	1.92176e-07	0.683298	0.0247712	0.027385	0.0502033	0.0126634	0.014541	0	0	0.46558	0.586817	0.596504	0.583641	0.684966	0.730629
ENSG00000125657.4_2	TNFSF9	chr19:6531010-6535939	+	protein_coding	0.701972	1.62673	0.000625197	0.00295001	1.66188	0.959911	0.67604	0.57396	0.712155	0.902812	1.40955	1.61589	2.27897	2.80076	2.1452	1.5715	2.21806	2.09475
ENSG00000125703.14_2	ATG4C	chr1:63249806-63331184	+	protein_coding	-0.672293	0.627509	3.50532e-05	0.000273335	2.22392	2.89621	6.7819	5.28756	7.45168	6.37617	6.53925	6.40293	3.59	3.835	4.49069	4.21495	3.20388	2.89094
ENSG00000125726.10_3	CD70	chr19:6583194-6604114	-	protein_coding	1.92223	3.79008	4.37631e-10	3.17655e-08	2.24932	0.327089	0.331032	0.196104	0.182281	0.141415	0.467331	0.236323	4.33183	3.86299	4.319	3.66914	3.22404	3.24715
ENSG00000125730.16_3	C3	chr19:6677715-6730573	-	protein_coding	-0.978168	0.507624	0.000156686	0.000928415	0.178945	1.15711	1.13194	1.19779	2.37562	1.7405	0.73852	0.632403	0.0269385	0.0820202	0.252803	0.135719	0.123657	0.184784
ENSG00000125875.13_2	TBC1D20	chr20:416124-443197	-	protein_coding	0.707135	1.63256	0.00271997	0.0101606	3.05967	2.35254	3.20436	4.9667	5.18249	5.32715	3.60289	2.92888	6.52395	7.65532	8.5481	5.16296	6.58488	10.5594
ENSG00000125878.6_3	TCF15	chr20:584441-591042	-	protein_coding	2.00719	4.01997	2.12153e-06	2.73892e-05	2.03311	0.025923	0.113837	0	0	0	0	0	2.1516	2.1692	2.71448	2.38863	3.84808	6.71233
ENSG00000125965.8_2	GDF5	chr20:34021145-34042568	-	protein_coding	-2.10175	0.232976	2.60003e-12	9.09744e-10	0.0410693	2.14282	3.43462	3.21352	2.87763	3.54013	3.77903	3.71884	0.0704768	0	0	0	0	0.108157
ENSG00000126012.11_3	KDM5C	chrX:53220503-53254604	-	protein_coding	-0.713104	0.610006	0.00213607	0.00829269	2.57765	3.29076	10.0418	9.7222	11.0574	10.2055	6.10298	6.73123	4.88841	5.13349	5.57857	6.87892	4.55538	3.35195
ENSG00000126214.21_3	KLC1	chr14:104028233-104180586	+	protein_coding	1.05405	2.07635	1.44586e-06	2.01486e-05	2.85326	1.79921	3.11969	2.78492	2.70315	2.69724	1.71265	2.06854	6.49575	6.30461	7.06612	6.49772	5.77639	5.34587
ENSG00000126226.21_3	PCID2	chr13:113831853-113863029	-	protein_coding	-0.689406	0.620109	1.06833e-05	0.000101451	2.96181	3.65122	11.5028	10.6333	11.5682	10.612	13.5444	11.74	6.12907	6.19618	5.72947	7.93468	7.67786	7.35515
ENSG00000126368.5_2	NR1D1	chr17:38249040-38256978	-	protein_coding	0.707676	1.63317	0.000473562	0.00233377	1.68628	0.978608	1.15737	1.33761	1.35704	0.914557	0.566027	0.642903	2.40597	2.63715	2.68779	2.47985	1.74234	1.5485
ENSG00000126562.16_2	WNK4	chr17:40932696-40948954	+	protein_coding	1.08391	2.11978	0.00549083	0.0183198	2.58432	1.5004	2.60639	2.57761	2.87965	2.61656	0.6111	0.758415	5.50526	6.2187	6.69878	7.06949	3.45014	2.58405
ENSG00000126653.17_3	NSRP1	chr17:28442539-28513493	+	protein_coding	0.99692	1.99573	0.0389155	0.0914011	3.81126	2.81434	4.02699	6.00266	13.7934	13.6865	3.25776	2.71942	21.5512	7.2613	17.0929	13.0886	14.5579	9.35823
ENSG00000126709.14_2	IFI6	chr1:27992572-27998729	-	protein_coding	-3.11709	0.115256	1.52496e-05	0.000136815	4.05736	7.17444	123.08	137.987	63.2027	85.92	361.97	259.085	12.3506	11.8836	19.2549	16.0311	17.8458	18.0456
ENSG00000126778.8_2	SIX1	chr14:61110133-61124977	-	protein_coding	-2.97782	0.126937	3.15518e-10	2.47891e-08	1.8274	4.80521	29.0073	27.8659	28.3781	28.0663	22.358	26.6452	2.90058	3.24171	3.08853	2.67752	1.63564	2.04741
ENSG00000126785.12_2	RHOJ	chr14:63670832-63759937	+	protein_coding	3.01203	8.06696	5.8106e-10	3.94485e-08	3.3687	0.356678	0.168876	0.297125	0.419903	0.172679	0.228823	0.420847	10.8315	9.66518	10.7222	11.2103	8.46488	6.10597
ENSG00000126860.11_3	EVI2A	chr17:29644578-29648902	-	protein_coding	-1.12629	0.458093	1.01674e-05	9.7501e-05	0.245222	1.37151	1.30448	1.1356	1.48958	1.1223	2.64403	2.16656	0.173462	0.180081	0.162982	0.335892	0.0626796	0.212797
ENSG00000126878.12_2	AIF1L	chr9:133971863-133998539	+	protein_coding	0.90853	1.87713	0.0048581	0.0164827	1.97612	1.06759	1.00458	0.694196	1.61686	0.750882	1.48158	1.19537	2.72123	3.34278	2.0793	1.16038	4.56839	5.19534
ENSG00000126882.12_2	FAM78A	chr9:134133463-134151934	-	protein_coding	-0.830695	0.562258	3.06474e-06	3.67177e-05	0.033185	0.86388	1.0378	1.24767	0.808662	0.824663	0.492862	0.610161	0	0.0509943	0.0505706	0.0397105	0	0
ENSG00000126950.7_3	TMEM35A	chrX:100333709-100351353	+	protein_coding	-1.85712	0.276026	3.12291e-07	5.80282e-06	0.382706	2.23983	3.20911	4.05841	2.54217	3.14243	4.56615	5.38632	0.38025	0.508864	0.27069	0.484327	0.250429	0
ENSG00000126970.15_2	ZC4H2	chrX:64135682-64254593	-	protein_coding	1.09244	2.13234	9.92246e-08	2.3225e-06	1.12113	0.0286974	0.0146937	0.0151899	0.0542246	0	0.0183234	0.0189	0.957467	1.08345	1.2381	0.914823	1.79846	1.16554
ENSG00000127083.7_2	OMD	chr9:95176527-95186743	-	protein_coding	-1.91904	0.264431	2.09584e-10	1.88157e-08	0.137342	2.05638	3.38918	3.07158	3.4387	2.5345	2.91145	3.72194	0.094864	0.114119	0.097702	0.255621	0.053005	0
ENSG00000127220.5_3	ABHD8	chr19:17402940-17421045	-	protein_coding	-0.671669	0.62778	1.88453e-05	0.000162677	2.01707	2.68874	4.75427	5.32319	5.88924	6.81709	5.05626	5.05333	2.61298	2.84465	2.91757	2.8429	3.60541	3.56585
ENSG00000127328.21_3	RAB3IP	chr12:70132461-70216984	+	protein_coding	-0.679849	0.624231	1.53947e-10	1.50054e-08	0.263991	0.943839	0.959776	0.900955	0.973146	0.911511	0.937779	0.86091	0.185428	0.145997	0.18348	0.176767	0.258802	0.258771
ENSG00000127329.15_4	PTPRB	chr12:70909646-71031220	-	protein_coding	0.919981	1.89209	5.59335e-08	1.45384e-06	1.17511	0.255127	0.238824	0.242979	0.135771	0.147062	0.19576	0.204509	1.49173	1.38298	1.38174	1.36976	0.917741	1.06276
ENSG00000127334.10_3	DYRK2	chr12:68042118-68059186	+	protein_coding	0.749371	1.68106	1.91829e-05	0.00016505	1.9081	1.15872	1.34739	1.1827	1.30233	1.20004	1.00636	1.37836	3.16258	2.7083	3.32128	3.16045	1.84259	2.5429
ENSG00000127337.6_2	YEATS4	chr12:69753483-69784576	+	protein_coding	-0.599546	0.659962	0.000103485	0.000654076	4.28738	4.88692	28.7018	26.5992	25.383	24.9552	32.9241	34.2313	19.0483	20.1575	19.6864	18.7876	14.9882	18.9689
ENSG00000127419.16_3	TMEM175	chr4:926175-952444	+	protein_coding	-0.607157	0.656489	7.27945e-06	7.42284e-05	0.98489	1.59205	1.93223	1.85166	2.19755	2.30464	1.91492	1.91515	0.825627	0.745426	0.857378	1.22153	1.24543	1.03574
ENSG00000127528.5_2	KLF2	chr19:16435628-16438685	+	protein_coding	1.25206	2.38182	1.74314e-07	3.68321e-06	5.46392	4.21186	16.3504	20.1386	19.9759	17.2886	18.8249	13.5171	44.9464	49.738	42.6346	39.6985	43.9756	38.706
ENSG00000127561.14_2	SYNGR3	chr16:2039661-2044276	+	protein_coding	0.989256	1.98516	3.67808e-05	0.000283086	1.13986	0.150603	0.0530375	0.122846	0.216007	0.177924	0.0618047	0.0402901	1.09976	1.52019	0.810199	1.86107	1.63161	0.5875
ENSG00000127585.11_2	FBXL16	chr16:742498-755829	-	protein_coding	0.633444	1.55126	1.71778e-08	5.55468e-07	0.652353	0.0189091	0.0370866	0.0196992	0	0	0	0.0229777	0.497586	0.666999	0.561382	0.714798	0.565114	0.441025
ENSG00000127824.13_3	TUBA4A	chr2:220114433-220142892	-	protein_coding	-1.73986	0.299399	1.97918e-09	1.00776e-07	1.17993	2.91979	5.56807	5.73686	6.40212	7.56173	7.80546	6.60512	1.19095	1.57285	1.08293	1.1549	1.45614	1.17655
ENSG00000127838.13_2	PNKD	chr2:219135115-219211516	+	protein_coding	-0.721091	0.606639	0.000509246	0.00247566	2.47425	3.19534	7.43887	7.1845	8.92904	8.33267	8.94897	8.27665	3.33417	4.10939	3.64466	4.30049	6.07669	6.63068
ENSG00000127863.15_3	TNFRSF19	chr13:24144509-24250243	+	protein_coding	0.749273	1.68095	1.87337e-05	0.0001619	1.15118	0.401903	0.188468	0.230525	0.255366	0.274289	0.479213	0.537313	1.01682	0.905621	1.19021	1.18308	1.36385	1.76281
ENSG00000127946.16_3	HIP1	chr7:75162621-75368280	-	protein_coding	-0.746981	0.595849	0.0189546	0.0509964	2.18742	2.9344	8.37881	8.53719	8.99099	7.05861	3.96463	4.58119	4.91166	4.25821	4.45336	4.83018	2.52982	1.55989
ENSG00000127955.15_2	GNAI1	chr7:79763271-79848718	+	protein_coding	-1.13904	0.45406	1.11708e-07	2.55339e-06	2.80503	3.94407	15.8885	15.3052	14.4694	14.8529	12.2321	13.8788	6.63356	6.62849	6.20536	6.51102	5.49678	4.69064
ENSG00000127990.15_2	SGCE	chr7:94214542-94285521	-	protein_coding	-0.601694	0.65898	0.000146479	0.000876691	2.38054	2.98224	6.85281	6.87626	6.44251	7.44235	6.58079	7.26446	3.1614	3.38606	4.83573	4.1677	4.81736	5.22667
ENSG00000128052.8_2	KDR	chr4:55944644-55991756	-	protein_coding	0.986513	1.98139	6.0589e-05	0.000426624	2.51483	1.52831	2.18701	2.08534	2.05059	1.80097	1.43636	1.8138	5.6821	5.92476	5.50822	5.46404	3.26206	3.20076
ENSG00000128165.8_2	ADM2	chr22:50919985-50924869	+	protein_coding	0.885869	1.84788	0.00107039	0.00463849	1.11233	0.226464	0.130038	0.210841	0.271091	0.252149	0.05394	0.117394	1.14053	1.38366	1.70248	2.18766	0.269778	0.829552
ENSG00000128272.14_2	ATF4	chr22:39915700-39918690	+	protein_coding	0.865921	1.8225	0.000133911	0.000812156	7.16136	6.29544	71.7778	82.3866	87.2423	90.4801	65.589	70.9771	112.353	128.077	128.819	133.544	165.748	200.91
ENSG00000128283.6_4	CDC42EP1	chr22:37956454-37965412	+	protein_coding	0.811003	1.75443	0.000167082	0.000975195	5.7681	4.9571	27.8793	37.151	30.6603	40.4451	22.271	25.7007	45.1158	53.6614	52.2564	54.9777	58.1309	57.9527
ENSG00000128284.19_3	APOL3	chr22:36536378-36562225	-	protein_coding	-1.01036	0.496421	3.35504e-05	0.000262969	1.21831	2.22867	4.69695	4.59836	3.4667	2.93891	4.28421	2.57545	1.14229	1.19438	2.00856	1.33346	1.42262	0.984468
ENSG00000128294.15_2	TPST2	chr22:26917949-26992681	-	protein_coding	0.632922	1.5507	9.13939e-05	0.000593886	2.8125	2.17958	3.7871	3.66836	3.05728	3.12602	3.44837	4.19411	5.04945	5.09274	5.4675	6.77345	7.48557	6.64411
ENSG00000128335.13_3	APOL2	chr22:36622249-36636000	-	protein_coding	-0.735753	0.600504	3.13977e-06	3.74194e-05	2.94953	3.68529	10.2871	12.9549	13.2544	11.6226	10.6701	12.7029	5.9073	6.19683	7.36811	7.68222	6.30268	7.05749
ENSG00000128342.4_2	LIF	chr22:30636436-30642840	-	protein_coding	-0.776161	0.583919	3.56806e-06	4.15442e-05	0.813203	1.58936	2.25132	1.70547	2.37646	2.34144	1.9251	1.55765	0.731873	0.69714	0.975254	0.829971	0.538773	0.80018
ENSG00000128394.16_2	APOBEC3F	chr22:39436609-39449915	+	protein_coding	-0.920013	0.528504	2.81829e-07	5.37292e-06	0.563785	1.4838	1.80614	1.78598	2.09468	2.0814	1.40438	1.67026	0.323289	0.581328	0.686838	0.45019	0.37911	0.477489
ENSG00000128408.8_2	RIBC2	chr22:45809572-45828376	+	protein_coding	-1.03305	0.488675	0.000114728	0.000710658	0.530151	1.5632	2.0364	2.36099	2.5104	2.40697	1.55922	1.13191	0.402121	0.582579	0.866711	0.396724	0	0.567506
ENSG00000128422.15_2	KRT17	chr17:39775689-39781094	-	protein_coding	-0.644517	0.639707	6.44039e-05	0.000447482	0.197381	0.841898	0.634499	0.691839	0.688555	1.2713	0.940887	0.610963	0.285045	0.0394812	0.0313324	0.217304	0.0762379	0.25911
ENSG00000128487.16_3	SPECC1	chr17:19912657-20222339	+	protein_coding	-0.994528	0.5019	3.53281e-09	1.56891e-07	0.20521	1.19974	1.72361	1.31661	1.14449	1.22043	1.2605	1.16261	0.171403	0.141445	0.155048	0.163856	0.139402	0.146329
ENSG00000128510.10_2	CPA4	chr7:129932974-129964020	+	protein_coding	1.65865	3.15722	4.7122e-10	3.33175e-08	3.7405	2.08185	3.39712	2.98562	3.21094	3.03566	3.19291	3.61018	11.3646	11.1046	10.9181	13.445	13.9411	13.8109
ENSG00000128567.16_2	PODXL	chr7:131185021-131242976	-	protein_coding	2.47759	5.56968	5.28786e-05	0.000380983	6.58018	4.10259	23.4047	23.4868	21.4634	17.6242	7.31702	11.3621	121.281	122.519	127.35	135.318	55.9513	49.9863
ENSG00000128595.16_3	CALU	chr7:128379346-128411861	+	protein_coding	0.643651	1.56228	9.04349e-05	0.000588776	6.30351	5.65986	54.9033	52.0871	53.3446	42.9041	46.8585	48.2803	82.0739	80.2814	83.0165	89.4106	79.0995	58.102
ENSG00000128606.12_3	LRRC17	chr7:102553438-102585396	+	protein_coding	-1.17238	0.443689	8.18978e-05	0.000545912	0.798268	1.97065	2.41081	2.71518	1.9435	2.28924	5.05219	3.88244	0.850295	0.49581	1.07956	1.0096	0.659725	0.440721
ENSG00000128645.14_3	HOXD1	chr2:177053307-177055635	+	protein_coding	1.1942	2.28818	1.07942e-07	2.49235e-06	1.22159	0.0273835	0	0	0	0	0.047993	0.069304	1.12405	0.90761	1.2242	1.3898	1.55639	1.92135
ENSG00000128652.11_3	HOXD3	chr2:177001340-177037830	+	protein_coding	0.598712	1.51436	1.92804e-06	2.53234e-05	0.650737	0.0520246	0.0304303	0	0	0.0608588	0.0801461	0.0514949	0.380749	0.706994	0.559897	0.438603	0.792931	0.579069
ENSG00000128656.13_3	CHN1	chr2:175664091-175870097	-	protein_coding	0.680272	1.60244	1.19134e-06	1.73686e-05	1.55619	0.87592	1.06037	0.845275	0.864363	0.749389	0.821025	0.691728	1.91278	1.9319	1.85529	2.45205	1.93251	1.62024
ENSG00000128709.12_3	HOXD9	chr2:176987448-176989665	+	protein_coding	3.15687	8.91895	1.23176e-10	1.3095e-08	3.16677	0.00989739	0	0.042021	0	0	0	0	6.7753	8.2067	7.62172	5.83047	10.8556	9.49466
ENSG00000128710.5_3	HOXD10	chr2:176973518-176984670	+	protein_coding	1.41952	2.67496	7.38285e-11	9.32837e-09	1.42626	0.00673949	0.0284253	0	0	0	0	0	1.67296	1.53756	1.48891	1.59872	1.72473	2.15191
ENSG00000128739.21_3	SNRPN	chr15:25068784-25223870	+	protein_coding	1.00681	2.00946	0.000103807	0.000655202	3.6883	2.68149	5.02824	6.12901	5.59881	4.88985	5.62447	5.29949	7.23402	12.279	11.616	10.7617	16.7376	14.9464
ENSG00000128833.12_2	MYO5C	chr15:52484519-52587995	-	protein_coding	-0.749822	0.594677	1.07255e-05	0.00010178	0.0814791	0.831301	0.851541	0.698519	1.09029	1.1392	0.48928	0.515102	0.100754	0.0651062	0.0320336	0.0684817	0.0375213	0.0462237
ENSG00000128891.15_3	CCDC32	chr15:40820882-40857256	-	protein_coding	0.698117	1.62239	0.000188834	0.00108255	1.96585	1.26773	1.18036	1.07505	1.67294	1.10886	2.20187	1.38646	2.8745	2.44331	2.56141	2.76916	3.12993	3.8048
ENSG00000128965.11_2	CHAC1	chr15:41245160-41248717	+	protein_coding	0.977767	1.96941	0.000523099	0.00252501	2.35046	1.3727	2.05082	0.803347	1.63656	1.56191	2.19484	1.53976	3.08342	2.83751	3.89953	4.05484	4.67773	6.98453
ENSG00000129048.6_2	ACKR4	chr3:132316081-132337811	+	protein_coding	-0.653742	0.63563	3.40017e-05	0.000266038	0.101942	0.755684	0.643557	0.577325	0.667538	0.390152	1.10361	0.8327	0.121554	0.0822456	0.049993	0	0.198931	0
ENSG00000129083.12_3	COPB1	chr11:14464986-14521573	-	protein_coding	0.778221	1.71502	4.34742e-06	4.8627e-05	6.58567	5.80745	54.9977	51.8815	52.5488	48.068	59.988	64.0169	82.9533	87.7357	92.4668	94.2346	109.212	106.42
ENSG00000129226.13_3	CD68	chr17:7482785-7485431	+	protein_coding	-1.31982	0.400586	3.11553e-07	5.80282e-06	2.78135	4.10117	13.4793	16.4768	20.2533	15.4889	16.0715	15.8792	5.68369	7.06478	7.23956	4.89104	5.66192	5.05787
ENSG00000129353.14_3	SLC44A2	chr19:10713133-10755235	+	protein_coding	-0.632555	0.645033	7.99199e-05	0.000534863	4.13184	4.76439	25.8319	24.7744	31.8698	27.7037	23.5642	24.1463	16.2266	21.5505	14.6096	15.3978	16.2385	15.9361
ENSG00000129422.14_3	MTUS1	chr8:17501304-17658426	-	protein_coding	-1.85992	0.275491	1.91304e-10	1.75203e-08	1.53025	3.39017	9.8223	8.59421	10.1839	8.56283	10.696	9.22613	2.11634	2.12197	2.03508	1.81532	1.84985	1.4508
ENSG00000129538.13_2	RNASE1	chr14:21269387-21271437	-	protein_coding	1.55405	2.93641	2.40278e-07	4.73136e-06	1.76266	0.208601	0.0560602	0.208186	0	0.214107	0.300639	0.181773	3.58659	2.65307	2.29857	1.54635	2.17469	2.4165
ENSG00000129680.15_2	MAP7D3	chrX:135295379-135338641	-	protein_coding	1.15252	2.22301	3.33766e-06	3.93324e-05	4.62553	3.47301	10.4412	10.3812	11.5934	12.7507	8.28256	7.95544	24.9486	22.3111	27.2394	27.4227	19.6174	21.5996
ENSG00000129824.15_3	RPS4Y1	chrY:2709527-2800041	+	protein_coding	5.03768	32.8467	1.69387e-09	9.03028e-08	5.1959	0.158223	0.132074	0.120429	0.4104	0	0.0375824	0.0402892	24.8427	26.0109	31.5121	29.0192	49.9648	68.8458
ENSG00000130005.12_2	GAMT	chr19:1397025-1401569	-	protein_coding	1.49818	2.82487	0.000267635	0.00145516	3.08362	1.58544	1.587	1.65405	1.85789	2.34673	3.4192	1.51694	5.93198	6.19255	4.86448	5.26363	12.2103	14.3415
ENSG00000130024.14_2	PHF10	chr6:170104001-170125662	-	protein_coding	-1.39547	0.380121	3.11824e-05	0.00024768	1.92707	3.32253	10.2502	9.84846	10.2181	10.541	6.08123	7.95974	3.46532	3.35034	3.47186	3.62364	2.17652	1.37044
ENSG00000130176.7_2	CNN1	chr19:11649532-11661138	+	protein_coding	1.03745	2.05259	4.66073e-07	7.98998e-06	1.30212	0.264677	0.119901	0.13609	0.242655	0.175451	0.209089	0.337975	1.40376	1.15527	1.06184	1.56355	1.90071	1.83056
ENSG00000130203.9_3	APOE	chr19:45409011-45412650	+	protein_coding	0.940744	1.91952	4.26849e-06	4.79406e-05	1.55042	0.609672	0.554584	0.2428	0.65802	0.404493	0.743234	0.609519	2.00374	1.50837	2.45517	2.03118	1.52283	2.17179
ENSG00000130204.12_4	TOMM40	chr19:45393826-45406946	+	protein_coding	0.811257	1.75474	3.81238e-05	0.000291613	5.03349	4.22223	15.5438	17.3704	14.8255	19.0182	20.9603	18.9957	27.8628	32.6153	27.8496	27.6245	38.7254	37.7761
ENSG00000130208.9_3	APOC1	chr19:45417504-45422606	+	protein_coding	-0.852473	0.553835	0.0104658	0.0312644	0.77428	1.62675	1.28809	1.02942	1.67771	1.67126	5.68842	2.90446	0.364609	0.733835	0.64966	0.633029	1.0587	0.907619
ENSG00000130300.8_2	PLVAP	chr19:17462257-17488159	-	protein_coding	2.63519	6.21256	4.02889e-08	1.13124e-06	3.54907	0.913882	0.874528	0.880441	1.13725	1.23269	0.626562	0.635042	13.1335	14.0969	12.1381	11.3639	9.3455	6.17263
ENSG00000130303.12_3	BST2	chr19:17513748-17516457	-	protein_coding	-6.29472	0.012738	2.76823e-12	9.21348e-10	0.13854	6.43326	78.1806	91.4399	61.5996	67.5986	108.298	120.239	0.162749	0	0.213589	0	0.114845	0.130986
ENSG00000130305.16_2	NSUN5	chr7:72716514-72722864	-	protein_coding	-0.589049	0.664781	0.00215773	0.0083649	2.16131	2.75036	4.30676	5.852	4.80993	6.6291	6.72777	6.45244	2.72209	3.25102	3.12305	2.90102	4.22734	5.02223
ENSG00000130311.10_2	DDA1	chr19:17420327-17434110	+	protein_coding	0.656729	1.5765	0.017004	0.0465656	4.15681	3.50008	14.6211	8.70618	7.44817	16.2987	8.70432	8.75611	11.7337	19.3408	20.0071	20.2801	20.4028	11.9963
ENSG00000130312.6_3	MRPL34	chr19:17403418-17417652	+	protein_coding	-0.895355	0.537615	0.00651352	0.0209878	3.39979	4.29515	15.5499	16.1041	15.0027	19.2836	27.7664	20.6614	7.02487	6.38196	6.72961	18.6454	11.7713	11.033
ENSG00000130433.7_2	CACNG6	chr19:54495542-54515923	+	protein_coding	-0.848419	0.555393	0.00248095	0.00941724	1.1286	1.97702	2.2878	2.35159	2.28984	2.95746	4.88107	3.41209	1.08412	1.48002	0.574686	0.62535	2.15508	1.6177
ENSG00000130475.14_2	FCHO1	chr19:17858527-17899377	+	protein_coding	-0.682559	0.623059	2.93391e-06	3.55246e-05	0.140009	0.822569	0.984964	0.887968	0.620396	0.894274	0.517711	0.752697	0.0933223	0.243991	0.0840912	0.128882	0.0225697	0.0517424
ENSG00000130513.6_3	GDF15	chr19:18485541-18499986	+	protein_coding	1.5225	2.87288	1.76911e-09	9.32094e-08	3.72194	2.19945	4.03291	4.29871	3.18786	3.55389	3.69743	2.92979	11.2916	11.7995	13.2024	12.7024	12.819	11.4755
ENSG00000130517.13_3	PGPEP1	chr19:18451397-18480760	+	protein_coding	-0.6304	0.645997	0.000192646	0.00110175	0.3817	1.0121	0.957243	1.44802	1.14109	0.986741	0.682152	0.96307	0.287923	0.0517978	0.288516	0.558769	0.215584	0.478906
ENSG00000130589.16_2	HELZ2	chr20:62189439-62205592	-	protein_coding	-0.772762	0.585296	7.47345e-05	0.00050668	0.638864	1.41163	2.15693	1.77528	1.77869	1.95032	1.37293	1.08011	0.479699	0.701056	0.862455	0.650833	0.280418	0.43837
ENSG00000130635.15_3	COL5A1	chr9:137533620-137736689	+	protein_coding	2.76171	6.78199	0.00299846	0.0109638	4.69226	1.93055	5.97826	4.74485	5.57862	4.04462	0.336072	0.726253	42.7207	44.4243	49.0512	52.0709	7.40619	5.7332
ENSG00000130755.12_4	GMFG	chr19:39818993-39833012	-	protein_coding	-1.3073	0.404077	4.56978e-05	0.000337807	1.07807	2.38537	2.85703	3.78949	3.92411	3.37199	5.32471	7.08763	1.20314	0.972112	0.95636	0.854941	1.9962	0.874447
ENSG00000130766.4_2	SESN2	chr1:28586038-28609002	+	protein_coding	0.68335	1.60586	9.31323e-05	0.000600607	2.42672	1.74337	2.22099	2.61033	2.57021	2.36768	2.20065	2.14805	3.1493	4.00591	4.60803	4.27781	4.51569	6.12482
ENSG00000130787.13_2	HIP1R	chr12:123319000-123347507	+	protein_coding	-1.13258	0.4561	0.0001961	0.00111685	1.41181	2.54439	5.38406	5.23836	6.69403	6.62656	2.80782	3.42886	1.39323	2.15918	2.0963	2.04692	1.13105	1.33412
ENSG00000130813.17_4	C19orf66	chr19:10196798-10203928	+	protein_coding	-0.983768	0.505657	7.98041e-07	1.23751e-05	1.28624	2.27001	3.62287	4.64055	3.23275	3.62621	4.58102	3.41829	1.40452	1.36498	1.90221	1.37647	1.16888	1.4742
ENSG00000130821.15_4	SLC6A8	chrX:152953554-152962048	+	protein_coding	1.27332	2.41717	8.56921e-07	1.31388e-05	1.76011	0.486791	0.427698	0.376618	0.496532	0.590227	0.215502	0.33193	2.09092	3.16787	3.22823	2.31722	2.09633	1.69955
ENSG00000130830.14_3	MPP1	chrX:154006959-154049282	-	protein_coding	-0.926635	0.526084	0.000212475	0.00119466	1.91154	2.83818	7.87562	7.84714	4.59904	6.01746	4.73168	6.56288	2.56187	2.72387	3.6941	1.85548	3.66403	2.41923
ENSG00000130881.13_4	LRP3	chr19:33668509-33699773	+	protein_coding	1.14334	2.20892	1.0507e-06	1.56016e-05	1.20797	0.0646247	0.00574609	0.058568	0.0479585	0.0729461	0.0372077	0.0537291	0.851534	1.07171	1.06772	1.32701	1.77006	1.97277
ENSG00000130956.13_2	HABP4	chr9:99212483-99253618	+	protein_coding	1.01567	2.02184	1.87509e-07	3.86518e-06	3.996	2.98033	7.07236	6.55359	7.58251	8.28958	6.11857	5.98	14.4263	15.7425	16.4953	15.694	14.6723	12.9571
ENSG00000131019.10_2	ULBP3	chr6:150384286-150390231	-	protein_coding	0.766791	1.70148	4.20175e-05	0.000316426	2.85471	2.08792	4.1823	3.4447	2.39522	3.29578	3.78377	2.67381	5.93698	6.59606	6.63576	6.92697	6.47571	5.00834
ENSG00000131069.19_3	ACSS2	chr20:33459949-33515765	+	protein_coding	-0.646568	0.638798	6.73535e-05	0.000465606	2.49015	3.13672	7.66302	6.46139	7.10007	6.97815	9.69877	9.35763	4.01453	4.26864	4.79127	5.03102	4.49885	5.19857
ENSG00000131080.14_2	EDA2R	chrX:65815479-65859140	-	protein_coding	0.63624	1.55427	3.402e-05	0.000266038	0.759766	0.123525	0.0384845	0.0639635	0.208593	0.119452	0.0264838	0.0892926	0.61514	0.714759	1.05542	0.924455	0.432894	0.501201
ENSG00000131196.17_3	NFATC1	chr18:77155856-77289325	+	protein_coding	0.616676	1.53334	0.00218947	0.00846627	1.41046	0.793782	1.04707	1.05462	0.956967	0.804238	0.352372	0.351684	1.80161	2.15192	1.96669	1.84901	1.10126	1.24963
ENSG00000131323.14_3	TRAF3	chr14:103243813-103377837	+	protein_coding	0.688329	1.61142	0.0027475	0.010241	1.86182	1.17349	1.2101	1.42974	1.14486	1.23577	1.38616	1.1431	2.1081	2.33022	2.71742	5.39065	2.33256	1.81354
ENSG00000131386.17_2	GALNT15	chr3:16216156-16273499	+	protein_coding	-0.595431	0.661847	3.53971e-06	4.12845e-05	0.39739	0.992822	0.868272	0.962193	1.29555	0.927004	0.913469	1.0019	0.185887	0.245061	0.35716	0.290798	0.340352	0.505971
ENSG00000131459.12_3	GFPT2	chr5:179727690-179780387	-	protein_coding	0.632254	1.54998	0.000452386	0.00225055	2.17886	1.54661	2.56063	1.72212	2.05344	1.79695	1.80019	1.68138	4.70692	4.0101	3.7634	3.70086	2.8858	2.46414
ENSG00000131475.6_2	VPS25	chr17:40925454-40931617	+	protein_coding	-0.828045	0.563292	9.00562e-05	0.000587151	4.27641	5.10445	30.0462	32.1319	29.6842	33.4897	37.5418	38.5155	16.6227	15.5444	16.9823	15.3531	23.5886	24.1222
ENSG00000131634.13_3	TMEM204	chr16:1578689-1605581	+	protein_coding	-0.778313	0.583048	0.000293283	0.00156885	2.24674	3.02505	6.70923	7.38133	6.81649	8.66366	6.77564	6.66618	3.07424	3.70907	2.78567	3.053	4.82456	5.66584
ENSG00000131669.9_2	NINJ1	chr9:95883771-95896570	-	protein_coding	-1.1028	0.46561	0.000168756	0.000983699	2.69461	3.79741	12.8962	8.7841	13.206	11.6262	18.1038	14.507	4.29936	5.54096	4.55827	4.22208	7.06438	8.07253
ENSG00000131759.17_3	RARA	chr17:38465444-38513895	+	protein_coding	0.758771	1.69205	0.00600651	0.0196736	3.03072	2.27195	4.1162	5.63214	4.09223	4.81393	2.47234	2.63869	8.30221	8.92173	6.70251	10.4293	5.45425	4.68008
ENSG00000131773.13_3	KHDRBS3	chr8:136469700-136668965	+	protein_coding	1.1772	2.26137	3.39464e-07	6.17018e-06	1.21389	0.0366929	0.0482594	0.0316313	0	0.0187956	0.0446622	0.0120866	1.04158	1.09331	0.947989	1.33485	1.69605	1.97259
ENSG00000131788.15_3	PIAS3	chr1:145575233-145586546	+	protein_coding	-0.790057	0.578321	0.00227723	0.00876588	3.58502	4.37508	20.8146	21.8697	24.2506	25.6615	12.1788	17.0361	11.997	13.4681	12.2546	12.9262	8.34488	8.20808
ENSG00000131791.7_2	PRKAB2	chr1:146626685-146644129	-	protein_coding	0.701329	1.626	1.18455e-06	1.73146e-05	2.84034	2.13901	3.8159	3.12778	3.71017	3.81695	2.88617	3.16599	5.57684	5.77214	6.94918	6.41536	6.05229	6.28855
ENSG00000131873.5_2	CHSY1	chr15:101715928-101792137	-	protein_coding	-0.779124	0.58272	0.00285106	0.0105521	3.93152	4.71064	27.8221	28.0426	29.7889	26.8891	17.017	23.8885	15.7348	17.3295	17.2238	18.1272	11.0182	8.82044
ENSG00000132004.12_2	FBXW9	chr19:12798867-12807457	-	protein_coding	-0.947599	0.518495	0.00242573	0.00922549	1.766	2.7136	3.78583	5.46332	4.3542	5.92994	8.24928	6.50407	1.55758	2.14567	1.57357	1.88409	4.24849	3.9384
ENSG00000132031.12_2	MATN3	chr2:20191872-20212455	-	protein_coding	-1.60621	0.328459	2.44281e-07	4.78258e-06	2.13648	3.74269	14.3671	11.9739	12.4646	10.9793	11.1495	13.7274	3.22587	2.75942	4.13368	5.07077	2.65343	2.99438
ENSG00000132207.17_4	SLX1A	chr16:30205208-30208882	+	protein_coding	-0.682112	0.623252	0.0145327	0.0409484	2.55484	3.23695	7.18684	8.23143	6.1737	7.48792	13.402	9.59669	3.85932	4.14707	3.93925	3.42044	7.43027	7.94136
ENSG00000132274.15_3	TRIM22	chr11:5710919-5758319	+	protein_coding	-1.76532	0.294162	8.454e-09	3.09285e-07	1.55696	3.32228	9.09366	6.74931	9.59866	8.64677	10.8748	9.54544	1.83125	1.66675	2.50227	2.05368	1.89927	1.77163
ENSG00000132394.10_2	EEFSEC	chr3:127872297-128127489	+	protein_coding	-0.696161	0.617213	4.10469e-05	0.000310679	2.24549	2.94165	6.10375	5.96197	6.59863	7.79107	6.73434	7.04863	2.68884	3.79385	4.13852	3.39308	4.6429	4.0474
ENSG00000132423.11_3	COQ3	chr6:99817276-99842080	-	protein_coding	-0.77233	0.585471	3.31194e-07	6.05017e-06	3.34456	4.11689	16.0557	14.3686	15.3729	16.8994	18.4775	17.2323	8.97818	10.6541	8.88916	8.97307	9.18334	8.40742
ENSG00000132429.9_2	POPDC3	chr6:105606155-105627870	-	protein_coding	1.50464	2.83754	6.70801e-07	1.082e-05	2.03332	0.528685	0.37642	0.453117	0.35695	0.25819	0.537077	0.717286	3.16805	3.18996	3.33942	1.85082	4.39499	3.03659
ENSG00000132470.13_2	ITGB4	chr17:73717408-73753899	+	protein_coding	-0.95616	0.515427	0.000964175	0.0042374	0.718857	1.67502	3.03221	2.56848	3.23867	2.01116	1.20219	1.62142	1.00051	0.82862	0.80356	1.04359	0.262359	0.167923
ENSG00000132530.16_3	XAF1	chr17:6658766-6678966	+	protein_coding	-1.66766	0.314764	2.22275e-08	6.83757e-07	0.00587206	1.67353	1.2605	2.45907	2.53187	2.14119	2.74321	2.24482	0	0	0	0.0247218	0	0
ENSG00000132561.13_3	MATN2	chr8:98881068-99048944	+	protein_coding	1.2091	2.31193	3.98023e-11	6.0527e-09	1.24492	0.0358233	0.0327433	0.022668	0.0200043	0.0773933	0	0	1.22944	1.26789	1.56146	1.54575	1.39015	1.24909
ENSG00000132640.14_3	BTBD3	chr20:11871371-11907257	+	protein_coding	0.639008	1.55726	0.0366556	0.0870069	3.52982	2.89082	7.52087	7.41161	7.97163	2.94958	6.11001	8.21889	6.85119	11.5401	14.388	15.0934	11.3096	6.91024
ENSG00000132669.12_3	RIN2	chr20:19867165-19983101	+	protein_coding	-1.45065	0.365857	3.11555e-06	3.71986e-05	1.99533	3.44598	11.2016	11.0336	10.235	9.94864	7.35113	10.1062	4.00932	2.93516	3.38383	3.98046	1.91587	2.20104
ENSG00000132821.11_2	VSTM2L	chr20:36531506-36573752	+	protein_coding	0.868067	1.82522	0.000861939	0.00386468	1.77662	0.908549	0.691606	0.909461	0.486327	0.941134	1.00221	1.34484	1.11261	3.00238	3.16773	1.8877	3.14602	2.83414
ENSG00000132965.9_2	ALOX5AP	chr13:31287615-31338563	+	protein_coding	-1.20626	0.433391	6.7936e-07	1.09304e-05	0.471272	1.67753	1.68002	2.66945	2.43199	2.76001	1.90908	1.90198	0.206925	0.388626	0.364815	0.372187	0.301248	0.738159
ENSG00000132970.12_3	WASF3	chr13:27131840-27263085	+	protein_coding	2.60297	6.07536	3.34844e-08	9.74261e-07	3.8477	1.24473	1.38584	1.16777	1.79102	1.80626	1.3059	0.895889	15.28	14.2293	16.5952	17.3853	9.96301	9.1275
ENSG00000133083.14_2	DCLK1	chr13:36342789-36705443	-	protein_coding	-0.827111	0.563657	6.10608e-06	6.41444e-05	0.403297	1.23041	1.59199	1.91001	1.41497	1.26038	1.11337	0.917525	0.41812	0.294303	0.360423	0.419402	0.251431	0.206402
ENSG00000133101.9_2	CCNA1	chr13:37005657-37017019	+	protein_coding	-0.596132	0.661525	0.000439181	0.00219205	0.238588	0.83472	0.812184	0.507812	0.446943	0.746686	1.32766	1.00225	0.0774406	0.0509303	0.281196	0.216589	0.18624	0.288351
ENSG00000133106.14_3	EPSTI1	chr13:43460524-43566407	-	protein_coding	-3.23342	0.106327	2.4676e-11	4.43065e-09	1.76749	5.00091	32.0177	29.0242	31.1582	28.7597	32.7179	32.693	2.3168	2.10479	3.16872	2.85795	2.58479	1.6232
ENSG00000133110.14_2	POSTN	chr13:38136720-38172981	-	protein_coding	2.92861	7.61378	2.1311e-10	1.90072e-08	3.19258	0.263966	0.255755	0.221757	0.329115	0.187479	0.0921723	0.133444	7.14246	6.13101	9.26053	10.5236	7.23172	9.33279
ENSG00000133121.20_3	STARD13	chr13:33677272-33924767	-	protein_coding	-0.625094	0.648378	0.000551702	0.00263881	2.54029	3.16538	9.56307	9.00335	9.21939	7.94134	5.73803	7.01582	4.90385	5.0259	5.53355	5.59424	3.82041	4.24392
ENSG00000133169.5_2	BEX1	chrX:102317579-102319168	-	protein_coding	2.99047	7.94733	2.06183e-06	2.67197e-05	5.45851	2.46804	2.76706	4.65831	4.30912	4.47173	4.87607	6.8851	26.3652	31.4254	35.6668	35.206	68.3299	87.5117
ENSG00000133216.16_3	EPHB2	chr1:23037332-23247993	+	protein_coding	0.884795	1.8465	5.75317e-06	6.10955e-05	3.4904	2.6056	5.58261	5.90904	5.56007	5.87438	3.51929	4.48478	9.68438	10.5261	10.3625	10.3801	9.73611	10.7866
ENSG00000133321.10_2	RARRES3	chr11:63304281-63313934	+	protein_coding	-2.11166	0.231381	4.19297e-06	4.7209e-05	1.21905	3.33071	8.16541	8.50963	5.48575	7.17882	14.4332	13.5358	1.10585	0.831231	1.49453	1.15384	1.24046	2.42856
ENSG00000133687.15_4	TMTC1	chr12:29653773-29937692	-	protein_coding	-0.653944	0.635541	0.00090558	0.00402395	2.39974	3.05368	7.70801	7.22688	8.47549	6.55387	6.19141	7.88701	6.16691	4.70196	4.24283	4.75764	3.57236	2.82867
ENSG00000133789.14_2	SWAP70	chr11:9685624-9774538	+	protein_coding	1.16785	2.24677	5.60285e-06	5.98251e-05	5.19561	4.02775	18.3023	18.7717	17.7909	11.5002	11.8268	15.3762	37.2111	36.6245	38.5374	39.0245	30.4387	32.8645
ENSG00000133816.13_3	MICAL2	chr11:12115555-12285336	+	protein_coding	-0.706624	0.612752	1.36853e-05	0.000124169	3.2104	3.91702	14.6544	14.8975	16.3494	14.2104	12.2585	12.6445	8.10276	8.35006	8.62421	8.84261	9.43778	6.47275
ENSG00000133818.13_3	RRAS2	chr11:14299472-14386052	-	protein_coding	1.06902	2.09801	3.97337e-07	6.98719e-06	6.34719	5.27817	34.9352	35.7266	34.8193	32.3811	48.2469	42.9374	85.9918	76.9277	78.2188	78.0638	85.3072	78.4599
ENSG00000134030.13_3	CTIF	chr18:46065417-46389588	+	protein_coding	0.601993	1.51781	0.0359554	0.0856277	2.10091	1.49892	1.89338	2.25576	2.63454	2.12472	1.09981	1.26889	3.84084	4.64861	5.02745	3.66811	2.59972	1.25017
ENSG00000134107.4_2	BHLHE40	chr3:5020801-5027008	+	protein_coding	-0.653	0.635957	2.91466e-05	0.000235206	3.35906	4.01206	17.6209	14.3862	15.4704	14.7827	13.2975	15.5661	8.0751	9.42909	10.484	10.152	7.51102	10.3121
ENSG00000134108.12_2	ARL8B	chr3:5163905-5222597	+	protein_coding	0.827699	1.77485	0.0193146	0.051812	3.89832	3.07062	4.87499	8.23463	7.90727	9.45071	10.1169	5.26305	29.1436	11.3111	8.17369	13.2126	10.4548	18.8319
ENSG00000134138.19_2	MEIS2	chr15:37181405-37393500	-	protein_coding	1.33591	2.52435	2.45747e-06	3.09646e-05	1.58593	0.250019	0.181972	0.113011	0.209793	0.249	0.157413	0.229451	2.40845	2.61673	2.65785	2.24912	1.33598	1.13869
ENSG00000134184.12_3	GSTM1	chr1:110230436-110251661	+	protein_coding	2.40334	5.29026	7.58948e-13	4.44656e-10	2.71742	0.314081	0.261734	0.378798	0.329374	0.236217	0.0940817	0.180392	5.74547	5.56544	5.69993	5.51172	5.1377	5.82496
ENSG00000134186.11_2	PRPF38B	chr1:109234945-109244425	+	protein_coding	0.857075	1.81136	0.00231073	0.00887481	3.03914	2.18207	3.52404	3.43614	3.45395	3.83236	4.72343	2.53276	10.4578	10.5894	4.63902	4.62913	7.09322	8.04298
ENSG00000134198.9_2	TSPAN2	chr1:115590632-115632121	-	protein_coding	0.869161	1.8266	8.46213e-07	1.30039e-05	1.42299	0.553827	0.523222	0.399225	0.592303	0.428956	0.405551	0.468144	1.56804	1.24069	1.9295	1.73625	1.49541	2.22922
ENSG00000134202.10_2	GSTM3	chr1:110276554-110283660	-	protein_coding	2.54206	5.82421	1.06355e-10	1.21959e-08	3.53756	0.995494	0.919354	0.854879	0.948973	0.824535	1.16679	1.28979	10.4198	10.0347	9.22067	9.40594	11.7206	13.3805
ENSG00000134243.11_3	SORT1	chr1:109852190-109940573	-	protein_coding	-0.625509	0.648191	0.000206892	0.00117001	3.87774	4.50325	22.1595	23.7697	25.847	22.8108	16.1422	20.6421	11.9684	12.5185	15.059	16.0583	12.9624	14.0478
ENSG00000134245.17_2	WNT2B	chr1:113009163-113072787	+	protein_coding	0.96635	1.95389	0.000103596	0.000654475	1.87421	0.907856	1.0026	1.03023	1.20188	0.943848	0.962909	0.277192	2.91526	2.88492	3.2556	3.36551	2.06643	1.80144
ENSG00000134247.9_2	PTGFRN	chr1:117452679-117532980	+	protein_coding	3.26319	9.60106	1.07603e-12	5.30515e-10	3.406	0.142807	0.106853	0.0856051	0.110694	0.135235	0.0521288	0.13612	9.22139	9.53148	11.1674	11.3559	8.76436	7.9771
ENSG00000134259.3_2	NGF	chr1:115828539-115880857	-	protein_coding	4.30666	19.7895	1.34623e-11	2.93792e-09	4.44088	0.134219	0.178571	0.074801	0.268509	0	0	0.087543	17.3726	17.5271	18.54	19.8003	24.2025	29.1036
ENSG00000134291.11_2	TMEM106C	chr12:48357352-48362661	+	protein_coding	-0.630312	0.646037	0.016513	0.0454491	3.21873	3.84904	9.22199	9.13385	14.0778	14.0982	19.0659	17.9248	5.93417	7.78793	6.85533	8.49603	12.1261	9.91139
ENSG00000134321.11_2	RSAD2	chr2:7005937-7038370	+	protein_coding	-1.17938	0.441541	0.000322264	0.00169399	0	1.17938	1.05723	0.667879	0.930634	0.580539	2.94182	2.26982	0	0	0	0	0	0
ENSG00000134324.11_3	LPIN1	chr2:11817721-11967535	+	protein_coding	-1.0588	0.480031	8.389e-05	0.000555171	1.65399	2.71279	5.7653	6.18207	6.80613	6.51077	3.85967	4.73477	2.14184	2.32415	2.93406	2.87533	1.74194	1.22497
ENSG00000134326.11_4	CMPK2	chr2:6980701-7006766	-	protein_coding	-1.05619	0.480902	4.91682e-05	0.000357659	0.00871125	1.0649	1.01345	0.602397	0.766424	0.772859	2.15468	1.63002	0	0	0.0368933	0	0	0
ENSG00000134463.14_3	ECHDC3	chr10:11784365-11806069	+	protein_coding	0.782562	1.72018	0.00276549	0.0102957	1.55803	0.775469	0.832751	0.782747	0.420133	0.59123	1.04749	0.664023	1.3799	1.21192	1.58353	1.49734	3.25819	3.50652
ENSG00000134470.20_4	IL15RA	chr10:5985602-6020150	-	protein_coding	-0.73526	0.60071	7.65458e-08	1.8753e-06	0.3332	1.06846	1.19425	1.19959	0.934771	1.32261	1.12281	0.847945	0.204155	0.254203	0.283705	0.299603	0.262666	0.256621
ENSG00000134508.12_3	CABLES1	chr18:20714528-20840431	+	protein_coding	1.51258	2.85319	6.07599e-06	6.39268e-05	2.58011	1.06754	1.01858	1.20476	1.19817	0.895995	1.20665	1.07074	2.56713	5.03269	4.94043	5.08049	5.7412	7.72624
ENSG00000134531.9_3	EMP1	chr12:13349650-13372873	+	protein_coding	0.874827	1.83379	1.44621e-07	3.17904e-06	6.23722	5.3624	37.4559	41.1419	38.6529	37.5689	38.5636	48.4276	74.583	73.4848	74.2168	69.1017	72.215	83.8034
ENSG00000134533.6_3	RERG	chr12:15260717-15501609	-	protein_coding	1.57057	2.97021	3.57711e-08	1.0212e-06	1.68234	0.111773	0.108481	0	0.0893439	0.0521167	0.157635	0.082316	2.15516	1.79475	1.76319	1.85533	3.09057	2.84055
ENSG00000134574.11_2	DDB2	chr11:47236016-47260791	+	protein_coding	0.673682	1.59514	0.00368462	0.0130159	3.09995	2.42627	4.11644	3.44918	4.02371	3.71274	6.10905	5.29401	5.5875	6.74349	6.42598	6.88416	9.58581	11.5656
ENSG00000134668.12_3	SPOCD1	chr1:32256023-32281652	-	protein_coding	0.662726	1.58307	4.8288e-05	0.000352185	2.77382	2.11109	2.89723	4.01293	2.9911	3.79967	3.09441	3.24296	5.11673	5.65267	5.45527	5.52583	5.7601	7.83071
ENSG00000134686.18_3	PHC2	chr1:33789224-33896653	-	protein_coding	-0.830159	0.562467	0.000343284	0.00178023	4.11924	4.9494	23.6373	30.0415	29.2587	31.2703	35.3191	31.0762	14.1163	14.1022	14.898	12.9389	21.6353	23.0572
ENSG00000134758.13_3	RNF138	chr18:29671818-29711524	+	protein_coding	-0.787923	0.579177	0.0206642	0.0548178	2.86544	3.65336	8.36606	9.45592	16.9224	18.4907	8.40238	11.3381	5.02489	5.44307	5.85851	14.0989	5.67492	4.58258
ENSG00000134775.15_2	FHOD3	chr18:33877677-34360018	+	protein_coding	0.908048	1.87651	3.77301e-06	4.3522e-05	1.20665	0.298598	0.337039	0.230426	0.239964	0.312365	0.0772333	0.200461	1.18646	1.1795	1.68618	1.88487	1.0594	0.987558
ENSG00000134802.17_3	SLC43A3	chr11:57174427-57195053	-	protein_coding	-1.37218	0.386308	7.08246e-08	1.76686e-06	1.21071	2.58288	4.12508	4.36997	6.27291	5.87259	4.50265	5.11053	1.36844	1.48496	0.939194	1.40117	1.38172	1.35526
ENSG00000134824.13_3	FADS2	chr11:61560452-61634826	+	protein_coding	-1.09821	0.467095	0.000112122	0.000698958	2.89692	3.99513	12.6244	11.8709	14.2947	12.0635	23.755	17.9559	5.4301	5.74473	6.78296	7.19832	8.59221	5.43269
ENSG00000134874.17_2	DZIP1	chr13:96230456-96296957	-	protein_coding	0.831563	1.77961	6.66111e-06	6.86019e-05	1.8639	1.03234	1.0583	1.15713	1.19562	1.14971	0.764258	0.980209	2.71008	2.72935	3.22475	3.2214	2.02281	2.1179
ENSG00000134882.15_3	UBAC2	chr13:99853028-100038688	+	protein_coding	-0.709942	0.611345	0.0056338	0.0186871	2.79	3.49994	10.3026	9.3301	10.0364	9.66426	13.1183	9.80695	2.85354	5.88748	6.03563	5.78783	7.69034	8.93697
ENSG00000134884.13_3	ARGLU1	chr13:107194021-107220512	-	protein_coding	-0.634297	0.644255	0.00115135	0.00493909	3.28389	3.91819	15.389	14.7135	16.7734	18.2655	9.68462	11.6712	8.62597	8.92313	9.97575	9.48137	7.52197	8.11623
ENSG00000134954.14_2	ETS1	chr11:128328656-128457453	-	protein_coding	0.763538	1.69765	0.00072192	0.00333265	5.38719	4.62365	30.3809	31.4717	19.6413	28.705	16.9547	19.0089	41.2364	37.0991	44.7866	42.4093	39.1786	40.8126
ENSG00000134986.13_4	NREP	chr5:110998318-111333161	-	protein_coding	-1.08451	0.471551	2.9476e-06	3.5627e-05	1.78548	2.86999	6.12591	5.64719	5.43869	5.09282	8.1971	7.93266	2.15564	2.88749	2.24613	2.86003	2.30804	2.30076
ENSG00000135045.6_2	C9orf40	chr9:77561497-77567802	-	protein_coding	-0.642098	0.640781	1.05788e-05	0.000100668	2.25435	2.89644	6.68094	5.93002	5.96407	5.55355	8.32872	6.51949	3.8229	4.21095	3.72656	3.45892	3.72525	3.71333
ENSG00000135046.13_3	ANXA1	chr9:75766673-75785309	+	protein_coding	1.07315	2.10402	8.84657e-11	1.04974e-08	8.12787	7.05472	138.531	128.748	141.326	132.823	126.069	125.028	279.228	270	278.093	284.563	298.315	263.445
ENSG00000135047.14_2	CTSL	chr9:90340434-90346308	+	protein_coding	0.799635	1.74066	3.12551e-07	5.80282e-06	5.5725	4.77286	26.2281	26.8207	24.5272	24.9331	25.8925	29.958	40.2438	44.0949	48.1617	47.5259	53.0671	47.4074
ENSG00000135063.17_3	FAM189A2	chr9:71939488-72007371	+	protein_coding	0.640541	1.55891	9.3751e-05	0.000603456	0.656105	0.0155639	0	0.0194407	0.046524	0	0	0	0.266949	0.3721	0.495273	0.592124	0.927685	0.919397
ENSG00000135069.13_2	PSAT1	chr9:80912059-80945009	+	protein_coding	1.20361	2.30316	4.72983e-08	1.28829e-06	6.10351	4.89989	29.2311	25.7593	28.829	25.2351	33.1725	31.731	65.7044	64.7338	65.9634	71.5386	60.6444	79.4983
ENSG00000135083.14_3	CCNJL	chr5:159678659-159772403	-	protein_coding	0.65441	1.57397	1.61793e-06	2.20123e-05	0.966193	0.311783	0.127156	0.304675	0.285323	0.313201	0.206278	0.221403	1.0035	0.7848	1.13952	1.19098	0.735416	0.91153
ENSG00000135111.15_4	TBX3	chr12:115108059-115121969	-	protein_coding	-2.49553	0.177325	1.77274e-06	2.36008e-05	1.47378	3.96931	18.7464	18.4782	19.2205	17.5269	7.55599	10.9779	2.28133	1.71138	1.92184	2.84648	0.962261	1.33987
ENSG00000135114.12_2	OASL	chr12:121456914-121477045	-	protein_coding	-4.05766	0.0600513	7.29972e-11	9.30953e-09	0.175821	4.23348	16.1968	14.6749	16.6182	14.0361	26.676	21.417	0.0521362	0.145507	0.18074	0.255546	0.0732032	0.0834905
ENSG00000135312.6_3	HTR1B	chr6:78171470-78173490	-	protein_coding	-1.40109	0.378642	5.48998e-06	5.88965e-05	1.01098	2.41207	4.49489	5.70798	3.96739	4.96706	3.18252	3.97455	1.0656	1.73616	1.2296	0.954796	0.935619	0.404972
ENSG00000135338.13_2	LCA5	chr6:80194708-80247175	-	protein_coding	-0.834426	0.560806	7.75075e-06	7.74936e-05	0.772467	1.60689	2.65958	2.1239	2.39315	2.1463	1.51636	1.60037	0.683029	0.697302	0.85443	0.710086	0.480363	0.852542
ENSG00000135503.12_3	ACVR1B	chr12:52345451-52390862	+	protein_coding	-1.09044	0.469618	0.00123333	0.00524136	2.21357	3.30401	10.7266	11.3001	10.2209	4.79661	7.34082	10.8614	3.23871	1.66335	4.59407	4.69255	4.19884	4.32715
ENSG00000135587.8_3	SMPD2	chr6:109761966-109765122	+	protein_coding	-0.733011	0.601647	0.00509874	0.0171457	1.70254	2.43555	3.31575	4.03212	3.34924	5.55802	6.36089	4.49686	1.76539	1.73785	1.86618	1.6725	4.23711	2.91389
ENSG00000135631.16_3	RAB11FIP5	chr2:73300510-73383849	-	protein_coding	0.707242	1.63268	0.00359796	0.0127626	3.75153	3.04429	7.40738	6.76024	7.51161	8.37322	7.48956	6.13204	11.7246	10.1546	13.7216	10.7115	9.27353	22.744
ENSG00000135636.13_2	DYSF	chr2:71680852-71913898	+	protein_coding	2.02178	4.06086	2.26778e-10	2.00949e-08	3.06741	1.04563	1.31852	1.09215	1.19536	1.17196	0.646073	1.03228	6.90136	6.61094	7.50738	7.70733	7.56005	8.09921
ENSG00000135821.17_3	GLUL	chr1:182350839-182361341	-	protein_coding	-0.599544	0.659963	0.0464902	0.105576	3.93883	4.53837	23.2023	10.2975	25.7788	24.8425	27.3397	28.3601	12.7912	10.8054	11.3007	13.2947	19.084	21.6254
ENSG00000135842.16_2	FAM129A	chr1:184759858-184943682	-	protein_coding	0.604559	1.52051	1.04564e-05	9.9922e-05	1.27949	0.674936	0.509691	0.435566	0.682077	0.599977	0.662949	0.707284	1.42575	1.54675	1.74754	1.542	1.36419	1.00616
ENSG00000135916.15_3	ITM2C	chr2:231729354-231743963	+	protein_coding	1.83846	3.57628	9.53759e-06	9.22395e-05	4.32075	2.48229	3.10134	3.50526	5.00173	4.31864	5.62123	6.79481	16.193	20.3597	18.0904	11.8556	30.1256	21.7029
ENSG00000135919.12_3	SERPINE2	chr2:224839829-224904036	-	protein_coding	4.75774	27.0534	6.19615e-13	3.84331e-10	6.191	1.43326	1.99233	2.06061	2.00139	1.465	1.36724	1.41835	74.4283	79.9036	73.6568	77.2903	74.1893	55.7046
ENSG00000135976.17_3	ANKRD36	chr2:97779233-97930258	+	protein_coding	0.653129	1.57257	0.000103121	0.000652682	1.83341	1.18028	1.27457	1.19308	1.42311	1.46403	1.33481	0.947918	2.31438	2.06149	2.50252	2.11166	3.07588	3.545
ENSG00000136052.9_3	SLC41A2	chr12:105196331-105352522	-	protein_coding	-0.912312	0.531333	3.23877e-07	5.95034e-06	0.644724	1.55704	2.19139	1.76555	1.80967	1.79397	1.86151	2.27381	0.764898	0.6276	0.665097	0.628153	0.395539	0.343826
ENSG00000136114.15_2	THSD1	chr13:52951302-52980629	-	protein_coding	-0.817675	0.567356	2.04276e-05	0.00017444	2.34938	3.16706	9.71498	8.43938	8.06629	7.43431	6.89917	7.59565	3.52504	4.49584	4.27904	4.79645	2.97938	4.78384
ENSG00000136153.19_3	LMO7	chr13:76194570-76434006	+	protein_coding	1.43359	2.70117	0.000114519	0.000709686	4.00091	2.56732	5.88019	5.83431	7.7815	6.18093	2.62089	3.03821	16.0045	14.6741	18.0852	18.7529	12.2008	11.6967
ENSG00000136158.11_3	SPRY2	chr13:80910111-80915086	-	protein_coding	-1.84776	0.277824	3.16086e-10	2.47891e-08	3.17826	5.02602	29.5405	33.6964	31.3496	30.3969	28.7217	36.4024	7.61445	9.40322	7.68003	9.007	7.65324	7.16786
ENSG00000136205.16_2	TNS3	chr7:47314752-47622156	-	protein_coding	-0.754728	0.592658	0.0415197	0.096324	2.1198	2.87453	9.07474	8.05006	9.18571	7.50924	2.91372	4.02989	4.32742	4.38959	4.35124	4.95225	1.988	1.4669
ENSG00000136231.13_2	IGF2BP3	chr7:23349828-23510086	-	protein_coding	-1.27407	0.41349	1.77116e-05	0.00015414	3.20059	4.47466	27.0955	24.5752	23.1739	22.0643	15.5295	17.2406	10.7255	10.1768	6.88265	7.66893	8.48614	6.10653
ENSG00000136247.14_2	ZDHHC4	chr7:6617065-6629005	+	protein_coding	-1.01309	0.495483	9.28076e-05	0.000599362	2.45049	3.46358	8.20512	9.10227	8.48417	8.75008	14.9963	12.1032	3.46148	4.77275	3.77693	4.09574	5.42389	5.62232
ENSG00000136378.14_2	ADAMTS7	chr15:79051545-79103773	-	protein_coding	0.764733	1.69906	0.00188591	0.0074513	1.36653	0.601801	0.749765	0.562364	0.839128	0.739903	0.08469	0.287528	1.67825	2.03902	2.19482	2.02395	0.918261	0.948459
ENSG00000136379.11_3	ABHD17C	chr15:80972025-81047962	+	protein_coding	-0.861207	0.550492	2.44752e-06	3.09244e-05	0.957894	1.8191	2.43354	3.37798	2.64384	2.23674	2.31133	2.28806	0.684469	0.769684	1.17518	1.03431	0.911443	1.13058
ENSG00000136478.7_3	TEX2	chr17:62224587-62340661	-	protein_coding	-1.15035	0.450517	4.14826e-06	4.67828e-05	3.07385	4.2242	15.0593	20.7802	21.2158	19.6182	16.6782	14.0494	6.35487	6.14545	6.96319	8.80201	8.91069	7.76629
ENSG00000136514.2_2	RTP4	chr3:187086120-187089864	+	protein_coding	-1.27089	0.414403	3.76397e-06	4.34912e-05	0	1.27089	1.1583	1.14665	1.49549	0.726345	2.23465	2.05826	0	0	0	0	0	0
ENSG00000136636.12_3	KCTD3	chr1:215740735-215795149	+	protein_coding	-0.751431	0.594014	7.16512e-08	1.78422e-06	2.55471	3.30614	9.25106	8.92087	9.47007	9.50356	7.76733	8.55013	5.1141	4.6938	4.97555	5.43072	4.62636	4.4659
ENSG00000136699.19_3	SMPD4	chr2:130908965-130940323	-	protein_coding	0.891692	1.85535	7.74576e-06	7.74936e-05	3.54058	2.64889	5.43372	6.22556	6.13519	6.0386	4.00386	4.20998	11.2386	11.2596	10.9545	11.1454	9.20313	10.1696
ENSG00000136717.14_3	BIN1	chr2:127805603-127864931	-	protein_coding	1.221	2.33108	5.22755e-05	0.000377434	5.2015	3.98051	13.673	17.6006	12.6574	14.0257	14.7144	16.5778	29.5396	32.1941	28.0775	29.0243	50.7229	53.2271
ENSG00000136720.6_2	HS6ST1	chr2:128994290-129076151	-	protein_coding	-0.920077	0.528481	8.49502e-06	8.36386e-05	2.13731	3.05738	7.93761	8.40918	7.99412	7.799	6.04013	6.10294	2.91484	3.78794	3.29607	4.52958	2.81872	3.26399
ENSG00000136732.14_3	GYPC	chr2:127413509-127454251	+	protein_coding	1.12225	2.17686	0.00102871	0.00448778	3.06956	1.94731	1.97108	3.11543	2.48678	2.66773	3.75873	3.42129	5.27907	6.43596	5.92944	5.03401	10.6057	14.4515
ENSG00000136738.14_2	STAM	chr10:17686124-17757913	+	protein_coding	0.678238	1.60018	0.000186058	0.00106768	4.56441	3.88617	16.5544	15.4828	14.095	13.5065	11.4704	12.226	25.1137	23.691	25.9272	25.4756	19.3112	17.7916
ENSG00000136770.10_3	DNAJC1	chr10:22045466-22292698	-	protein_coding	1.05087	2.07178	0.000830254	0.00374667	5.34766	4.29679	19.9068	16.8919	17.5968	15.7737	21.7215	20.7436	29.2762	30.7397	34.9	31.7053	54.6535	71.5994
ENSG00000136802.11_2	LRRC8A	chr9:131644391-131680318	+	protein_coding	0.887055	1.8494	0.000343365	0.00178023	4.93141	4.04436	17.9575	16.7016	20.1848	17.2735	11.9262	11.0151	31.3972	34.5778	32.6203	31.7651	27.5456	21.2731
ENSG00000136826.14_3	KLF4	chr9:110247133-110252763	-	protein_coding	0.732743	1.6618	0.000777856	0.00354175	3.5765	2.84376	7.23692	6.63109	6.3246	7.19246	4.20919	5.96651	11.9321	14.678	9.33858	11.3074	7.80776	11.6867
ENSG00000136859.9_2	ANGPTL2	chr9:129849611-129885162	-	protein_coding	-0.794424	0.576573	2.79121e-06	3.41911e-05	0.721296	1.51572	2.25657	1.86243	1.66923	1.82788	1.73612	1.83913	0.54376	0.373876	0.90217	0.899554	0.64163	0.596197
ENSG00000136869.13_2	TLR4	chr9:120466610-120479149	+	protein_coding	1.4745	2.77888	2.91024e-10	2.36403e-08	4.90241	3.4279	9.57024	9.90047	10.1944	9.31454	8.86485	10.8396	28.0373	25.8452	27.8071	28.8279	30.693	32.7069
ENSG00000136943.10_2	CTSV	chr9:99791961-99801925	-	protein_coding	0.965926	1.95332	3.06814e-09	1.41445e-07	1.58251	0.616587	0.542477	0.507527	0.60107	0.511622	0.408253	0.639263	1.77637	1.94579	2.26827	1.91035	2.23189	1.87015
ENSG00000136982.5_3	DSCC1	chr8:120846216-120868250	-	protein_coding	-0.647497	0.638387	4.48635e-05	0.000333083	2.16637	2.81386	7.20626	5.88241	6.34163	5.57297	5.45952	5.86604	3.73371	3.45365	4.64047	3.45271	2.89789	2.96427
ENSG00000137145.20_2	DENND4C	chr9:19230433-19373543	+	protein_coding	-0.61135	0.654584	0.000888107	0.00396308	2.16606	2.77741	6.62471	5.76675	6.83045	6.14522	4.99104	5.00621	3.94418	3.61451	4.47588	3.97059	3.1025	2.20752
ENSG00000137198.9_2	GMPR	chr6:16238811-16295780	+	protein_coding	-1.19579	0.436548	1.82857e-08	5.84373e-07	2.33114	3.52692	11.6414	10.0842	9.62324	9.73185	11.1479	11.0872	3.92155	3.79667	3.66658	4.21048	5.09789	3.63824
ENSG00000137203.10_2	TFAP2A	chr6:10393419-10419892	-	protein_coding	-1.26424	0.416319	0.000389077	0.00197447	0.826061	2.0903	3.7363	4.36657	4.91345	4.43176	1.38372	2.06399	0.947805	1.27115	0.847814	0.859921	0.460066	0.398615
ENSG00000137225.12_2	CAPN11	chr6:44126548-44152139	+	protein_coding	-1.27636	0.412837	1.46236e-09	8.28022e-08	0.207885	1.48424	1.91982	1.6951	1.70504	1.72303	1.53428	2.26434	0.137161	0.26496	0.200757	0.117466	0.136551	0.0821836
ENSG00000137266.14_2	SLC22A23	chr6:3269196-3457256	-	protein_coding	0.710268	1.63611	2.39524e-05	0.000199302	0.793189	0.0829213	0.0710903	0.0964933	0.060837	0.0545393	0.0635955	0.0103011	0.854968	0.966076	0.912311	0.954482	0.397568	0.421486
ENSG00000137267.5_2	TUBB2A	chr6:3153903-3157760	-	protein_coding	0.802316	1.7439	3.30902e-05	0.000260172	5.9303	5.12799	32.9586	34.3433	29.6663	36.265	40.304	31.2741	52.1209	59.1099	56.0618	50.7627	69.5932	76.2425
ENSG00000137269.14_2	LRRC1	chr6:53659295-53788919	+	protein_coding	-2.02065	0.246446	4.56035e-12	1.22021e-09	0.485689	2.50634	5.00404	4.45092	4.1786	4.83843	4.36199	5.34101	0.452988	0.388773	0.314334	0.439789	0.32693	0.487631
[truncated: 1,273 more rows]

## Sheet: Flow- HMEC-1 vs hCMEC-D3
#log2FC >= 0.585 #p-value cut-off <= 0.05 #q-value cut-off <= 1.00 #Gene biotype: protein_coding #Condition pair: up_MF_vs_BF Column A: Track_id, The database name in gene level. Column B: Gene_Name, The name of gene. Column C: Locus, The genomic coordinates of gene. Column D: Strand, Strand of the gene. Column E: Gene_Type, The biological type of gene. Column F: log2FC, if the comparison is test…
[truncated: 2,124 more rows]

[truncated: 4 more sheets: KEGG-HMEC-1 - F vs S, KEGG-hCMEC-D3 - F vs S, KEGG-Static- HMEC-1 vs hCMEC-D3, KEGG-Flow-HMEC-1 vs hCMEC-D3]
